# Supplementary material
Source: PubMed Central journal article supplement (PMC8274106)
Supplement: ml1c00277_si_001.pdf [file ml1c00277_si_001.pdf]

# Supporting information

## **Lathyrane Diterpenoids as Novel hPXR Agonists: Isolation, Structural Modification, and Structure-Activity Relationships**

Dong Huang<sup>†</sup>, Rui-Min Wang<sup>†</sup>, Wei Li, Ying-Yuan Zhao, Fang-Yu Yuan, Xue-Long Yan, Ye Chen, Gui-Hua Tang, Hui-Chang Bi\*, and Sheng Yin\*

School of Pharmaceutical Sciences, Sun Yat-sen University, Guangzhou 510006,

China

\*Corresponding author: yinsh2@mail.sysu.edu.cn (S. Yin);

bihchang@mail.sysu.edu.cn (H.-C. Bi)

<sup>†</sup>These authors contribute equally.

## Table of contents:

### 1. Experimental section

2. **Table S1.**  $^1\text{H}$  and  $^{13}\text{C}$  NMR spectral data of compounds **1–3** in  $\text{CDCl}_3$ .
3. **Table S2.**  $^1\text{H}$  and  $^{13}\text{C}$  NMR spectral data of compounds **4** and **5** in  $\text{CDCl}_3$ .
4. **Table S3.** The gene-specific primer sequences for RT-qPCR.
5. **Figure S1.** The key  $^1\text{H}$ - $^1\text{H}$  COSY (—) and HMBC (→) correlations of compounds **1–5**
6. **Figure S2.** The key NOE (↔) correlations of compounds **1–5**.
7. **Figure S3.** ORTEP diagrams of compounds **26**, **30**, and **31**.
8. **Figure S4.** Chemical correlations of compounds **3**, **4**, **5**, **9**, **10**, **13**, **14**, and **35**.
9. **Figure S5.** The cytotoxicity of compounds **1–34**.
10. **Figure S6–S115.**  $^1\text{H}$  NMR,  $^{13}\text{C}$  NMR, HSQC, HMBC,  $^1\text{H}$ - $^1\text{H}$  COSY and NOESY spectra of compounds **1–5**, **20–26**, and **28–34**.
11. **Figure S116–S145.**  $^1\text{H}$  NMR and  $^{13}\text{C}$  NMR spectra of compounds **6–19** and **27**.
12. **Figure S146–S164.** HRESIMS spectra of compounds **1–5**, **20–26** and **28–34**.
13. **Figure S165–S185.** IR spectra of compounds **1–5**, **20–26** and **28–34**.
14. **Figure S184–S217.** The purity analyses of compounds **1–34** by HPLC.

## 1. Experimental section

### 1.1. General experimental procedures

X-ray data were collected using an Angilent Xcalibur Nova X-ray diffractometer. Melting point was measured on an X-4 melting instrument and uncorrected. Optical rotations were measured on a Perkin-Elmer 341 polarimeter. UV spectra were recorded on a Shimadzu UV-2450 spectrophotometer. IR spectra were determined on a Bruker Tensor 37 infrared spectrophotometer with KBr disks. NMR spectra were measured on a Bruker AM-400/500 spectrometer at 25 °C. HRESIMS were carried out on a Finnigan LCQ Deca instrument. A Shimadzu LC-20AT equipped with an SPD-M20A PDA detector was used for HPLC, and a YMC-pack ODS-A column (250 × 10 mm, S-5 μm, 12 nm) was used for semipreparative HPLC separation. Silica gel (300–400 mesh, Qingdao Haiyang Chemical Co. Ltd.), reversed-phase C<sub>18</sub> (Rp-C<sub>18</sub>) silica gel (12 nm, S-50 μm, YMC Co. Ltd.), Sephadex LH-20 gel (Amersham Biosciences), and MCI gel (CHP20P, 75–150 μm, Mitsubishi Chemical Industries Ltd.) were used for column chromatography (CC). All solvents were of analytical grade (Guangzhou Chemical Reagents Company, Ltd.). The purity of the samples was determined by HPLC, conducted on a Shimadzu LC-20AT series system with Inertsil ODS-SP columns (4.6 mm × 150 mm, 5 μm or 4.6 mm × 100 mm, 5 μm). The samples were eluted with a 90:10 acetonitrile/H<sub>2</sub>O mixture at a flow rate of 3 mL/min. The purity of all biologically evaluated compounds is greater than 95%.

### 1.2. Plant material

Seeds of *E. lathyris* were collected in January 2018 in Anhui Province, P. R. China, and were authenticated by one of the authors (G. H. Tang). A voucher specimen (accession number: QJZ201801) has been deposited at the School of Pharmaceutical Sciences, Sun Yat-sen University.

### 1.3. Extraction and bioassay-guided isolation

The seeds of *E. lathyris* (8 kg) were extracted with 95% EtOH (75 L × 3) at room temperature to give 817.2 g of crude extract. The extract was suspended in H<sub>2</sub>O (3 L) and successively partitioned with petroleum ether, EtOAc, and *n*-BuOH. EtOAc fraction that showed potent agonistic activity on hPXR was selected for further chemical investigation. The EtOAc extract (352.8 g) was subjected to a D101 macroporous adsorptive resins eluted with a MeOH/H<sub>2</sub>O gradient (6:4 → 10:0) to afford three fractions (Fr. I–III). Fr. II (215.6 g) was applied to silica gel CC (PE/EtOAc, 50:1 → 1:1) to give four fractions (Fr. IIA–IID). Fr. IIA was recrystallized with MeOH to afford **14** (13.2 g). Fr. IIB (15.7 g) was subjected to silica gel CC (PE/EtOAc, 40:1 → 0:1) to give three fractions (Fr. IIB<sub>1</sub>–IIB<sub>3</sub>). Fr. IIB<sub>1</sub> (246.2 mg) was separated by silica gel CC (PE/EtOAc, 50:1), followed by semi-preparative HPLC (MeCN/H<sub>2</sub>O, 80/20, 3 mL/min) to give **9** (12.6 mg, *t<sub>R</sub>* 10.6 min) and **10** (22.7 mg, *t<sub>R</sub>* 11.3 min). Fr. IIB<sub>2</sub> and Fr. IIB<sub>3</sub> were recrystallized with MeOH to afford **16** (3.2 g) and **15** (7.6 g), respectively. Fr. IIC (2.9 g) was separated by Rp-C<sub>18</sub> silica gel CC (MeOH/H<sub>2</sub>O, 6:4 → 10:0) to give five fractions (Fr. IIC<sub>1</sub>–IIC<sub>5</sub>). Fr. IIC<sub>1</sub> (132.2

mg) was subjected to silica gel CC (CH<sub>2</sub>Cl<sub>2</sub>/MeOH, 100:1 → 0:1), followed by semi-preparative chiral HPLC (MeCN/H<sub>2</sub>O, 75/25, 3 mL/min) to yield **3** (34 mg, *t*<sub>R</sub> 13.0 min). Fr. IIC<sub>2</sub> (1.435 g) was separated by Sephadex LH-20 (MeOH), followed by silica gel CC (PE/EtOAc, 10:1 → 0:1) to give three fractions (Fr. IIC<sub>2a</sub>–IIC<sub>2c</sub>). Fr. IIC<sub>2a</sub> (207.2 mg) was separated by silica gel CC (PE/EtOAc, 15:1 → 0:1), followed by semi-preparative chiral HPLC (MeCN/H<sub>2</sub>O, 70/30, 3 mL/min) to give **8** (67.3 mg, *t*<sub>R</sub> 8.9 min), **6** (29.1 mg, *t*<sub>R</sub> 11.4 min), and **7** (16.8 mg, *t*<sub>R</sub> 14.6 min). Fr. IIC<sub>2b</sub> (367.8 mg) was subjected to Rp-C<sub>18</sub> silica gel CC (MeOH/H<sub>2</sub>O, 7:3 → 10:0), followed by semi-preparative chiral HPLC (MeCN/H<sub>2</sub>O, 70/30, 3 mL/min) to give **4** (31.2 mg, *t*<sub>R</sub> 15.6 min) and **5** (18.0 mg, *t*<sub>R</sub> 14.6 min). Fr. IIC<sub>2b1</sub> was subjected to silica gel CC (PE/EtOAc, 15:1 → 0:1) and then further purified by Sephadex LH-20 (EtOH) to give **2** (90.8 mg) and **1** (24.6 mg). Fr. IIC<sub>2c</sub> (179.3 mg) was applied to silica gel CC (PE/EtOAc, 20:1 → 0:1) to give three fractions (Fr. IIC<sub>2c1</sub>–IIC<sub>2c3</sub>). Fr. IIC<sub>2c2</sub> (69.2 mg) was separated on Sephadex LH-20 (MeOH) and followed by semi-preparative chiral HPLC (MeCN/H<sub>2</sub>O, 70/30, 3 mL/min) to yield **12** (10.5 mg, *t*<sub>R</sub> 13.8 min) and **11** (16.2 mg, *t*<sub>R</sub> 14.4 min). Fr. IIC<sub>2c3</sub> (44.6 mg) was subjected to Sephadex LH-20 (MeOH) yield **13** (24.1 mg). <sup>1</sup>H and <sup>13</sup>C NMR data of **1–5** were summarized in Table S1.1.

*Compound 1.* Colorless oil; [ $\alpha$ ]<sub>D</sub><sup>25</sup> +109.1 (*c* 3.0, MeCN); UV (MeCN)  $\lambda_{\max}$  (log  $\epsilon$ ) 273 (3.97), 232 (4.18) nm; IR  $\nu_{\max}$  3460, 2928, 1722, 1659, 1453, 1370, 1272, 1113, 1004, 714 cm<sup>-1</sup>; HRESIMS *m/z* 517.2193 [M + Na]<sup>+</sup> (calcd for C<sub>29</sub>H<sub>34</sub>O<sub>7</sub>Na<sup>+</sup>,

517.2197).

*Compound 2.* Colorless oil;  $[\alpha]_D^{25} -25.0$  (*c* 3.0, MeCN); UV (MeCN)  $\lambda_{\max}$  (log  $\epsilon$ ) 274 (4.15), 232 (4.17) nm; IR  $\nu_{\max}$  3446, 2926, 1717, 1606, 1452, 1268, 1108, 1057, 714  $\text{cm}^{-1}$ ; HRESIMS  $m/z$  439.2487  $[\text{M} + \text{H}]^+$  (calcd for  $\text{C}_{27}\text{H}_{35}\text{O}_5^+$ , 439.2479).

*Compound 3.* Colorless oil;  $[\alpha]_D^{25} +55.3$  (*c* 3.0, MeCN); UV (MeCN)  $\lambda_{\max}$  (log  $\epsilon$ ) 233 (4.53), 272 (4.31) nm; IR  $\nu_{\max}$  2931, 1722, 1629, 1453, 1369, 1275, 1236, 1112, 1024, 943, 712  $\text{cm}^{-1}$ ; HRESIMS  $m/z$  559.2306  $[\text{M} + \text{Na}]^+$  (calcd for  $\text{C}_{31}\text{H}_{36}\text{O}_8\text{Na}^+$ , 559.2302).

*Compound 4.* Colorless oil;  $[\alpha]_D^{25} +202.7$  (*c* 3.0, MeCN); UV (MeCN)  $\lambda_{\max}$  (log  $\epsilon$ ) 275 (4.38) nm; IR  $\nu_{\max}$  2926, 1738, 1630, 1450, 1369, 1273, 1228, 1114, 906, 769  $\text{cm}^{-1}$ ; HRESIMS  $m/z$  571.2659  $[\text{M} + \text{Na}]^+$  (calcd for  $\text{C}_{33}\text{H}_{40}\text{O}_7\text{Na}^+$ , 571.2666).

*Compound 5.* Colorless oil;  $[\alpha]_D^{25} -46.7$  (*c* 3.0, MeCN); UV (MeCN)  $\lambda_{\max}$  (log  $\epsilon$ ) 275 (4.26) nm; IR  $\nu_{\max}$  3478, 2929, 1739, 1623, 1455, 1375, 1245, 1154, 1021  $\text{cm}^{-1}$ ; HRESIMS  $m/z$  499.2295  $[\text{M} + \text{Na}]^+$  (calcd for  $\text{C}_{26}\text{H}_{36}\text{O}_8\text{Na}^+$ , 499.2302).

#### 1.4. Preparation of **17** and **27** by alkaline hydrolysis of **15** and **14**, respectively

To a solution of **15** (30 mg, 0.047 mmol) or **14** (30 mg, 0.057 mmol) in 2 mL of MeOH was added 1% NaOH at rt for 1 h. The mixture was then diluted with 5 mL of  $\text{H}_2\text{O}$ , followed by the extraction of EtOAc (5 mL  $\times$  3). The organic layer was dried, evaporated and purified by silica gel CC (PE/EtOAc, 10:1) to afford **17** (15.3 mg) and **27** (17.2 mg).

3,5,7,15-Tetrahydroxy-14-oxolathyra-6(17),12*E*-diene (**17**). The spectroscopic

data was identical to that reported.<sup>1</sup>

3,5,15-Trihydroxy-14-oxolathyra-6(17),12*E*-diene (**27**). The spectroscopic data was identical to that reported.<sup>1</sup>

#### 1.5. Preparation of **18–22** by acylation of **17**

To a solution of **17** (20 mg, 0.057 mmol) in freshly distilled pyridine (2 mL) was added excess acyl chlorides. The reaction mixture was stirred at rt or 0 °C for 2 h and then quenched by adding 2 mL of H<sub>2</sub>O. After removal of the solvent under vacuum, the residue was purified by semi-preparative HPLC (MeCN/H<sub>2</sub>O = 75:25, 3 mL/min). The acyl chlorides used in this experiment were acetic anhydride, 2-furoyl chloride, thiophene-2-carbonyl chloride and benzoyl chloride to give the acylation products compounds **19** (11.3 mg, *t<sub>R</sub>* 14.5 min), **18** (10.6 mg, *t<sub>R</sub>* 9.4 min), **20** (11.8 mg, *t<sub>R</sub>* 10.2 min), **21** (9.6 mg, *t<sub>R</sub>* 12.7 min), and **22** (12.41 mg, *t<sub>R</sub>* 13.2 min), respectively.

7-Acetoxy-3,5,15-trihydroxy-14-oxolathyra-6(17),12*E*-diene (**18**). The spectroscopic data was identical to that reported.<sup>2</sup>

3,5,7-Triacetoxy-15-hydroxy-14-oxolathyra-6(17),12*E*-diene (**19**). The spectroscopic data was identical to that reported.<sup>3</sup>

7-(2-Furoyl)-3,5,15-trihydroxy-14-oxolathyra-6(17),12*E*-diene (**20**). Colorless oil;  $[\alpha]_D^{25} -53.3$  (*c* 0.3, MeCN); UV (MeCN)  $\lambda_{\max}$  (log  $\epsilon$ ) 253 (3.94) nm; IR (KBr)  $\nu_{\max}$  3419, 2925, 1718, 1672, 1614, 1471, 1393, 1298, 1178, 1115, 1073, 1010, 925, 763 cm<sup>-1</sup>; <sup>1</sup>H NMR (CDCl<sub>3</sub>, 400 MHz)  $\delta_H$  5.81 (1H, d, *J* = 9.3 Hz, H-12), 5.32 (1H, s, H-17a), 5.18 (1H, s, H-17b), 5.00 (1H, d, *J* = 8.2 Hz, H-7), 4.39 (1H, brs, H-3), 4.23

(1H, brs, H-5), 2.74 (1H, dd,  $J = 14.7, 10.2$  Hz, H-1a), 2.51 (1H, brs, H-4), 2.30 (1H, m, H-2), 2.05 (3H, s, H-20), 2.04 (1H, m, H-8a), 1.76 (1H, dd,  $J = 14.7, 9.8$  Hz, H-1b), 1.39 (1H, d,  $J = 9.3$  Hz, H-11), 1.27 (1H, m, H-8b), 1.25 (1H, m, H-9), 1.16 (3H, d,  $J = 6.3$  Hz, H-16), 1.15 (3H, s, H-19), 1.12 (3H, s, H-18), for 7-*O*-2-furoyl: 7.62 (1H, m), 7.28 (1H, m), 6.56 (1H, m);  $^{13}\text{C}$  NMR ( $\text{CDCl}_3$ , 100 MHz)  $\delta_{\text{C}}$  207.9 (C-14), 148.1 (C-6), 139.4 (C-13), 137.0 (C-12), 108.5 (C-17), 87.9 (C-15), 76.3 (C-3), 75.3 (C-7), 69.5 (C-5), 52.3 (C-4), 45.9 (C-1), 38.1 (C-2), 31.0 (C-9), 30.6 (C-8), 28.3 (C-18), 25.5 (C-11), 23.5 (C-10), 15.3 (C-19), 14.0 (C-16 and C-20), for 7-*O*-2-furoyl: 158.4, 146.7, 144.3, 118.3, 112.0; HRESIMS  $m/z$  467.2048  $[\text{M} + \text{Na}]^+$  (calcd for  $\text{C}_{25}\text{H}_{32}\text{O}_7\text{Na}^+$ , 467.2040).

3,5,15-Trihydroxy-7-(thiophene-2-carbonyl)-14-oxolathyra-6(17),12*E*-diene (**21**). Colorless oil;  $[\alpha]_{\text{D}}^{25} -49.3$  ( $c$  0.3, MeCN); UV (MeCN)  $\lambda_{\text{max}}$  ( $\log \epsilon$ ) 265 (4.20), 253 (4.30) nm; IR (KBr)  $\nu_{\text{max}}$  3422, 2925, 1707, 1679, 1613, 1525, 1417, 1362, 1260, 1149, 1090, 1073, 1005, 918, 751, 722, 578  $\text{cm}^{-1}$ ;  $^1\text{H}$  NMR ( $\text{CD}_3\text{OD}$ , 400 MHz)  $\delta_{\text{H}}$  6.53 (1H, d,  $J = 10.6$  Hz, H-12), 5.22 (1H, s, H-17a; 1H, m, H-7), 5.17 (1H, s, H-17b), 4.62 (1H, d,  $J = 3.0$  Hz, H-5), 4.29 (1H, dd,  $J = 3.7, 3.7$  Hz, H-3), 2.77 (1H, dd,  $J = 13.5, 8.3$  Hz, H-1a), 2.44 (1H, dd,  $J = 3.0, 3.7$  Hz, H-4), 2.10 (1H, ddd,  $J = 15.4, 6.9, 4.1$  Hz, H-8a), 1.99 (1H, m, H-2), 1.92 (3H, d,  $J = 1.0$  Hz, H-20), 1.71 (1H, dd,  $J = 13.5, 11.0$  Hz, H-1b), 1.68 (1H, m, H-8b), 1.55 (1H, dd,  $J = 10.6, 8.8$  Hz, H-11), 1.35 (1H, m, H-9), 1.20 (3H, s, H-19), 1.18 (3H, s, H-18), 1.09 (3H, d,  $J = 6.8$  Hz, H-16), for 7-*O*-2-thiophene-2-carbonyl: 7.88 (1H, dd,  $J = 3.8, 1.2$  Hz), 7.79 (1H, dd,  $J = 5.0, 1.2$  Hz), 7.19 (1H, dd,  $J = 5.0, 3.8$  Hz);  $^{13}\text{C}$  NMR ( $\text{CD}_3\text{OD}$ , 100 MHz)  $\delta_{\text{C}}$  207.0



(C-14), 151.0 (C-6), 141.6 (C-12), 138.9 (C-13), 110.0 (C-17), 88.5 (C-15), 78.3 (C-3), 78.0 (C-7), 69.1 (C-5), 53.6 (C-4), 47.2 (C-1), 39.2 (C-2), 32.4 (C-9), 31.2 (C-8), 28.8 (C-18), 27.8 (C-11), 25.3 (C-10), 15.9 (C-19), 14.0 (C-16), 13.7 (C-20), for 7-*O*-thiophene-2-carbonyl: 163.3, 134.8 × 2, 134.3, 129.1; HRESIMS  $m/z$  483.1817 [M + Na]<sup>+</sup> (calcd for C<sub>25</sub>H<sub>32</sub>O<sub>6</sub>SNa<sup>+</sup>, 483.1812).

5,7-Dibenzoyloxy-3,15-dihydroxy-14-oxolathyra-6(17),12*E*-diene (22).

Colorless oil; [ $\alpha$ ]<sub>D</sub><sup>25</sup> +63.00 (*c* 0.3, MeCN); UV (MeCN)  $\lambda_{\max}$  (log  $\epsilon$ ) 272 (4.08), 232 (4.41) nm; IR (KBr)  $\nu_{\max}$  3443, 2926, 1719, 1619, 1452, 1271, 1109, 1069, 1026, 995, 709 cm<sup>-1</sup>; <sup>1</sup>H NMR (CDCl<sub>3</sub>, 400 MHz)  $\delta_{\text{H}}$  6.94 (1H, d,  $J$  = 8.5 Hz, H-12), 5.96 (1H, d,  $J$  = 7.1 Hz, H-5), 5.41 (1H, t,  $J$  = 5.4 Hz, H-7), 5.37 (1H, s, H-17a), 5.26 (1H, s, H-17b), 4.13 (1H, dd,  $J$  = 2.9, 2.9 Hz, H-3), 2.99 (1H, dd,  $J$  = 14.5, 10.1 Hz, H-1a), 2.69 (1H, dd,  $J$  = 7.1, 2.9 Hz, H-4), 2.23 (1H, m, H-2), 2.15 (1H, m, H-8a), 2.03 (1H, m, H-8b), 1.93 (3H, s, H-20), 1.72 (1H, dd,  $J$  = 14.5, 10.0 Hz, H-1b), 1.52 (1H, dd,  $J$  = 10.9, 8.5 Hz, H-11), 1.37 (1H, m, H-9), 1.26 (3H, s, H-19), 1.17 (3H, s, H-18), 1.14 (3H, d,  $J$  = 6.8 Hz, H-16), for 5-*OBz*: 7.82 (2H, m), 7.22 (2H, t,  $J$  = 7.5 Hz), 7.40 (1H, t,  $J$  = 7.5 Hz), 7-*OBz*: 7.78 (2H, m), 7.18 (2H, t,  $J$  = 7.5 Hz), 7.37 (1H, t,  $J$  = 7.5 Hz); <sup>13</sup>C NMR (CDCl<sub>3</sub>, 100 MHz)  $\delta_{\text{C}}$  203.7 (C-14), 145.4 (C-12), 143.0 (C-6), 137.3 (C-13), 116.0 (C-17), 88.6 (C-15), 77.3 (C-3), 77.0 (C-7), 69.3 (C-5), 54.6 (C-4), 48.7 (C-1), 37.8 (C-2), 31.9 (C-9), 30.0 (C-8), 28.4 (C-18), 27.1 (C-11), 24.5 (C-10), 15.9 (C-19), 14.4 (C-16), 13.3 (C-20), for 5-*OBz*: 166.6, 133.1, 129.7 × 2, 129.5, 128.2 × 2; for 7-*OBz*: 165.7, 132.8, 129.4 × 2, 129.2, 128.0 × 2; HRESIMS  $m/z$  581.2517 [M + Na]<sup>+</sup> (calcd for C<sub>34</sub>H<sub>38</sub>O<sub>7</sub>Na<sup>+</sup>, 581.2510).

## 1.6. Preparation of **23** and **31** by reduction of **15** and **14**, respectively

To a solution of **15** (30.0 mg, 0.047 mmol) or **14** (30.0 mg, 0.057 mmol) in MeOH (2 mL) was added NaBH<sub>4</sub> (3.5 mg, 0.093 mmol). The reaction mixture was stirred at rt for 15 min and then quenched by adding excess glacial acetic acid. After removal of the solvent under vacuum, the residue was purified by semi-preparative HPLC (MeCN/H<sub>2</sub>O = 85:15, 3 mL/min) to afford compounds **23** (13.0 mg, *t<sub>R</sub>* 15.5 min) and **31** (9.0 mg, *t<sub>R</sub>* 13.8 min).

5,14-Diacetoxy-3,7-dibenzoyloxy-15-hydroxylathyra-6(17),12*E*-diene (**23**).

Colorless oil; [ $\alpha$ ]<sub>D</sub><sup>25</sup> +60.00 (*c* 0.3, MeCN); UV (MeCN)  $\lambda_{\max}$  (log  $\epsilon$ ) 232 (4.32) nm; IR (KBr)  $\nu_{\max}$  3489, 2925, 1718, 1452, 1373, 1276, 1241, 1110, 1026, 916, 713 cm<sup>-1</sup>; <sup>1</sup>H NMR (CDCl<sub>3</sub>, 400 MHz)  $\delta_{\text{H}}$  5.84 (1H, dd, *J* = 3.2, 3.2 Hz, H-3), 5.80 (1H, brs, H-5), 5.65 (1H, d, *J* = 10.0 Hz, H-12), 5.47 (1H, s, H-14), 5.14 (1H, d, *J* = 8.2 Hz, H-7), 5.10 (1H, s, H-17a), 4.92 (1H, s, H-17b), 2.54 (1H, dd, *J* = 14.3, 9.8 Hz, H-1a), 2.46 (1H, d, *J* = 3.2 Hz, H-4), 2.41 (1H, m, H-2), 2.05 (1H, m, H-8 $\alpha$ ), 1.98 (1H, dd, *J* = 14.3, 9.2 Hz, H-1b), 1.93 (3H, s, H-20), 1.62 (1H, m, H-8 $\beta$ ), 1.37 (1H, t, *J* = 10.0 Hz, H-11), 1.18 (1H, m, H-9; 3H, s, H-19), 1.09 (3H, s, H-18), 1.05 (3H, d, *J* = 6.7 Hz, H-16), for 3-OBz:  $\delta_{\text{H}}$  8.10 (2H, m), 7.47 (2H, m), 7.59 (1H, m); 5-OAc:  $\delta_{\text{H}}$  1.46 (3H, s); 7-OBz:  $\delta_{\text{H}}$  8.10 (2H, m), 7.44 (2H, m), 7.55 (1H, m); 14-OAc:  $\delta_{\text{H}}$  2.14 (3H, s); 15-OH:  $\delta_{\text{H}}$  3.16 (1H, s); <sup>13</sup>C NMR (CDCl<sub>3</sub>, 100 MHz)  $\delta_{\text{C}}$  146.1 (C-6), 132.1 (C-13), 123.8 (C-12), 107.3 (C-17), 82.1 (C-15), 78.8 (C-14), 76.8 (C-3), 75.1 (C-7), 69.8 (C-5), 49.8 (C-4), 48.0 (C-1), 36.1 (C-2), 30.2 (C-8), 29.9 (C-9), 28.6 (C-18), 24.9

(C-11), 22.3 (C-10), 16.6 (C-20), 15.1 (C-19), 14.7 (C-16), for 3-OBz: 165.3, 133.1, 130.0, 129.7 × 2, 128.5 × 2; 5-OAc:  $\delta_{\text{C}}$  170.1, 20.5; 7-OBz:  $\delta_{\text{C}}$  166.1, 132.9, 130.8, 129.6 × 2, 128.4 × 2; 14-OAc:  $\delta_{\text{C}}$  169.8, 20.9; HRESIMS  $m/z$  667.2888 [M + Na]<sup>+</sup> (calcd for C<sub>38</sub>H<sub>44</sub>O<sub>9</sub>Na<sup>+</sup>, 667.2878).

5-Acetoxy-3-benzoyloxy-12,15-epoxylathyra-6(17),13Z-diene (**31**). Colorless crystals; mp 131.4–132.8 °C;  $[\alpha]_{\text{D}}^{25} +81.33$  (*c* 0.3, MeCN); UV (MeCN)  $\lambda_{\text{max}}$  (log  $\epsilon$ ) 232 (4.29) nm; IR (KBr)  $\nu_{\text{max}}$  2925, 1724, 1452, 1371, 1272, 1236, 1112, 712 cm<sup>-1</sup>; <sup>1</sup>H NMR (CDCl<sub>3</sub>, 400 MHz)  $\delta_{\text{H}}$  5.58 (1H, dd, *J* = 4.2, 4.2 Hz, H-3), 5.53 (1H, d, *J* = 11.5 Hz, H-5), 5.41 (1H, brs, H-14), 4.93 (1H, brs, H-12), 4.93 (1H, s, H-17a), 4.89 (1H, s, H-17b), 2.84 (1H, dd, *J* = 11.5, 4.2 Hz, H-4), 2.54 (1H, dd, *J* = 11.5, 5.9 Hz, H-7 $\beta$ ), 2.10 (1H, m, H-1 $\alpha$ ), 2.03 (1H, m, H-2), 1.93 (1H, m, H-7 $\alpha$ ), 1.92 (1H, m, H-8 $\beta$ ), 1.90 (1H, m, H-1 $\beta$ ), 1.84 (1H, m, H-8 $\alpha$ ), 1.69 (3H, s, H-20), 1.14 (3H, s, H-19), 1.05 (3H, s, H-18), 0.91 (3H, d, *J* = 6.3 Hz, H-16), 0.56 (1H, d, *J* = 10.0 Hz, H-11), 0.44 (1H, m, H-9), for 3-OBz:  $\delta_{\text{H}}$  8.05 (2H, m), 7.54 (1H, t, *J* = 7.5 Hz), 7.43 (2H, t, *J* = 7.5 Hz); 5-OAc:  $\delta_{\text{H}}$  1.87 (3H, s); <sup>13</sup>C NMR (CDCl<sub>3</sub>, 100 MHz)  $\delta_{\text{C}}$  144.5 (C-6), 135.6 (C-13), 129.2 (C-14), 114.1 (C-17), 94.4 (C-15), 84.5 (C-12), 78.4 (C-3), 68.7 (C-5), 52.9 (C-4), 47.9 (C-1), 38.3 (C-7), 36.4 (C-2), 29.2 (C-9), 28.8 (C-18), 27.1 (C-11), 22.7 (C-8), 15.4 (C-19), 14.8 (C-10), 13.7 (C-16), 12.5 (C-20), for 3-OBz: 166.1, 132.7, 130.4, 129.6 × 2, 128.3 × 2; 5-OAc:  $\delta_{\text{C}}$  170.0, 21.2; HRESIMS  $m/z$  487.2454 [M + Na]<sup>+</sup> (calcd for C<sub>29</sub>H<sub>36</sub>O<sub>5</sub>Na<sup>+</sup>, 487.2455).

#### 1.7. Preparation of **24** and **25** by epoxidation of **15**

To a stirred solution of **15** (80.0 mg, 0.125 mmol) in CH<sub>2</sub>Cl<sub>2</sub> (2 mL) was added

*m*-CPBA (24.1 mg, 0.150 mmol) at 60 °C for 1 h. After that, excess saturated NaHCO<sub>3</sub> solution was added to the reaction mixture for another 10 min. The reaction mixture was washed with H<sub>2</sub>O and extracted with EtOAc. After removal of the solvent under vacuum, the residue was purified with silica gel flash column chromatography (PE:EtOAc = 15:1) and followed by semi-preparative HPLC (MeCN/H<sub>2</sub>O = 80:20, 3 mL/min) to afford **24** (22.4 mg, *t<sub>R</sub>* 11.7 min) and **25** (27.6 mg, *t<sub>R</sub>* 14.1 min).

5,15-Diacetoxy-3,7-dibenzoyloxy-6,17)-12,13-diepoxy-14-oxolathyra (24).

White powder;  $[\alpha]_D^{25} +76.33$  (*c* 0.3, MeCN); UV (MeCN)  $\lambda_{\max}$  (log  $\epsilon$ ) 233 (4.46) nm; IR (KBr)  $\nu_{\max}$  2922, 1718, 1458, 1375, 1276, 1239, 1113, 714 cm<sup>-1</sup>; <sup>1</sup>H NMR (CDCl<sub>3</sub>, 400 MHz)  $\delta_H$  5.98 (1H, m, H-3), 5.40 (1H, s, H-5), 5.30 (1H, d, *J* = 8.2 Hz, H-7), 3.50 (1H, brs, H-4), 3.12 (1H, d, *J* = 9.8 Hz, H-12), 3.02 (1H, d, *J* = 4.5 Hz, H-17a), 2.96 (1H, dd, *J* = 15.4, 8.6 Hz, H-1 $\alpha$ ), 2.66 (1H, m, H-2), 2.64 (1H, d, *J* = 4.5 Hz, H-17b), 2.48 (1H, dd, *J* = 15.4, 11.3 Hz, H-1 $\beta$ ), 2.19 (1H, m, H-8 $\alpha$ ), 1.85 (3H, s, H-20), 1.82 (1H, m, H-8 $\beta$ ), 1.30 (3H, s, H-19), 1.13 (3H, s, H-18), 1.12 (1H, m, H-9), 1.10 (3H, d, *J* = 6.6 Hz, H-16), 0.46 (1H, t, *J* = 9.8 Hz, H-11), for 3-OBz:  $\delta_H$  8.04 (2H, d, *J* = 7.5 Hz), 7.58 (1H, t, *J* = 7.5 Hz), 7.44 (2H, t, *J* = 7.5 Hz); 5-OAc:  $\delta_H$  1.33 (3H, s); 7-OBz:  $\delta_H$  8.08 (2H, d, *J* = 7.5 Hz), 7.63 (1H, t, *J* = 7.5 Hz), 7.49 (2H, t, *J* = 7.5 Hz); 15-OAc:  $\delta_H$  2.08 (3H, s); <sup>13</sup>C NMR (CDCl<sub>3</sub>, 100 MHz)  $\delta_C$  201.3 (C-14), 92.3 (C-15), 76.2 (C-3), 72.9 (C-7), 65.5 (C-5), 62.7 (C-13), 62.5 (C-12), 60.4 (C-6), 50.4 (C-4), 46.8 (C-17), 44.4 (C-1), 37.9 (C-2), 28.4 (C-18), 26.8 (C-9), 25.3 (C-8), 22.8 (C-11), 21.5 (C-10), 15.0 (C-19 and 20), 13.9 (C-16), for 3-OBz: 165.5, 133.4, 130.1, 129.5  $\times$  2, 128.4  $\times$  2; 5-OAc:  $\delta_C$  168.7, 19.7; 7-OBz:  $\delta_C$  166.7, 133.8, 129.9  $\times$  2, 128.8, 128.6  $\times$  2;

15-OAc:  $\delta_{\text{C}}$  169.7, 21.1; HRESIMS  $m/z$  697.2608  $[\text{M} + \text{Na}]^+$  (calcd for  $\text{C}_{38}\text{H}_{42}\text{O}_{11}\text{Na}^+$ , 697.2619).

5,15-Diacetoxy-3,7-dibenzoyloxy-12,13-epoxy-14-oxolathyra-6(17)-ene (25).

White powder;  $[\alpha]_{\text{D}}^{25} +61.33$  ( $c$  0.3, MeCN); UV (MeCN)  $\lambda_{\text{max}}$  ( $\log \epsilon$ ) 232 (4.30) nm; IR (KBr)  $\nu_{\text{max}}$  2926, 1718, 1453, 1371, 1275, 1111, 1068, 1026, 714  $\text{cm}^{-1}$ ;  $^1\text{H}$  NMR ( $\text{CDCl}_3$ , 500 MHz)  $\delta_{\text{H}}$  5.84 (1H, brs, H-3), 5.79 (1H, brs, H-5), 5.44 (1H, t,  $J = 5.2$  Hz, H-7), 5.34 (1H, s, H-17a), 5.10 (1H, s, H-17b), 3.25 (1H, brs, H-4), 3.15 (1H, d,  $J = 9.5$  Hz, H-12), 2.90 (1H, dd,  $J = 15.2, 9.0$  Hz, H-1 $\alpha$ ), 2.49 (1H, m, H-2), 2.29 (1H, dd,  $J = 15.2, 11.9$  Hz, H-1 $\beta$ ), 2.22 (1H, m, H-8 $\alpha$ ), 2.01 (1H, m, H-8 $\beta$ ), 1.69 (3H, s, H-20), 1.27 (3H, s, H-19), 1.14 (3H, s, H-18), 1.13 (1H, m, H-9), 1.02 (3H, d,  $J = 6.5$  Hz, H-16), 0.49 (1H, d,  $J = 9.5$  Hz, H-11), for 3-OBz and 7-OBz:  $\delta_{\text{H}}$  8.09 (2H, d,  $J = 7.3$  Hz), 8.06 (2H, d,  $J = 7.3$  Hz), 7.58 (2H, t,  $J = 7.3$  Hz), 7.45 (4H, m); 5-OAc:  $\delta_{\text{H}}$  1.31 (3H, s); 15-OAc:  $\delta_{\text{H}}$  2.13 (3H, s);  $^{13}\text{C}$  NMR ( $\text{CDCl}_3$ , 125 MHz)  $\delta_{\text{C}}$  204.0 (C-14), 142.8 (C-6), 113.2 (C-17), 91.2 (C-15), 77.0 (C-3 and C-7), 67.8 (C-5), 63.8 (C-13), 61.8 (C-12), 52.4 (C-4), 46.4 (C-1), 37.1 (C-2), 28.6 (C-8), 28.4 (C-18), 27.3 (C-9), 22.6 (C-11), 20.5 (C-10), 15.5 (C-19), 14.9 (C-20), 14.1 (C-16), for 3-OBz and 7-OBz: 166.1, 165.5, 133.4, 133.1, 130.3  $\times$  2, 129.7  $\times$  2, 129.6  $\times$  2, 128.5  $\times$  2, 128.3  $\times$  2; 5-OAc:  $\delta_{\text{C}}$  168.9, 20.3; 15-OAc:  $\delta_{\text{C}}$  169.8, 21.2; HRESIMS  $m/z$  681.2668  $[\text{M} + \text{Na}]^+$  (calcd for  $\text{C}_{38}\text{H}_{42}\text{O}_{10}\text{Na}^+$ , 681.2670).

#### 1.8. Preparation of 26 by hydrogenation of 15

To a stirred solution of 15 (80.0 mg, 0.125 mmol) in EtOAc (2 mL) was added 10% Pd/C under an atmosphere of hydrogen at 50 °C for 24 h. After that, the reaction

mixture was filtered and evaporated to dryness. The obtained residue was purified with silica gel flash column chromatography (PE:EtOAc = 30:1) and followed by semi-preparative HPLC (MeCN/H<sub>2</sub>O = 80:20, 3 mL/min) to afford **26** (18.6 mg, *t<sub>R</sub>* 15.3 min).

5,15-Diacetoxy-3,7-dibenzoyloxy-14-oxolathyra-6(17)-ene (**26**). Colorless crystals; mp 146.7–147.9 °C;  $[\alpha]_D^{25} +49.67$  (*c* 0.3, MeCN); UV (MeCN)  $\lambda_{\max}$  (log  $\epsilon$ ) 232 (4.29) nm; IR (KBr)  $\nu_{\max}$  2924, 1720, 1455, 1370, 1275, 1231, 1111, 712 cm<sup>-1</sup>; <sup>1</sup>H NMR (CDCl<sub>3</sub>, 400 MHz)  $\delta_H$  5.64 (1H, dd, *J* = 3.2, 3.2 Hz, H-3), 5.39 (1H, d, *J* = 11.0 Hz, H-5), 5.14 (1H, d, *J* = 6.1 Hz, H-7), 3.41 (1H, dd, *J* = 11.0, 3.2 Hz, H-4), 3.25 (1H, m, H-13), 2.61 (1H, dd, *J* = 14.1, 6.8 Hz, H-1 $\alpha$ ), 2.40 (1H, m, H-2), 2.13 (1H, dd, *J* = 14.1, 14.1 Hz, H-1 $\beta$ ), 1.81 (1H, brd, *J* = 15.0 Hz, H-8 $\alpha$ ), 1.69 (1H, m, H-6), 1.62 (1H, m, H-12 $\alpha$ ), 1.43 (1H, m, H-12 $\beta$ ), 1.36 (1H, m, H-8 $\beta$ ), 1.27 (6H, d, *J* = 7.0 Hz, H-17 and 20), 1.04 (3H, s, H-18), 0.99 (1H, m, H-11), 0.92 (1H, m, H-9), 0.90 (3H, d, *J* = 6.6 Hz, H-16), 0.78 (3H, s, H-19), for 3-OBz and 7-OBz:  $\delta_H$  7.99 (2H, d, *J* = 7.5 Hz), 7.91 (2H, d, *J* = 7.5 Hz), 7.53 (2H, m), 7.41 (4H, m); 5-OAc:  $\delta_H$  1.40 (3H, s); 15-OAc:  $\delta_H$  2.30 (3H, s); <sup>13</sup>C NMR (CDCl<sub>3</sub>, 100 MHz)  $\delta_C$  217.2 (C-14), 93.6 (C-15), 78.2 (C-3), 72.8 (C-7), 71.7 (C-5), 56.3 (C-4), 48.7 (C-1), 39.3 (C-6), 38.4 (C-2), 38.0 (C-13), 30.1 (C-8), 29.0 (C-12), 28.7 (C-18), 25.6 (C-10), 20.0 (C-20), 19.4 (C-11), 16.4 (C-10), 15.2 (C-19), 13.3 (C-11), 12.6 (C-17), for 3-OBz and 7-OBz: 165.9, 165.5, 133.0, 132.9, 130.7, 130.3, 129.4  $\times$  2, 129.3  $\times$  2, 128.4  $\times$  2, 128.3  $\times$  2; 5-OAc:  $\delta_C$  170.3, 20.5; 15-OAc:  $\delta_C$  170.0, 22.1; HRESIMS *m/z* 669.3028 [M + Na]<sup>+</sup> (calcd for C<sub>38</sub>H<sub>46</sub>O<sub>9</sub>Na<sup>+</sup>, 669.3034).

### 1.9. Preparation of **28** by oxidation of **27**

To a stirred solution of **27** (25.0 mg, 0.075 mmol) in CH<sub>2</sub>Cl<sub>2</sub> (2 mL) was added Dess-Martin periodinane reagent (31.7 mg, 0.075 mmol) at rt for 3 h. After that, the reaction mixture was filtered and evaporated to dryness. The obtained residue was purified with silica gel flash column chromatography (PE:EtOAc = 15:1) to afford **28** (17.3 mg).

3,15-Dihydroxy-5,14-dioxolathyra-6(17),12*E*-diene (**28**). White powder;  $[\alpha]_D^{25} +146.00$  (*c* 0.3, MeCN); UV (MeCN)  $\lambda_{\max}$  (log  $\epsilon$ ) 248 (4.21) nm; IR (KBr)  $\nu_{\max}$  3452, 2926, 1642, 1453, 1379, 1260, 1230, 1150, 1113, 1057, 1000, 904, 861 cm<sup>-1</sup>; <sup>1</sup>H NMR (CDCl<sub>3</sub>, 400 MHz)  $\delta_H$  7.02 (1H, dd, *J* = 11.6, 1.0 Hz, H-12), 5.80 (1H, s, H-17a), 5.61 (1H, s, H-17b), 4.24 (1H, dd, *J* = 2.9, 2.9 Hz, H-3), 3.35 (1H, dd, *J* = 13.5, 8.5 Hz, H-1a; 1H, d, *J* = 2.9 Hz, H-4), 2.97 (1H, dd, *J* = 13.7, 5.7 Hz, H-7a), 1.99 (2H, m, H-7b and 8a), 1.90 (1H, m, H-2), 1.74 (3H, d, *J* = 1.0 Hz, H-20), 1.63 (1H, dd, *J* = 13.5, 11.7 Hz, H-1b), 1.55 (1H, m, H-8b), 1.39 (1H, dd, *J* = 11.6, 8.2 Hz, H-11), 1.14 (3H, s, H-18), 1.11 (3H, d, *J* = 6.7 Hz, H-16), 1.09 (1H, m, H-9), 1.01 (3H, s, H-19), for 3-OH:  $\delta_H$  4.63 (1H, brs), 15-OH:  $\delta_H$  3.43 (1H, s); <sup>13</sup>C NMR (CDCl<sub>3</sub>, 100 MHz)  $\delta_C$  203.9 (C-5), 197.2 (C-14), 151.1 (C-12), 149.9 (C-6), 133.3 (C-13), 127.3 (C-17), 90.7 (C-15), 79.4 (C-3), 56.1 (C-4), 47.1 (C-1), 38.8 (C-2), 35.3 (C-9), 32.7 (C-7), 29.0 (C-11 and 18), 25.4 (C-10), 22.0 (C-8), 16.1 (C-19), 13.3 (C-16), 12.6 (C-20); HRESIMS *m/z* 355.1873 [M + Na]<sup>+</sup> (calcd for C<sub>20</sub>H<sub>28</sub>O<sub>4</sub>Na<sup>+</sup>, 355.1880).

### 1.10. Preparation of **29** and **30** by hydrogenation of **14**

A total of **14** (80.0 mg, 0.153 mmol) was prepared following the same procedure used in *section 4.8*. The obtained residue was purified with silica gel flash column chromatography (PE:EtOAc = 35:1) and followed by semi-preparative HPLC (MeCN/H<sub>2</sub>O = 80:20, 3 mL/min) to afford **29** (19.2 mg, *t<sub>R</sub>* 15.3 min) and **30** (16.8 mg, *t<sub>R</sub>* 15.9 min).

5,15-Diacetoxy-3-benzoyloxy-14-oxolathyra-6(17)-ene (**29**). White powder;  $[\alpha]_D^{25}$  -21.67 (*c* 0.3, MeCN); UV (MeCN)  $\lambda_{\max}$  (log  $\epsilon$ ) 232 (4.32) nm; IR (KBr)  $\nu_{\max}$  2924, 1742, 1719, 1453, 1370, 1272, 1231, 1111, 1025, 735, 710 cm<sup>-1</sup>; <sup>1</sup>H NMR (CDCl<sub>3</sub>, 400 MHz)  $\delta_H$  5.82 (1H, d, *J* = 9.5 Hz, H-5), 5.76 (1H, dd, *J* = 4.4, 4.4 Hz, H-3), 5.41 (1H, s, H-17a), 5.15 (1H, s, H-17b), 3.31 (1H, dd, *J* = 11.7, 7.2 Hz, H-13), 3.17 (1H, dd, *J* = 9.5, 4.4 Hz, H-4), 2.84 (1H, dd, *J* = 11.8, 4.8 Hz, H-1 $\alpha$ ), 2.35 (1H, m, H-7 $\beta$ ), 2.10 (1H, m, H-2), 2.07 (1H, m, H-1 $\beta$ ), 1.88 (2H, m, H-7 $\alpha$  and 8 $\alpha$ ), 1.76 (1H, m, H-12 $\alpha$ ), 1.27 (1H, m H-12 $\beta$ ), 1.02 (3H, d, *J* = 6.7 Hz, H-20; 1H, m, H-8 $\beta$ ), 0.99 (3H, s, H-18), 0.93 (3H, d, *J* = 6.2 Hz, H-16), 0.83 (3H, s, H-19), 0.50 (1H, m, H-11), 0.34 (1H, m, H-9); for 3-OBz:  $\delta_H$  8.03 (2H, m), 7.56 (1H, t, *J* = 7.5 Hz), 7.44 (2H, t, *J* = 7.5 Hz); 5-OAc:  $\delta_H$  1.81 (3H, s); 15-OAc:  $\delta_H$  2.18 (3H, s); <sup>13</sup>C NMR (CDCl<sub>3</sub>, 100 MHz)  $\delta_C$  211.8 (C-14), 147.2 (C-6), 117.7 (C-17), 92.1 (C-15), 78.3 (C-3), 73.6 (C-5), 50.6 (C-4), 43.9 (C-1), 38.4 (C-13), 37.3 (C-2), 30.4 (C-7), 28.8 (C-18), 28.5 (C-12), 28.4 (C-9), 22.6 (C-8), 21.8 (C-11), 18.8 (C-20), 17.3 (C-10), 15.2 (C-19), 13.2 (C-16), for 3-OBz: 165.9, 133.0, 130.0, 129.5  $\times$  2, 128.4  $\times$  2; 5-OAc:  $\delta_C$  169.2, 20.9; 15-OAc:  $\delta_C$  169.7, 21.7; HRESIMS *m/z* 547.2653 [M + Na]<sup>+</sup> (calcd for C<sub>31</sub>H<sub>40</sub>O<sub>7</sub>Na<sup>+</sup>, 547.2666).



5,15-Diacetoxy-3-benzoyloxy-14-oxolathyra-12*E*-ene (**30**). Colorless oil;  $[\alpha]^{25}_{\text{D}} +51.33$  ( $c$  0.3, MeCN); UV (MeCN)  $\lambda_{\text{max}}$  (log  $\epsilon$ ) 273 (4.54), 232 (4.47) nm; IR (KBr)  $\nu_{\text{max}}$  2926, 1738, 1652, 1621, 1453, 1368, 1271, 1233, 1114, 1028, 712  $\text{cm}^{-1}$ ;  $^1\text{H}$  NMR ( $\text{CDCl}_3$ , 400 MHz)  $\delta_{\text{H}}$  6.76 (1H, d,  $J = 11.5$  Hz, H-12), 6.02 (1H, d,  $J = 7.7$  Hz, H-5), 5.69 (1H, dd,  $J = 3.4, 3.4$  Hz, H-3), 3.47 (1H, dd,  $J = 13.9, 7.7$  Hz, H-1 $\alpha$ ), 2.28 (1H, dd,  $J = 7.7, 3.4$  Hz, H-4), 2.26 (1H, m, H-2), 1.87 (3H, br. s, H-20), 1.82 (1H, m, H-8 $\alpha$ ), 1.75 (1H, m, H-8 $\beta$ ), 1.62 (1H, m, H-6), 1.61 (1H, m, H-1 $\beta$ ), 1.49 (1H, dd,  $J = 11.5, 8.3$  Hz, H-11), 1.21 (3H, s, H-19), 1.19 (3H, s, H-18; 2H, m, H-7 $\alpha$  and  $\beta$ ), 1.11 (1H, ddd,  $J = 11.5, 8.3, 4.1$  Hz, H-9), 0.92 (3H, d,  $J = 6.7$  Hz, H-16), 0.81 (3H, d,  $J = 6.7$  Hz, H-17), for 3-OBz:  $\delta_{\text{H}}$  7.99 (2H, m), 7.57 (1H, t,  $J = 7.5$  Hz), 7.43 (2H, t,  $J = 7.5$  Hz); 5-OAc:  $\delta_{\text{H}}$  1.65 (3H, s); 15-OAc:  $\delta_{\text{H}}$  2.22 (3H, s);  $^{13}\text{C}$  NMR ( $\text{CDCl}_3$ , 100 MHz)  $\delta_{\text{C}}$  196.8 (C-14), 146.1 (C-12), 133.9 (C-13), 92.0 (C-15), 80.8 (C-3), 66.4 (C-5), 54.7 (C-4), 48.0 (C-1), 38.5 (C-2), 36.6 (C-9), 35.8 (C-6), 32.8 (C-7), 29.2 (C-18), 29.1 (C-11), 25.4 (C-10), 20.1 (C-8), 16.8 (C-19), 14.8 (C-17), 14.0 (C-16), 12.6 (C-20), for 3-OBz: 166.0, 133.1, 130.1, 129.5  $\times$  2, 128.5  $\times$  2; 5-OAc:  $\delta_{\text{C}}$  170.2, 20.5; 15-OAc:  $\delta_{\text{C}}$  169.8, 21.7; HRESIMS  $m/z$  547.2662  $[\text{M} + \text{Na}]^+$  (calcd for  $\text{C}_{31}\text{H}_{40}\text{O}_7\text{Na}^+$ , 547.2666).

#### 1.11. Preparation of **32–34** by cyclopropane ring-opening of **14**

To a stirred solution of **14** (150.0 mg, 0.287 mmol) in MeOH (2 mL) was added  $\text{NaBH}_4$  (13.0 mg, 0.344 mmol) at rt for 15 min, and followed treated with 10% hydrochloric acid at 60 °C for 30 min. After that, the reaction mixture was evaporated to dryness. The obtained residue was purified with silica gel flash column

chromatography (PE:EtOAc = 40:1) and followed by semi-preparative HPLC (MeCN/H<sub>2</sub>O = 75:25, 3 mL/min) to afford **32** (21.2 mg, *t<sub>R</sub>* 15.9 min), **33** (13.8 mg, *t<sub>R</sub>* 15.4 min) and **34** (15.8 mg, *t<sub>R</sub>* 13.6 min).

5-Acetoxy-3-benzoyloxy-15-hydroxy-10,11-*secolathyra*-6(17),10(18),11*E*,13*Z*-tetraene (**32**). White powder;  $[\alpha]_D^{25} +43.67$  (*c* 0.3, MeCN); UV (MeCN)  $\lambda_{\max}$  (log  $\epsilon$ ) 232 (4.26) nm; IR (KBr)  $\nu_{\max}$  3476, 2926, 1718, 1452, 1371, 1275, 1114, 1026, 900, 712 cm<sup>-1</sup>; <sup>1</sup>H NMR (CDCl<sub>3</sub>, 400 MHz)  $\delta_H$  6.24 (1H, d, *J* = 16.2 Hz, H-12), 5.85 (1H, d, *J* = 7.0 Hz, H-5), 5.71 (1H, dd, *J* = 4.5, 4.5 Hz, H-3), 5.59 (1H, dd, *J* = 16.2, 7.8 Hz, H-11), 5.48 (1H, s, H-14), 5.04 (1H, s, H-17a), 4.96 (1H, s, H-17b), 4.76 (1H, s, H-18a), 4.75 (1H, s, H-18b), 3.20 (1H, dd, *J* = 7.0, 4.5 Hz, H-4), 2.66 (1H, ddd, *J* = 12.0, 7.8, 3.0 Hz, H-9), 2.34 (1H, m, H-7 $\alpha$ ), 2.08 (2H, m, H-1 $\alpha$  and  $\beta$ ), 2.07 (1H, m, H-2), 1.97 (1H, m, H-8 $\alpha$ ), 1.95 (1H, m, H-7 $\beta$ ), 1.83 (3H, s, H-20), 1.75 (1H, m, H-8 $\beta$ ), 1.72 (3H, s, H-19), 0.94 (3H, d, *J* = 5.5 Hz, H-16), for 3-OBz:  $\delta_H$  8.06 (2H, m), 7.57 (1H, t, *J* = 7.5 Hz), 7.45 (2H, t, *J* = 7.5 Hz); 5-OAc:  $\delta_H$  1.77 (3H, s); 15-OH: 2.40 (1H, brs); <sup>13</sup>C NMR (CDCl<sub>3</sub>, 100 MHz)  $\delta_C$  147.6 (C-10), 147.2 (C-6), 134.6 (C-13), 134.4 (C-11), 133.9 (C-14), 129.7 (C-12), 113.5 (C-17), 110.2 (C-18), 80.0 (C-15), 78.9 (C-3), 73.6 (C-5), 52.5 (C-9), 51.8 (C-1), 49.4 (C-4), 35.6 (C-2), 30.2 (C-7), 29.5 (C-8), 23.8 (C-20), 20.9 (C-19), 13.7 (C-16), for 3-OBz: 165.8, 133.0, 130.1, 129.6  $\times$  2, 128.4  $\times$  2; 5-OAc:  $\delta_C$  169.7, 21.0; HRESIMS *m/z* 487.2445 [M + Na]<sup>+</sup> (calcd for C<sub>29</sub>H<sub>36</sub>O<sub>5</sub>Na<sup>+</sup>, 487.2455).

5-Acetoxy-3-benzoyloxy-15-hydroxy-10-methoxy-10,11-*secolathyra*-6(17),11*E*,13*Z*-triene (**33**). White powder;  $[\alpha]_D^{25} +58.67$  (*c* 0.3, MeCN); UV (MeCN)  $\lambda_{\max}$  (log  $\epsilon$ )

232 (4.30) nm; IR (KBr)  $\nu_{\max}$  3450, 2926, 1717, 1453, 1368, 1275, 1179, 1114, 1071, 907, 712  $\text{cm}^{-1}$ ;  $^1\text{H}$  NMR ( $\text{CDCl}_3$ , 400 MHz)  $\delta_{\text{H}}$  6.19 (1H, d,  $J = 16.1$  Hz, H-12), 5.84 (1H, d,  $J = 6.2$  Hz, H-5), 5.70 (1H, dd,  $J = 4.0, 4.0$  Hz, H-3), 5.58 (1H, dd,  $J = 16.1, 8.6$  Hz, H-11), 5.47 (1H, s, H-14), 4.93 (1H, s, H-17a), 4.89 (1H, s, H-17b), 3.19 (1H, m, H-4), 2.34 (1H, m, H-7 $\beta$ ), 2.17 (1H, m, H-9), 2.12 (1H, m, H-1 $\alpha$ ), 2.07 (1H, m, H-2), 2.05 (1H, m, H-1 $\beta$ ), 2.01 (1H, m, H-8 $\alpha$ ), 1.84 (1H, m, H-7 $\alpha$ ), 1.82 (3H, s, H-20), 1.50 (1H, m, H-8 $\beta$ ), 1.12 (3H, s H-19), 1.11 (3H, s H-18), 0.94 (3H, d,  $J = 5.7$  Hz, H-16), for 3-OBz:  $\delta_{\text{H}}$  8.06 (2H, m), 7.56 (1H, t,  $J = 7.5$  Hz), 7.44 (2H, t,  $J = 7.5$  Hz); 5-OAc:  $\delta_{\text{H}}$  1.76 (3H, s); 10-OMe:  $\delta_{\text{H}}$  3.19 (3H, s); 15-OH:  $\delta_{\text{H}}$  2.53 (1H, s);  $^{13}\text{C}$  NMR ( $\text{CDCl}_3$ , 100 MHz)  $\delta_{\text{C}}$  147.1 (C-6), 134.2 (C-13), 133.3 (C-11), 133.0 (C-14), 130.7 (C-12), 112.7 (C-17), 80.3 (C-15), 78.9 (C-3), 76.3 (C-10), 73.2 (C-5), 54.0 (C-9), 51.8 (C-1), 49.0 (C-4), 35.6 (C-2), 30.6 (C-7), 24.8 (C-8), 24.5 (C-20), 23.5 (C-18), 21.9 (C-19), 13.9 (C-16), for 3-OBz: 165.8, 133.0, 130.1, 129.6  $\times$  2, 128.4  $\times$  2; 5-OAc:  $\delta_{\text{C}}$  169.7, 21.0; 10-OMe:  $\delta_{\text{C}}$  48.9; HRESIMS  $m/z$  519.2710 [ $\text{M} + \text{Na}$ ] $^+$  (calcd for  $\text{C}_{30}\text{H}_{40}\text{O}_6\text{Na}^+$ , 519.2717).

5-Acetoxy-3-benzoyloxy-10,15-dihydroxy-10,11-*secolathyra*-6(17),11*E*,13*Z*-trienone (**34**). White powder;  $[\alpha]_{\text{D}}^{25} +57.00$  ( $c$  0.3, MeCN); UV (MeCN)  $\lambda_{\max}$  ( $\log \epsilon$ ) 232 (4.27) nm; IR (KBr)  $\nu_{\max}$  3447, 2965, 1716, 1452, 1371, 1277, 1118, 1026, 908, 713  $\text{cm}^{-1}$ ;  $^1\text{H}$  NMR ( $\text{CDCl}_3$ , 400 MHz)  $\delta_{\text{H}}$  6.23 (1H, d,  $J = 16.1$  Hz, H-12), 5.84 (1H, d,  $J = 6.1$  Hz, H-5), 5.71 (1H, dd,  $J = 4.0, 4.0$  Hz, H-3), 5.61 (1H, dd,  $J = 16.1, 8.7$  Hz, H-11), 5.47 (1H, s, H-14), 4.91 (1H, s, H-17a), 4.86 (1H, s, H-17b), 3.19 (1H, m, H-4), 2.34 (1H, dd,  $J = 13.3, 10.0$  Hz, H-7 $\beta$ ), 2.13 (1H, m, H-1 $\alpha$ ), 2.07 (1H, m, H-2), 2.03

(1H, m, H-9; 1H, m, H-1 $\beta$ ; 1H, m, H-8 $\alpha$ ), 1.85 (1H, m, H-7 $\alpha$ ), 1.82 (3H, s, H-20), 1.55 (1H, m, H-8 $\beta$ ), 1.19 (6H, s, H-18 and H-19), 0.93 (3H, d,  $J = 5.8$  Hz, H-16), for 3-OBz:  $\delta_{\text{H}}$  8.05 (2H, m), 7.56 (1H, t,  $J = 7.5$  Hz), 7.44 (2H, t,  $J = 7.5$  Hz); 5-OAc:  $\delta_{\text{H}}$  1.76 (3H, s); 15-OH:  $\delta_{\text{H}}$  2.55 (1H, brs);  $^{13}\text{C}$  NMR ( $\text{CDCl}_3$ , 100 MHz)  $\delta_{\text{C}}$  146.8 (C-6), 134.2 (C-13), 133.0 (C-11 and 14), 131.8 (C-12), 112.6 (C-17), 80.3 (C-15), 78.9 (C-3), 72.9 (C-5), 72.2 (C-10), 56.9 (C-9), 51.9 (C-1), 48.9 (C-4), 35.5 (C-2), 30.8 (C-7), 28.1 (C-18), 26.9 (C-19), 25.2 (C-8), 24.7 (C-20), 13.9 (C-16), for 3-OBz: 165.8, 133.0, 130.0, 129.6  $\times$  2, 128.4  $\times$  2; 5-OAc:  $\delta_{\text{C}}$  169.8, 21.0; HRESIMS  $m/z$  505.2568 [ $\text{M} + \text{Na}$ ] $^+$  (calcd for  $\text{C}_{29}\text{H}_{38}\text{O}_6\text{Na}^+$ , 505.2561).

#### 1.12. X-ray crystallographic analysis

Compound **26** was recrystallized from MeCN/H<sub>2</sub>O (20:1) to afford colorless needles.  $\text{C}_{38}\text{H}_{46}\text{O}_9 \cdot 2\text{MeCN}$  ( $M = 728.85$  g/mol): orthorhombic, space group  $\text{P}2_12_12_1$ ,  $a = 8.76640(10)$  Å,  $b = 9.56870(10)$  Å,  $c = 47.6317(6)$  Å,  $V = 3995.49(8)$  Å<sup>3</sup>,  $Z = 4$ ,  $T = 100$  K,  $\mu$  (Cu  $\text{K}\alpha$ ) =  $0.690$  mm<sup>-1</sup>,  $D_{\text{calc}} = 1.212$  g/cm<sup>3</sup>, 39757 reflections measured ( $7.424^\circ \leq 2\Theta \leq 153.90^\circ$ ), 8304 unique ( $R_{\text{int}} = 0.0464$ ,  $R_{\text{sigma}} = 0.0327$ ) which were used in all calculations. The final  $R_1$  was 0.0416 ( $I > 2\sigma(I)$ ) and  $wR_2$  was 0.0916 (all data). Flack parameter = 0.02 (6). Crystallographic data for the structure of **26** have been deposited in the Cambridge Crystallographic Data Centre (deposition number: CCDC 2080912).

Compound **30** was recrystallized from petroleum ether/ethanol (20:1) to afford colorless needles.  $\text{C}_{31}\text{H}_{40}\text{O}_7$  ( $M = 524.63$  g/mol): orthorhombic, space group  $\text{P}2_1$ ,  $a =$

9.9964(2) Å,  $b = 8.27010(10)$  Å,  $c = 17.4475(3)$  Å,  $V = 1408.61(4)$  Å<sup>3</sup>,  $Z = 2$ ,  $T = 100$  K,  $\mu$  (Cu K $\alpha$ ) = 0.702 mm<sup>-1</sup>,  $D_{\text{calc}} = 1.237$  g/cm<sup>3</sup>, 27407 reflections measured ( $5.186^\circ \leq 2\Theta \leq 153.572^\circ$ ), 5740 unique ( $R_{\text{int}} = 0.0533$ ,  $R_{\text{sigma}} = 0.0353$ ) which were used in all calculations. The final  $R_1$  was 0.0384 ( $I > 2\sigma(I)$ ) and  $wR_2$  was 0.1059 (all data). Flack parameter = -0.13 (8). Crystallographic data for the structure of **30** have been deposited in the Cambridge Crystallographic Data Centre (deposition number: CCDC 2080915).

Compound **31** was recrystallized from MeCN/H<sub>2</sub>O (20:1) to afford colorless needles. C<sub>29</sub>H<sub>36</sub>O<sub>5</sub> ( $M = 464.58$  g/mol): orthorhombic, space group P2<sub>1</sub>2<sub>1</sub>2<sub>1</sub>,  $a = 10.50870(10)$  Å,  $b = 13.93090(10)$  Å,  $c = 17.2371(3)$  Å,  $V = 2523.44(4)$  Å<sup>3</sup>,  $Z = 4$ ,  $T = 100$  K,  $\mu$  (Cu K $\alpha$ ) = 0.658 mm<sup>-1</sup>,  $D_{\text{calc}} = 1.223$  g/cm<sup>3</sup>, 25420 reflections measured ( $8.16^\circ \leq 2\Theta \leq 154.202^\circ$ ), 5247 unique ( $R_{\text{int}} = 0.0546$ ,  $R_{\text{sigma}} = 0.0353$ ) which were used in all calculations. The final  $R_1$  was 0.0415 ( $I > 2\sigma(I)$ ) and  $wR_2$  was 0.1068 (all data). Flack parameter = 0.00 (10). Crystallographic data for the structure of **31** have been deposited in the Cambridge Crystallographic Data Centre (deposition number: CCDC 2080917).

These data can be obtained free of charge via [www.ccdc.cam.ac.uk/data\\_request/cif](http://www.ccdc.cam.ac.uk/data_request/cif), or by emailing [data\\_request@ccdc.cam.ac.uk](mailto:data_request@ccdc.cam.ac.uk), or by contacting The Cambridge Crystallographic Data Centre, 12 Union Road, Cambridge CB2 1EZ, UK; fax: +44 1223 336033

### 1.13. Cell Culture

HEK293T cells, purchased from ATCC, were cultivated in DMEM (Corning, USA) medium supplemented with 10% fetal bovine serum (FBS, Corning, USA) and 1% penicillin/streptomycin (PS, Gibco, USA). Human hepatoma cell line HepaRG (Thermo Fisher Scientific, USA) was cultured to confluence in Williams' E medium (Thermo Fisher Scientific, USA) supplemented with 10% FBS, 1% ITS (Thermo Fisher Scientific, USA), 1% GlutaMAX (Thermo Fisher Scientific, USA), 100U PS and 0.1  $\mu$ M dexamethasone (Sigma-Aldrich, USA) for two weeks. Then HepaRG cells differentiate in medium containing 2% dimethylsulfoxide (DMSO, MP Biomedicals, USA). Cells were all incubated at 37 °C with 5% CO<sub>2</sub>.

#### 1.14. Dual luciferase reporter Assays

Dual-luciferase reporter gene assay was performed as described in our previous reports.<sup>4-6</sup> HEK293T cells were seeded in 96-well plates at a density of  $1.2 \times 10^4$  cells per well without antibiotics. 100 ng pGL3-CYP3A4-XREM-Luc, 50 ng pSG5-hPXR, and 3 ng pGL4.74 [hRluc/TK] control vector were co-transfected into each well using MegaTran 1.0 (Origene, USA) according to the manufacturer's instructions. 6 hours later, the transfection mixtures were replaced by culture medium containing 10  $\mu$ M hPXR positive agonist RIF or the tested compounds. After incubation for 24 h, dual-luciferase activity was measured using a Dual Reporter Assay System (Promega, Madison, WI) in an Amersham Pharmacia Biotech luminometer. *Renilla* activity was measured as normalization to firefly luciferase activity for each well.

#### 1.15. Quantitative reverse-transcription polymerase chain reaction

Trizol reagent was used to purify total RNA from HepaRG according to the manufacturer's instruction (Invitrogen, Grand Island, NY). Approximately 1000 ng RNA was isolated and randomly reverse-transcribed to cDNA with PrimeScript RT reagent kit (Accurate biology, China). RT-qPCR analysis for specific genes was performed using SYBR Premix Ex Taq II kit (Accurate biology, China) in Applied Biosystems 7500 Real-Time PCR System. ACTB of HepaRG was used as normalized control. The gene-specific primer sequences used in the experiment are listed in Table. S1.2.

#### 1.16. Molecular modeling

All the molecular docking studies, including protein preparation, ligand preparation and docking simulation, were performed using MOE2014.0901. Crystal structure of hPXR and RIF complex (PDB ID: 1SKX) was downloaded from RCSB Protein Data Bank (<http://www.rcsb.org/>), with a resolution of 2.8 Å. The forcefield environment was set as default Amber10: EHT, and the LigX module was applied to preprocess the ligand-protein complex. Small molecules (draw by Chemdraw 17.0) were imported into the MOE software and built as a candidate compound library while the force-field parameters set as MMFF94 × default environment. After energy minimizing and optimization, a stochastic conformational search was performed. Each compound can generate up to 1000 conformations. The candidate molecules were docked into the suggested active site using the default induced fit docking protocol and rescoring via London dG and GBVI/WSA dG algorithm.

### 1.17. Statistical Analysis

All the presented data and results were confirmed by at least three independent experiments. The data were presented as means  $\pm$  the standard deviation (S.D.) and analyzed with GraphPad Prism 7.0 software (GraphPad Software, U.S.). Statistical differences between two groups were determined using student-T-test. A value of  $P < 0.05$  was accepted as statistically significant.

### References

- (1) Appendino, G.; Belloro, E.; Tron, G. C.; Jakupovic, J.; Ballero, M. Diterpenoids from *Euphorbia pithyusa* subsp. *cupanii*. *J. Nat. Prod.* 1999, *62*, 1399–1404.
- (2) Cheng, Z.; Wu, Y. Transformation method of lathyrol derivatives and application thereof in preparing antitumor drug. CN107164422A, 2017.
- (3) Narayanan, P.; Röhrli, M.; Zechmeister, K.; Engel, D. W.; Hoppe, W. Structure of 7-hydroxy-lathyrol a further diterpene from *Euphorbia lathyris*. *Tetrahedron. Lett.* 1971, *12*, 1325–1328.
- (4) Zeng, H.; Li, D.; Qin, X.; Chen, P.; Tan, H.; Zeng, X.; Li, X.; Fan, X.; Jiang, Y.; Zhou, Y.; Chen, Y.; Wang, Y.; Huang, M.; Bi, H. Hepatoprotective effects of schisandra sphenanthera extract against lithocholic acid-induced cholestasis in male mice are associated with activation of the pregnane x receptor pathway and promotion of liver regeneration. *Drug. Metab. Dispos.* 2016, *44*, 337–342.



(5) Fan, S.; Liu, C.; Jiang, Y.; Gao, Y.; Chen, Y.; Fu, K.; Yao, X.; Huang, M.; Bi, H. Lignans from *Schisandra sphenanthera* protect against lithocholic acid-induced cholestasis by pregnane X receptor activation in mice. *J. Ethnopharmacol.* 2019, *245*, 112103–112112.

**2. Table S1.**  $^1\text{H}$  and  $^{13}\text{C}$  NMR spectral data of compounds **1–3** in  $\text{CDCl}_3$  ( $J$  in Hz,  $\delta$  in ppm)

| no.        | <b>1<sup>a</sup></b>       |                     | <b>2<sup>b</sup></b>                 |                     | <b>3<sup>a</sup></b>       |                     |
|------------|----------------------------|---------------------|--------------------------------------|---------------------|----------------------------|---------------------|
|            | $\delta_{\text{H}}$ , mult | $\delta_{\text{C}}$ | $\delta_{\text{H}}$ , mult           | $\delta_{\text{C}}$ | $\delta_{\text{H}}$ , mult | $\delta_{\text{C}}$ |
| 1 $\alpha$ | 3.76, dd (14.8, 9.3)       | 44.0                | 3.48, dd (13.6, 9.3)                 | 45.8                | 3.33, dd (14.5, 8.3)       | 47.0                |
| 1 $\beta$  | 1.71, dd (14.8, 10.7)      |                     | 1.46, dd (13.6, 10.0)                |                     | 1.88, dd (14.5, 11.4)      |                     |
| 2          | 2.46, m                    | 38.6                | 2.06, m                              | 38.9                | 2.41, m                    | 37.2                |
| 3          | 5.65, dd (3.8, 3.8)        | 81.1                | 4.06, dd (3.0, 3.0)                  | 80.9                | 5.94, dd (3.8, 3.8)        | 79.4                |
| 4          | 3.02, dd (10.8, 3.8)       | 51.8                | 2.54, dd (10.9, 3.0)                 | 52.5                | 2.81, m                    | 55.8                |
| 5          | 6.59, d (10.8)             | 137.1               | 6.03, d (10.9)                       | 127.1               | 6.08, d (10.2)             | 67.1                |
| 6          |                            | 143.3               |                                      | 138.9               |                            | 147.7               |
| 7 $\alpha$ |                            | 203.7               | 2.15, m                              | 31.9                |                            | 199.9               |
| 7 $\beta$  |                            |                     | 2.49, m                              |                     |                            |                     |
| 8 $\alpha$ | 2.61, dd (12.1, 4.3)       | 36.3                | 2.26, m                              | 28.4                | 2.79, dd (13.8, 7.5)       | 33.7                |
| 8 $\beta$  | 2.95, dd (12.1, 12.1)      |                     | 1.59, m                              |                     | 3.01, dd (13.8, 8.0)       |                     |
| 9          | 1.22, m                    | 31.8                | 1.16, m                              | 34.5                | 1.60, m                    | 31.5                |
| 10         |                            | 24.8                |                                      | 25.1                |                            | 25.4                |
| 11         | 1.51, dd (11.7, 8.4)       | 27.7                | 1.50, dd (11.5, 7.0)                 | 29.7                | 1.56, m                    | 28.1                |
| 12         | 6.70, dd (11.7, 1.0)       | 145.4               | 7.38, d (11.5)                       | 152.1               | 6.43, d (10.7)             | 143.3               |
| 13         |                            | 133.8               |                                      | 132.6               |                            | 136.0               |
| 14         |                            | 193.1               |                                      | 197.2               |                            | 196.2               |
| 15         |                            | 95.6                |                                      | 92.8                |                            | 92.2                |
| 16         | 1.05, d (6.8)              | 14.4                | 1.12, d (6.8)                        | 14.2                | 0.98, d (6.8)              | 14.0                |
| 17         | 4.13, brs                  | 58.0                | a 4.61, d (12.1)<br>b 4.32, d (12.1) | 64.9                | a 6.13, s<br>b 5.77, s     | 128.0               |
| 18         | 1.19, s                    | 28.5                | 1.19, s                              | 29.2                | 1.19, s                    | 28.4                |
| 19         | 1.15, s                    | 16.2                | 1.09, s                              | 16.2                | 1.23, s                    | 15.9                |
| 20         | 1.82, d (1.0)              | 12.5                | 1.86, s                              | 12.5                | 1.77, s                    | 12.8                |
| 5-OAc      |                            |                     |                                      |                     | 1.78, s                    | 20.6                |
|            |                            |                     |                                      |                     |                            | 169.7               |
| 15-OAc     | 2.16, s                    | 21.6                |                                      |                     | 2.22, s                    | 21.8                |
|            |                            | 169.2               |                                      |                     |                            | 169.8               |
| OBz        | 3-                         |                     | 17-                                  |                     | 3-                         |                     |
| C=O        |                            | 165.5               |                                      | 166.5               |                            | 165.8               |
| 1'         |                            | 129.9               |                                      | 130.3               |                            | 129.9               |
| 2',6'      | 8.09, m                    | 129.6               | 7.98, m                              | 129.5               | 8.01, m                    | 129.4               |
| 3',5'      | 7.49, t (7.7)              | 128.6               | 7.41, t (7.8)                        | 128.4               | 7.45, t (7.5)              | 128.5               |
| 4'         | 7.62, m                    | 133.4               | 7.54, t (7.8)                        | 133.0               | 7.58, t (7.5)              | 133.2               |
| 15-OH      |                            |                     | 3.05, brs                            |                     |                            |                     |

<sup>a</sup>Recorded at  $^1\text{H}$  (400 MHz),  $^{13}\text{C}$  NMR (100 MHz); <sup>b</sup>Recorded at  $^1\text{H}$  (500 MHz),  $^{13}\text{C}$  NMR (125 MHz)

**3. Table S2.**  $^1\text{H}$  (400 MHz) and  $^{13}\text{C}$  NMR (100 MHz) spectral data of compounds **4** and **5** in  $\text{CDCl}_3$  ( $J$  in Hz,  $\delta$  in ppm)

| no.        | <b>4</b>                            |                     | <b>5</b>                   |                     |
|------------|-------------------------------------|---------------------|----------------------------|---------------------|
|            | $\delta_{\text{H}}$ , mult          | $\delta_{\text{C}}$ | $\delta_{\text{H}}$ , mult | $\delta_{\text{C}}$ |
| 1 $\alpha$ | 3.48, dd (14.3, 8.4)                | 48.4                | 3.31, dd (14.4, 10.2)      | 51.0                |
| 1 $\beta$  | 1.63, dd (14.3, 11.9)               |                     | 1.50, dd (10.2, 5.3)       |                     |
| 2          | 2.32, m                             | 37.7                | 2.27, m                    | 36.6                |
| 3          | 5.69, dd (3.5, 3.5)                 | 80.4                | 5.66, dd (3.5, 3.5)        | 82.2                |
| 4          | 2.83, dd (10.0, 3.5)                | 52.0                | 2.59, m                    | 54.2                |
| 5          | 6.17, d (10.0)                      | 65.5                | 6.24, d (10.2)             | 65.8                |
| 6          |                                     | 144.6               |                            | 130.1               |
| 7          | $\alpha$ 2.07, m<br>$\beta$ 2.23, m | 34.9                | 5.58, dd (12.5, 3.6)       | 136.2               |
| 8 $\alpha$ | 1.97, m                             | 21.6                | 2.35, m                    | 24.5                |
| 8 $\beta$  | 1.77, m                             |                     | 2.62, m                    |                     |
| 9          | 1.15, m                             | 35.3                | 1.23, m                    | 30.7                |
| 10         |                                     | 25.2                |                            | 25.5                |
| 11         | 1.39, dd (11.4, 8.3)                | 28.5                | 1.48, d (11.3)             | 28.2                |
| 12         | 6.52, dd (11.4, 0.8)                | 146.5               | 7.69, d (11.3)             | 150.1               |
| 13         |                                     | 134.1               |                            | 134.5               |
| 14         |                                     | 196.7               |                            | 198.2               |
| 15         |                                     | 92.3                |                            | 90.1                |
| 16         | 0.94, d (6.7)                       | 14.1                | 0.94, d (6.8)              | 14.6                |
| 17a        | 5.00, s                             | 115.4               | 4.42, d (12.3)             | 65.2                |
| 17b        | 4.75, s                             |                     | 4.36, d (12.3)             |                     |
| 18         | 1.17, s                             | 29.0                | 1.18, s                    | 28.5                |
| 19         | 1.17, s                             | 16.8                | 1.32, s                    | 16.4                |
| 20         | 1.71, d (0.8)                       | 12.4                | 1.71, br s                 | 12.0                |
| 3-OAc      |                                     |                     | 2.07, s                    | 20.9                |
|            |                                     |                     |                            | 169.4               |
| 5-OAc      | 1.92, s                             | 21.1                | 1.89, s                    | 21.2                |
|            |                                     | 170.3               |                            | 169.6               |
| 15-OAc     | 2.18, s                             | 22.1                |                            |                     |
|            |                                     | 169.8               |                            |                     |
| 17-OAc     |                                     |                     | 2.03, s                    | 21.1                |
|            |                                     |                     |                            | 171.0               |
| cinnamyl 3 |                                     |                     |                            |                     |
| C=O        |                                     | 166.5               |                            |                     |
| 1'         |                                     | 134.3               |                            |                     |
| 2',6'      | 7.52, m                             | 128.1               |                            |                     |
| 3',5'      | 7.38, m                             | 128.8               |                            |                     |
| 4'         | 7.37, m                             | 130.4               |                            |                     |
| 7'         | 7.67, d (16.0)                      | 145.1               |                            |                     |
| 8'         | 6.39, d (16.0)                      | 117.9               |                            |                     |
| 15-OH      |                                     |                     | 2.98, s                    |                     |

4. Table S3. The gene-specific primer sequences for RT-qPCR.

| Gene          | Species | Forward primer<br>(5'→3')   | Reverse primer<br>(5'→3')   |
|---------------|---------|-----------------------------|-----------------------------|
| <i>ACTB</i>   | Human   | CCTTGCACATGCCGGA<br>G       | GCACAGAGCCTCGCCTT           |
| <i>CYP3A4</i> | Human   | GTGGGGCTTTTATGAT<br>GGTCA   | GCCTCAGATTTCTCACCAA<br>CACA |
| <i>CYP2B6</i> | Human   | CCGGGGATATGGTGTG<br>ATCTT   | CCGAAGTCCCTCATAGTGG<br>TC   |
| <i>MDR1</i>   | Human   | CCATAGCTCGTGCCCT<br>TGTTAGA | CGGTGAGCAATCACAAATGC<br>AG  |

5. Figure S1. The key  $^1\text{H}$ - $^1\text{H}$  COSY (—) and HMBC (→) correlations of compounds 1–5.

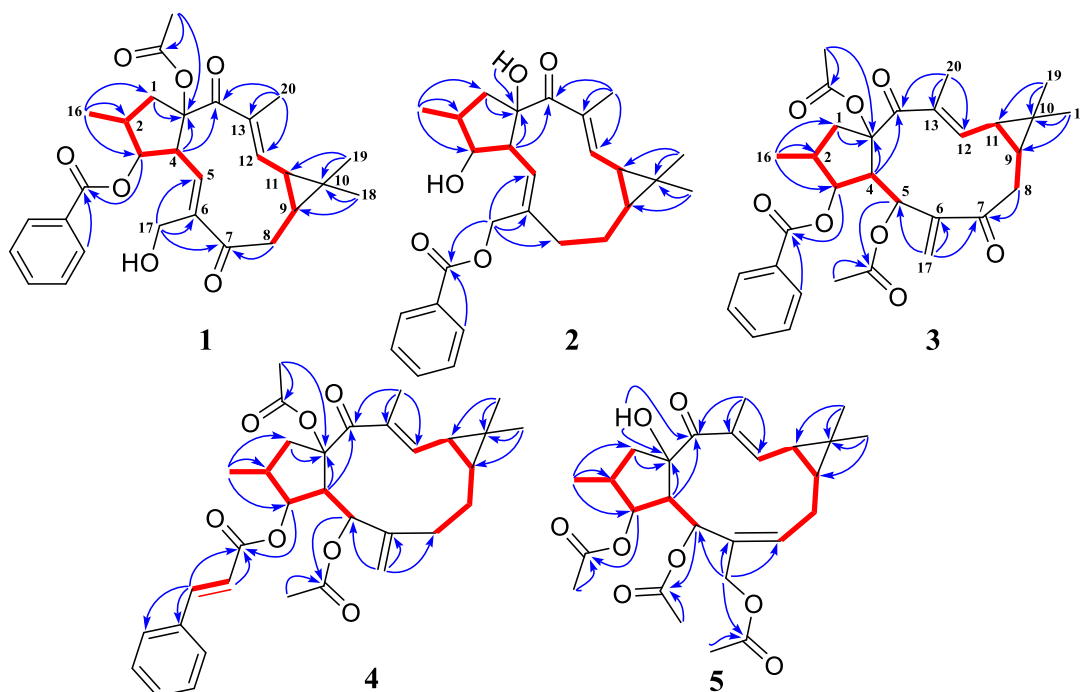

6. S2. The key NOE ( $\dashrightarrow$ ) correlations of compounds 1–5.

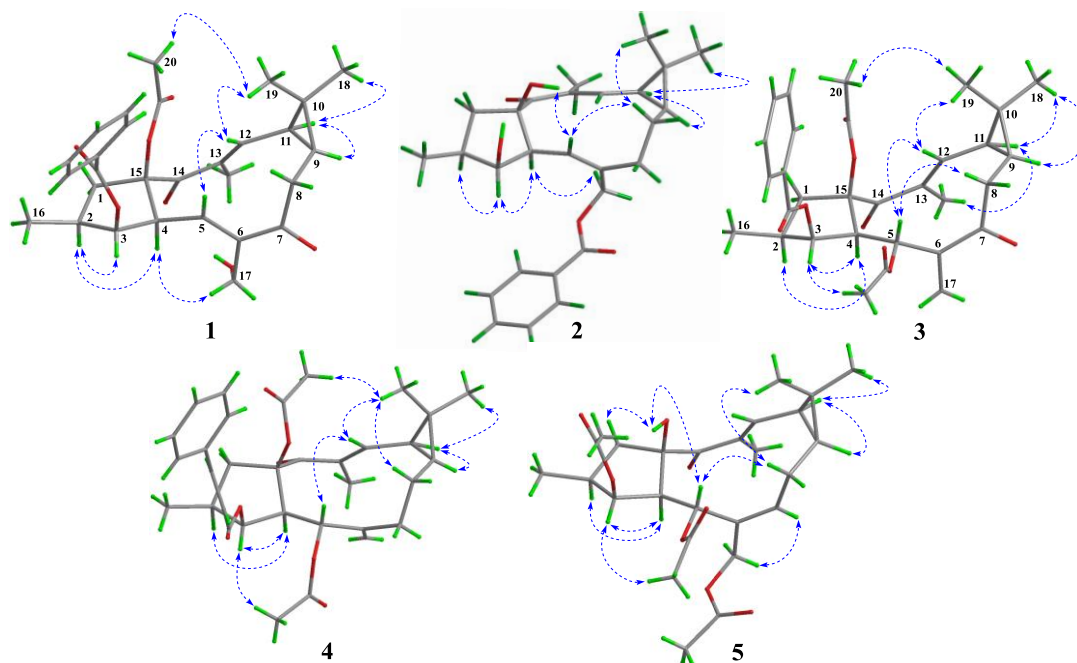

7. Figure S3. ORTEP diagram of compounds 26, 30, and 31.

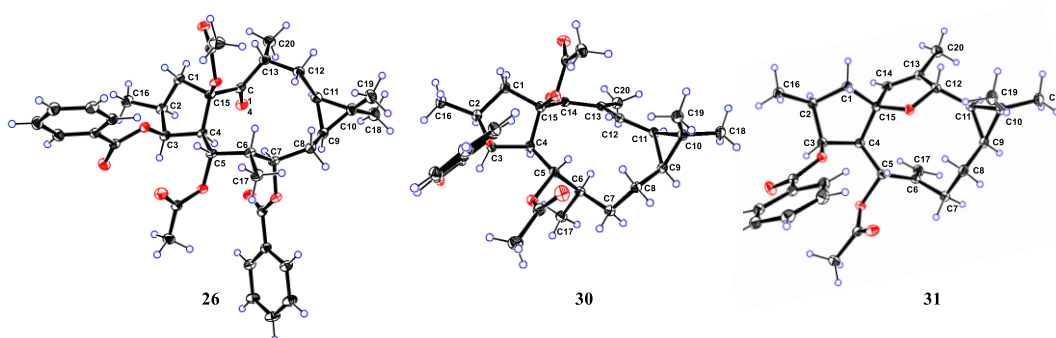

8. Figure S4. Chemical correlations of compounds 3, 4, 5, 9, 10, 13, 14, and 35.

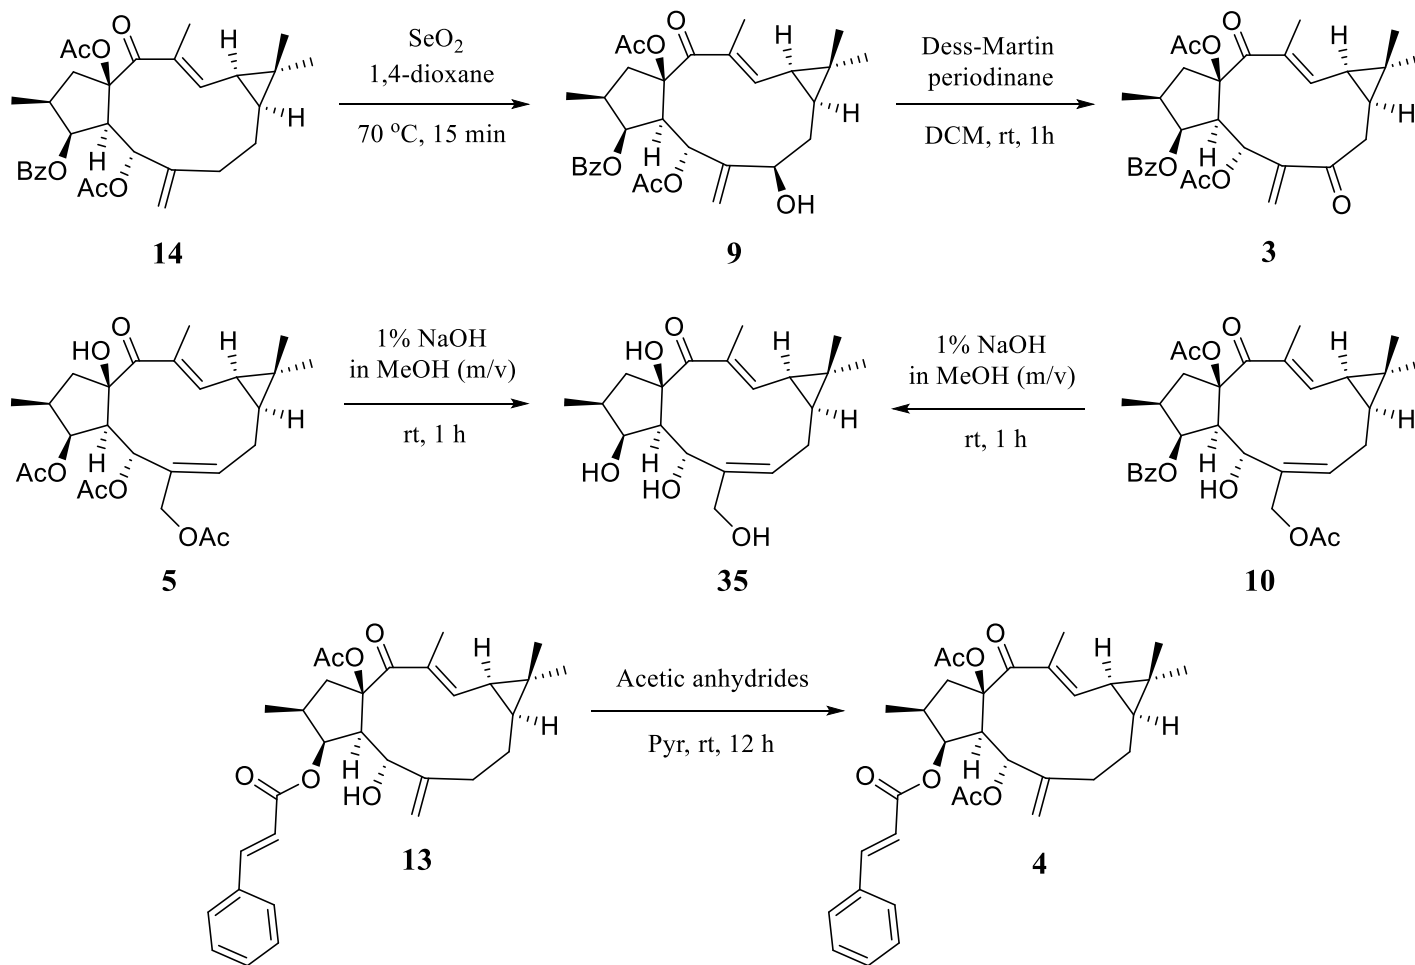

9. Figure S5. The cytotoxicity of compounds 1–34.

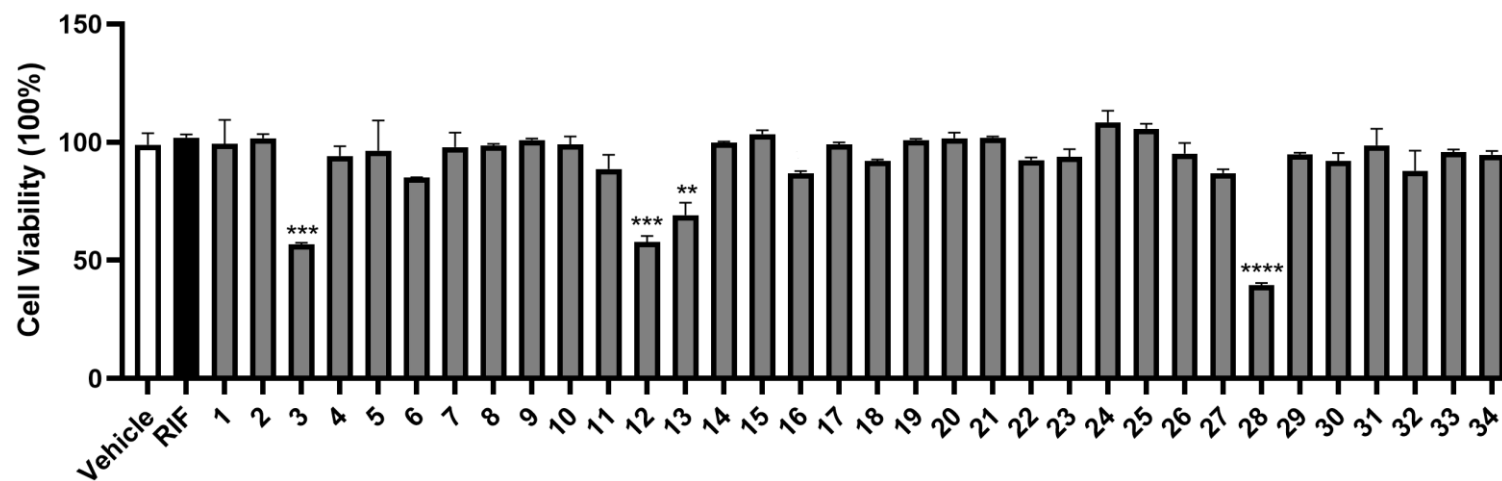

Cell Counting Kit-8 (CCK8) assay was applied to test cytotoxicity of compounds. HEK-293T cells were seeded in a 96-well plate ( $1 \times 10^4$ /well) and treated with RIF or compounds at  $10 \mu\text{M}$  for 24 h. After that,  $10 \mu\text{L}$  CCK8 was applied to each well and incubated for an hour at  $37^\circ\text{C}$ . Cell viability was quantified by measuring optical density at 450 nm with a microplate reader.

10. Figure S6–S115.

Figure S6. <sup>1</sup>H NMR spectrum of **1** in CDCl<sub>3</sub>.

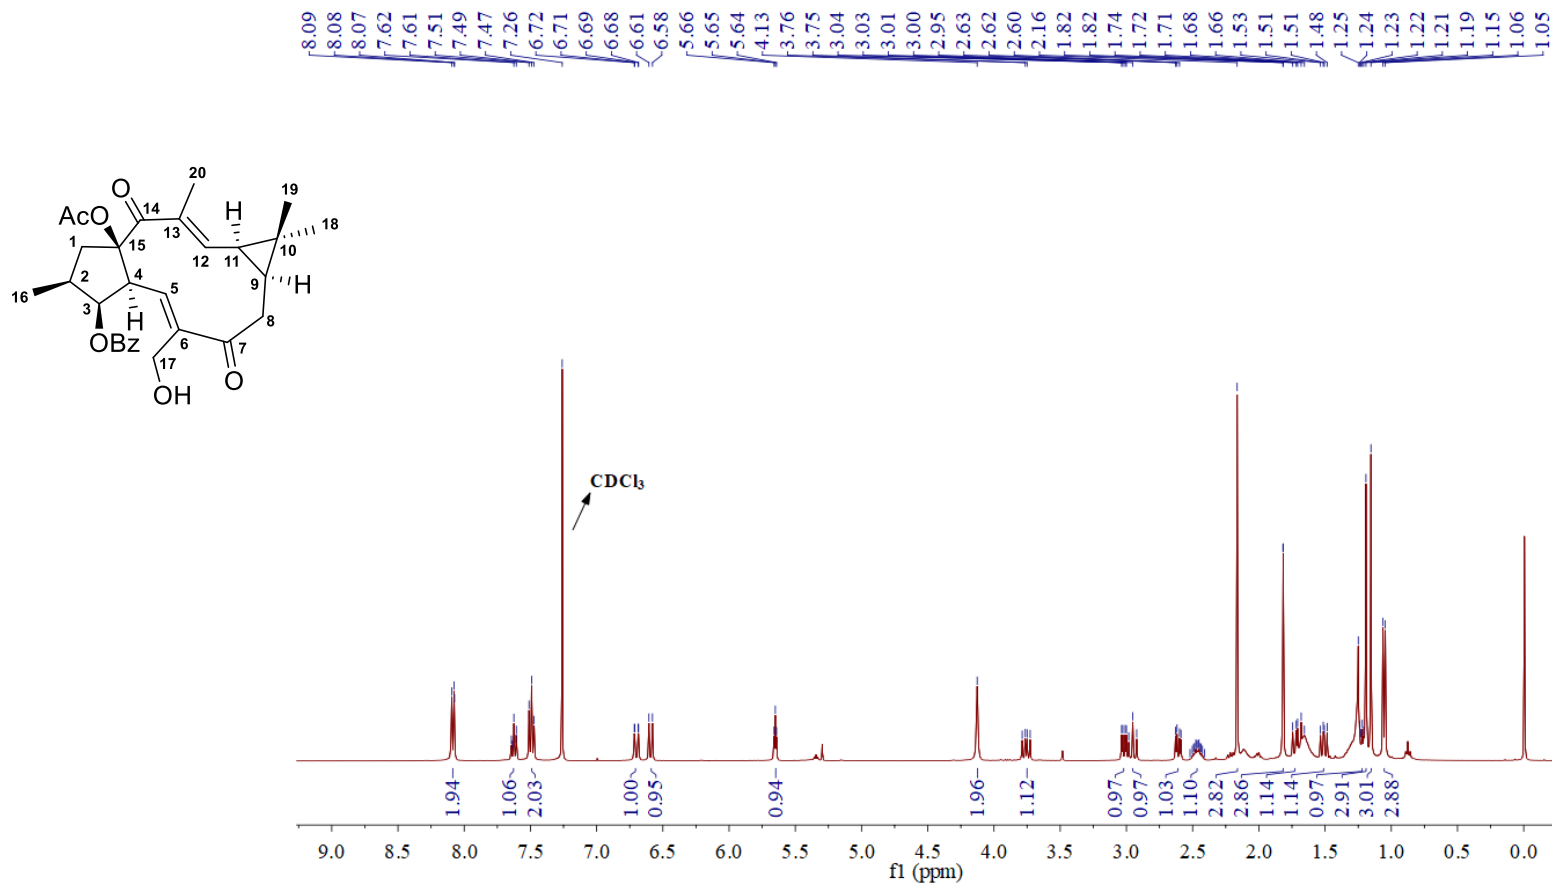



Figure S7.  $^{13}\text{C}$  NMR and DEPT 135 spectra of **1** in  $\text{CDCl}_3$ .

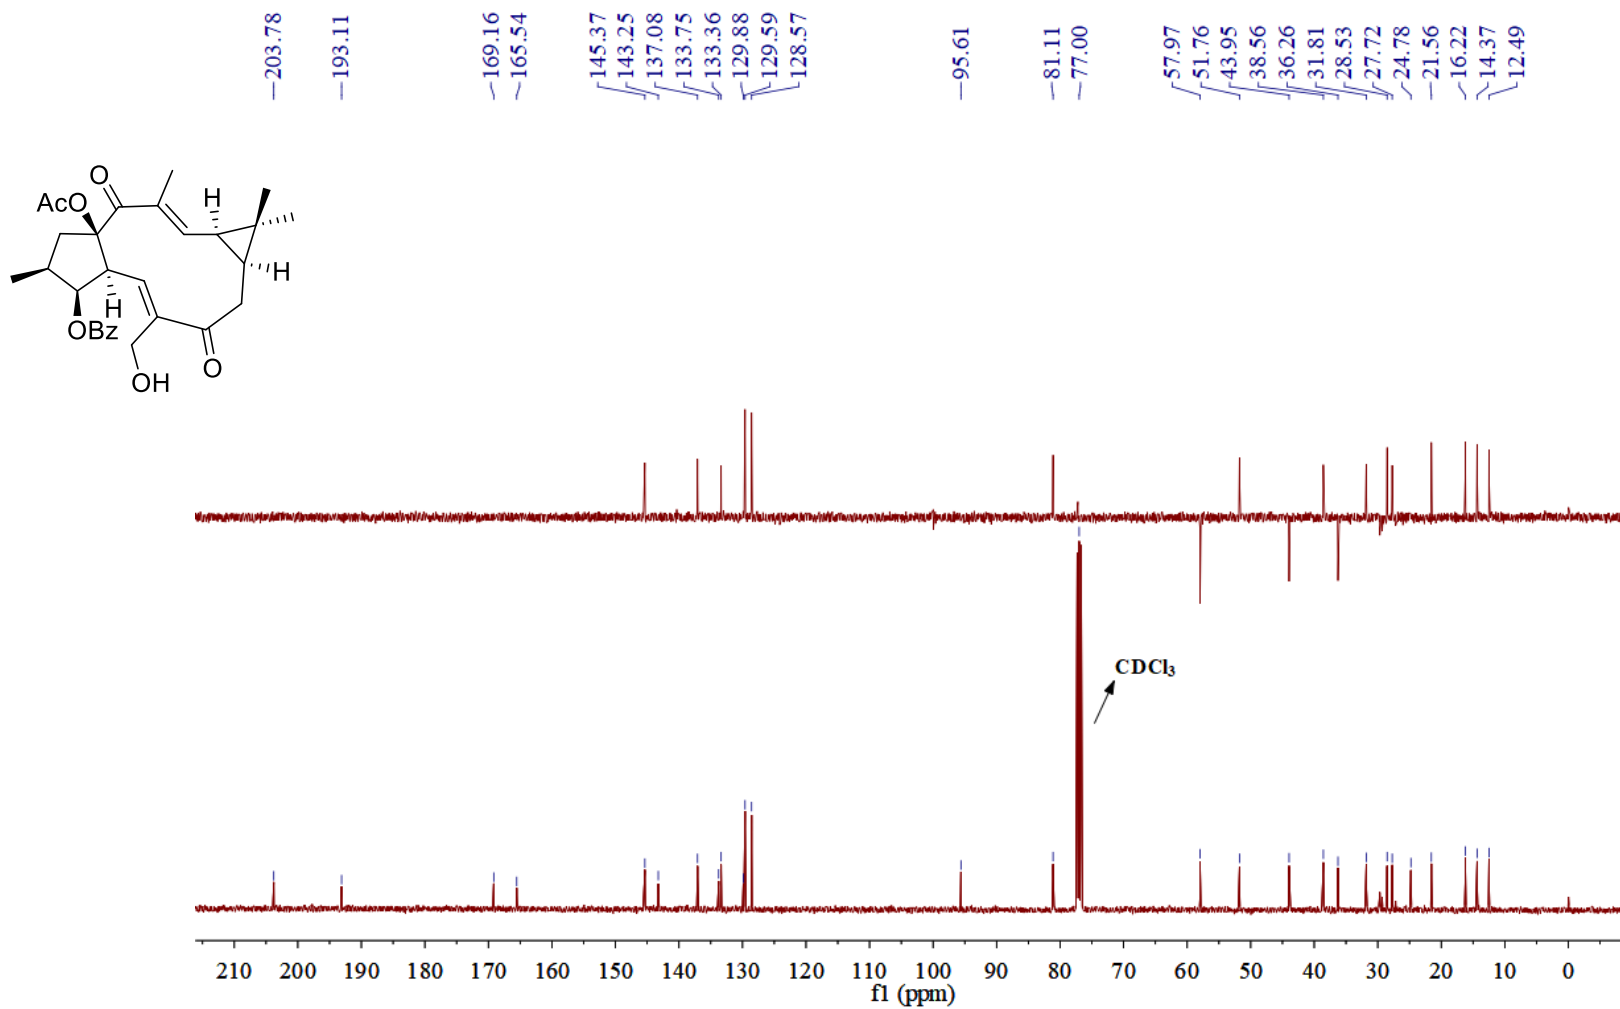

Figure S8. HSQC spectrum of **1** in CDCl<sub>3</sub>.

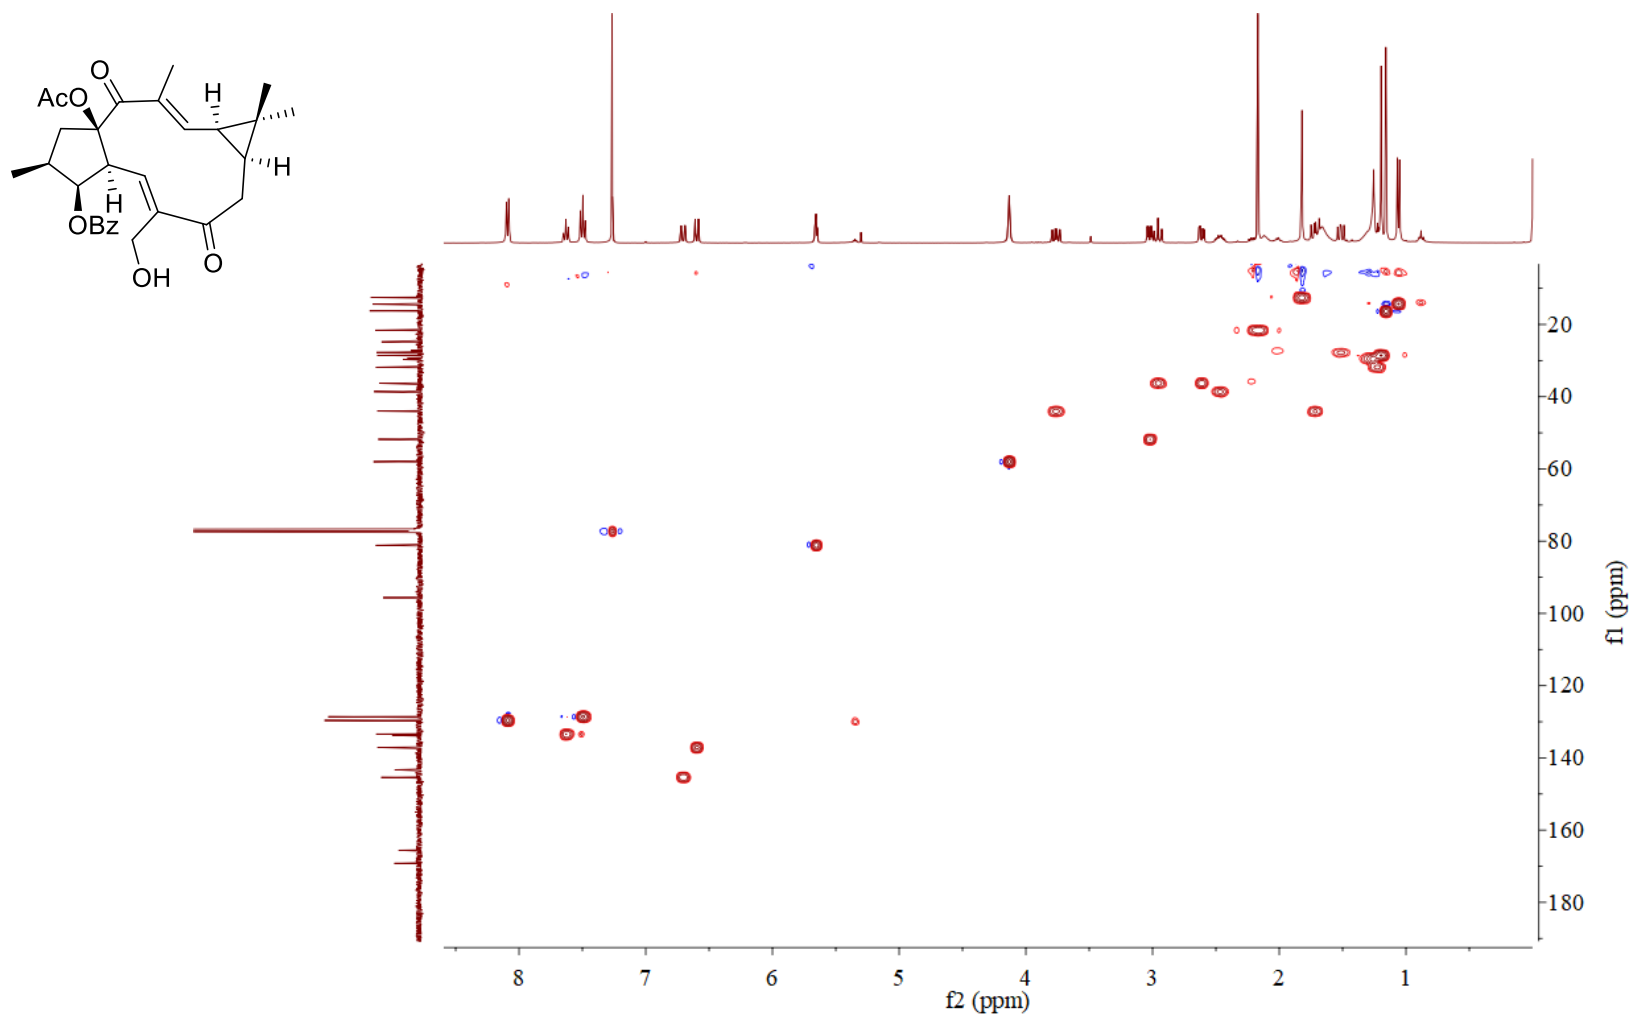

Figure S9. HMBC spectrum of **1** in CDCl<sub>3</sub>.

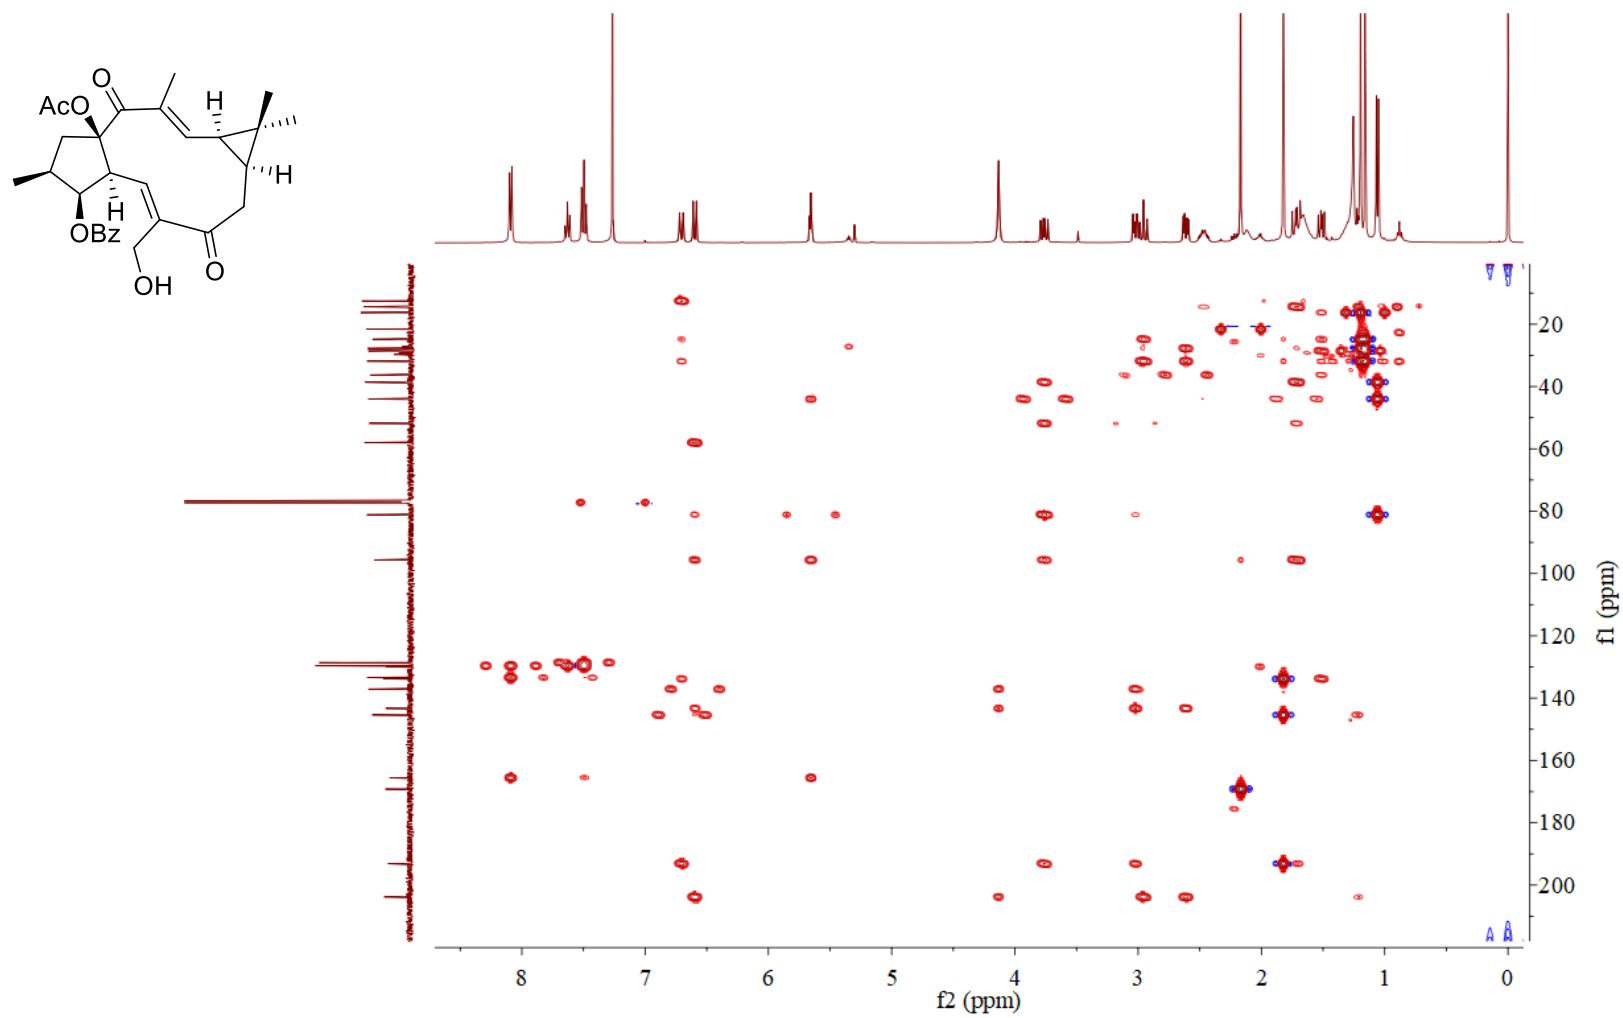

**Figure S10.**  $^1\text{H}$ - $^1\text{H}$  COSY spectrum of **1** in  $\text{CDCl}_3$ .

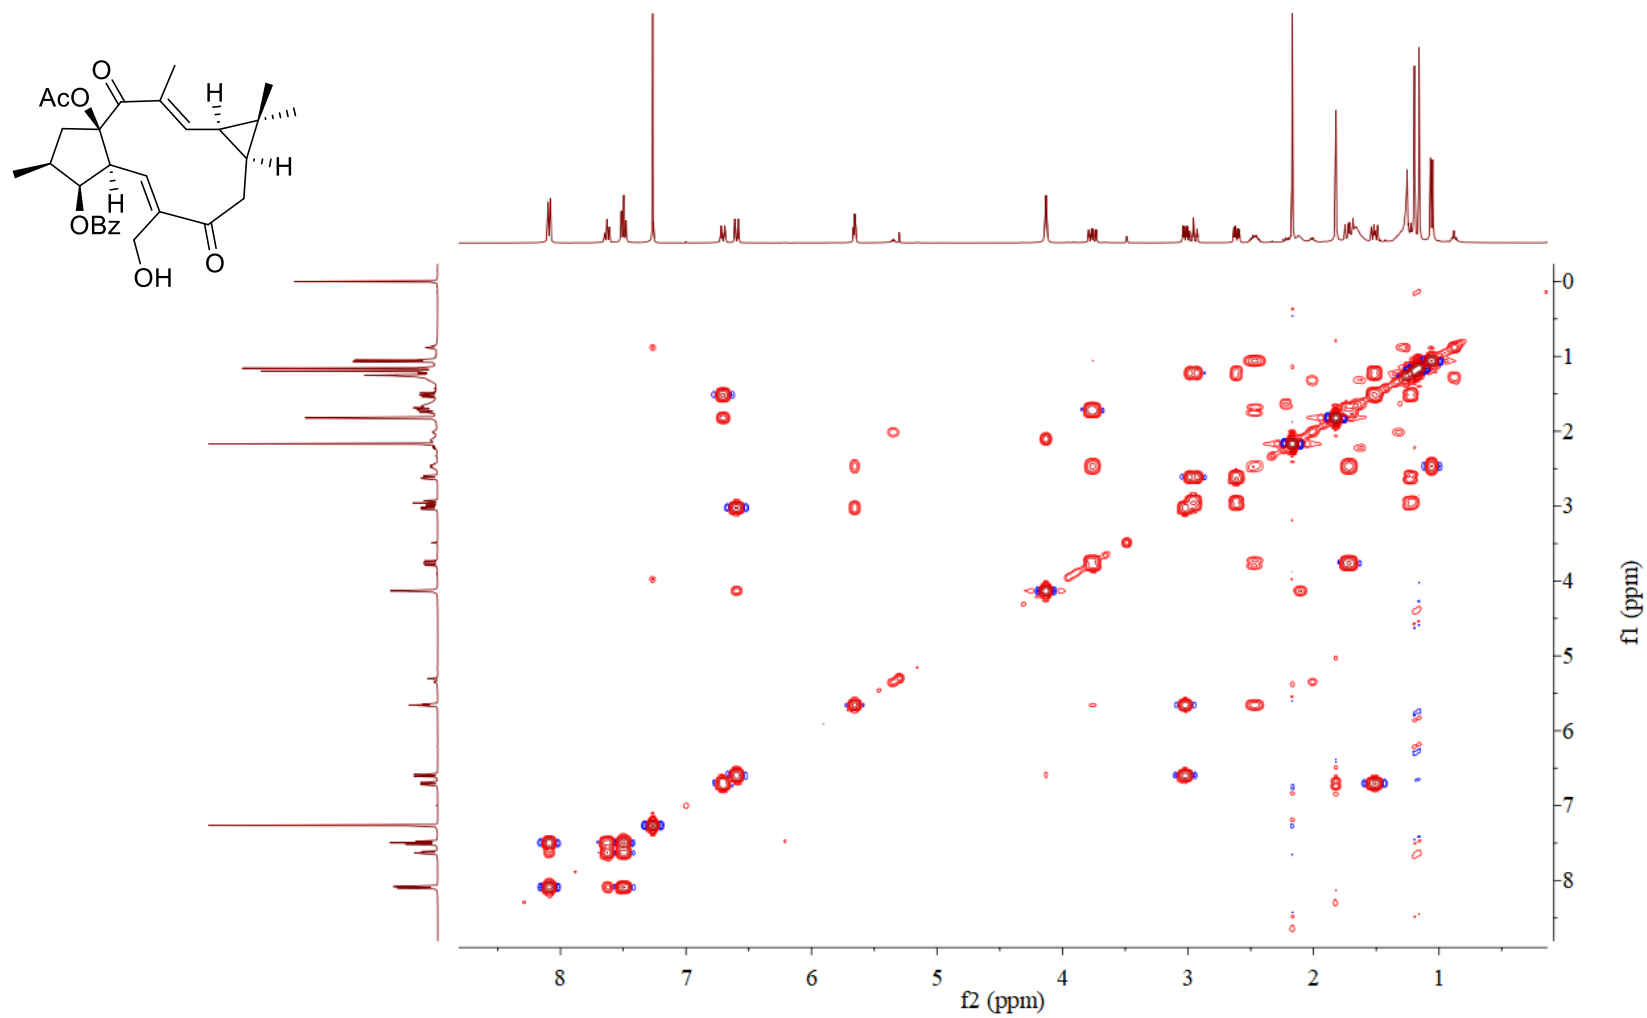

Figure S11. NOESY spectrum of **1** in CDCl<sub>3</sub>.

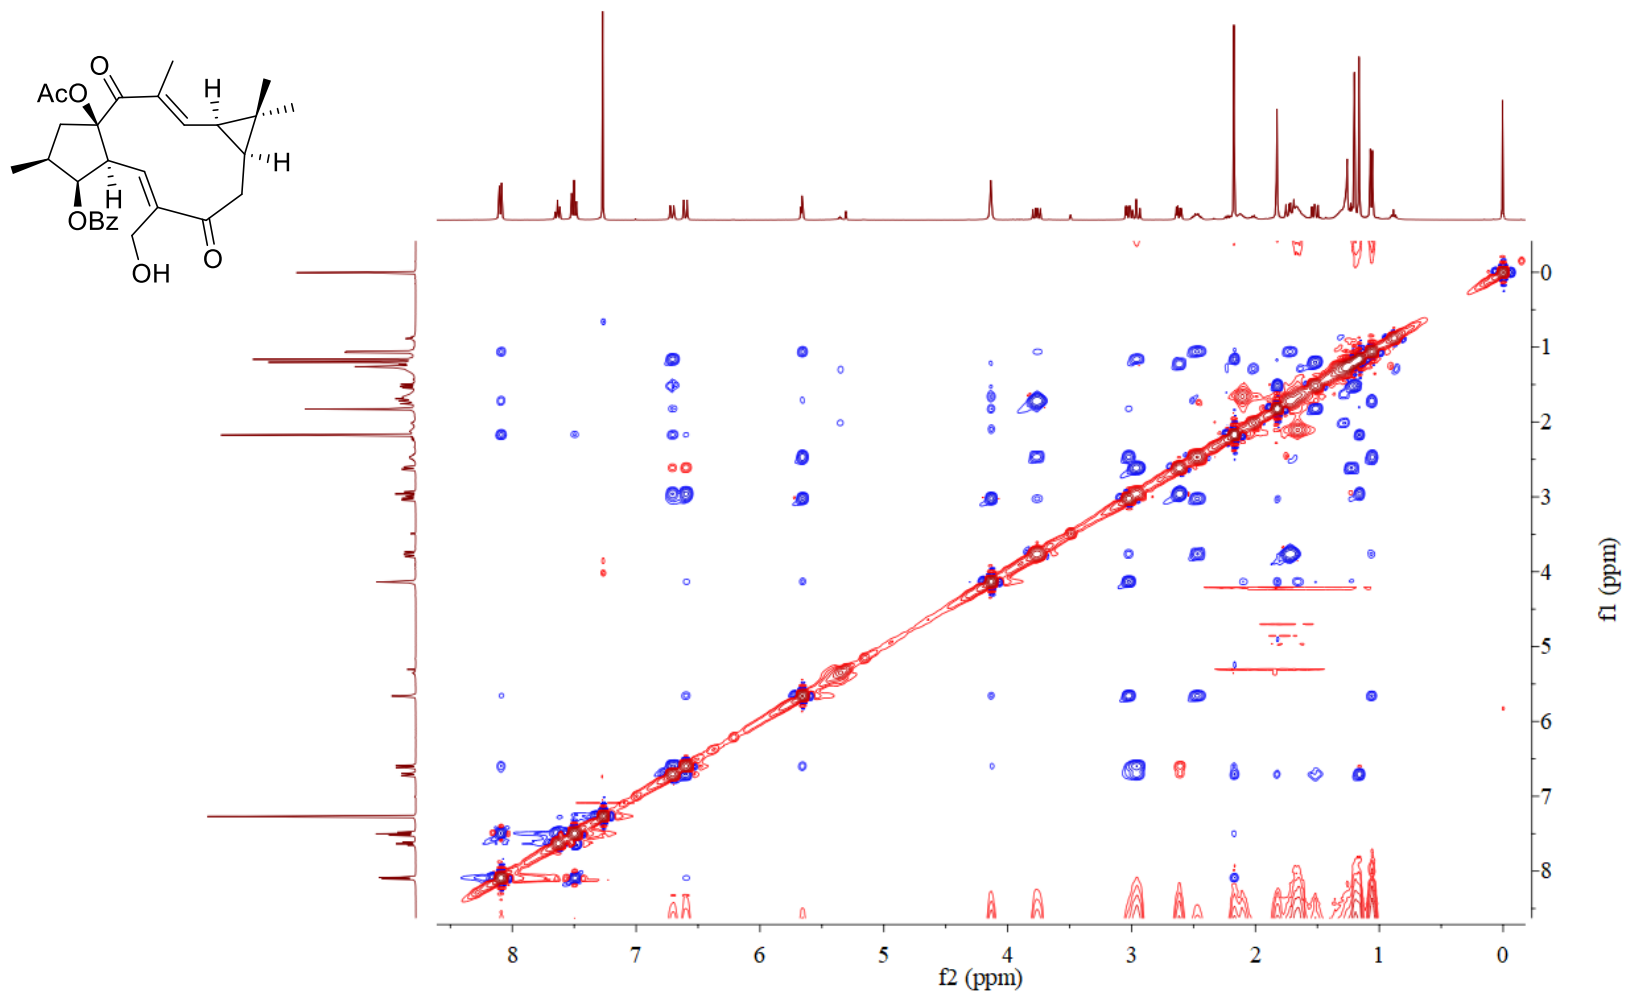

Figure S12. <sup>1</sup>H NMR spectrum of **2** in CDCl<sub>3</sub>.

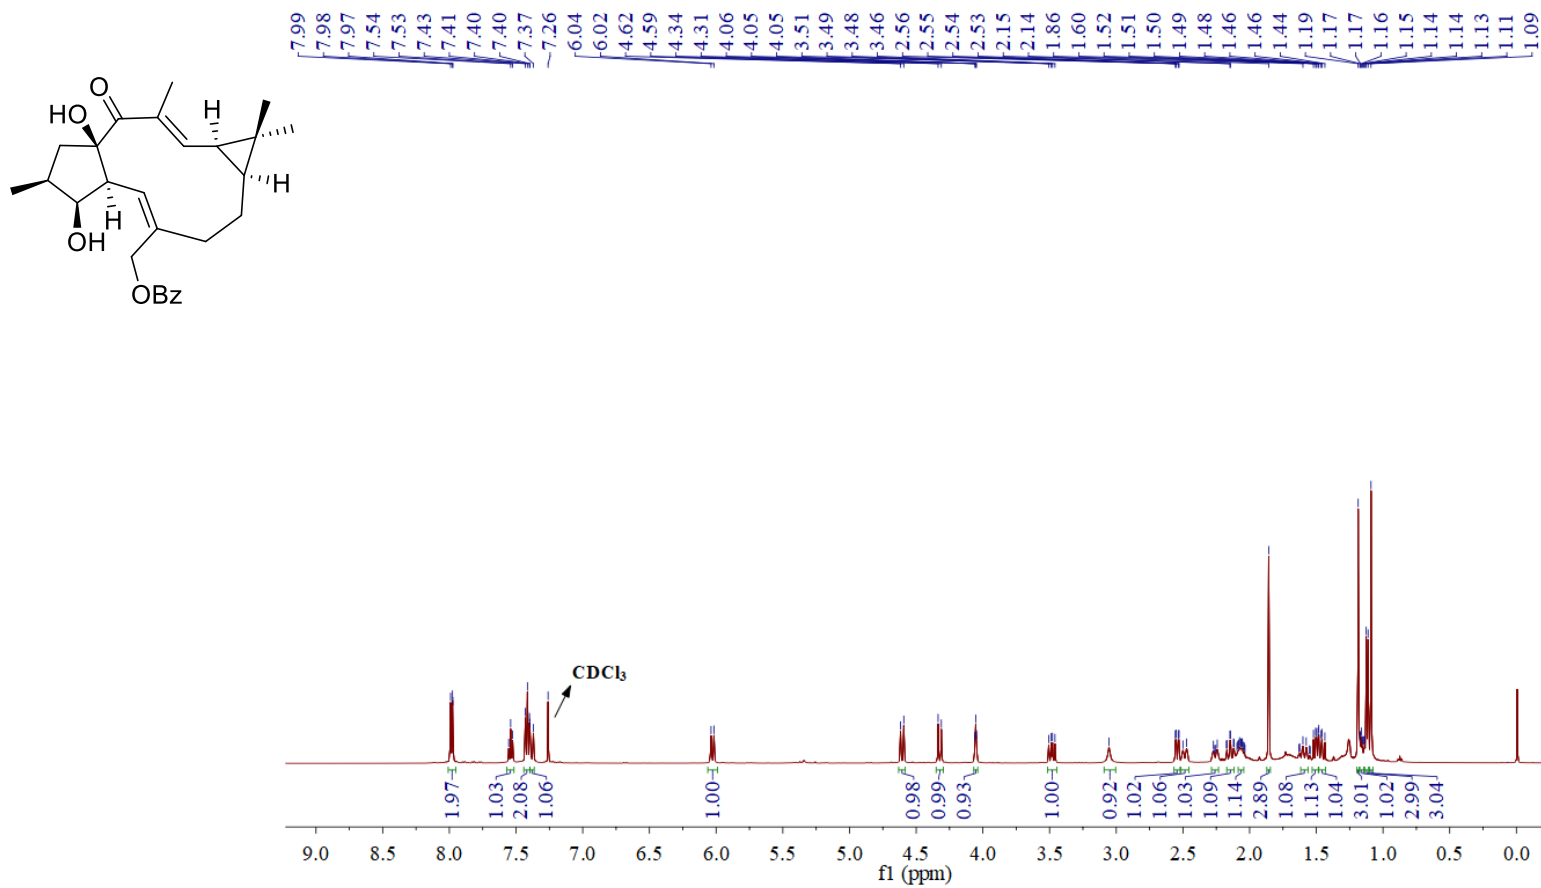

Figure S13.  $^{13}\text{C}$  NMR and DEPT 135 spectra of **2** in  $\text{CDCl}_3$ .

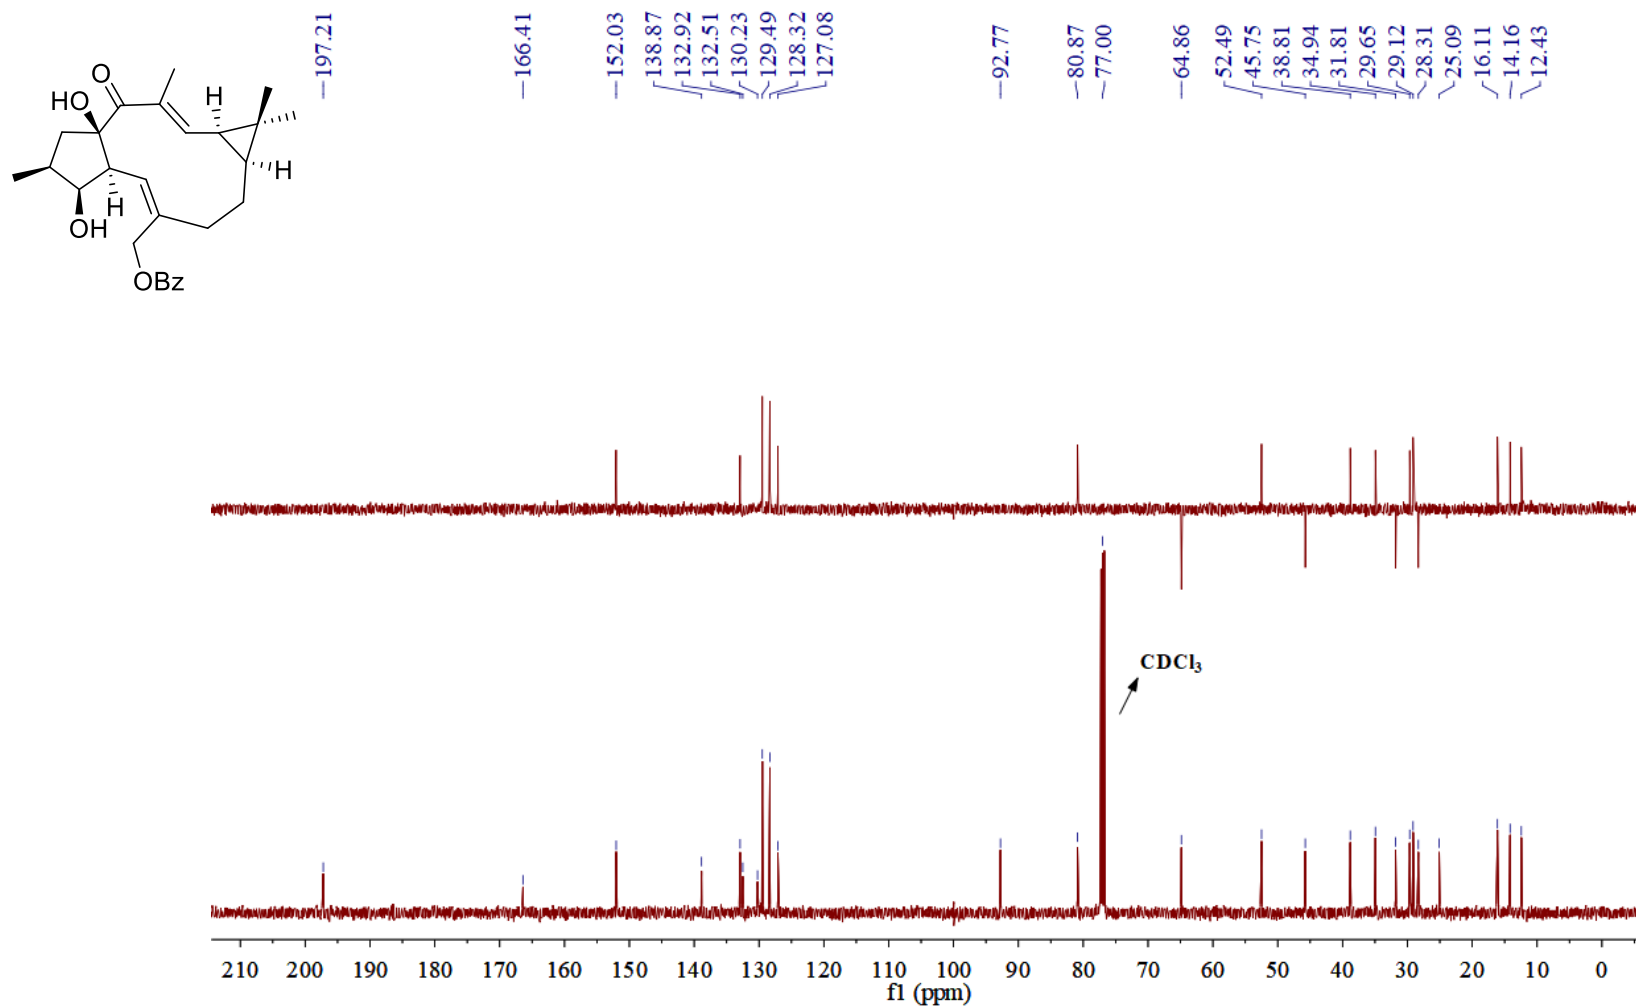

Figure S14. HSQC spectrum of **2** in CDCl<sub>3</sub>.

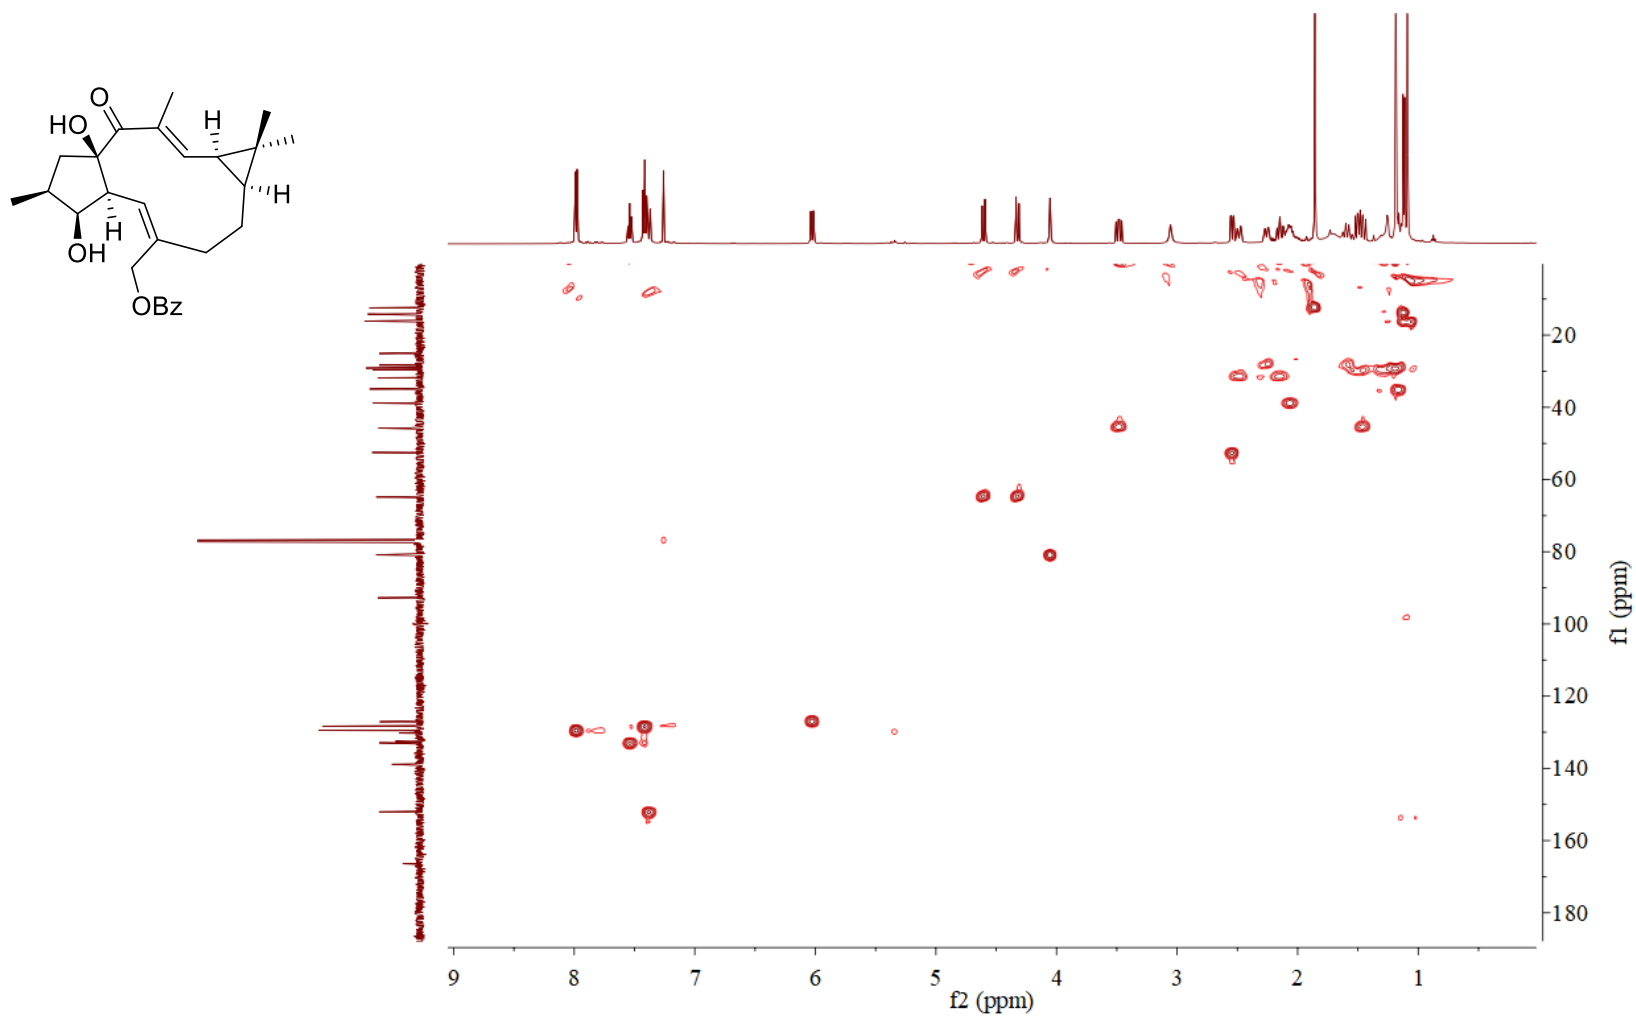



Figure S15. HMBC spectrum of **2** in CDCl<sub>3</sub>.

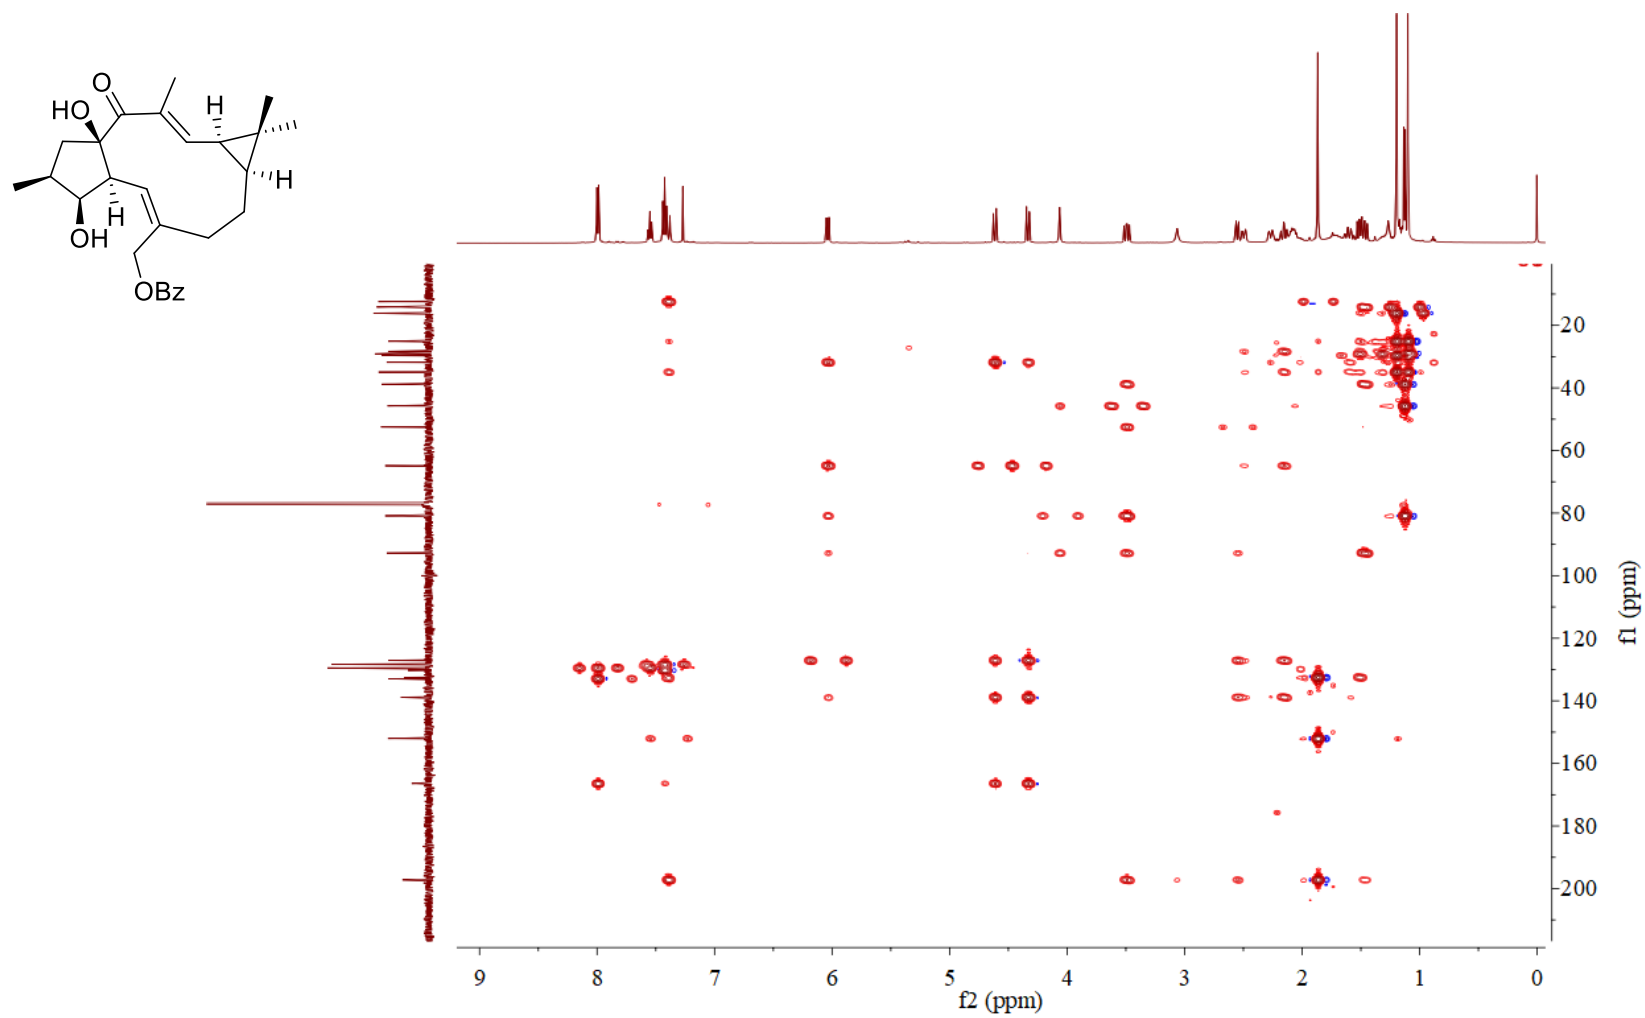

Figure S16.  $^1\text{H}$ - $^1\text{H}$  COSY spectrum of **2** in  $\text{CDCl}_3$ .

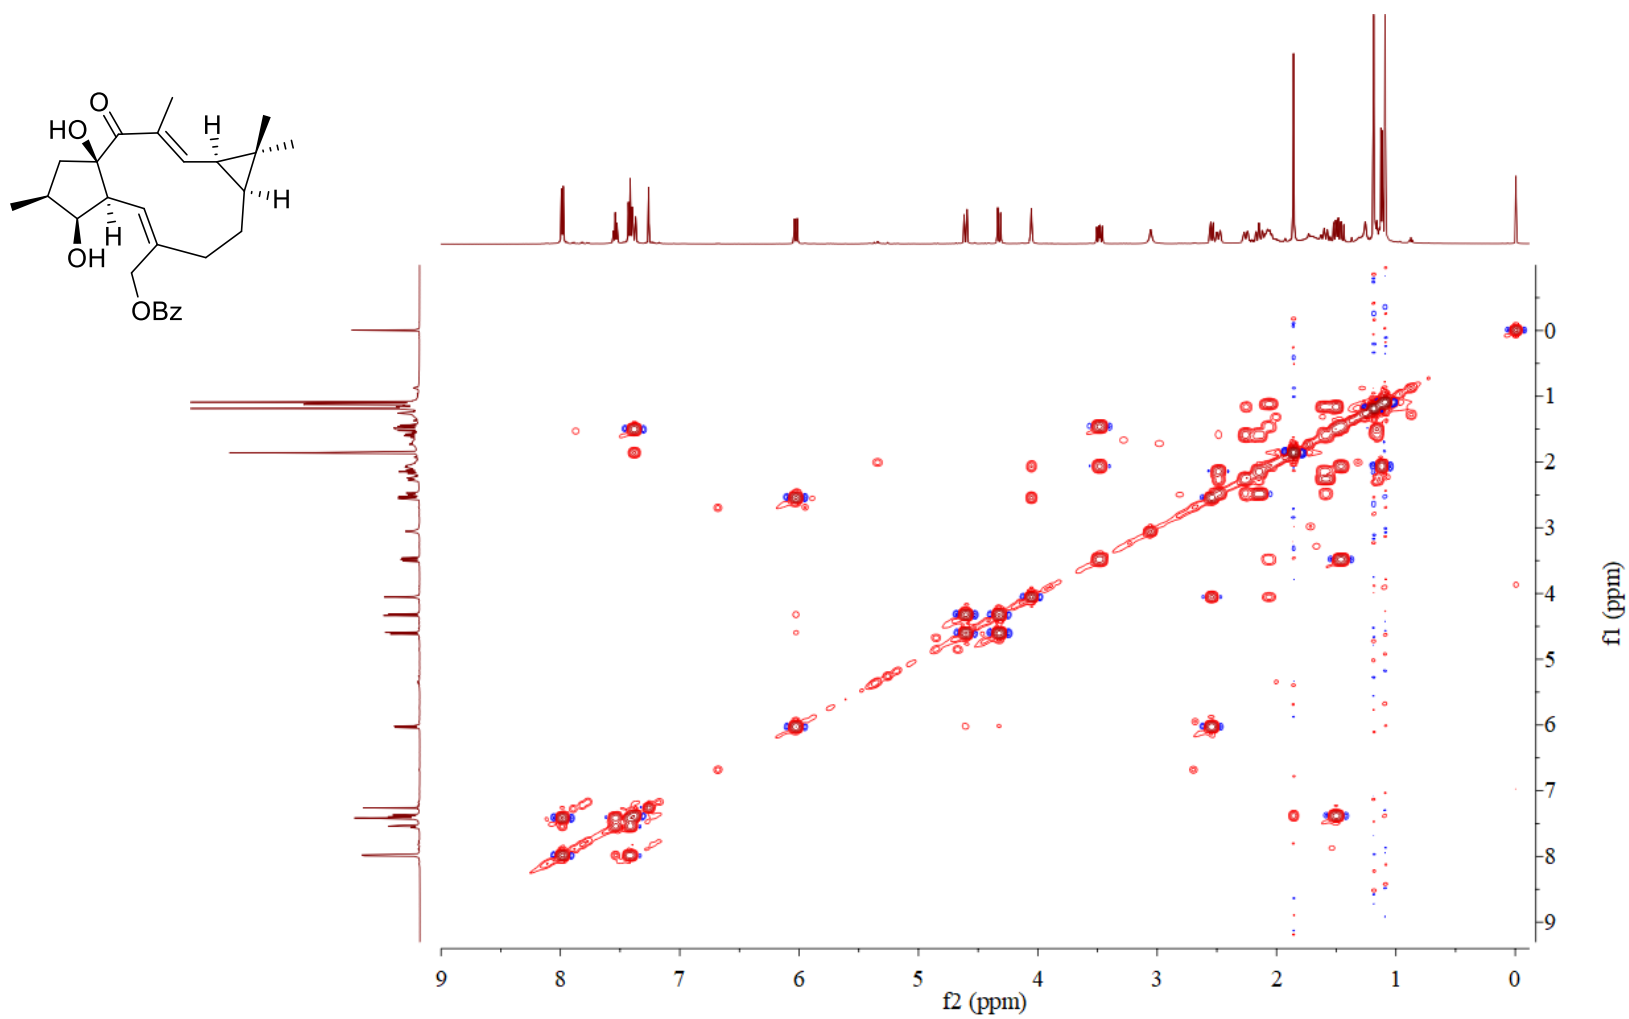

Figure S17. NOESY spectrum of **2** in CDCl<sub>3</sub>.

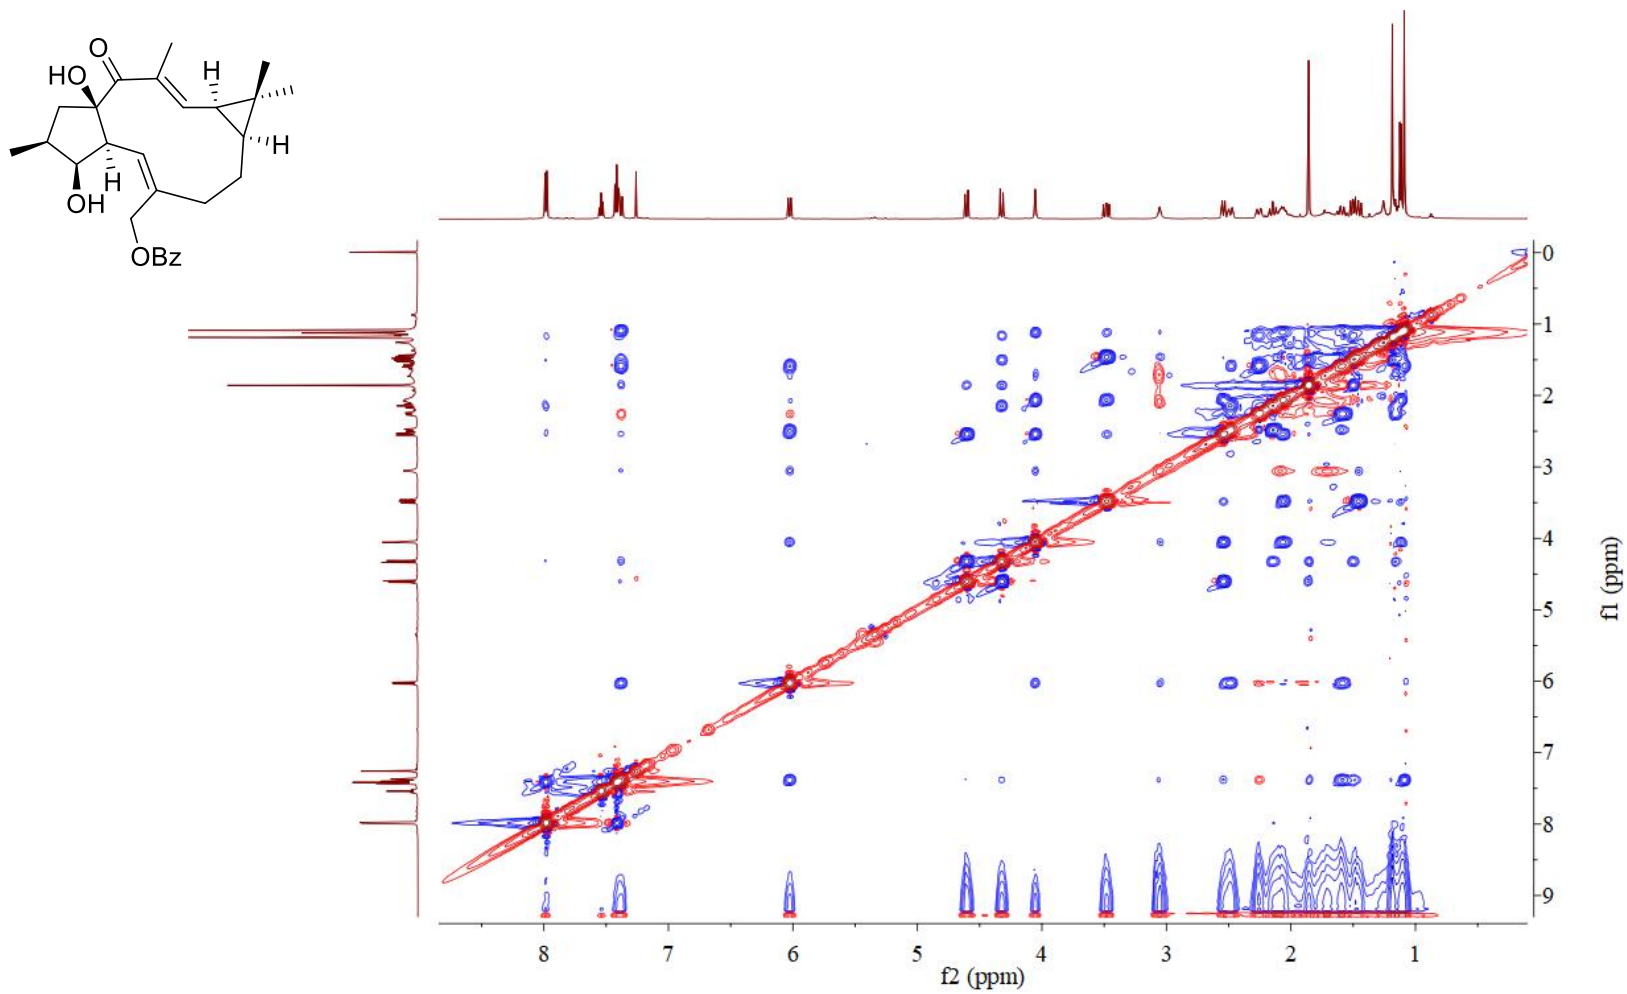

Figure S18. <sup>1</sup>H NMR spectrum of **3** in CDCl<sub>3</sub>.

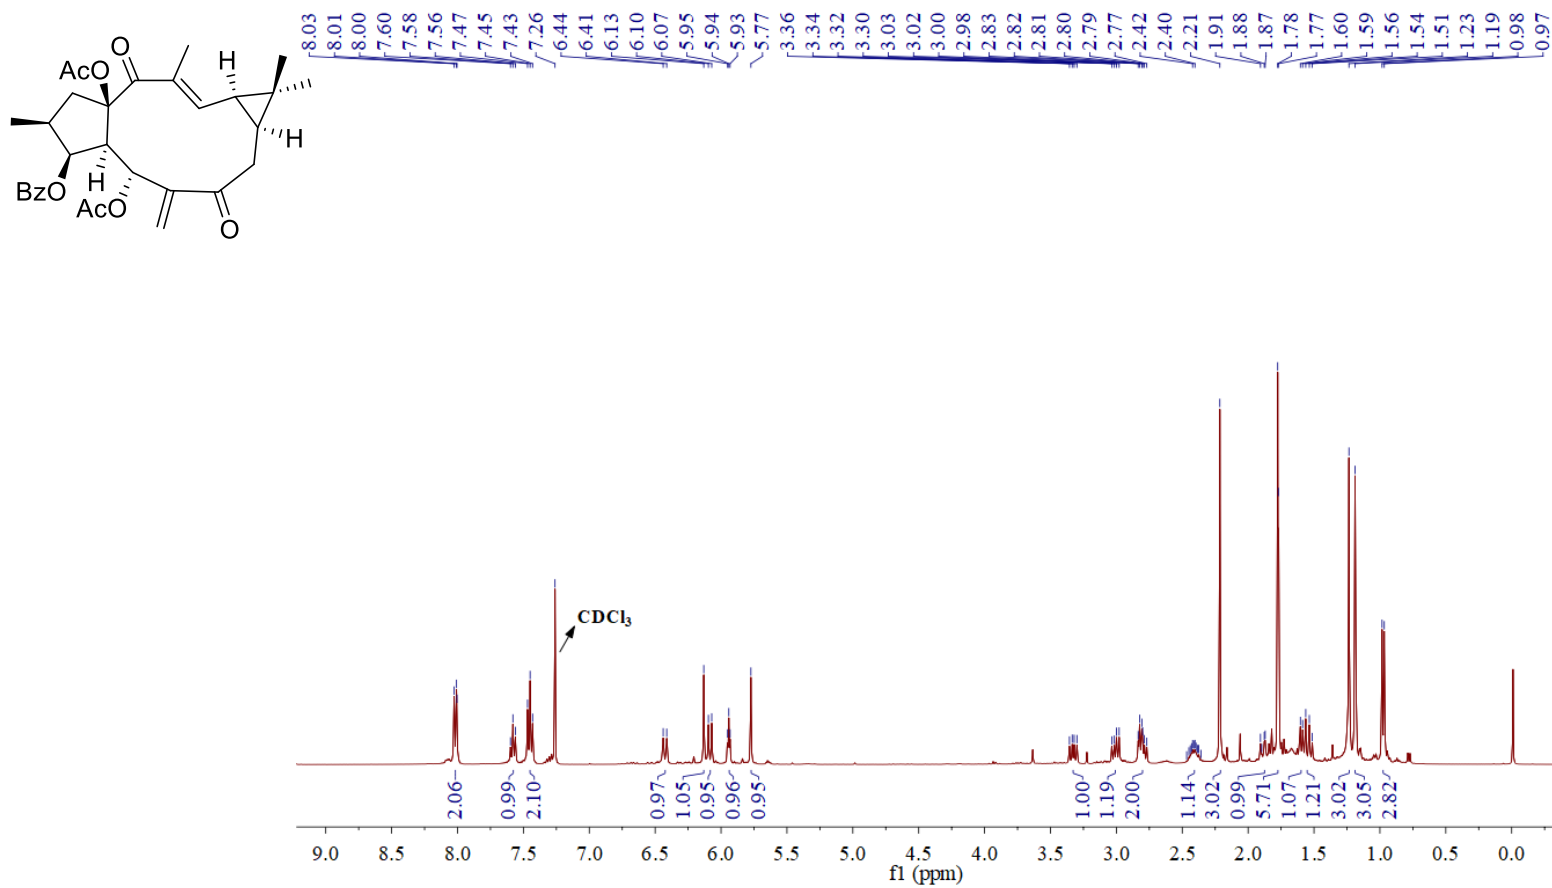

Figure S19.  $^{13}\text{C}$  NMR and DEPT 135 spectra of **3** in  $\text{CDCl}_3$ .

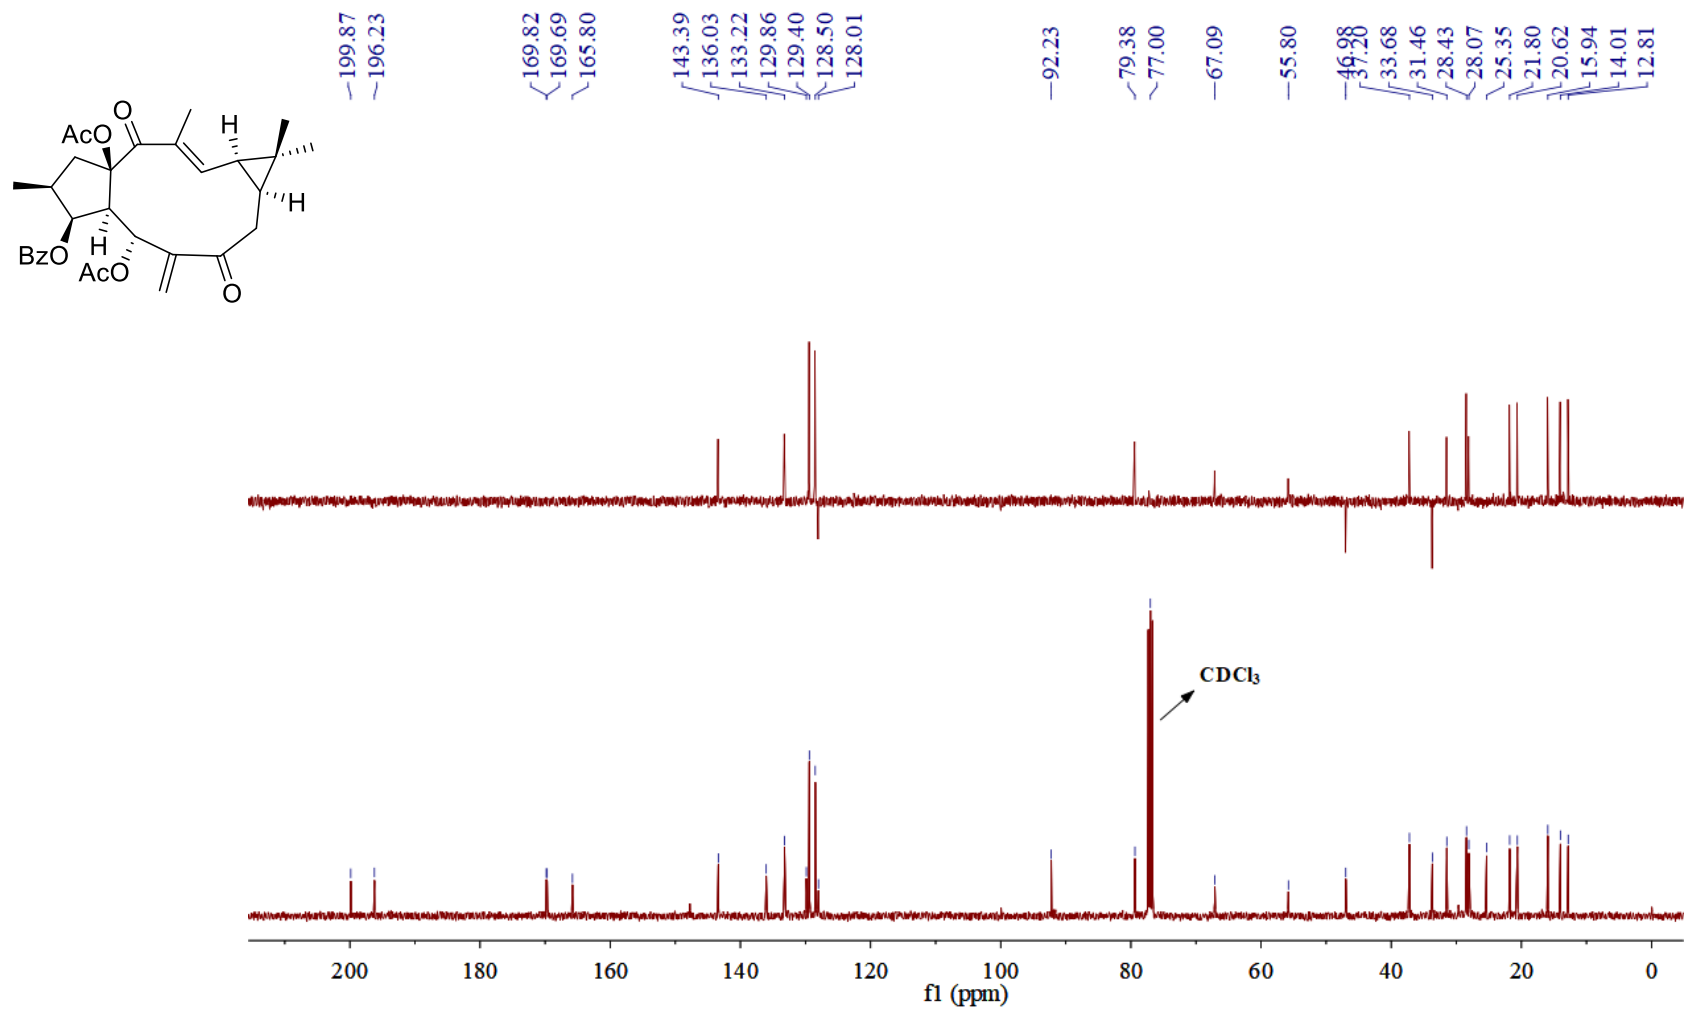

Figure S20. HSQC spectrum of **3** in CDCl<sub>3</sub>.

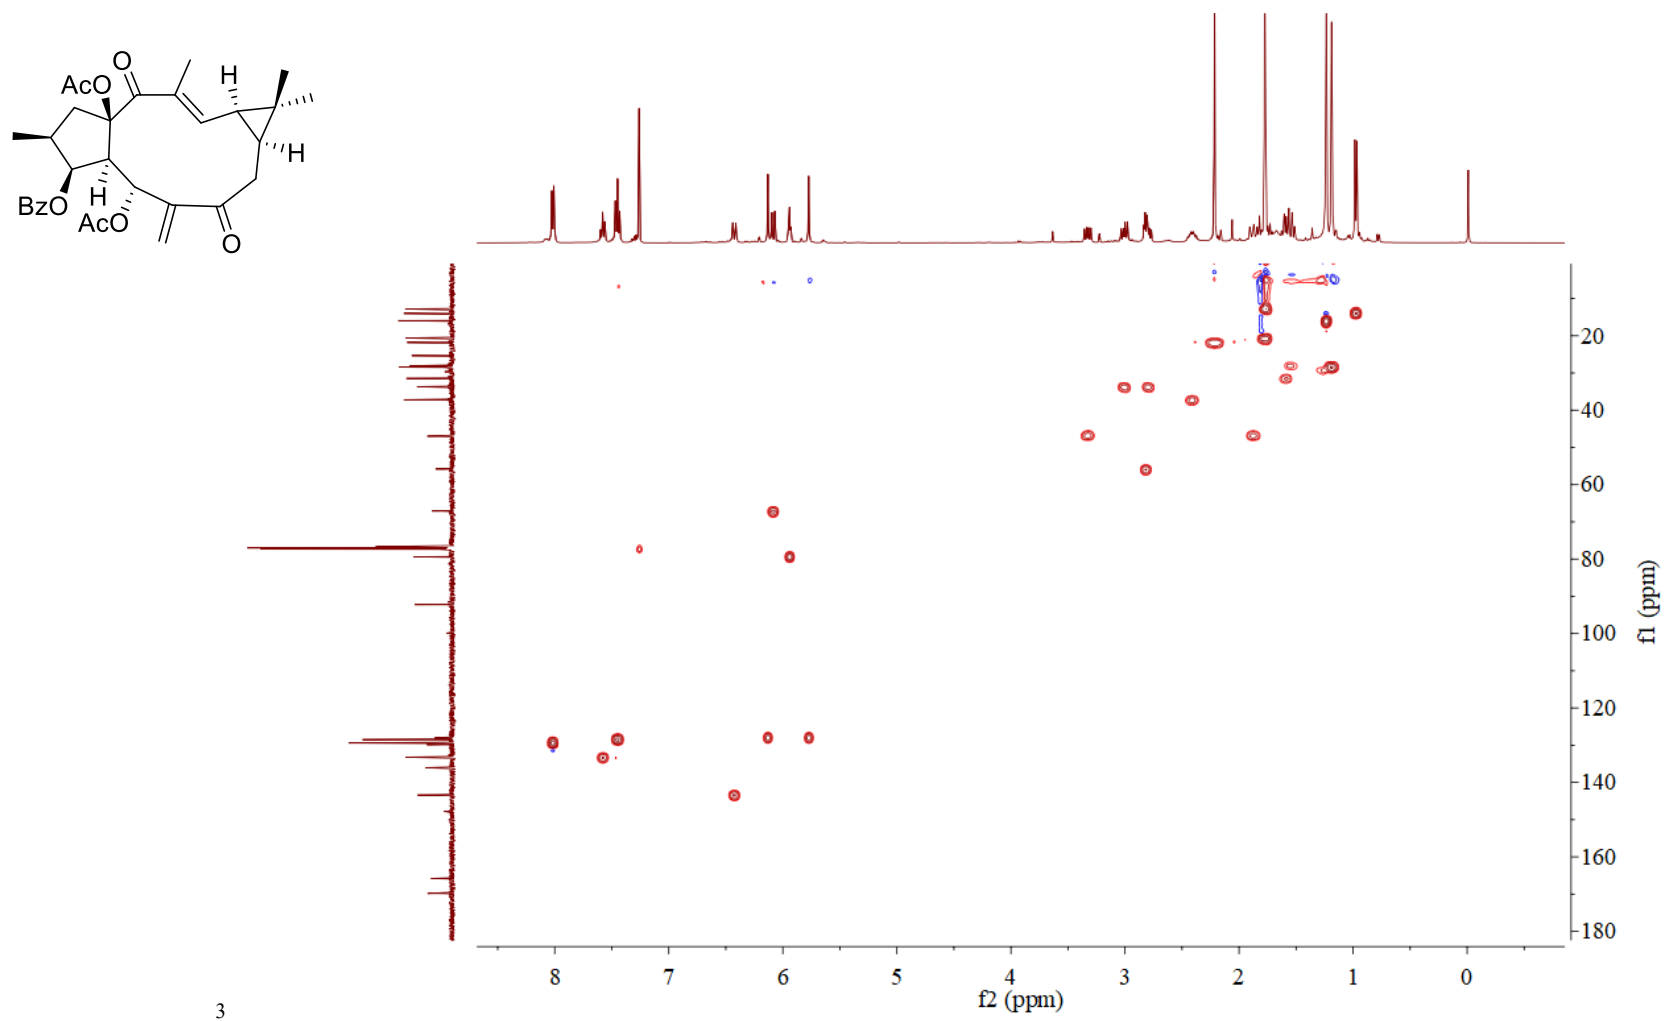

Figure S21. HMBC spectrum of **3** in CDCl<sub>3</sub>.

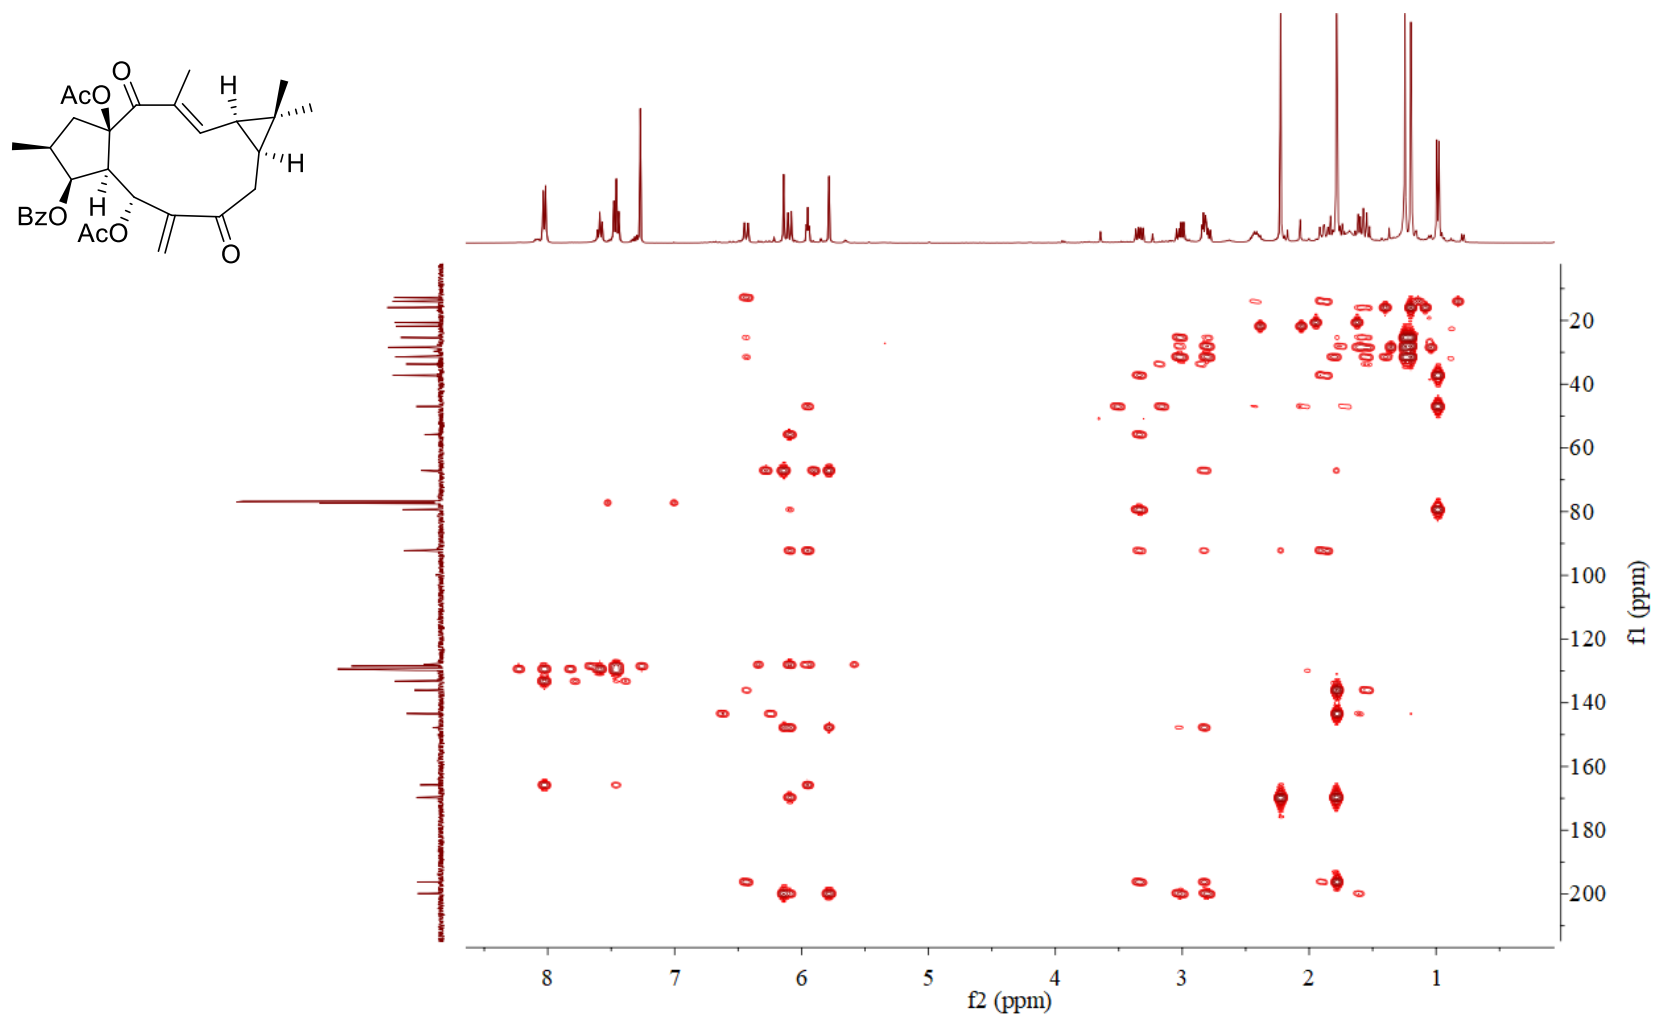

**Figure S22.**  $^1\text{H}$ - $^1\text{H}$  COSY spectrum of **3** in  $\text{CDCl}_3$ .

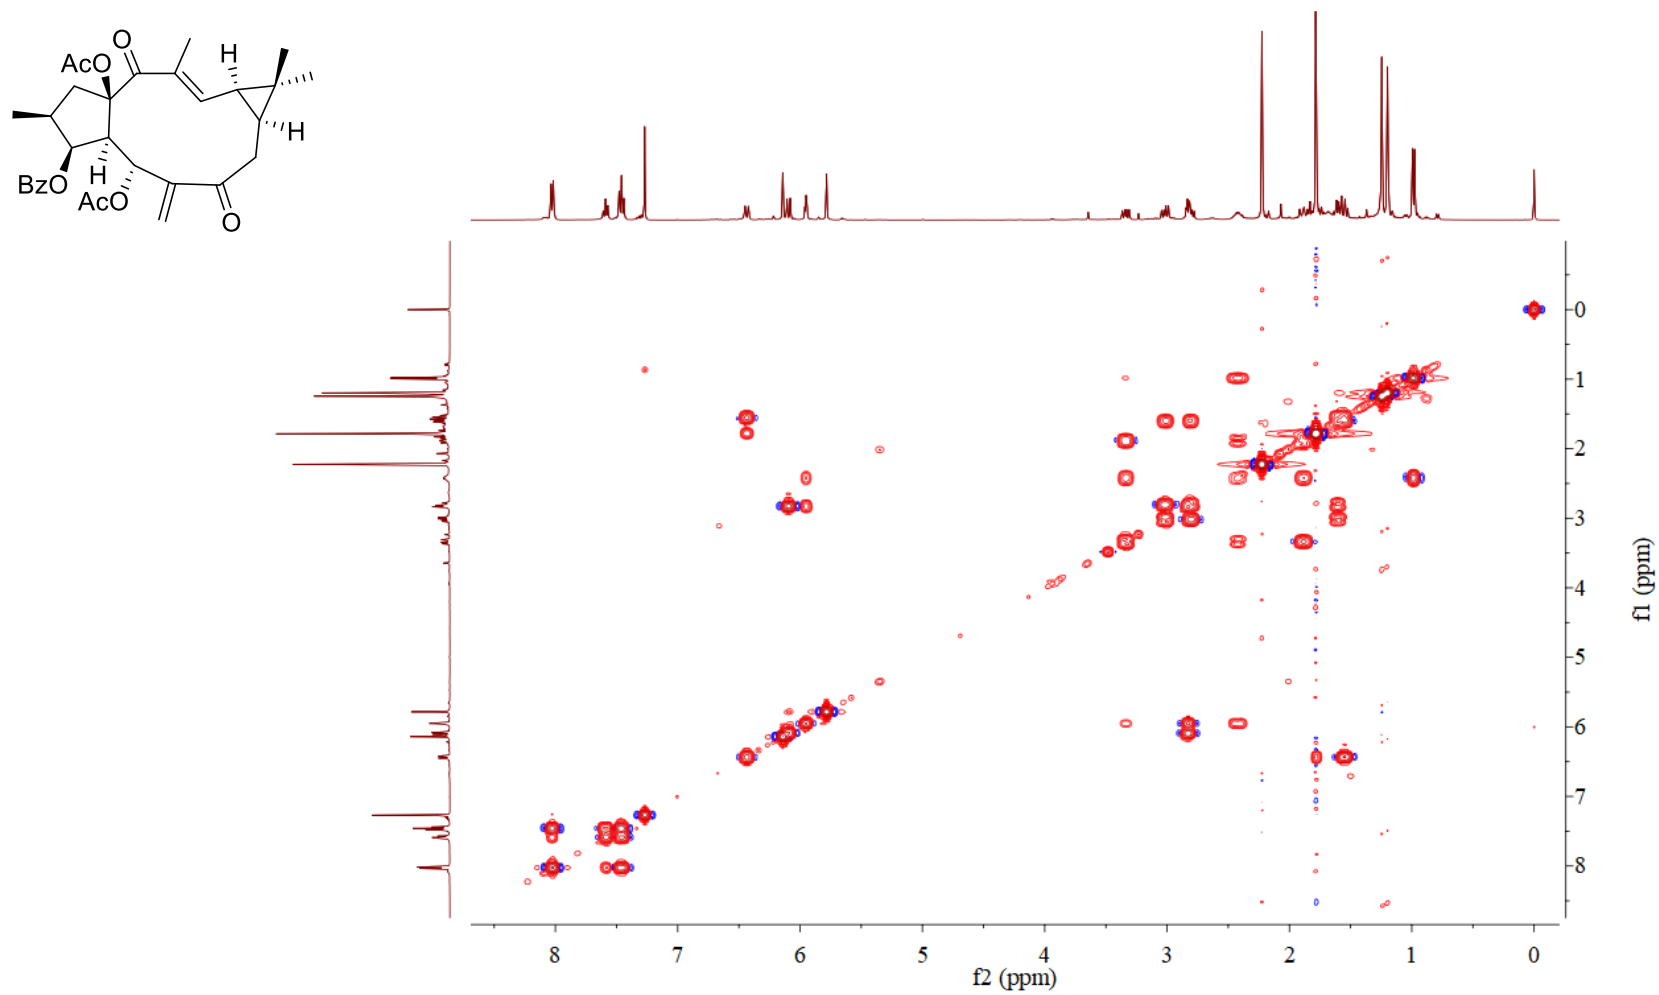



Figure S23. NOESY spectrum of **3** in CDCl<sub>3</sub>.

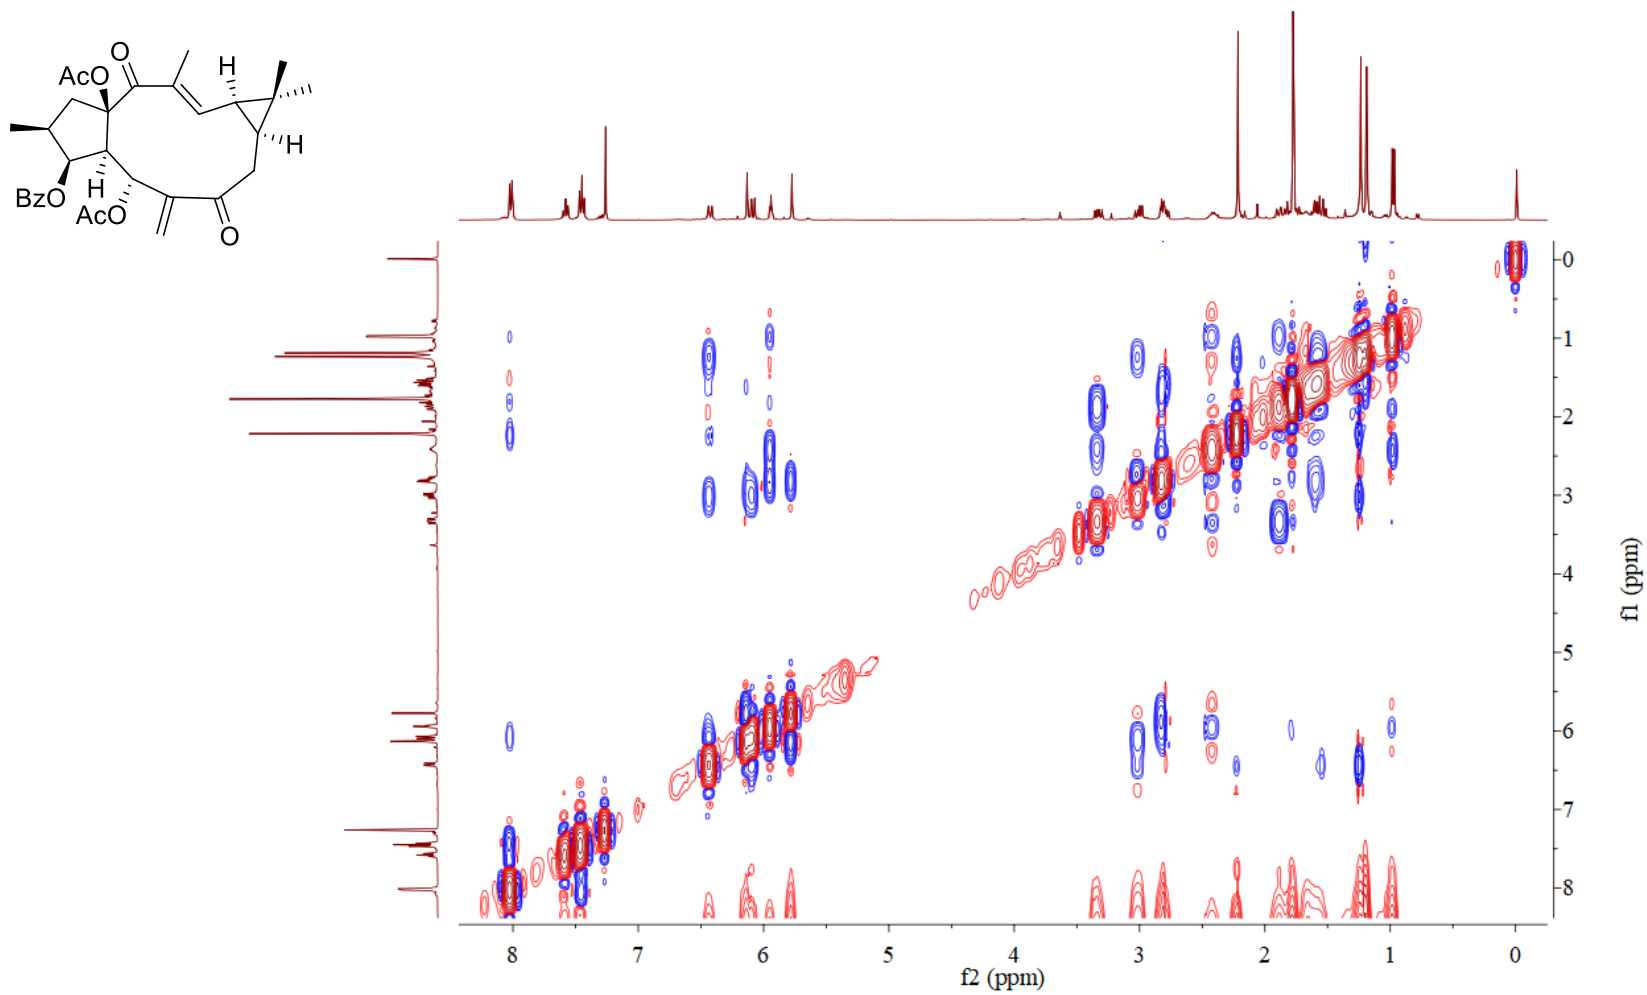

Figure S24. <sup>1</sup>H NMR spectrum of **4** in CDCl<sub>3</sub>.

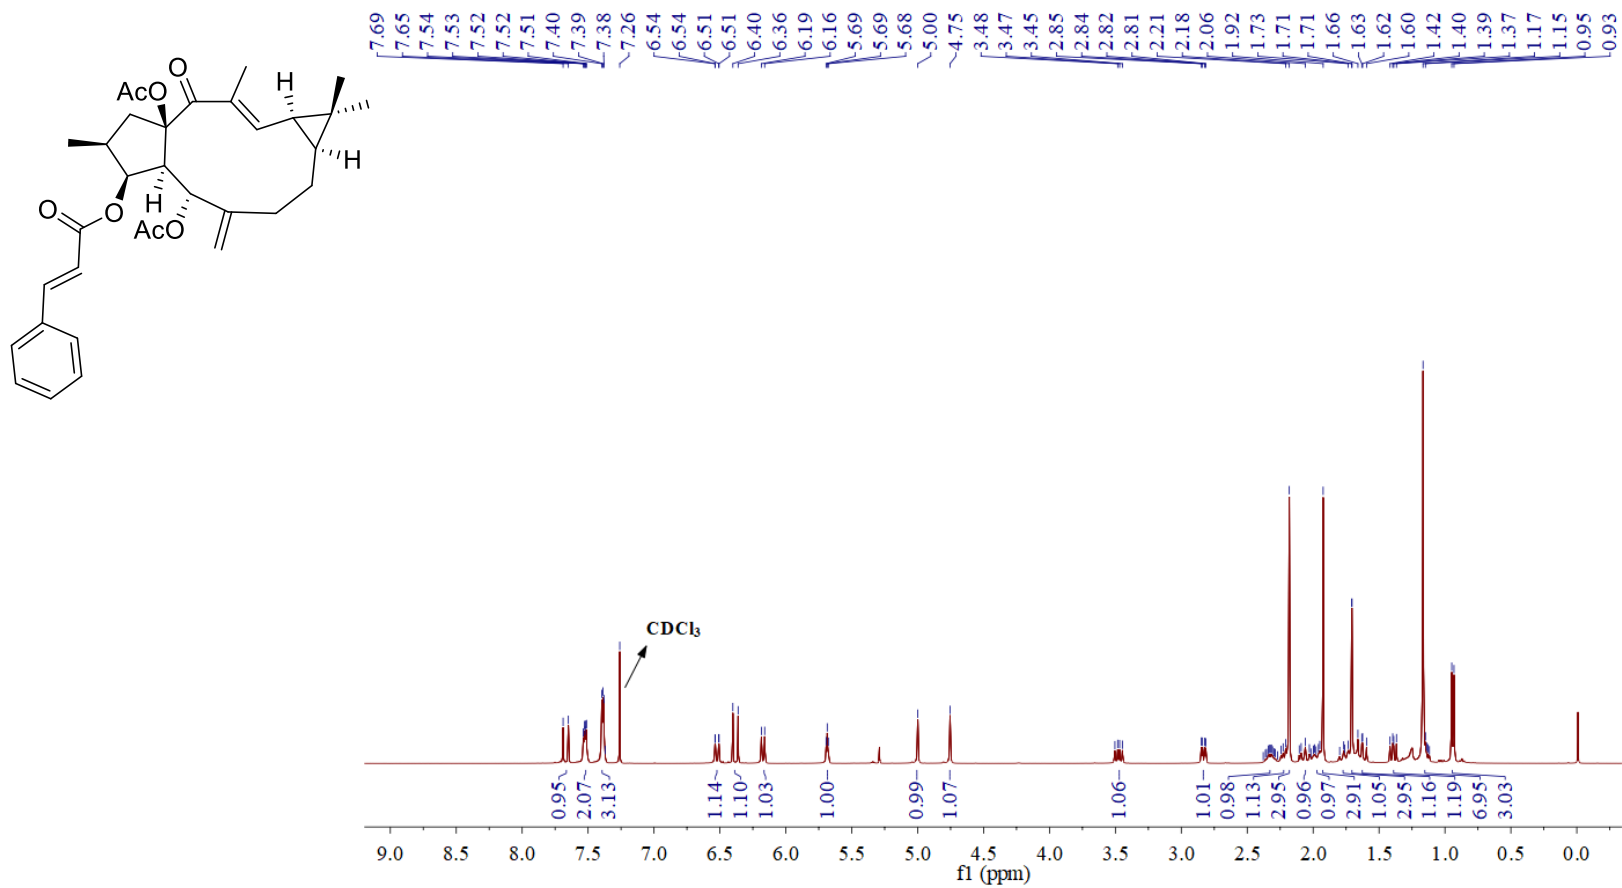

Figure S25.  $^{13}\text{C}$  NMR and DEPT 135 spectra of **4** in  $\text{CDCl}_3$ .

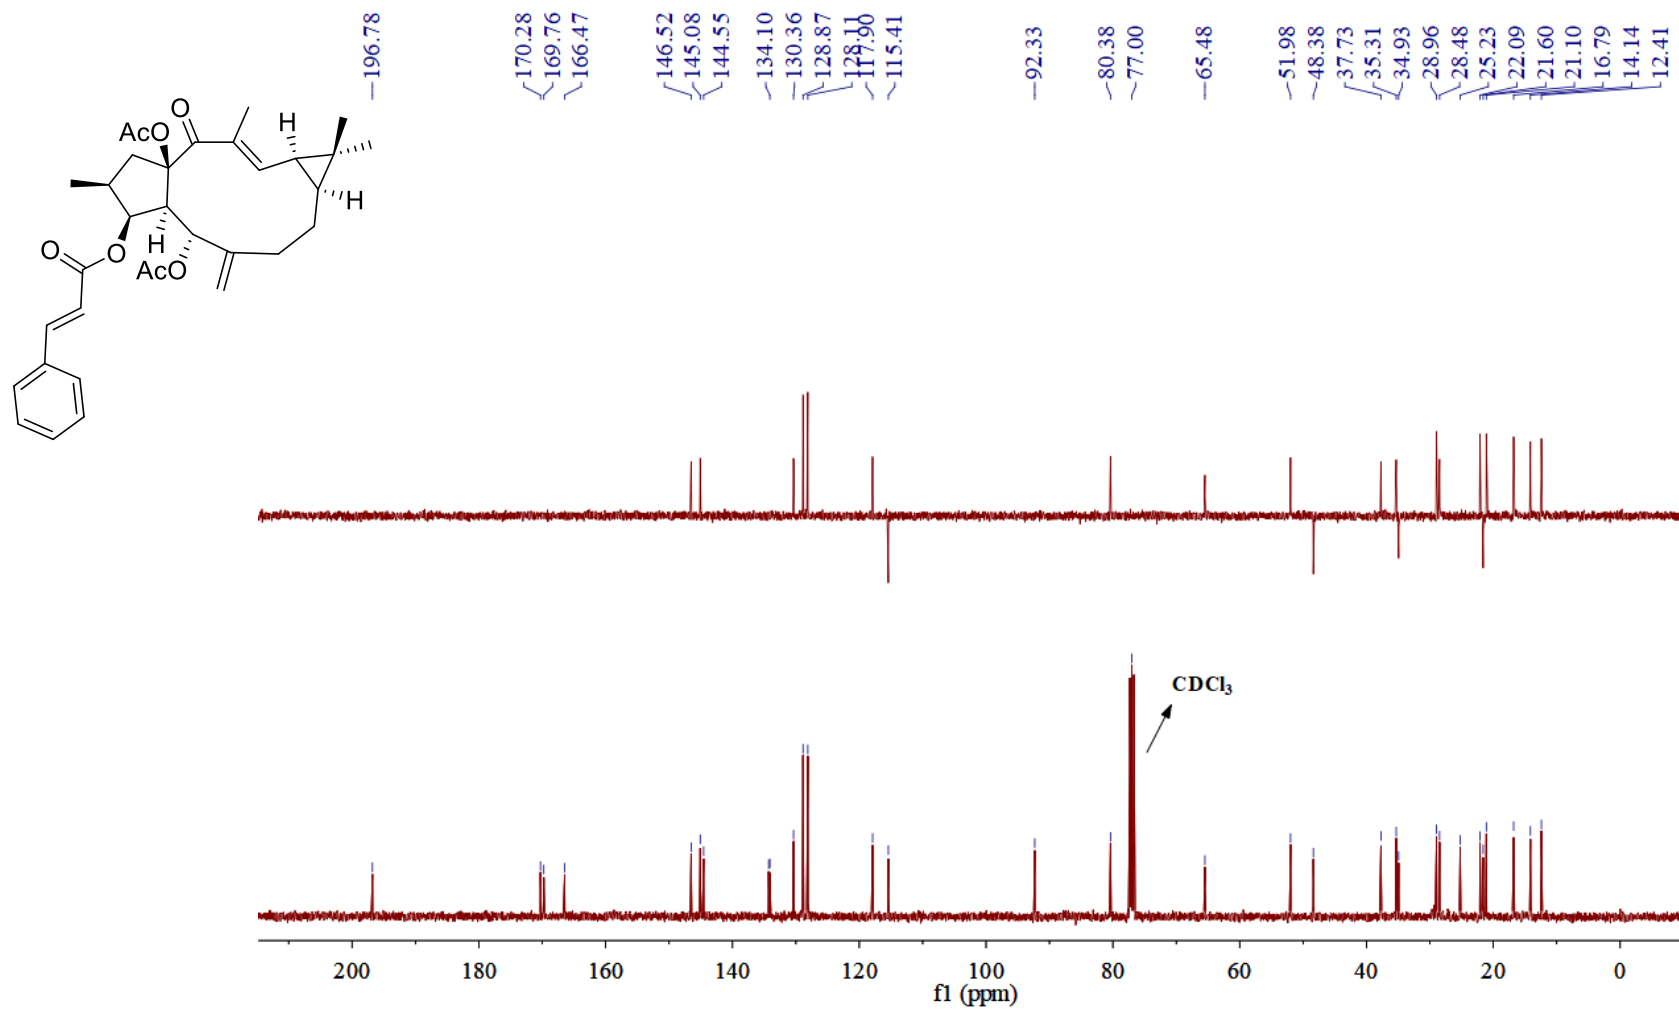

Figure S26. HSQC spectrum of **4** in CDCl<sub>3</sub>.

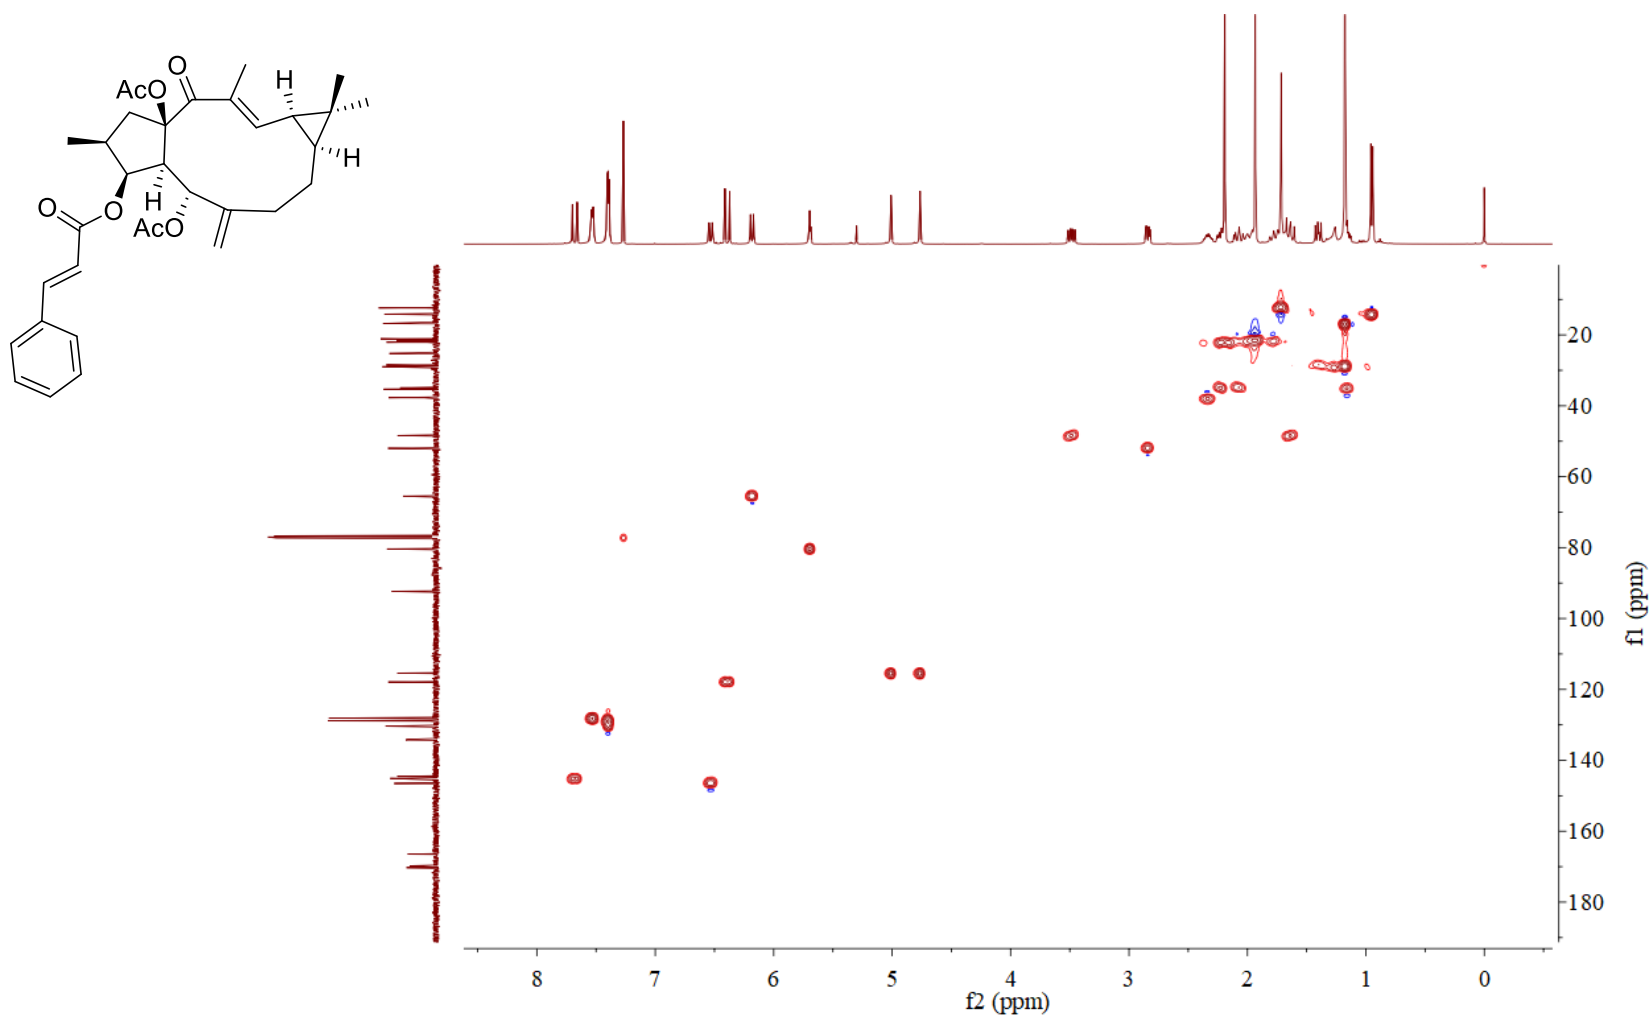

Figure S27. HMBC spectrum of **4** in CDCl<sub>3</sub>.

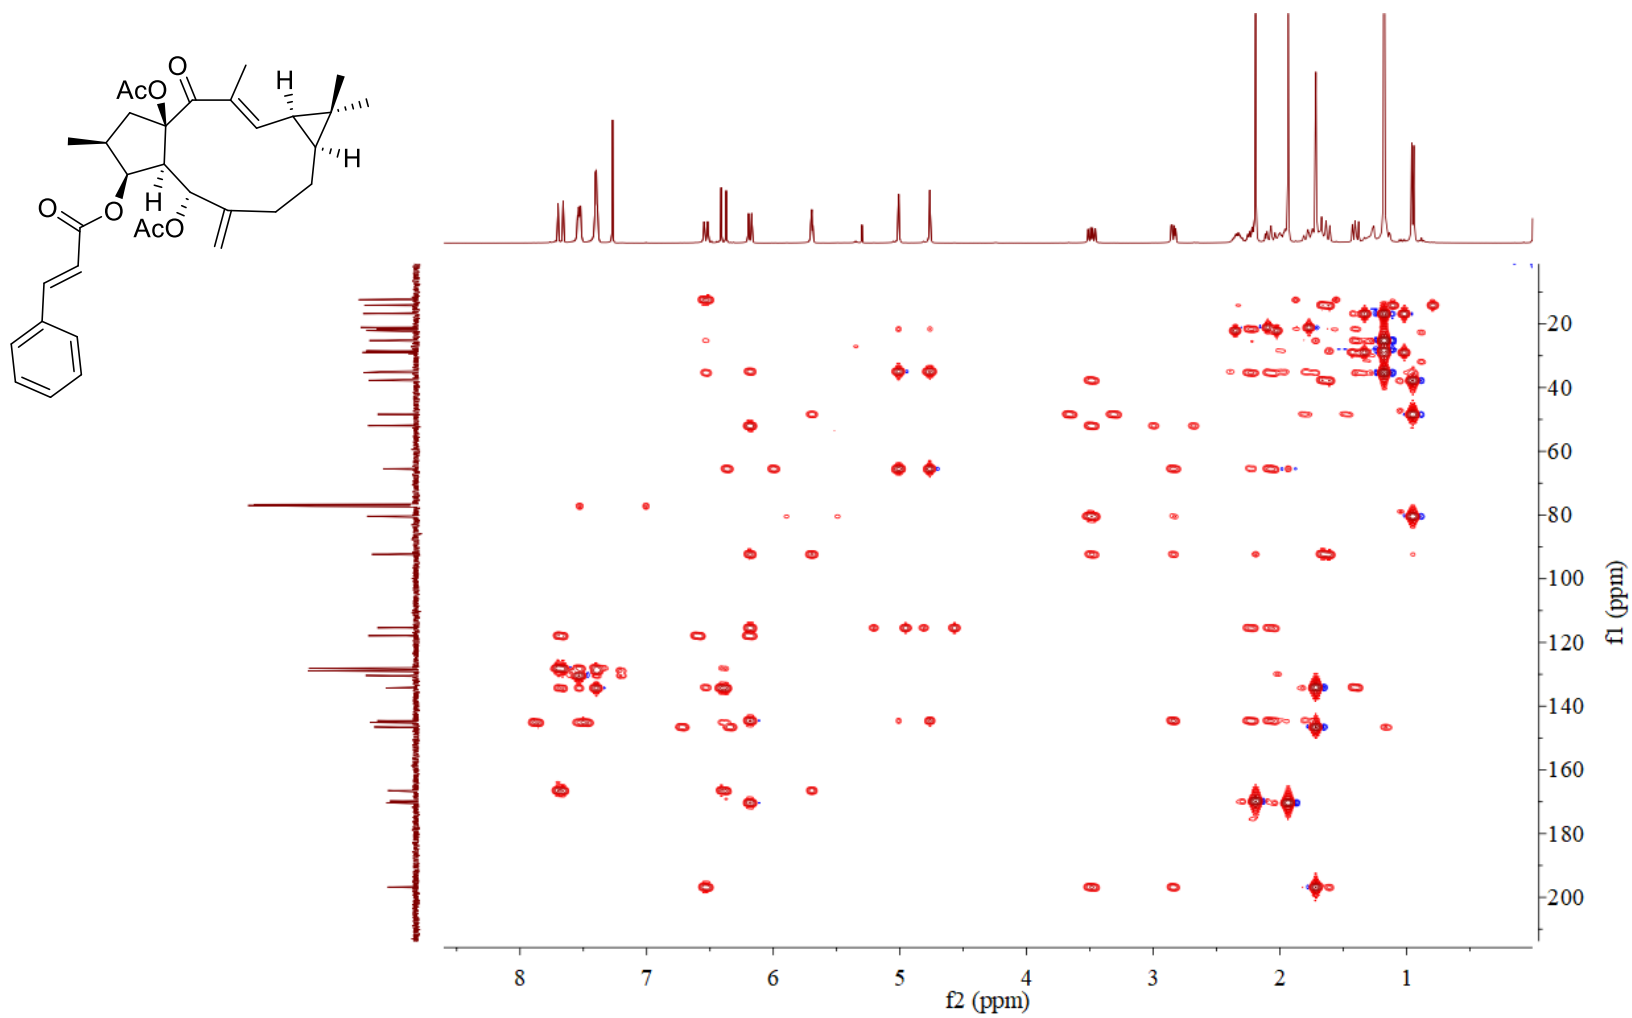

**Figure S28.**  $^1\text{H}$ - $^1\text{H}$  COSY spectrum of **4** in  $\text{CDCl}_3$ .

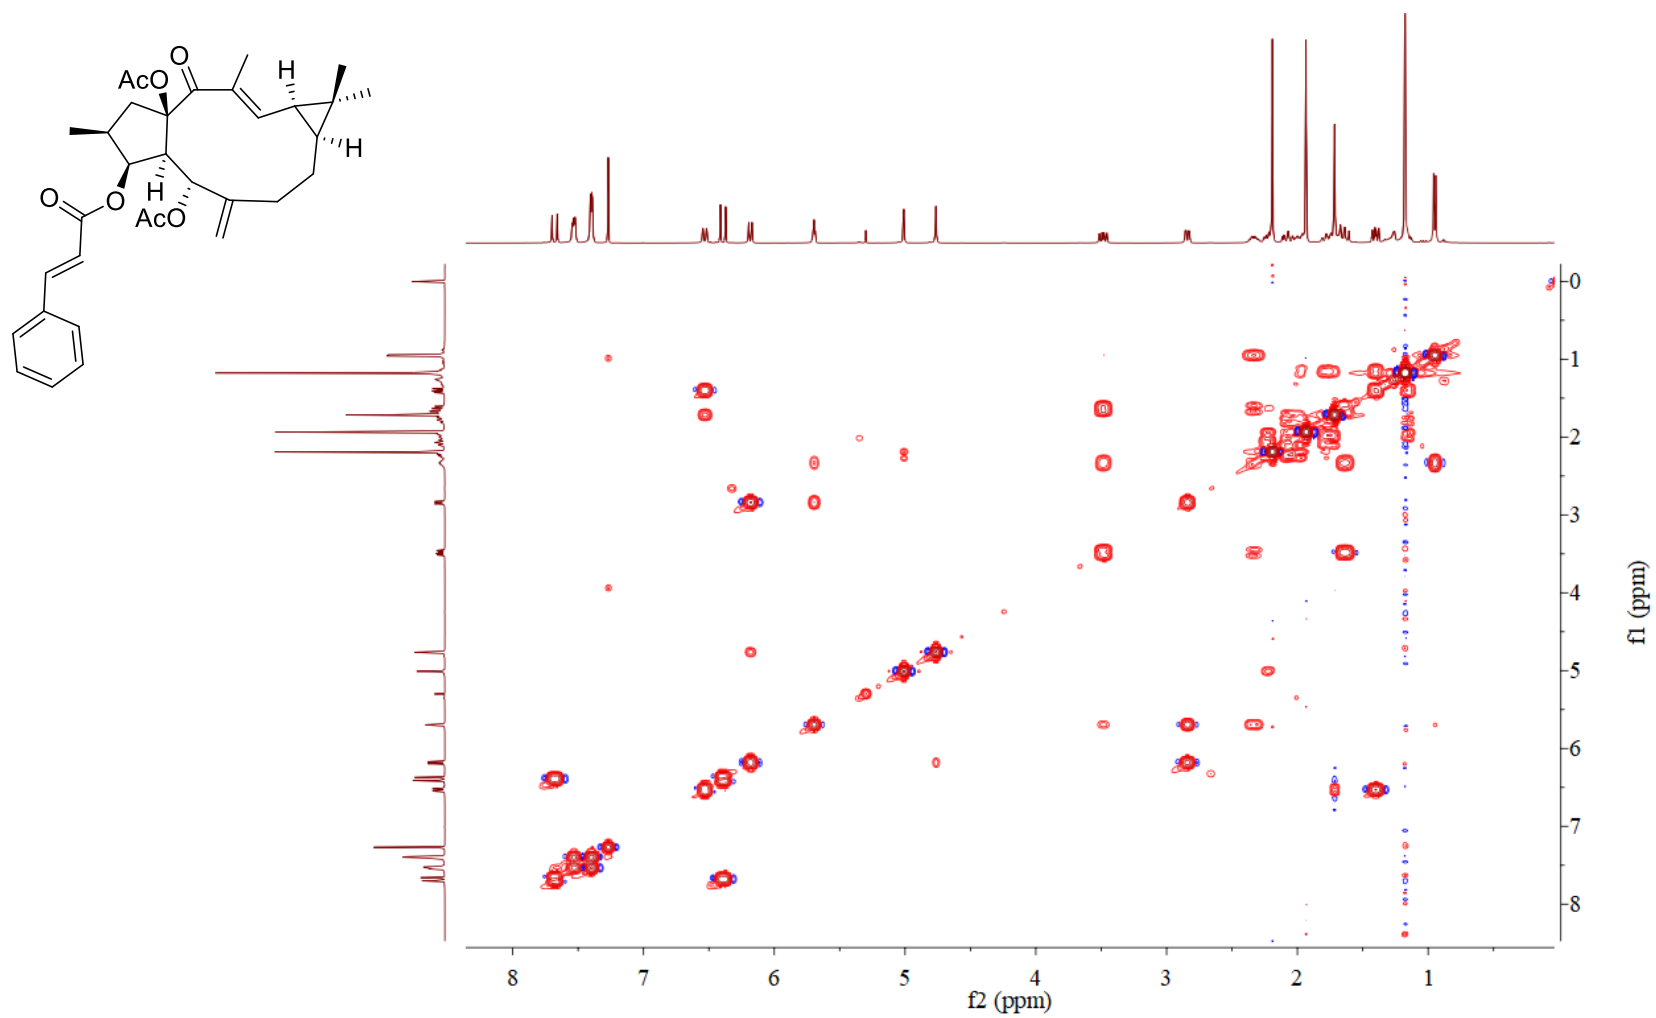

Figure S29. NOESY spectrum of **4** in CDCl<sub>3</sub>.

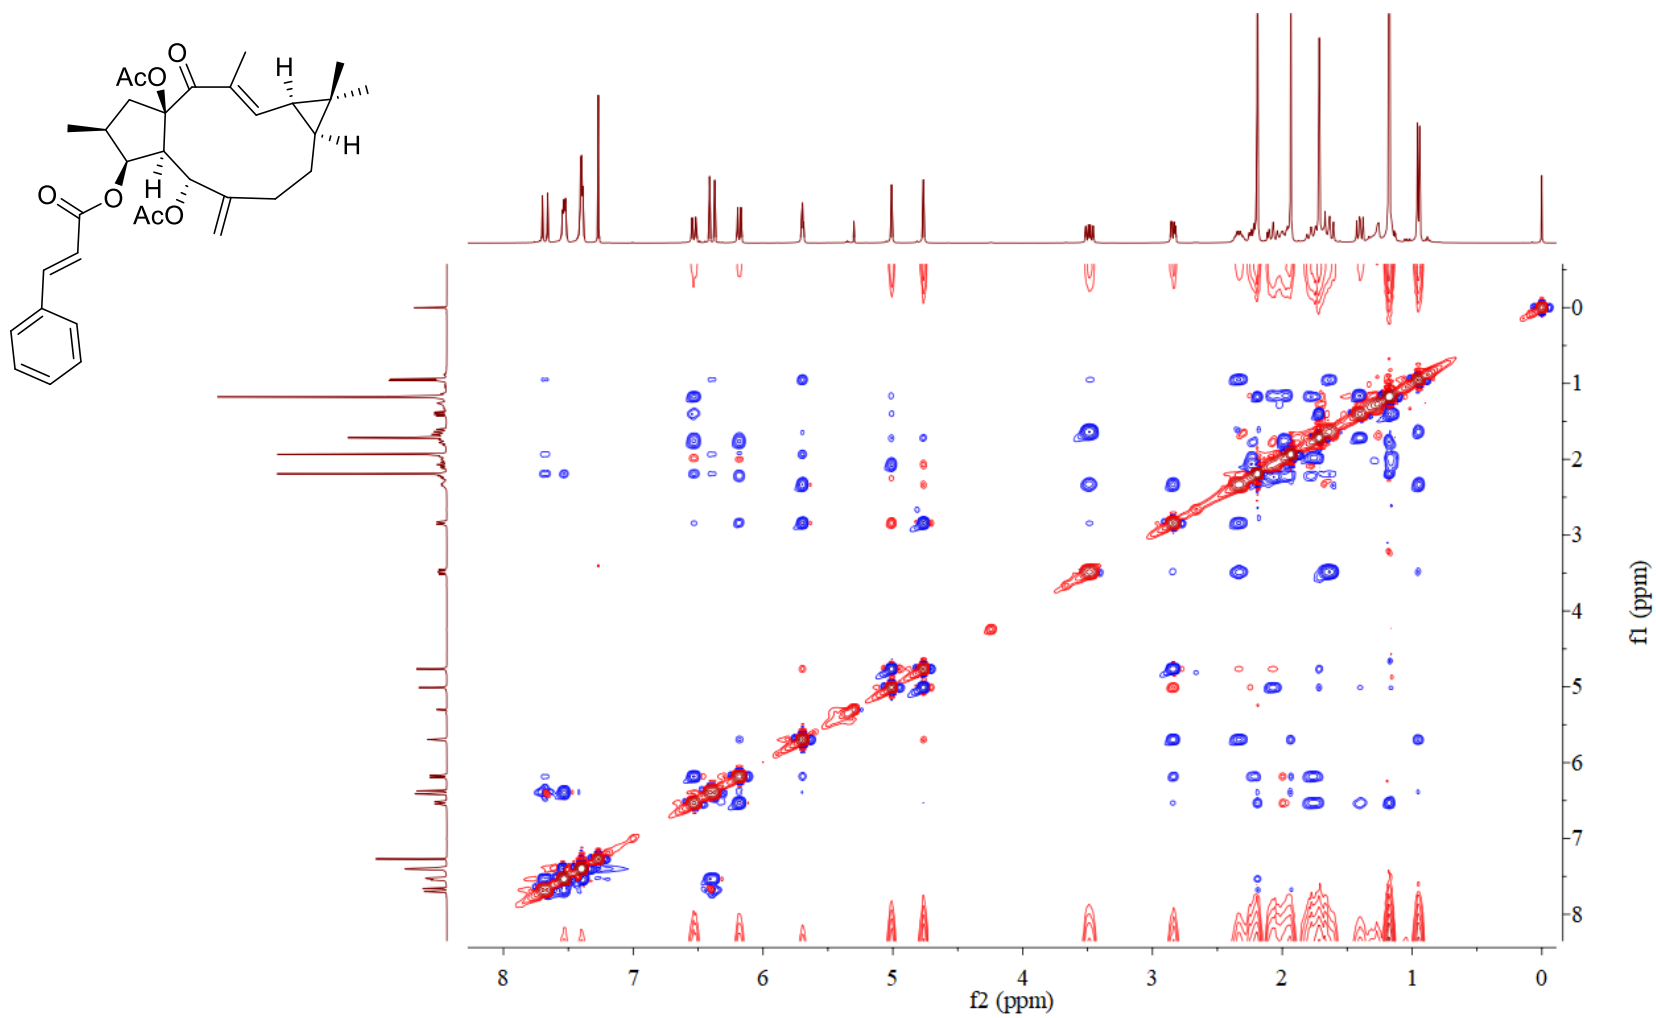

Figure S30. <sup>1</sup>H NMR spectrum of **5** in CDCl<sub>3</sub>.

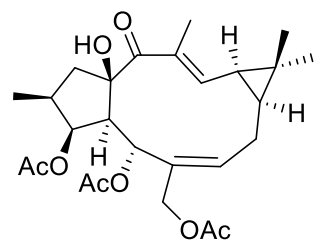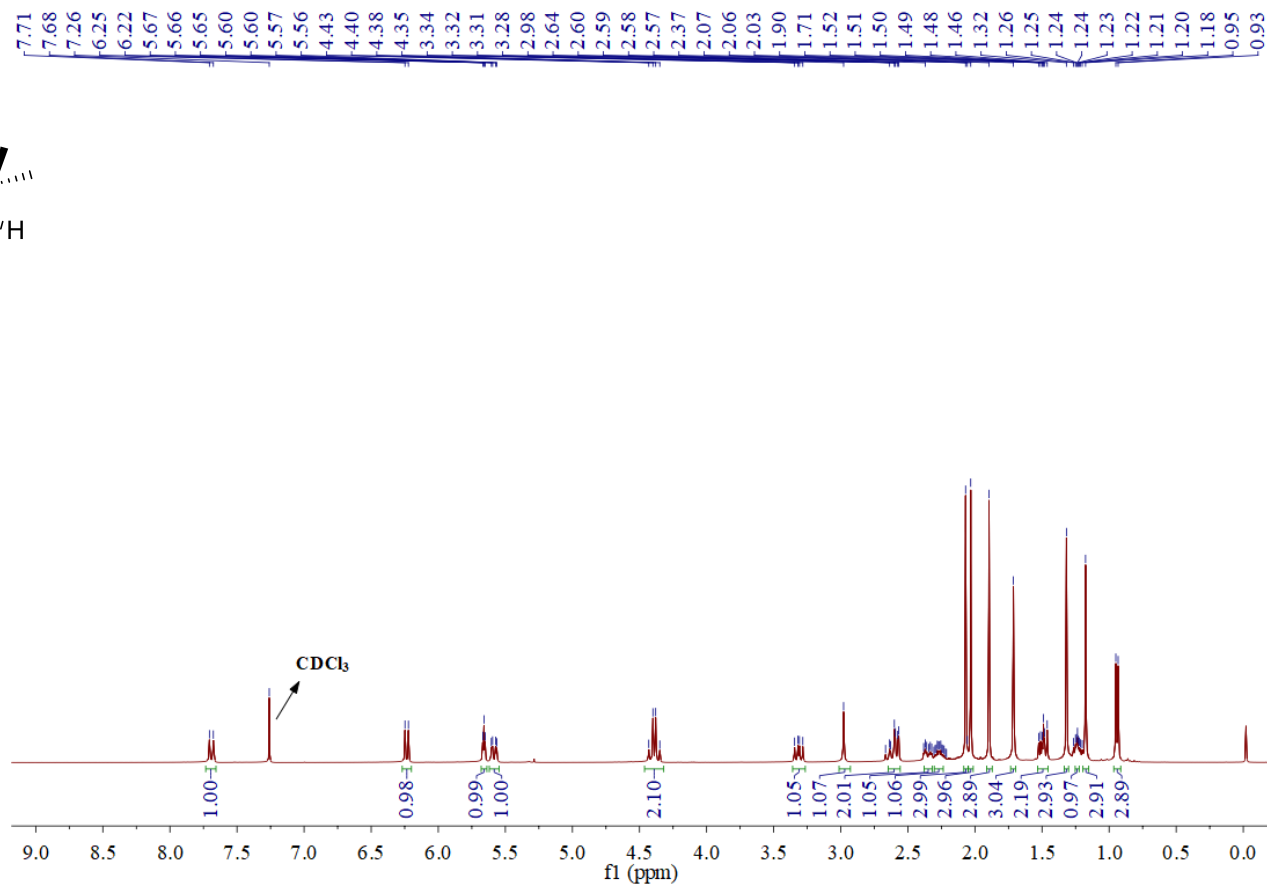



Figure S31.  $^{13}\text{C}$  NMR and DEPT 135 spectra of **5** in  $\text{CDCl}_3$ .

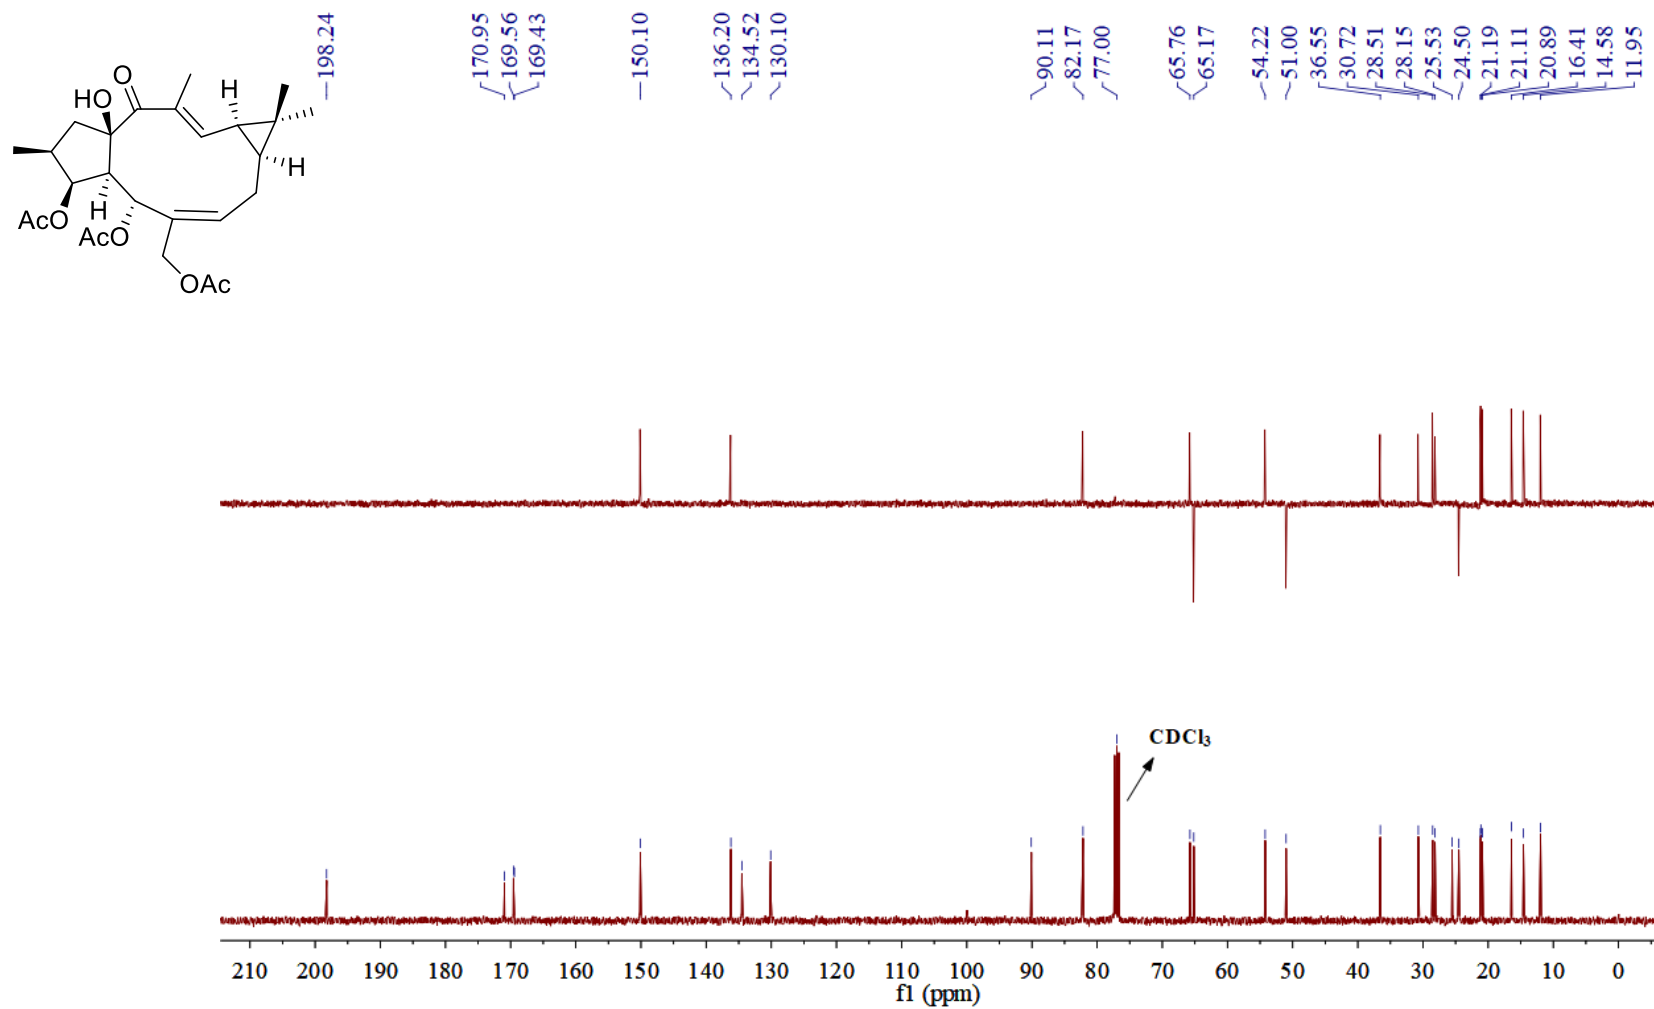

Figure S32. HSQC spectrum of **5** in CDCl<sub>3</sub>.

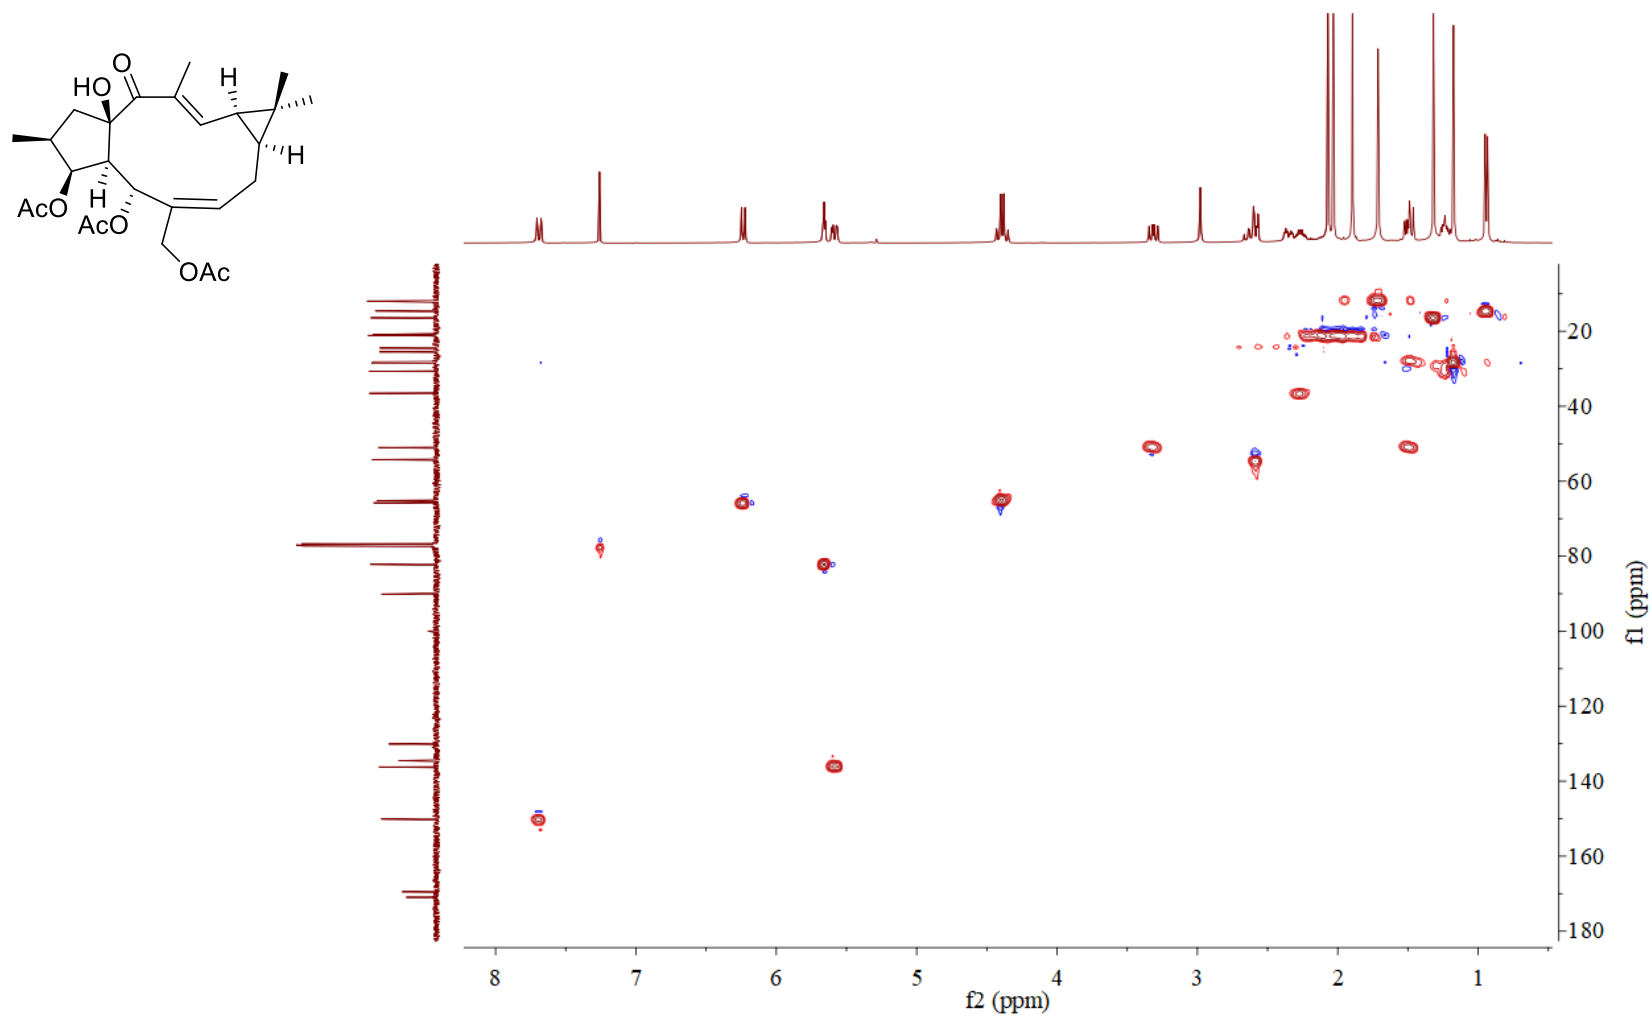

Figure S33. HMBC spectrum of **5** in CDCl<sub>3</sub>.

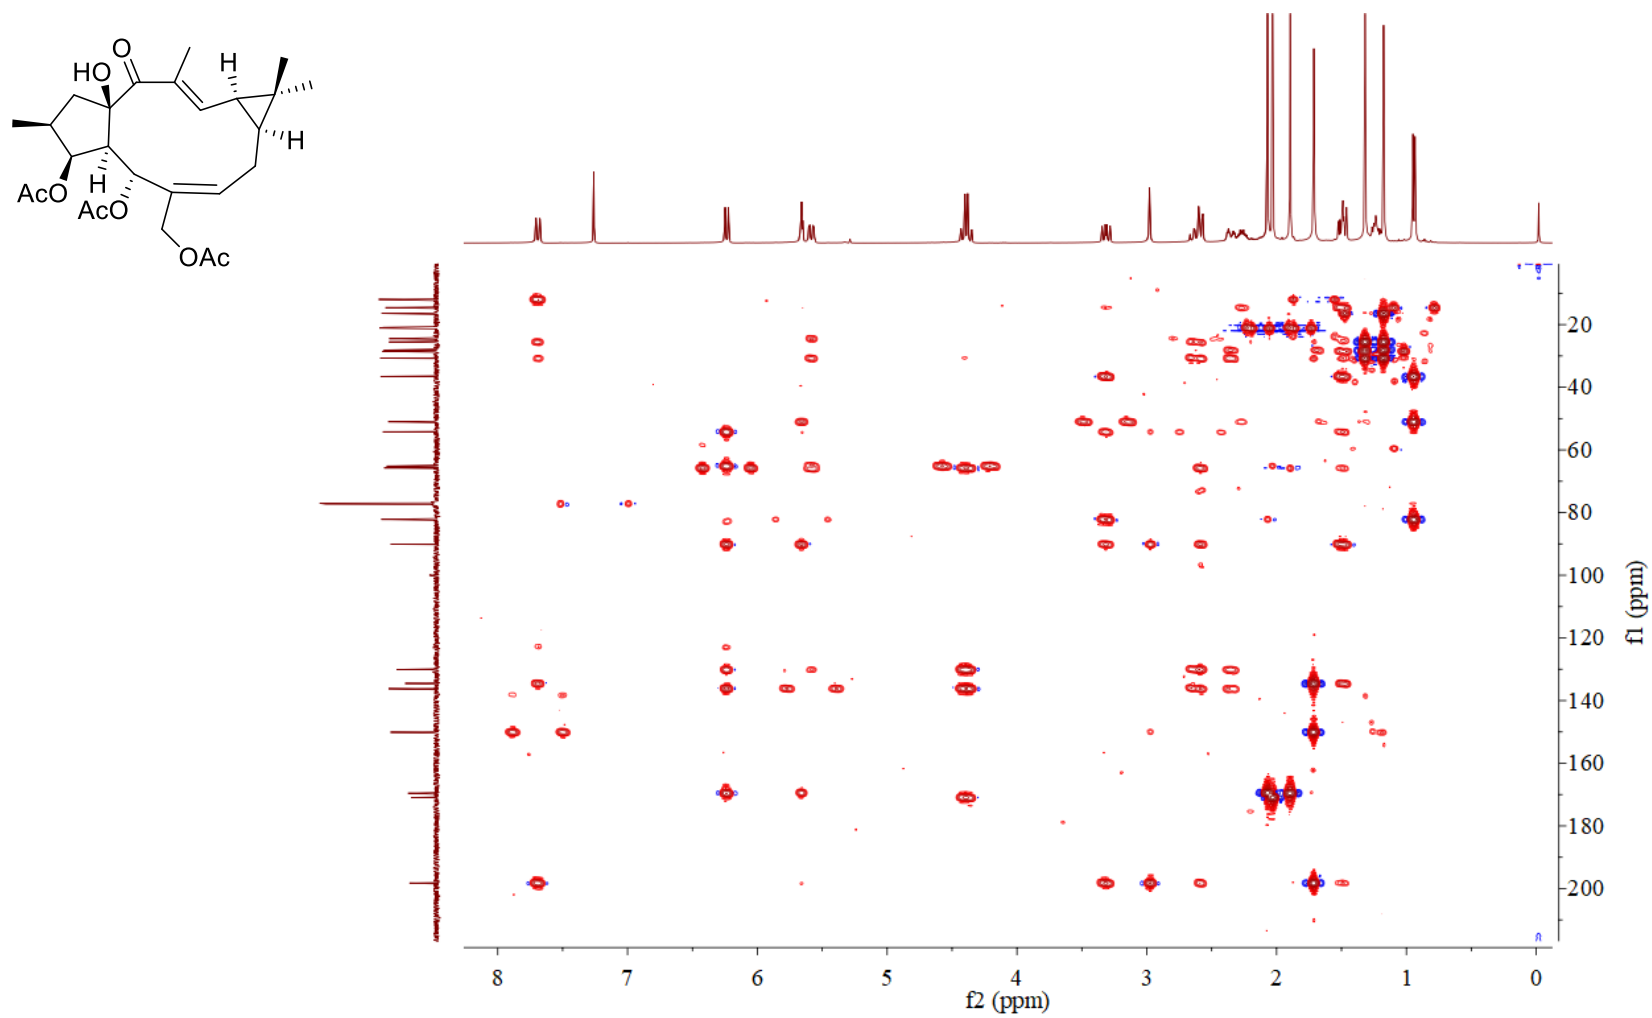

**Figure S34.**  $^1\text{H}$ - $^1\text{H}$  COSY spectrum of **5** in  $\text{CDCl}_3$ .

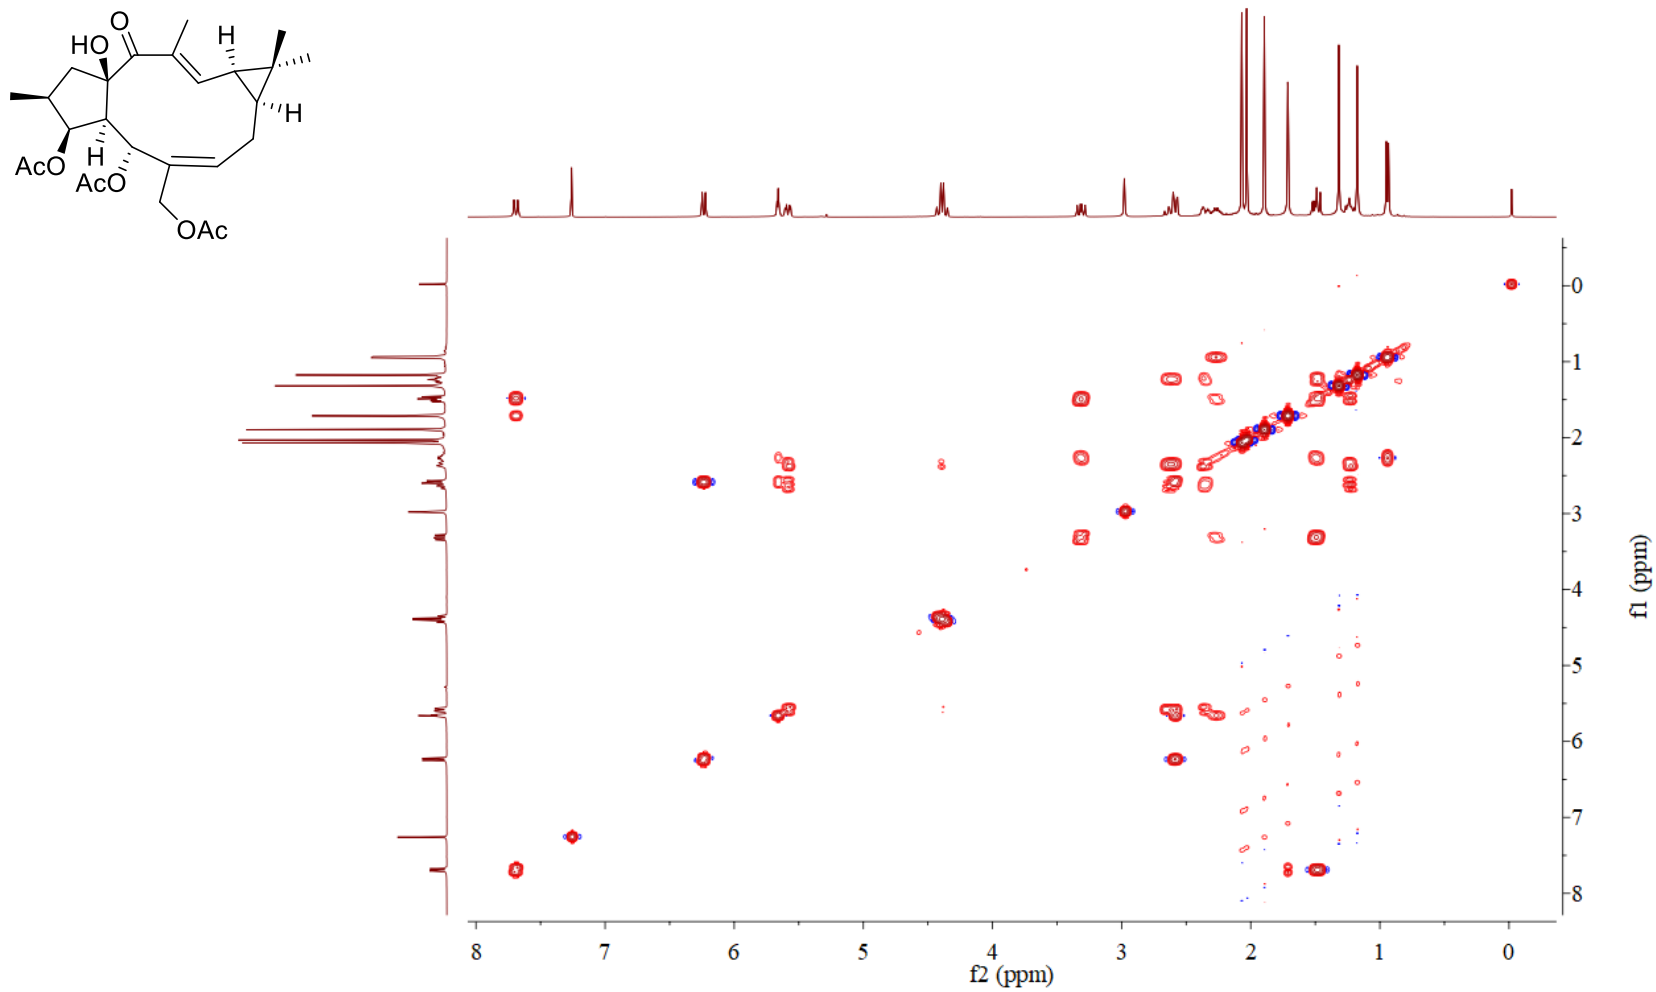

Figure S35. NOESY spectrum of **5** in CDCl<sub>3</sub>.

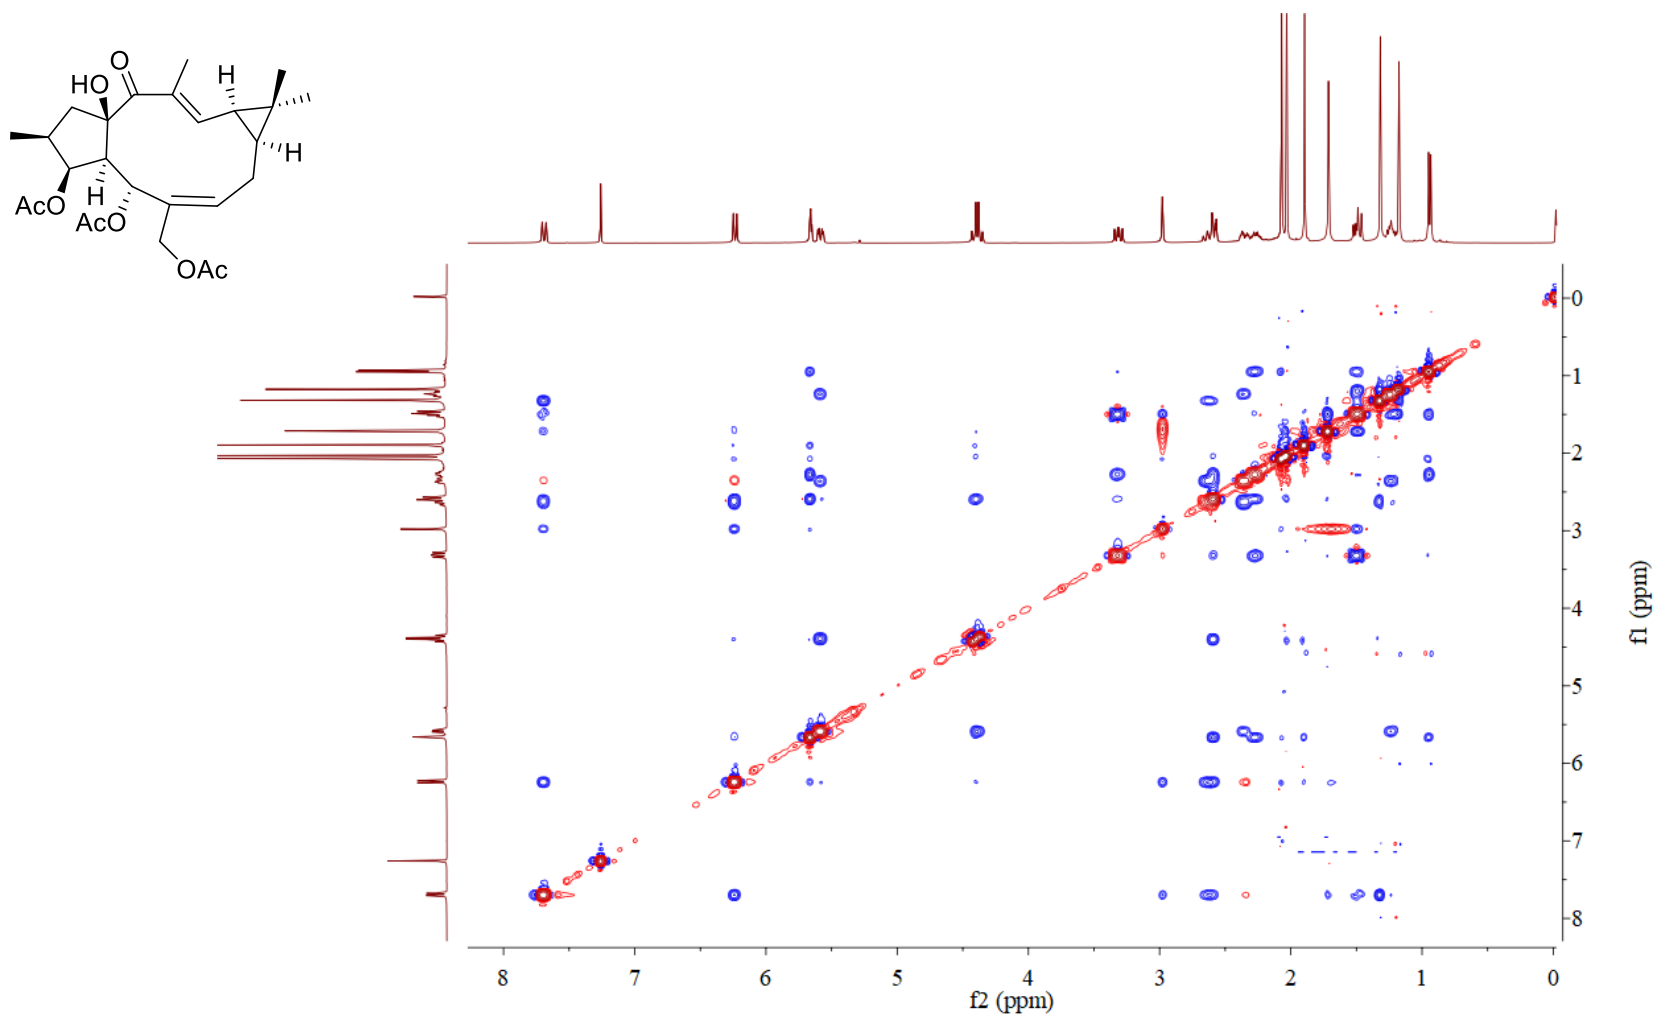

Figure S36. <sup>1</sup>H NMR spectrum of **20** in CDCl<sub>3</sub>.

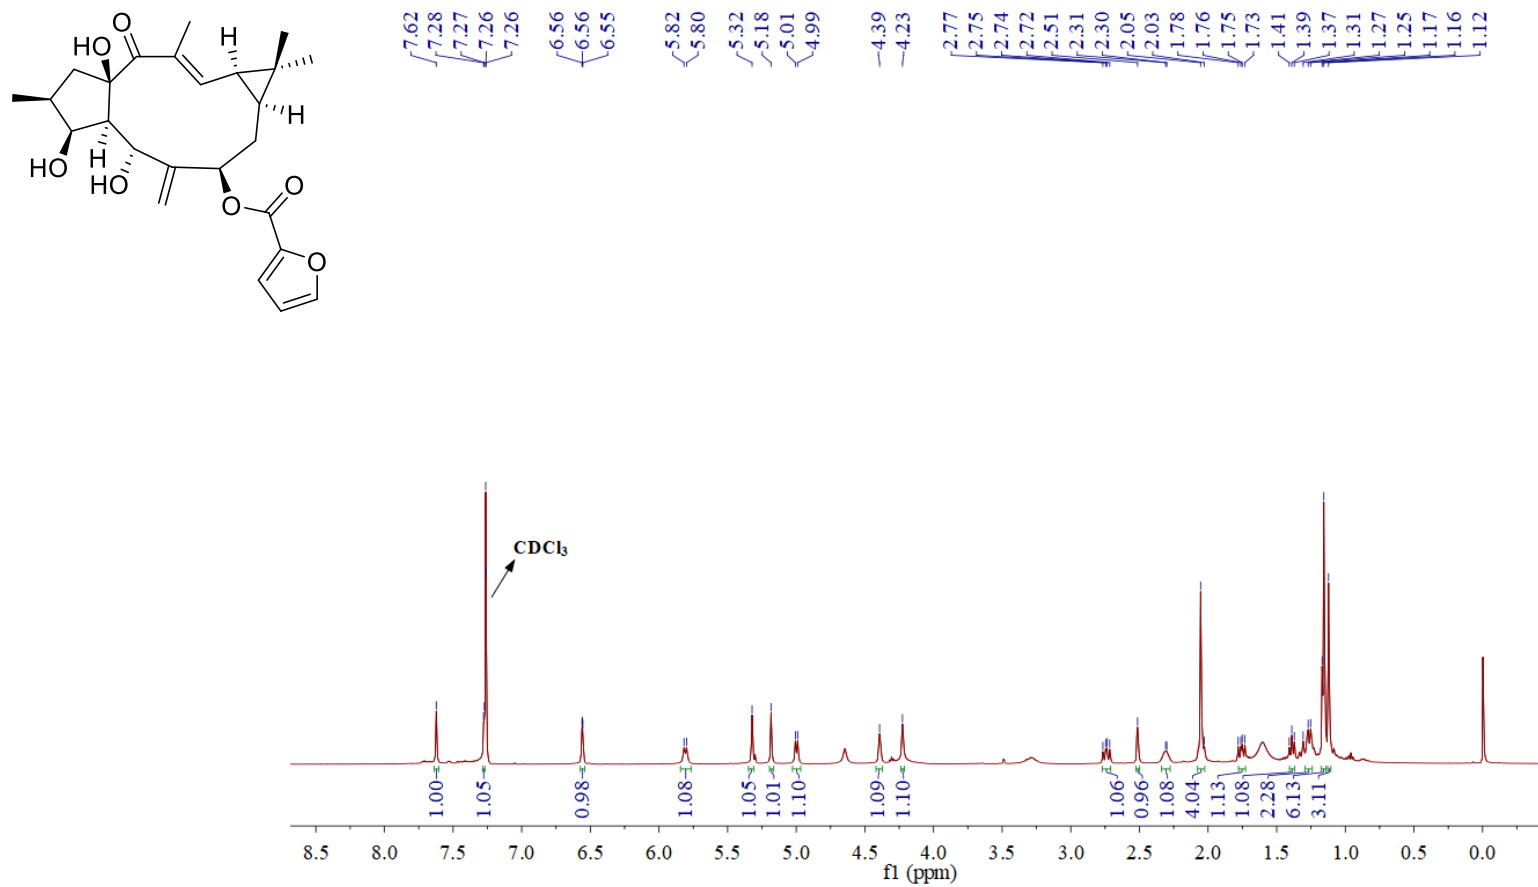

Figure S37.  $^{13}\text{C}$  NMR and DEPT 135 spectra of **20** in  $\text{CDCl}_3$ .

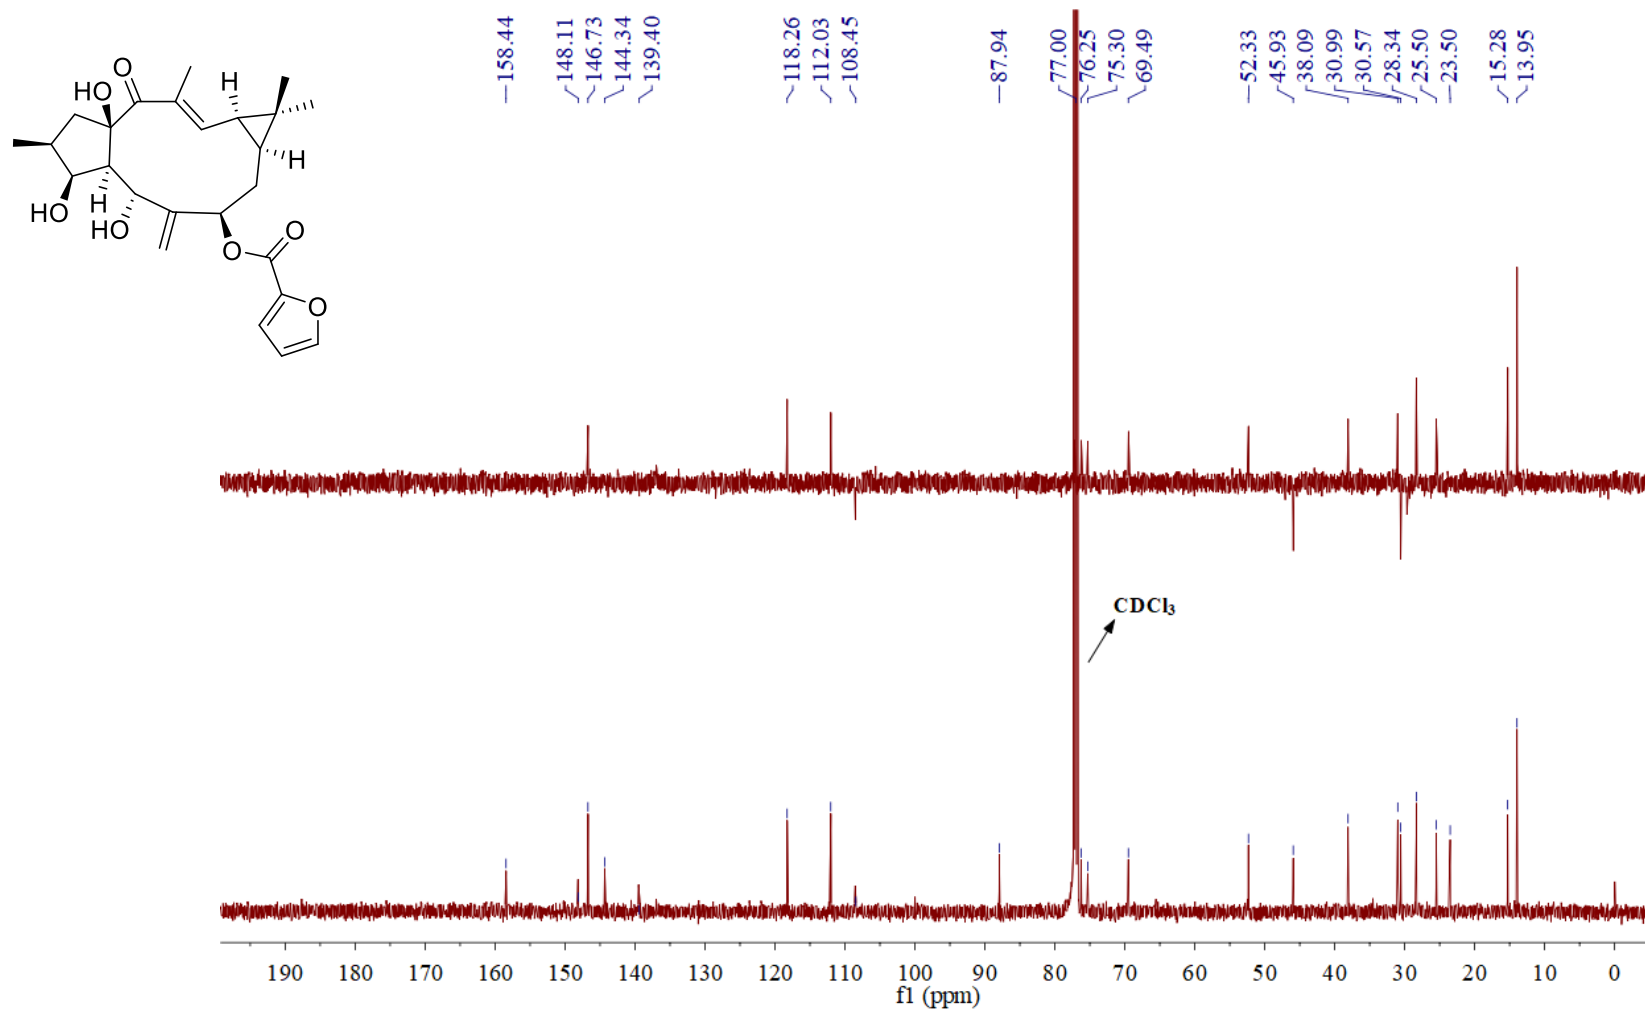

Figure S38. HSQC spectrum of **20** in CDCl<sub>3</sub>.

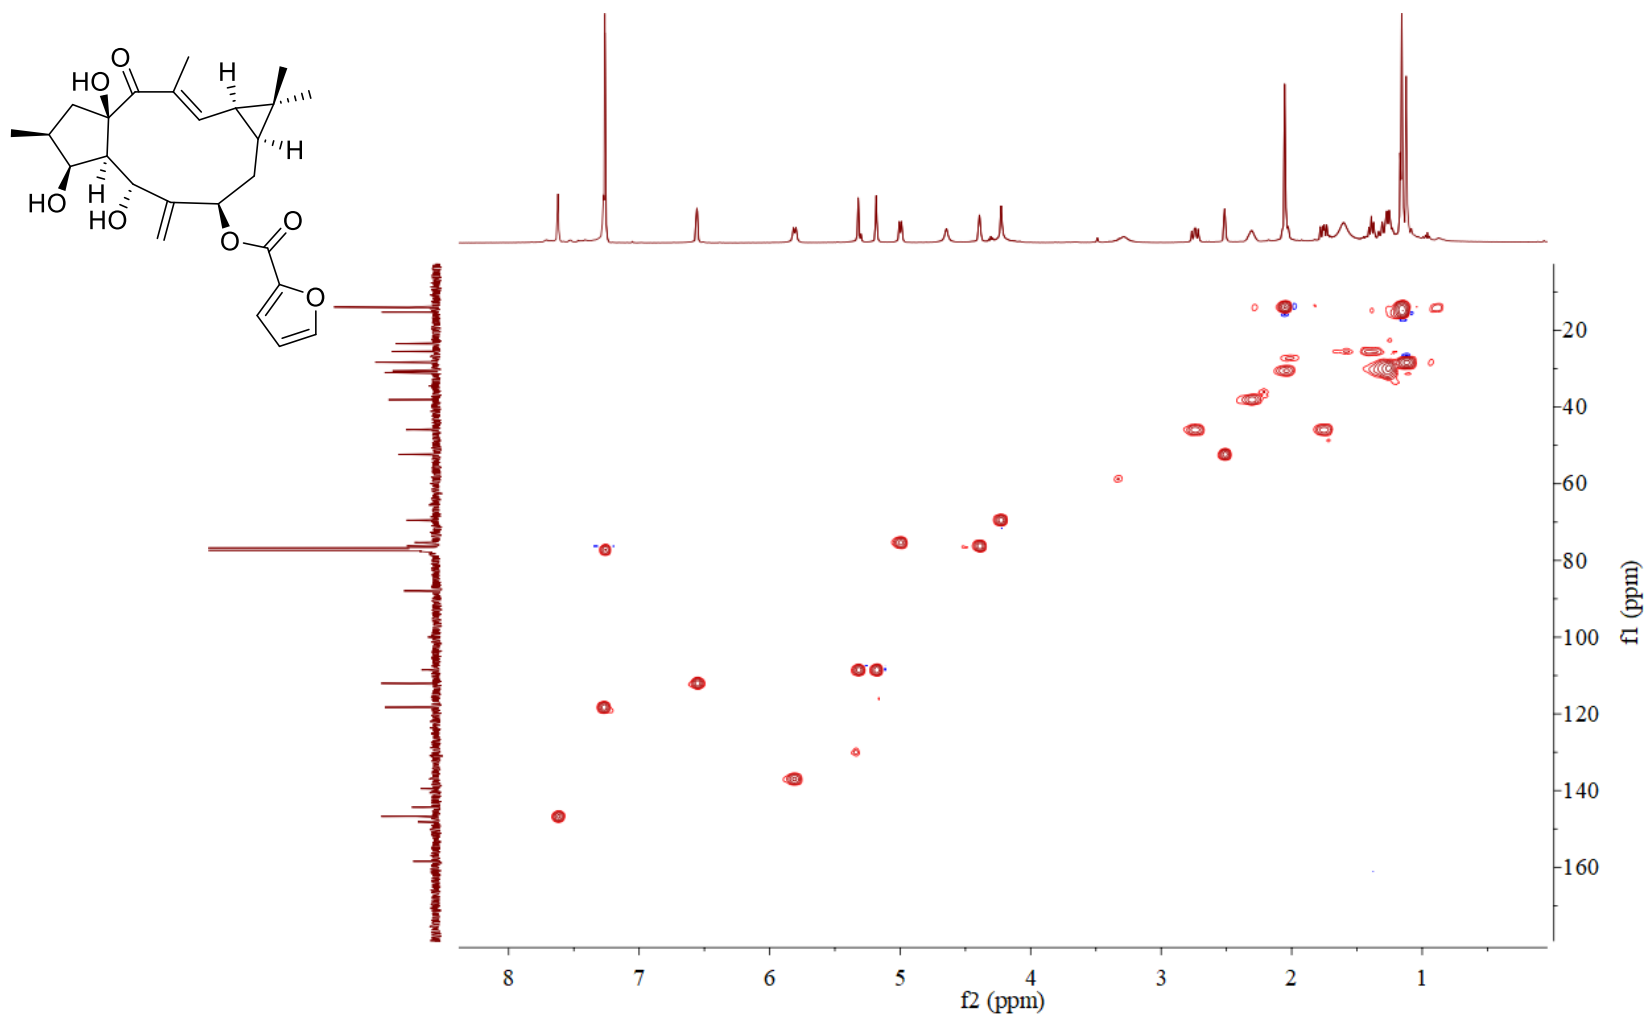



Figure S39. HMBC spectrum of **20** in CDCl<sub>3</sub>.

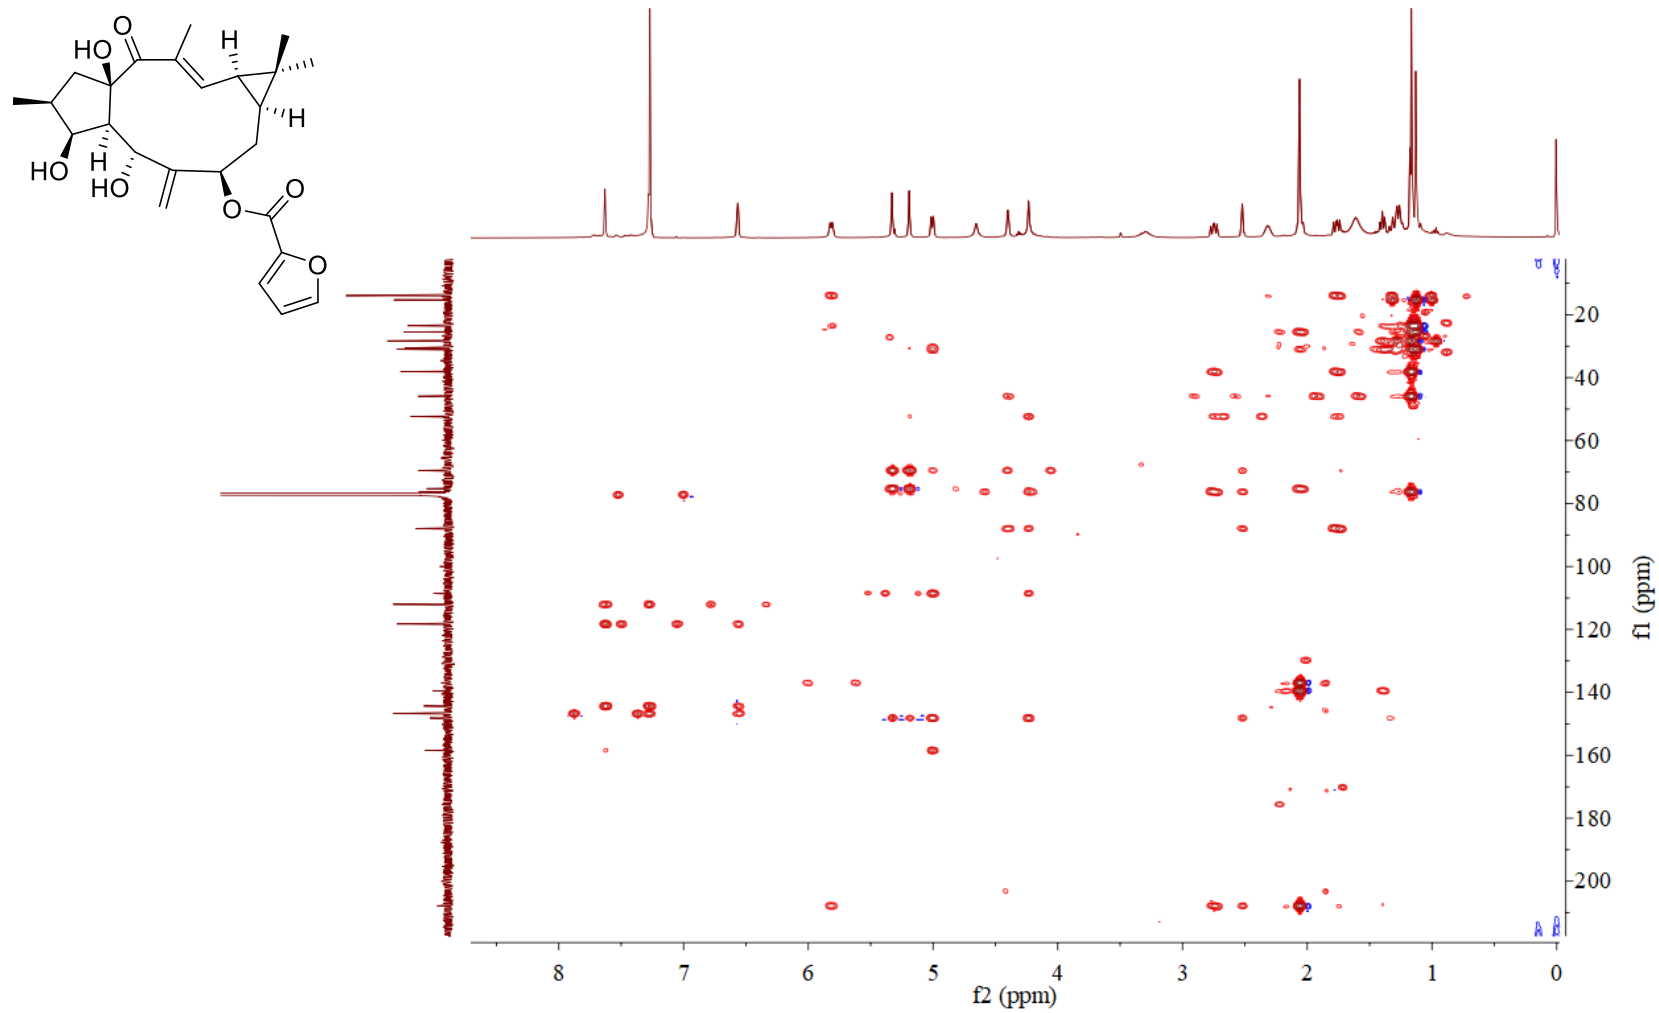

Figure S40.  $^1\text{H}$ - $^1\text{H}$  COSY spectrum of **20** in  $\text{CDCl}_3$ .

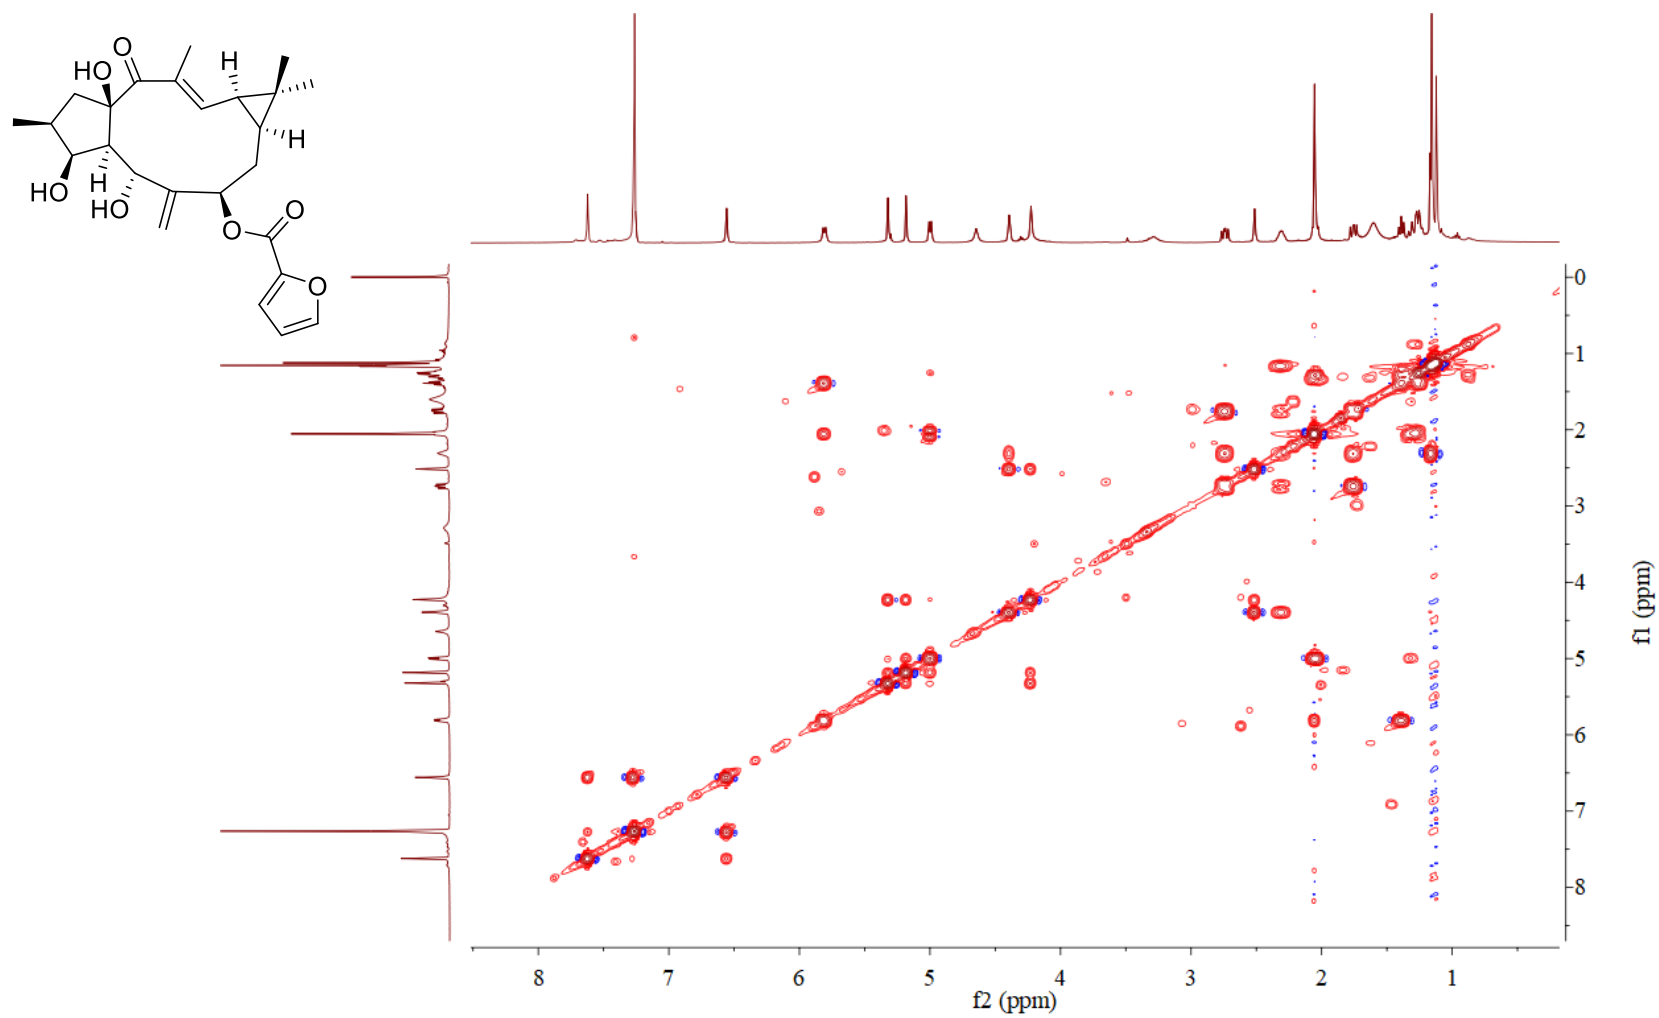

Figure S41.  $^1\text{H}$  NMR spectra of **21** in  $\text{CDCl}_3$ .

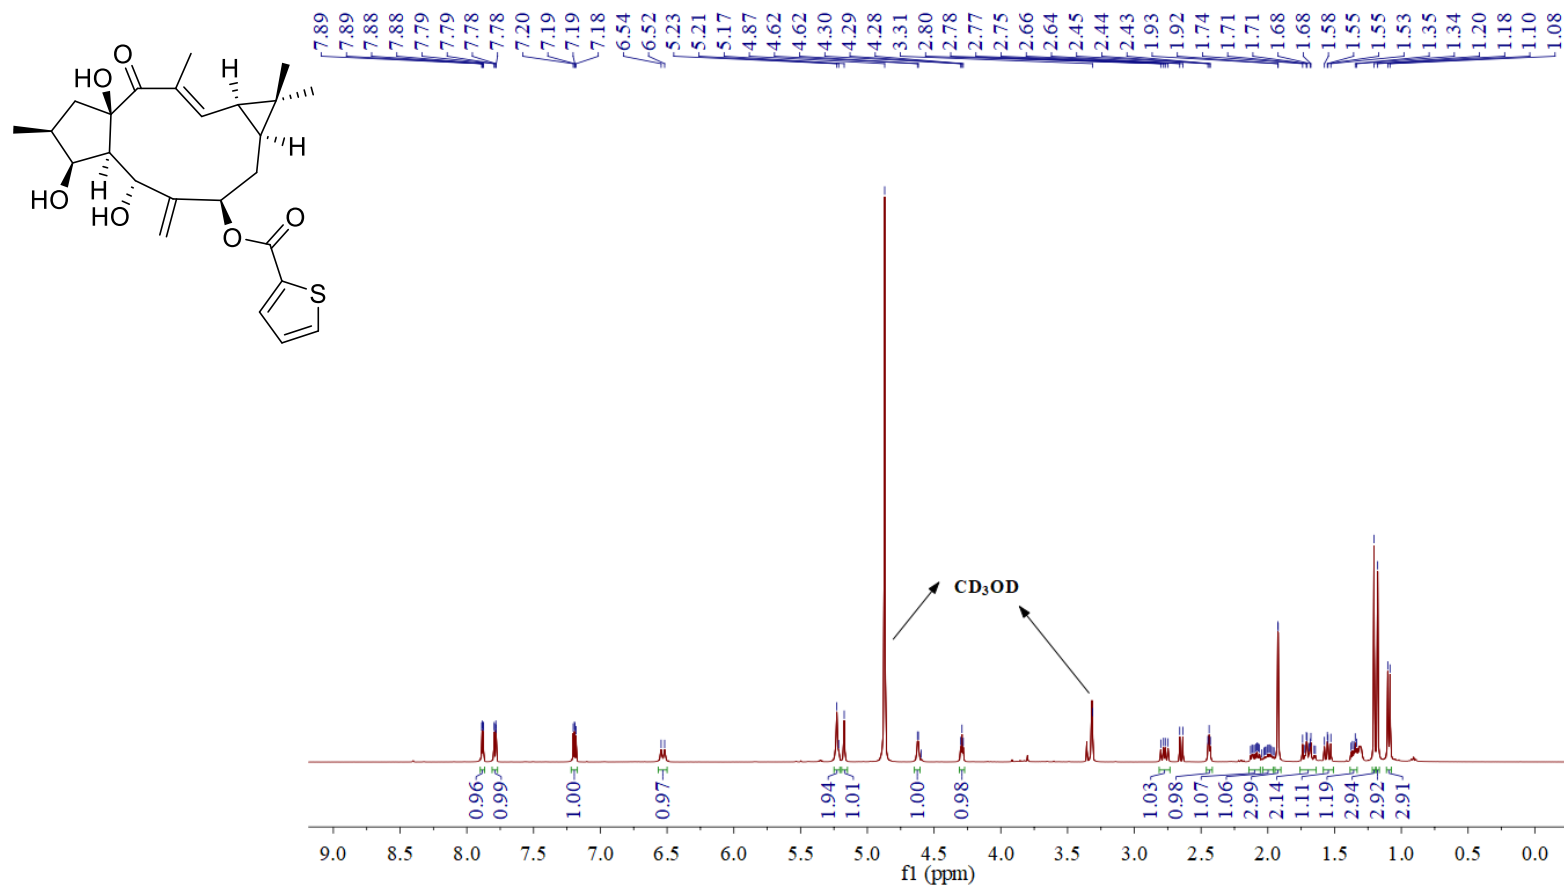

Figure S42.  $^{13}\text{C}$  NMR and DEPT 135 spectra of **21** in  $\text{CDCl}_3$ .

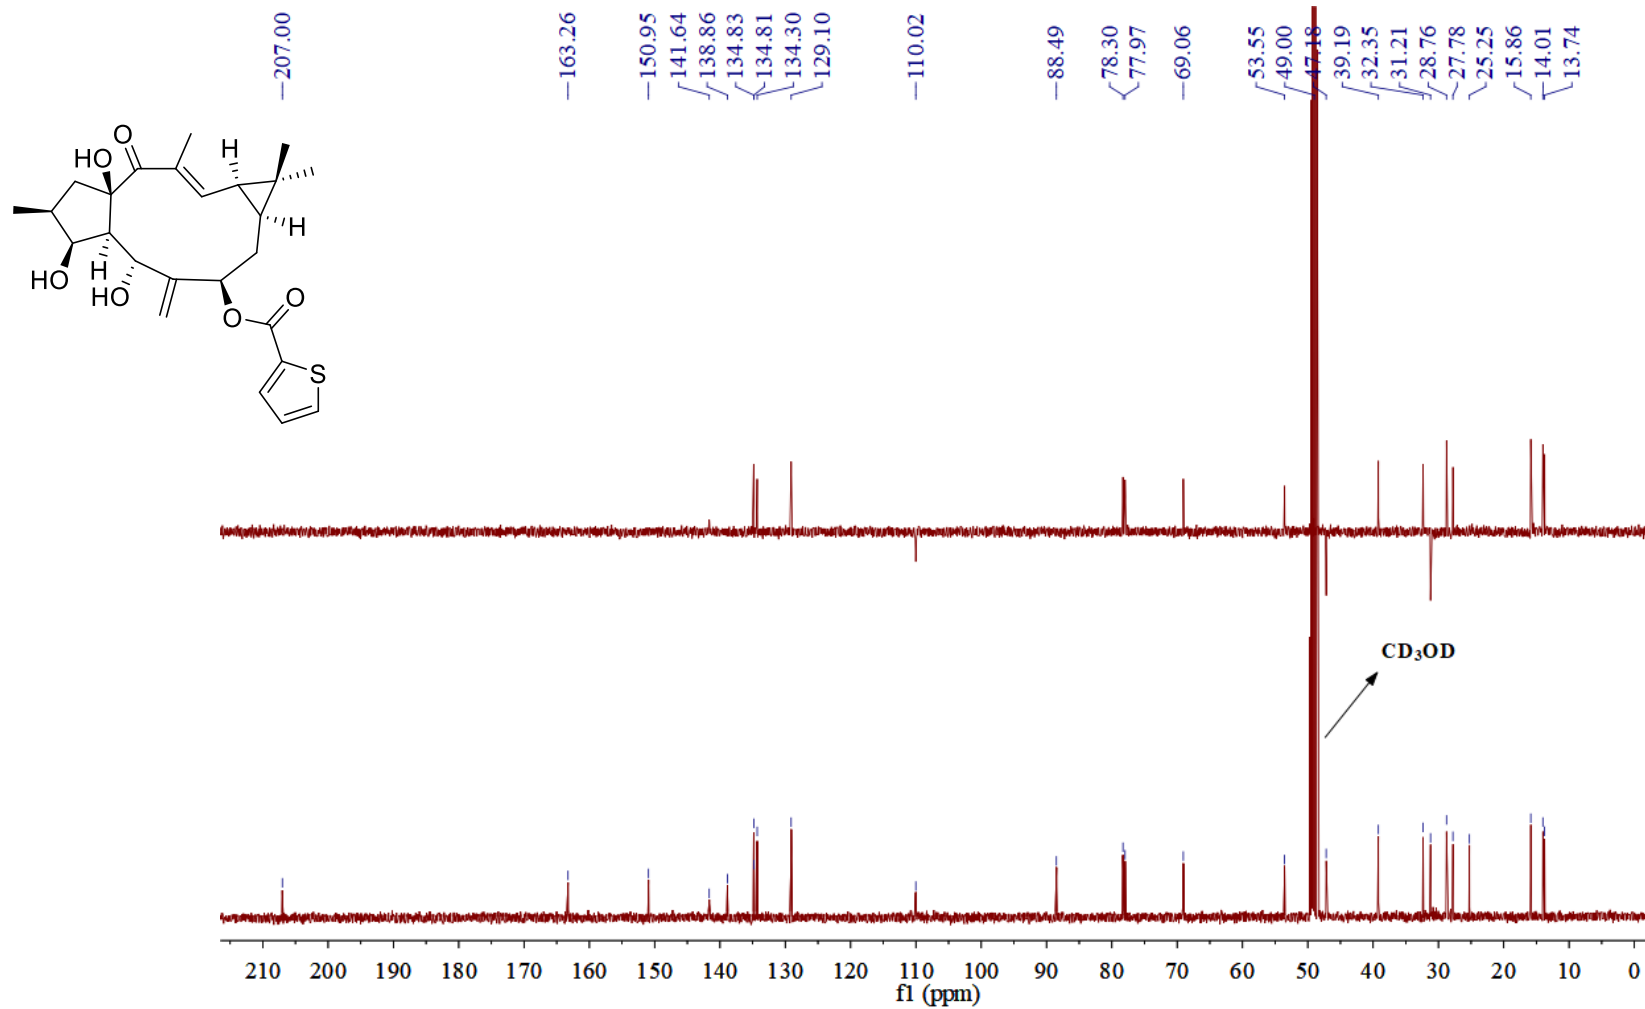

Figure S43. HSQC spectrum of **21** in CDCl<sub>3</sub>.

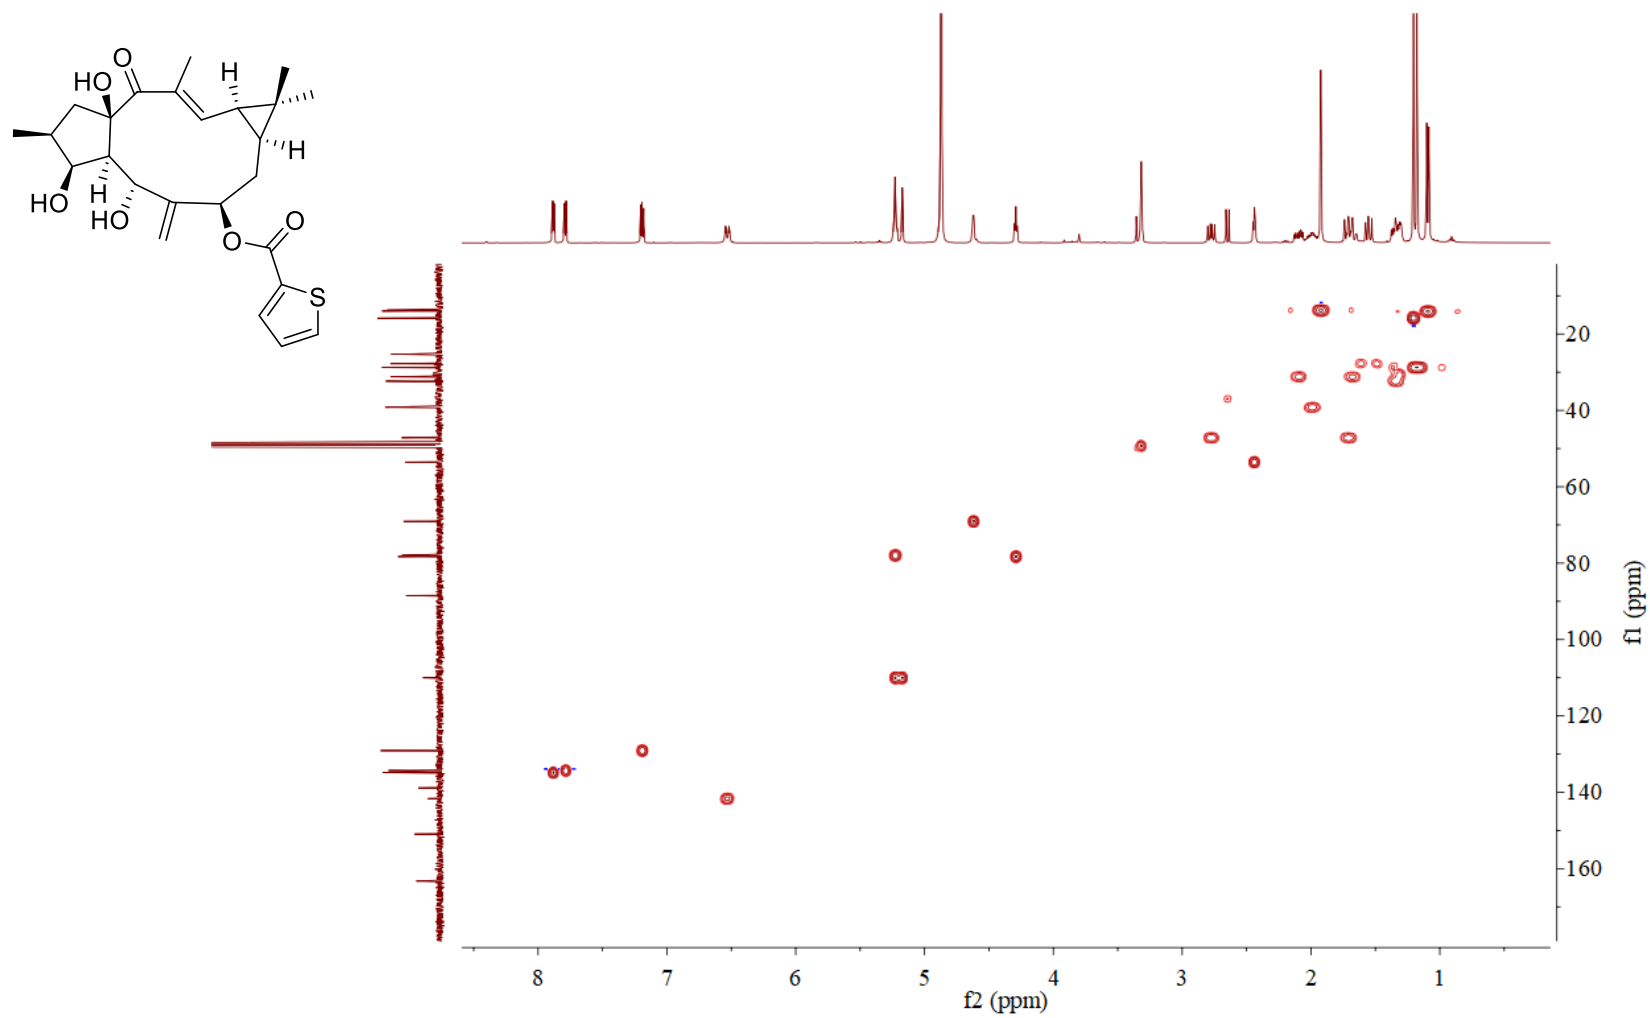

Figure S44. HMBC spectrum of **21** in CDCl<sub>3</sub>.

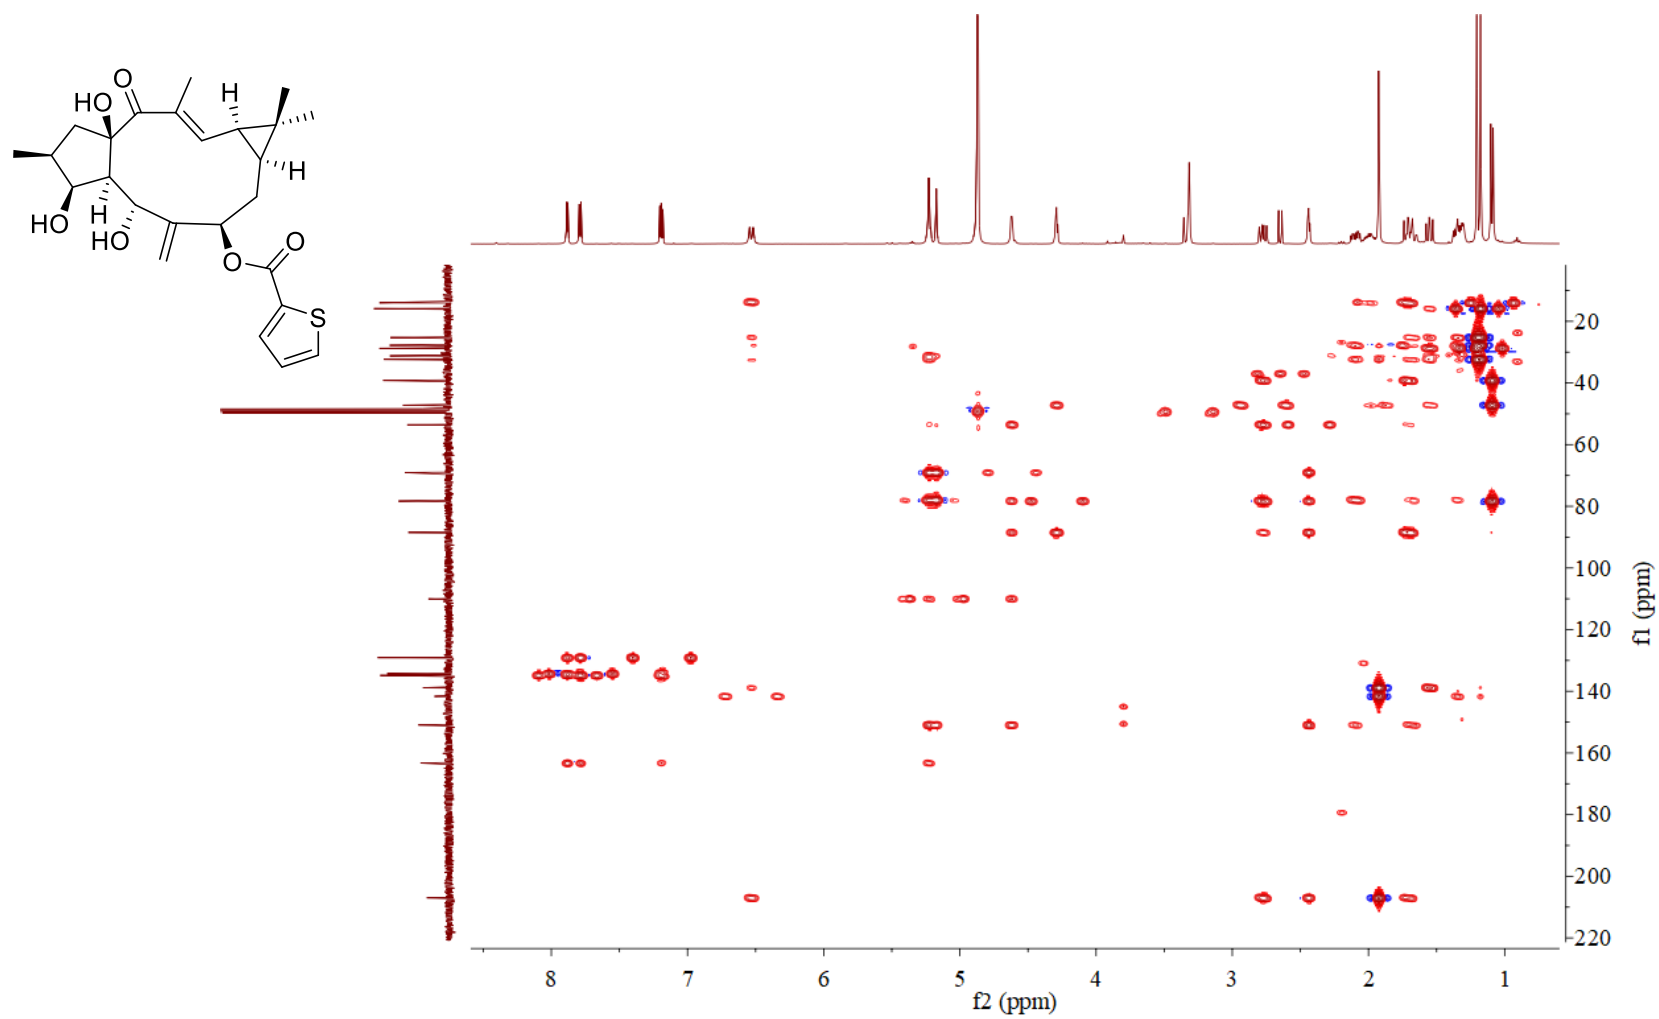

Figure S45.  $^1\text{H}$ - $^1\text{H}$  COSY spectra of **21** in  $\text{CDCl}_3$ .

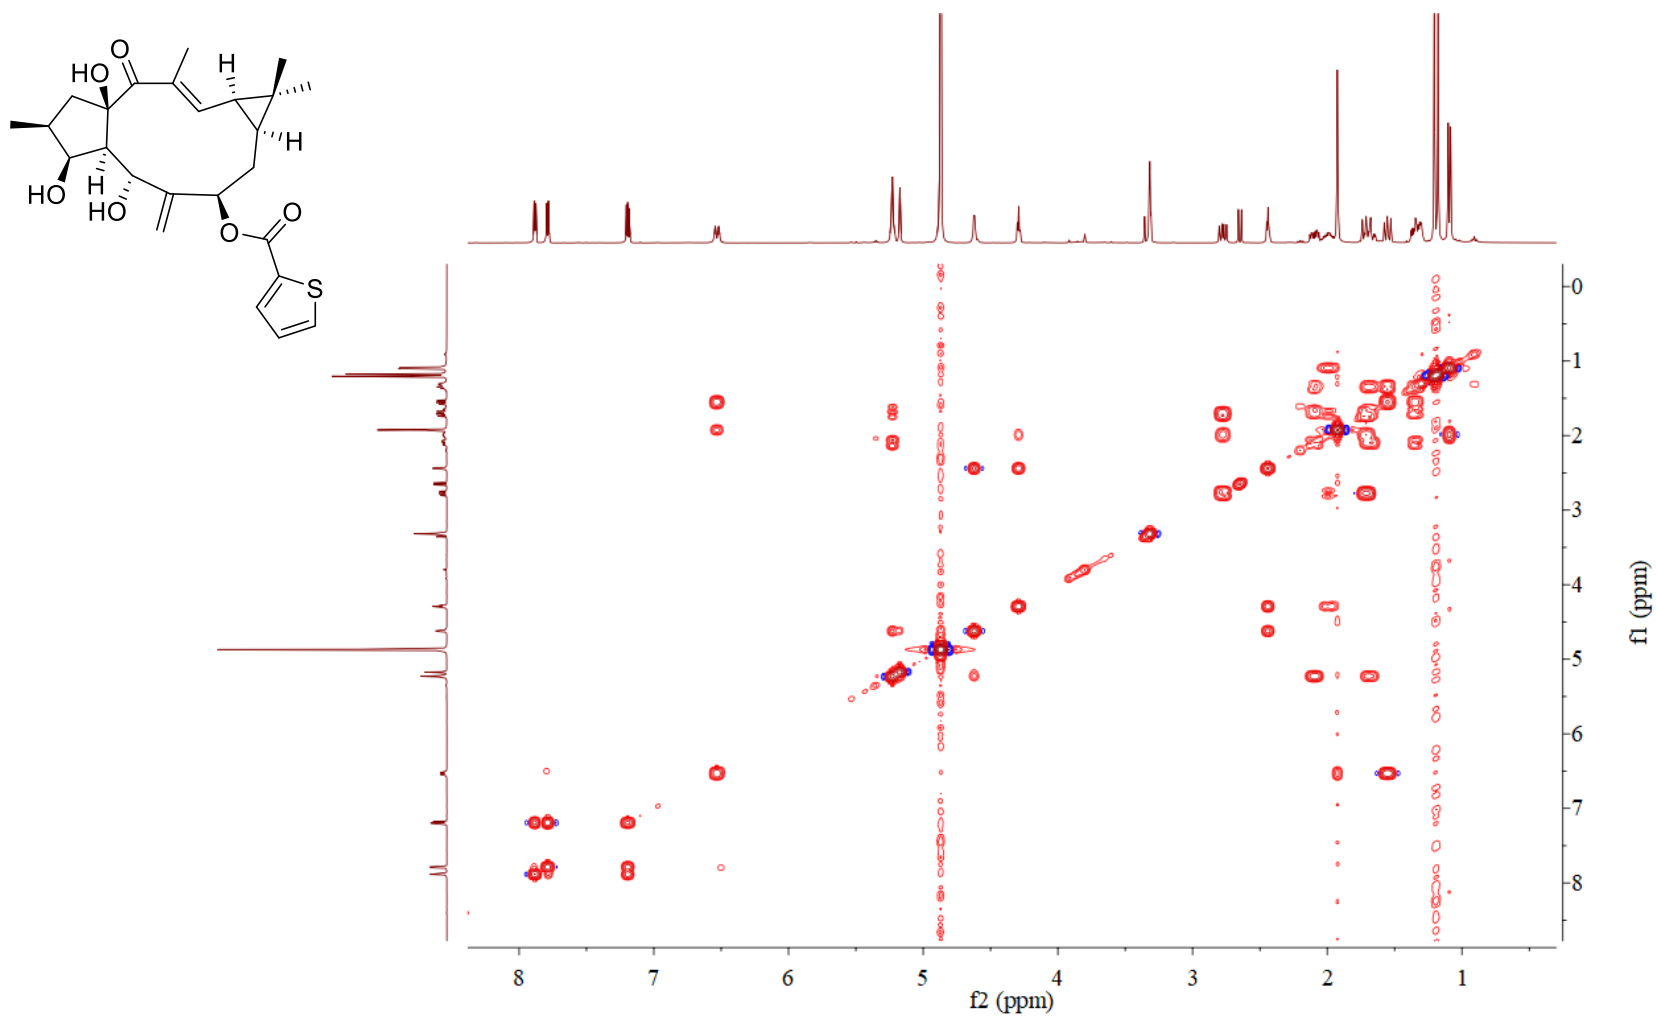

Figure S46.  $^1\text{H}$  NMR spectrum of **22** in  $\text{CDCl}_3$ .

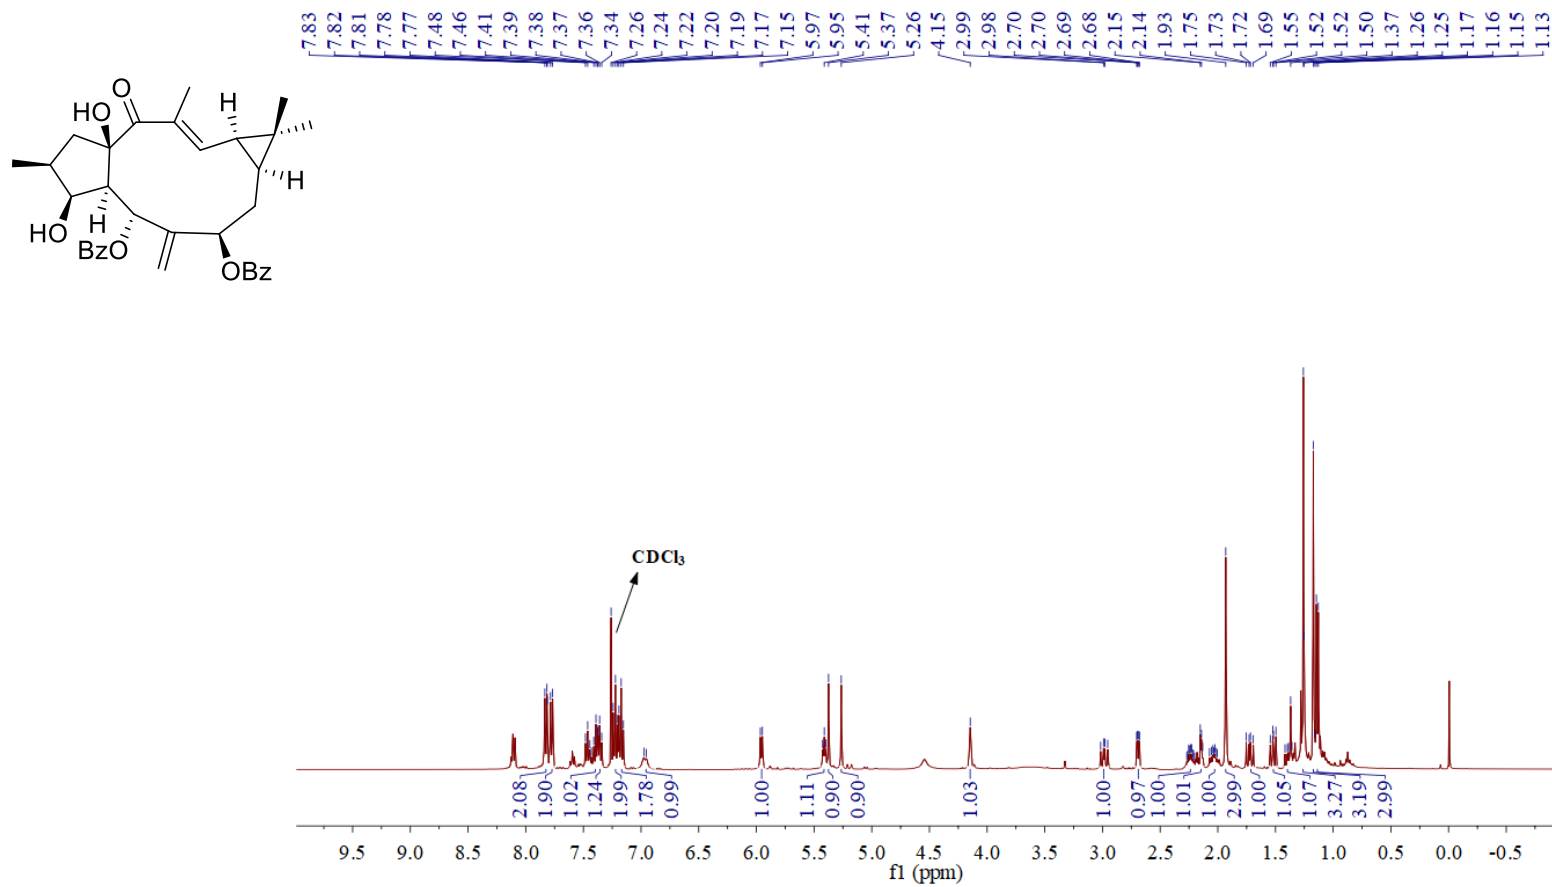



Figure S47.  $^{13}\text{C}$  NMR and DEPT 135 spectra of **22** in  $\text{CDCl}_3$ .

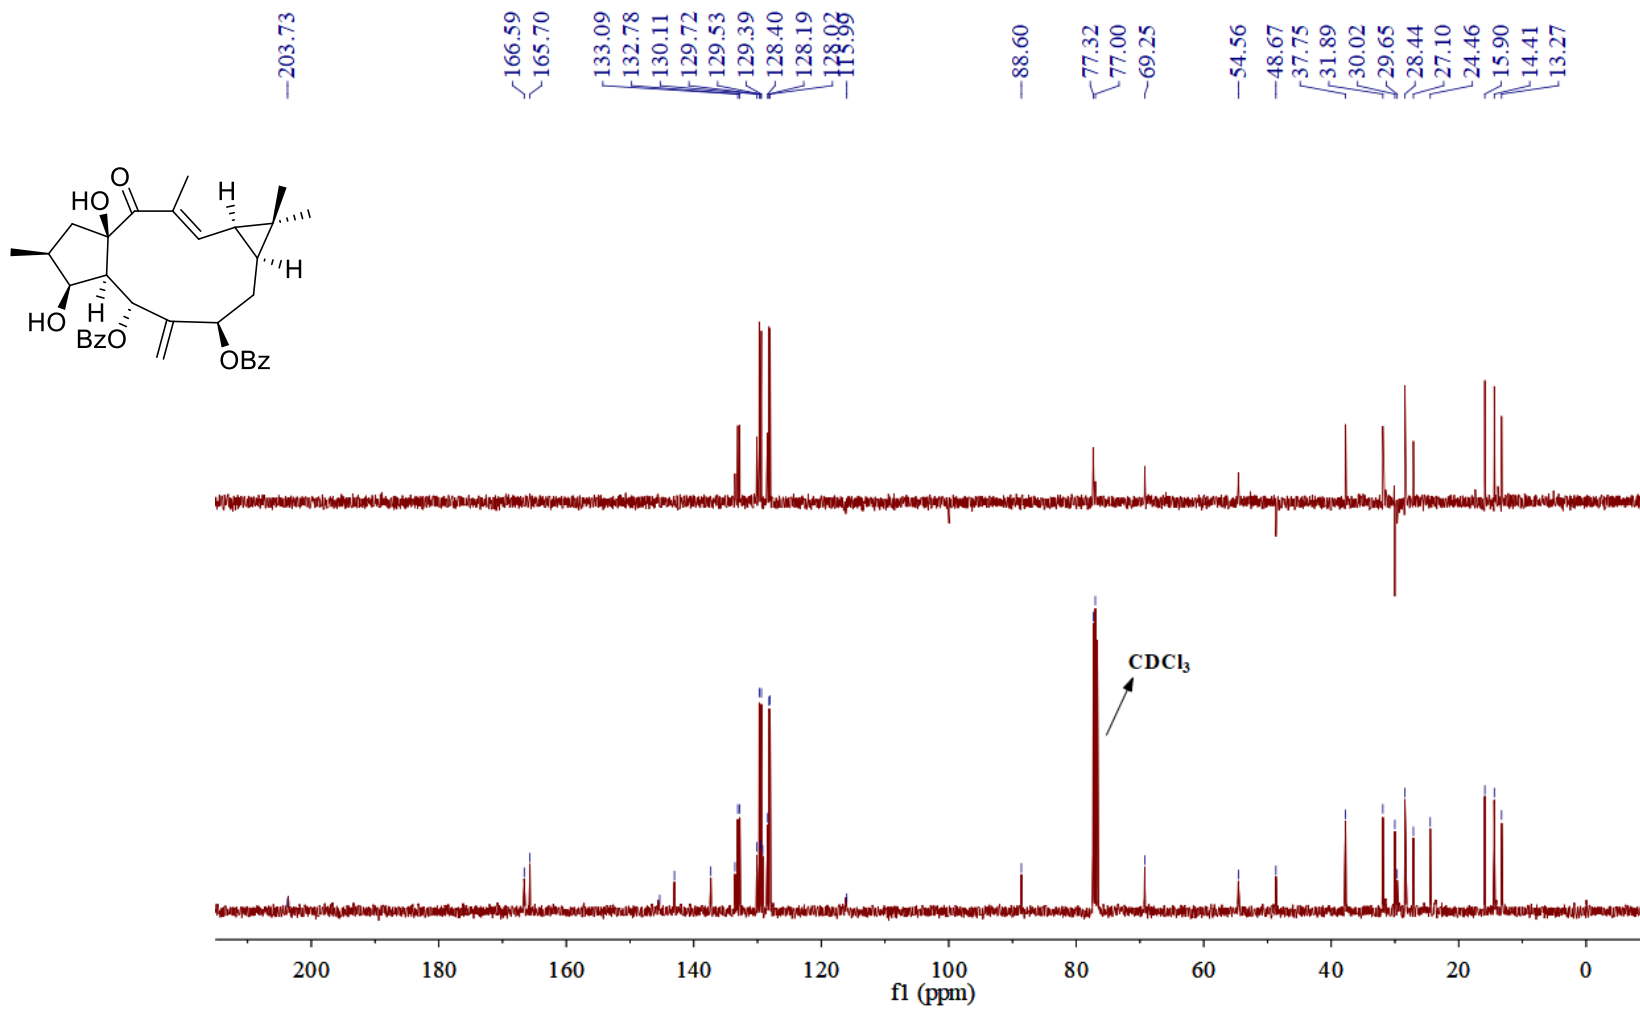

Figure S48. HSQC spectrum of **22** in CDCl<sub>3</sub>.

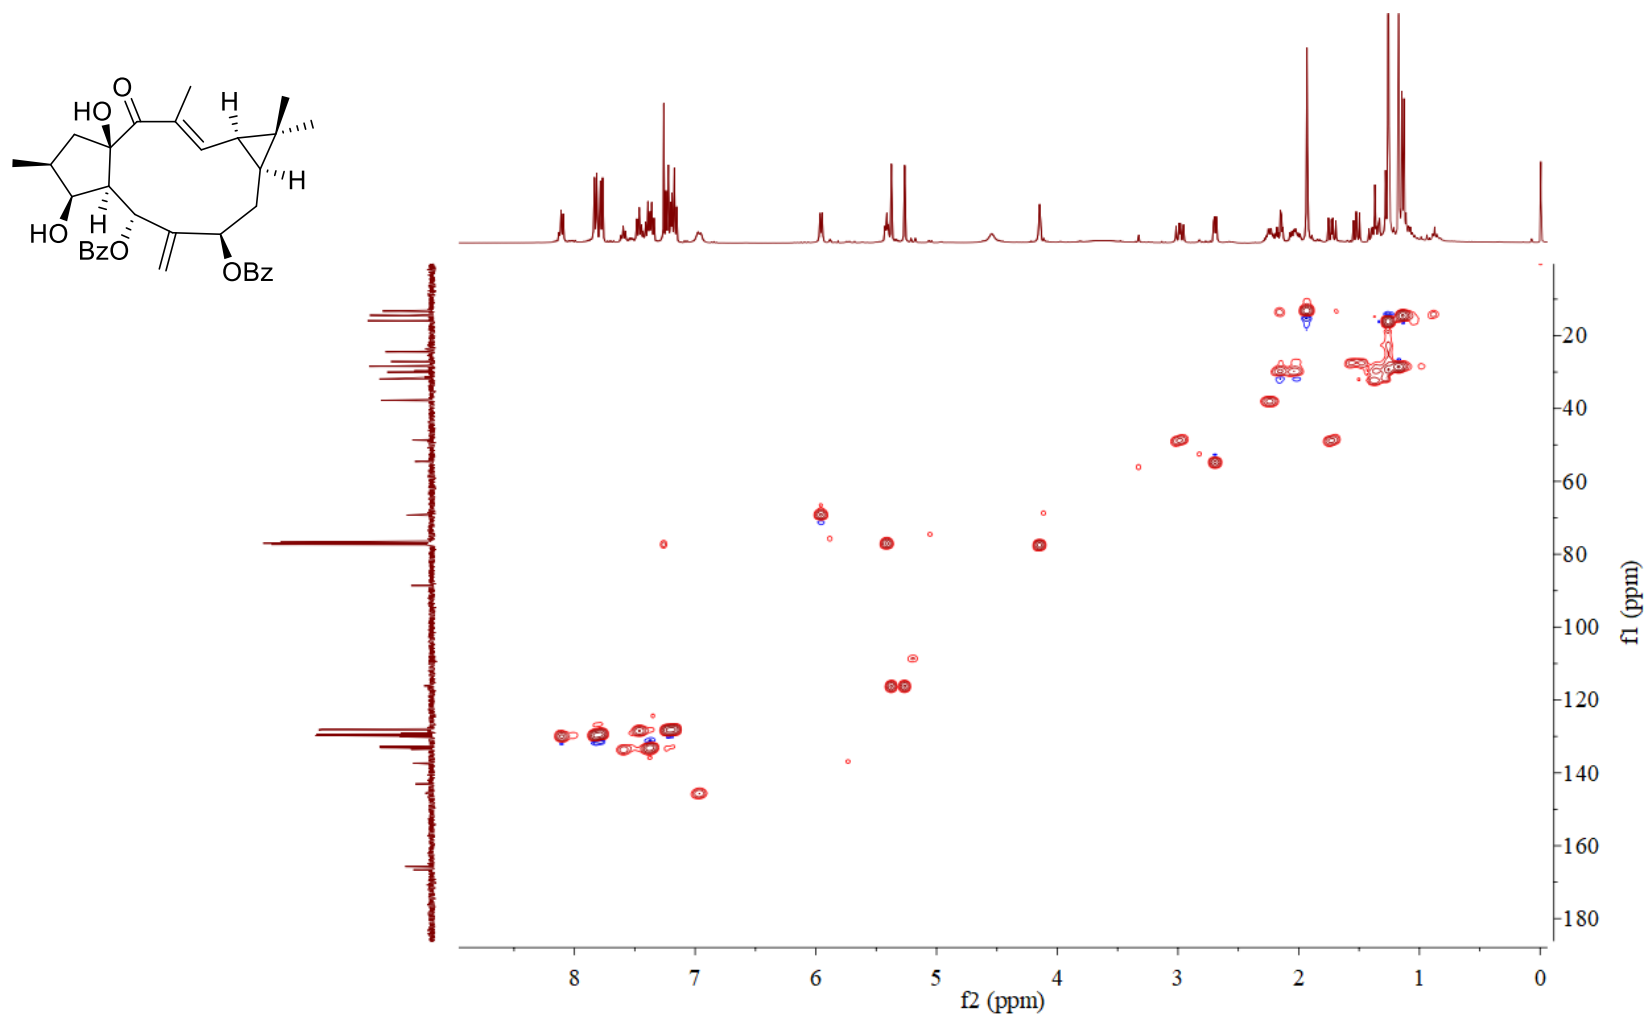

Figure S49. HMBC spectrum of **22** in CDCl<sub>3</sub>.

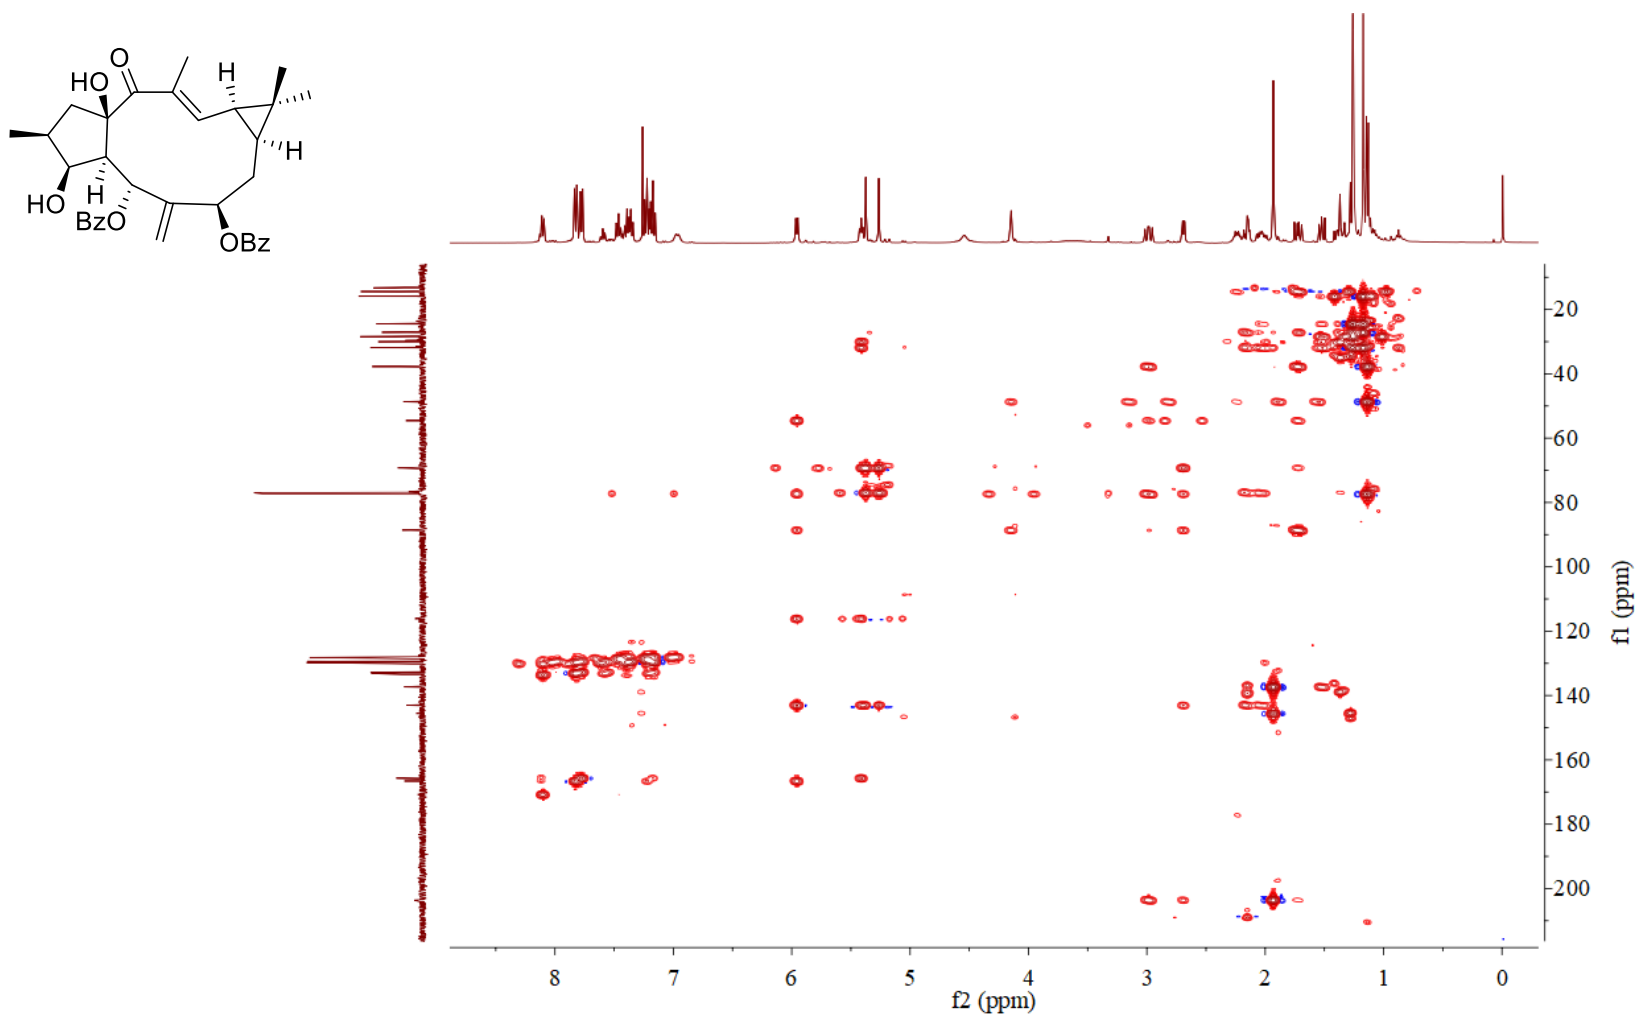

Figure S50.  $^1\text{H}$ - $^1\text{H}$  COSY spectrum of **22** in  $\text{CDCl}_3$ .

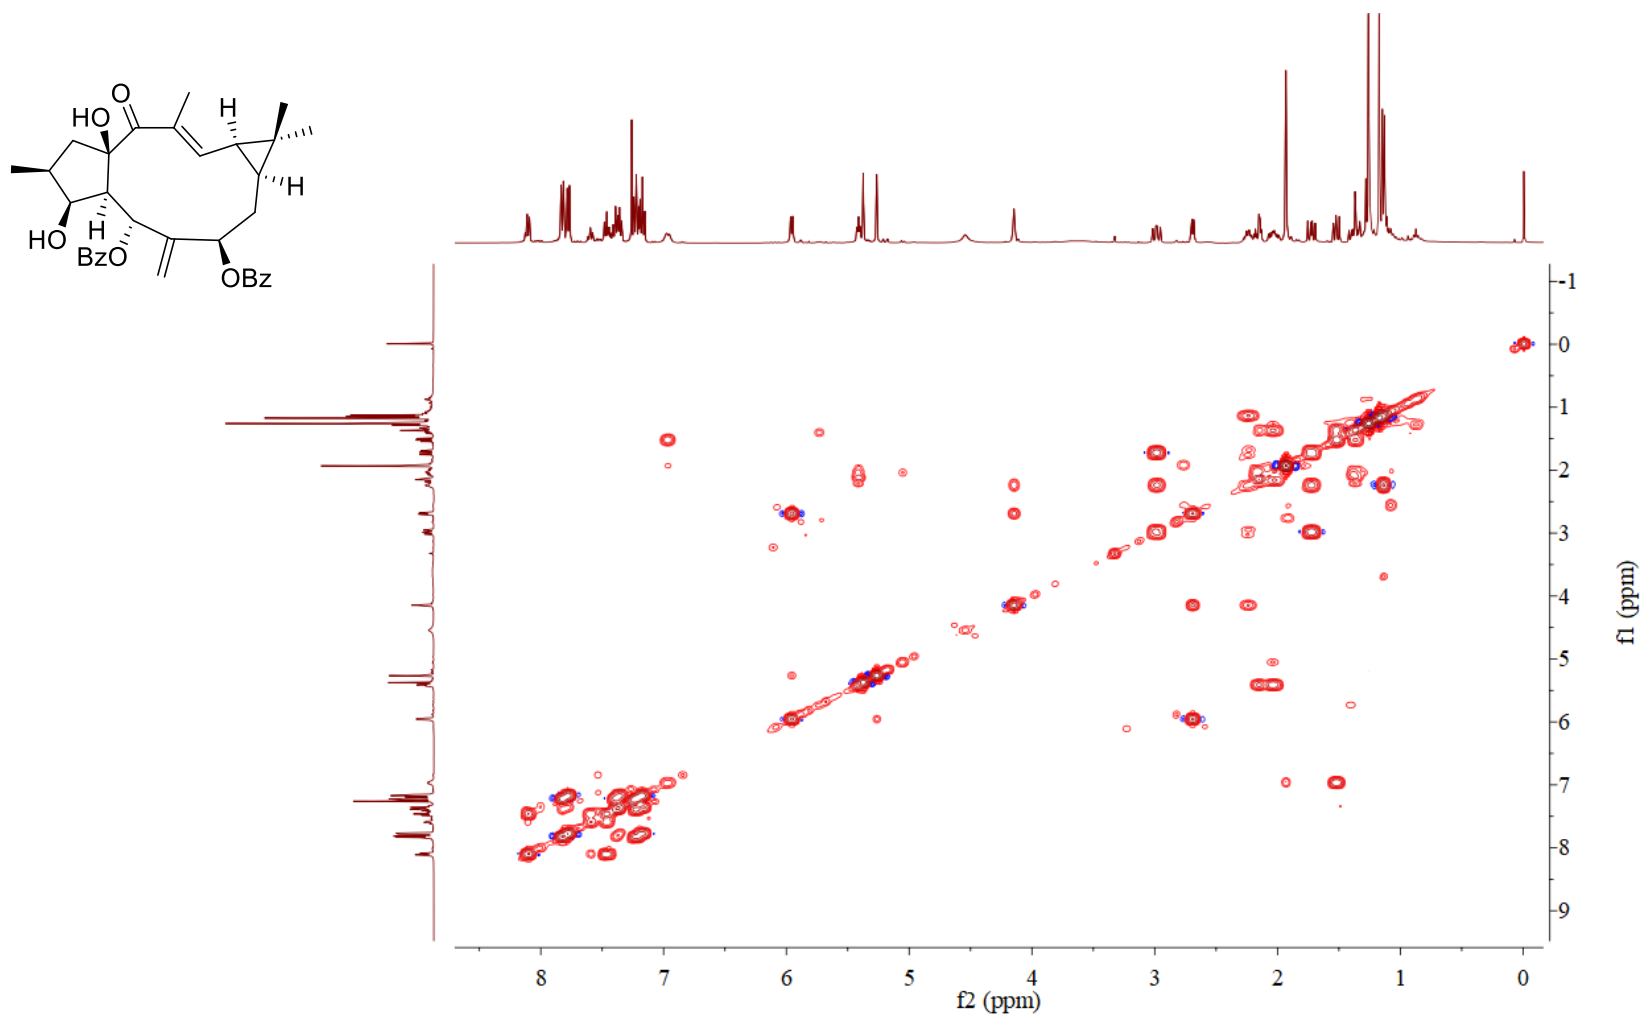

Figure S51.  $^1\text{H}$  NMR spectrum of **23** in  $\text{CDCl}_3$ .

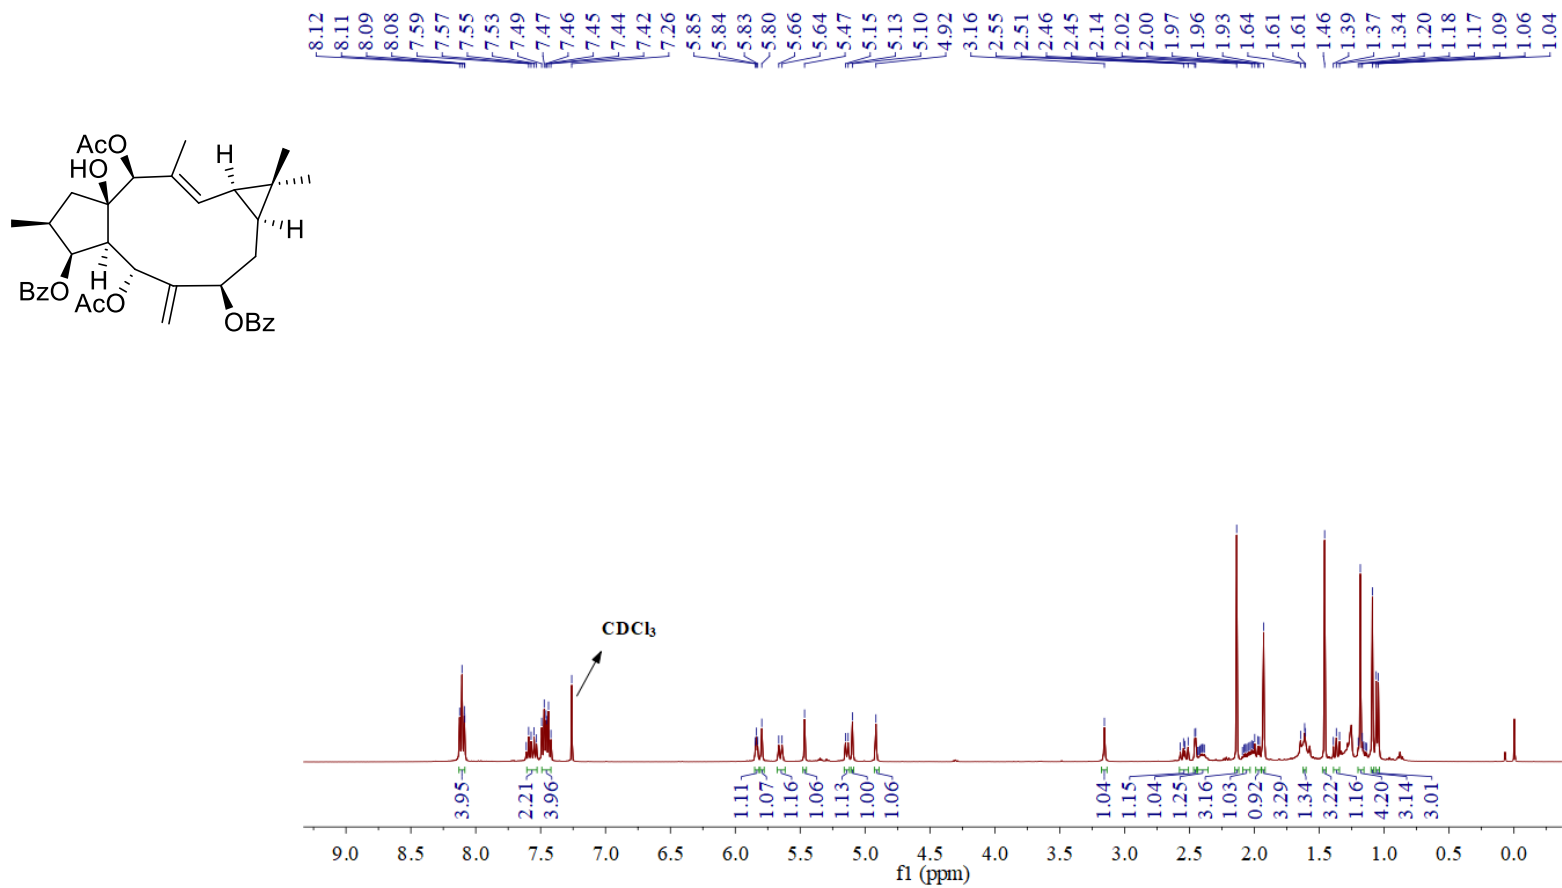

Figure S52.  $^{13}\text{C}$  NMR and DEPT 135 spectra of **23** in  $\text{CDCl}_3$ .

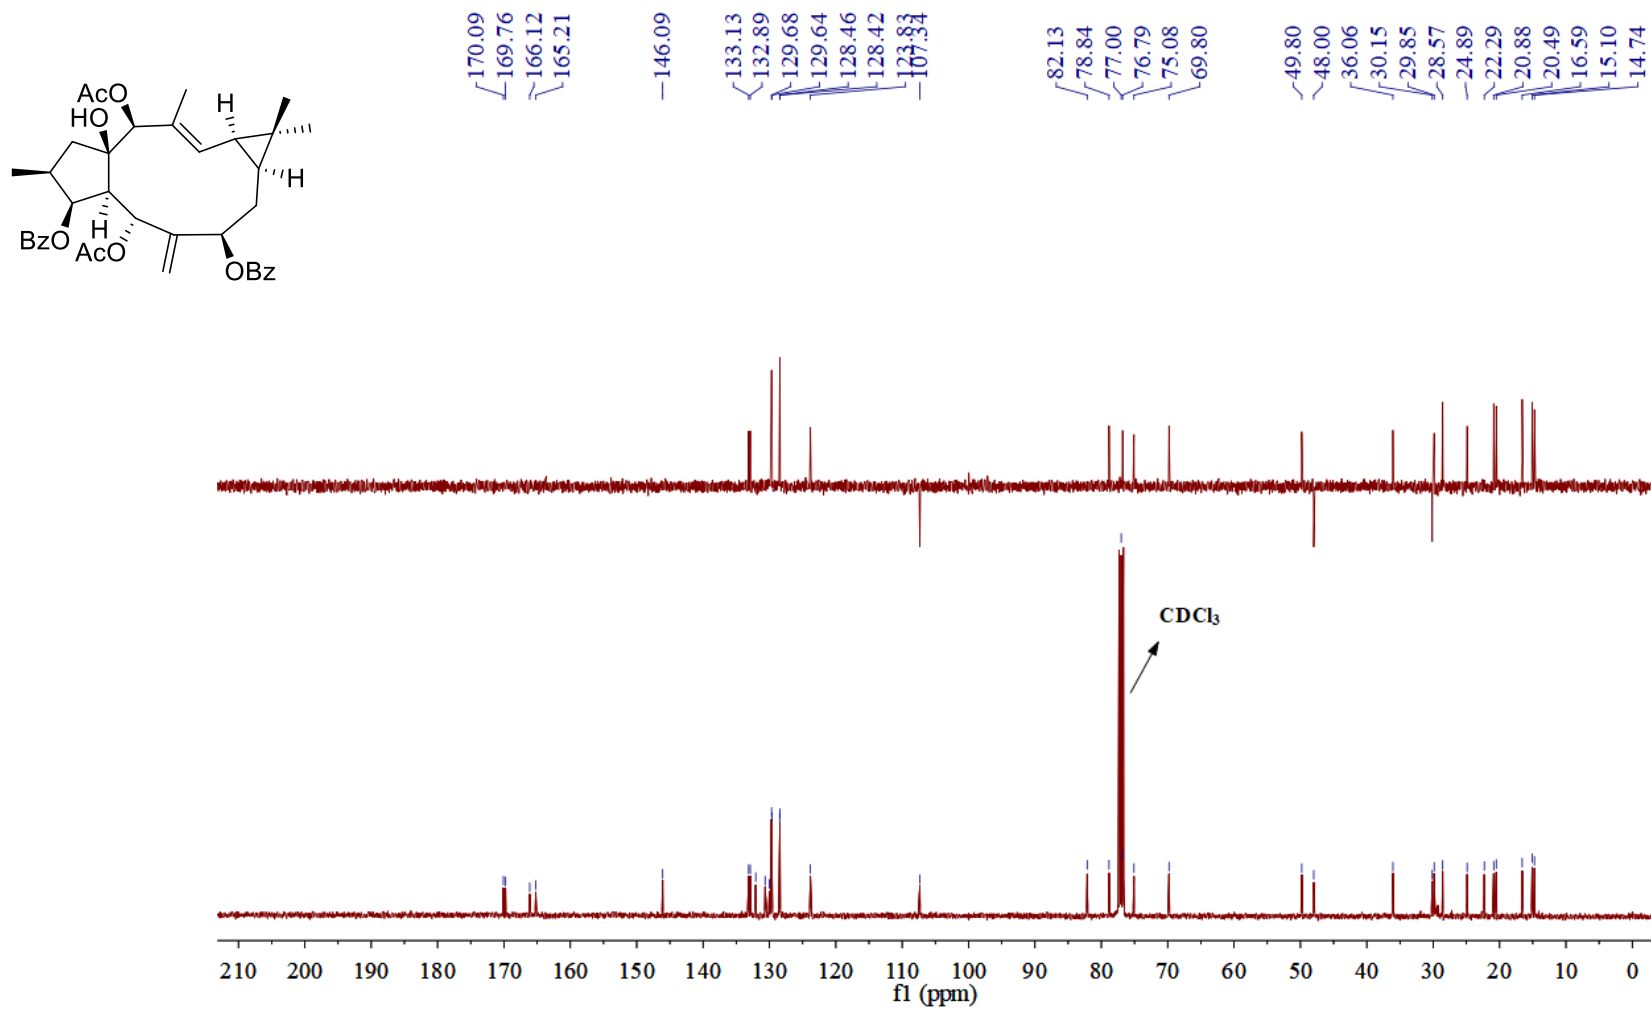

Figure S53. HSQC spectrum of **23** in CDCl<sub>3</sub>.

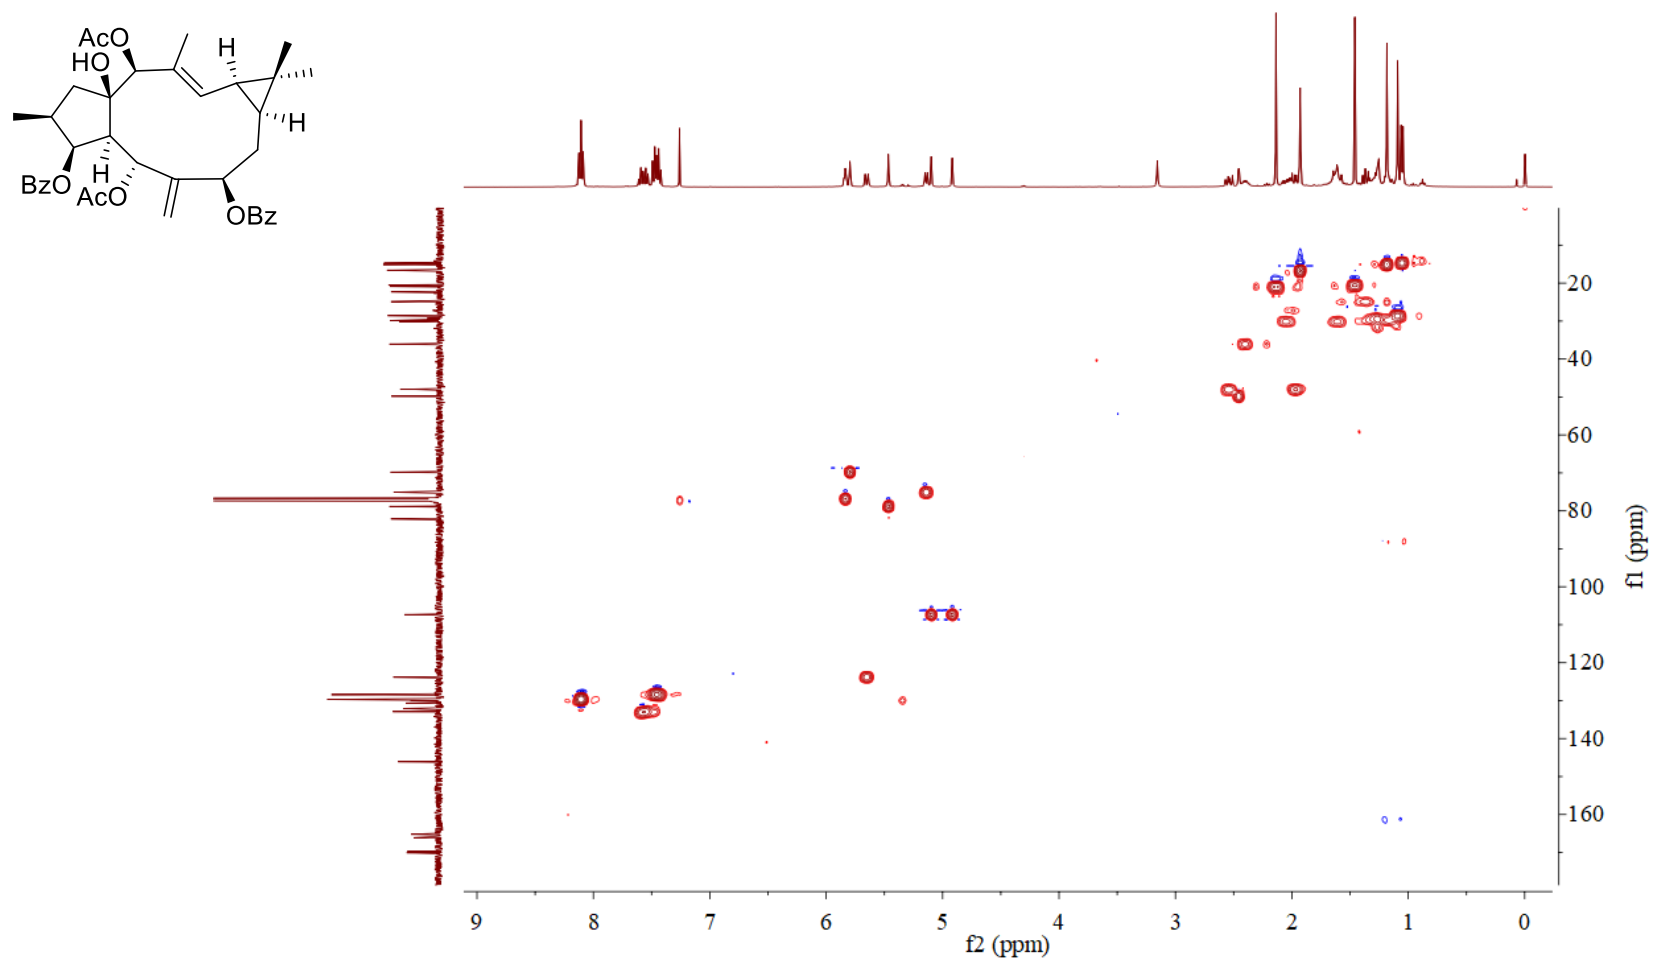

Figure S54. HMBC spectrum of **23** in CDCl<sub>3</sub>.

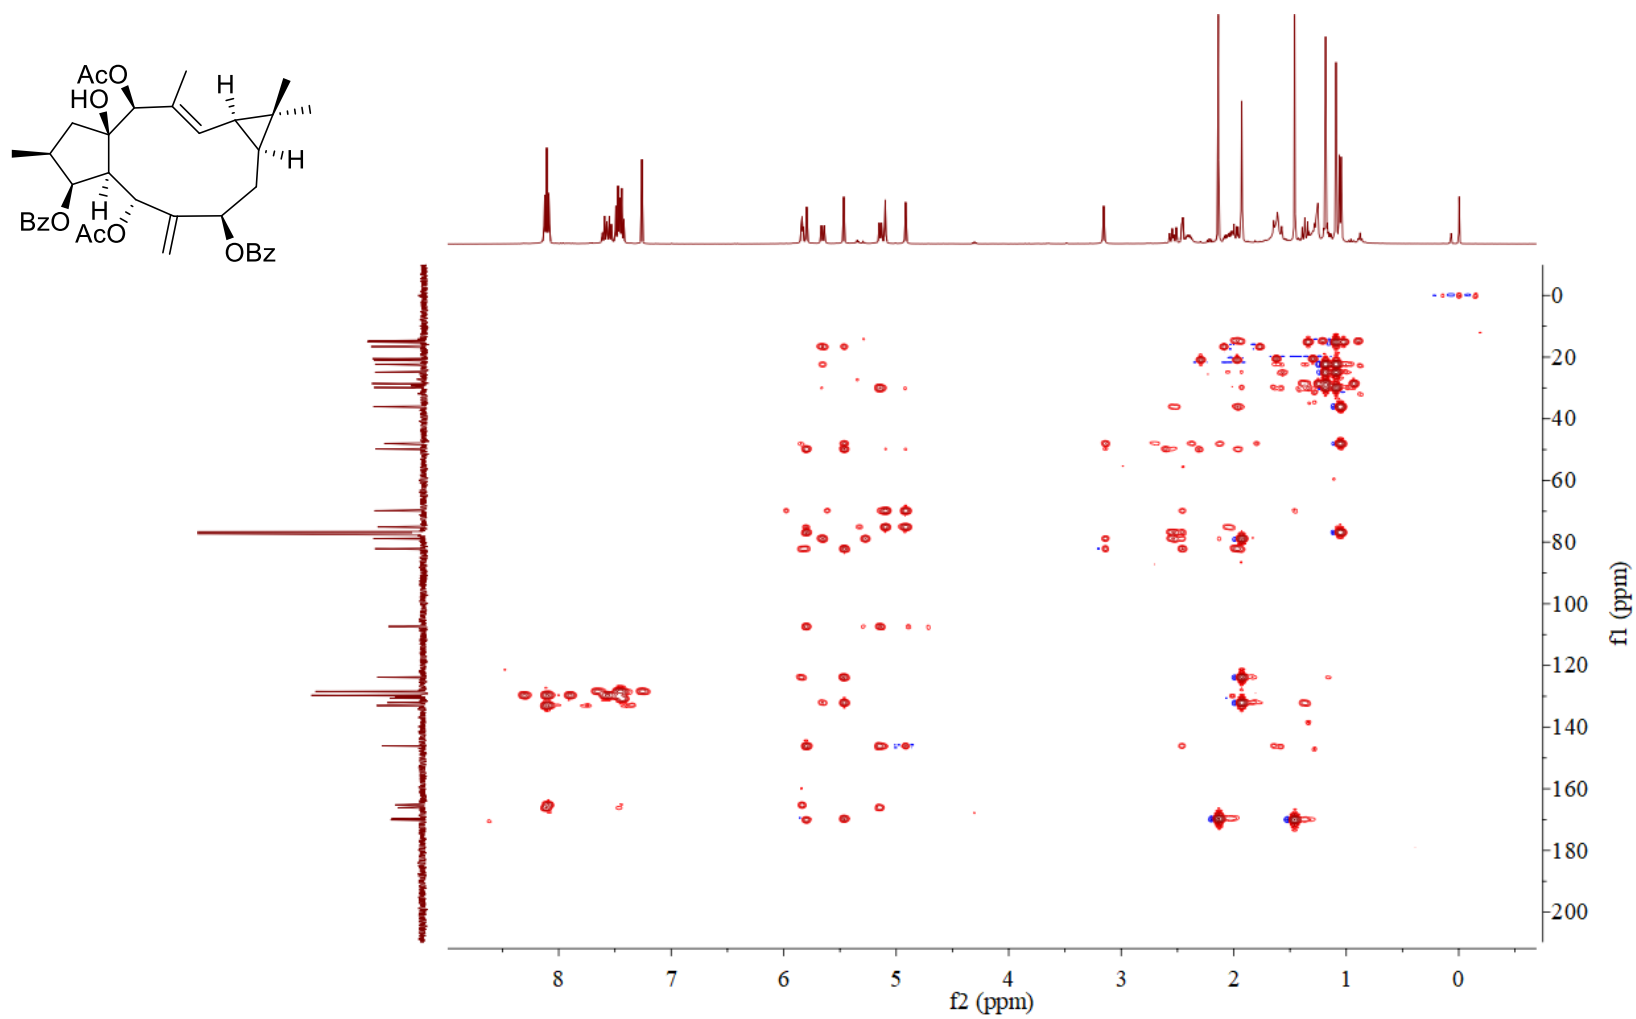



Figure S55.  $^1\text{H}$ - $^1\text{H}$  COSY spectrum of **23** in  $\text{CDCl}_3$ .

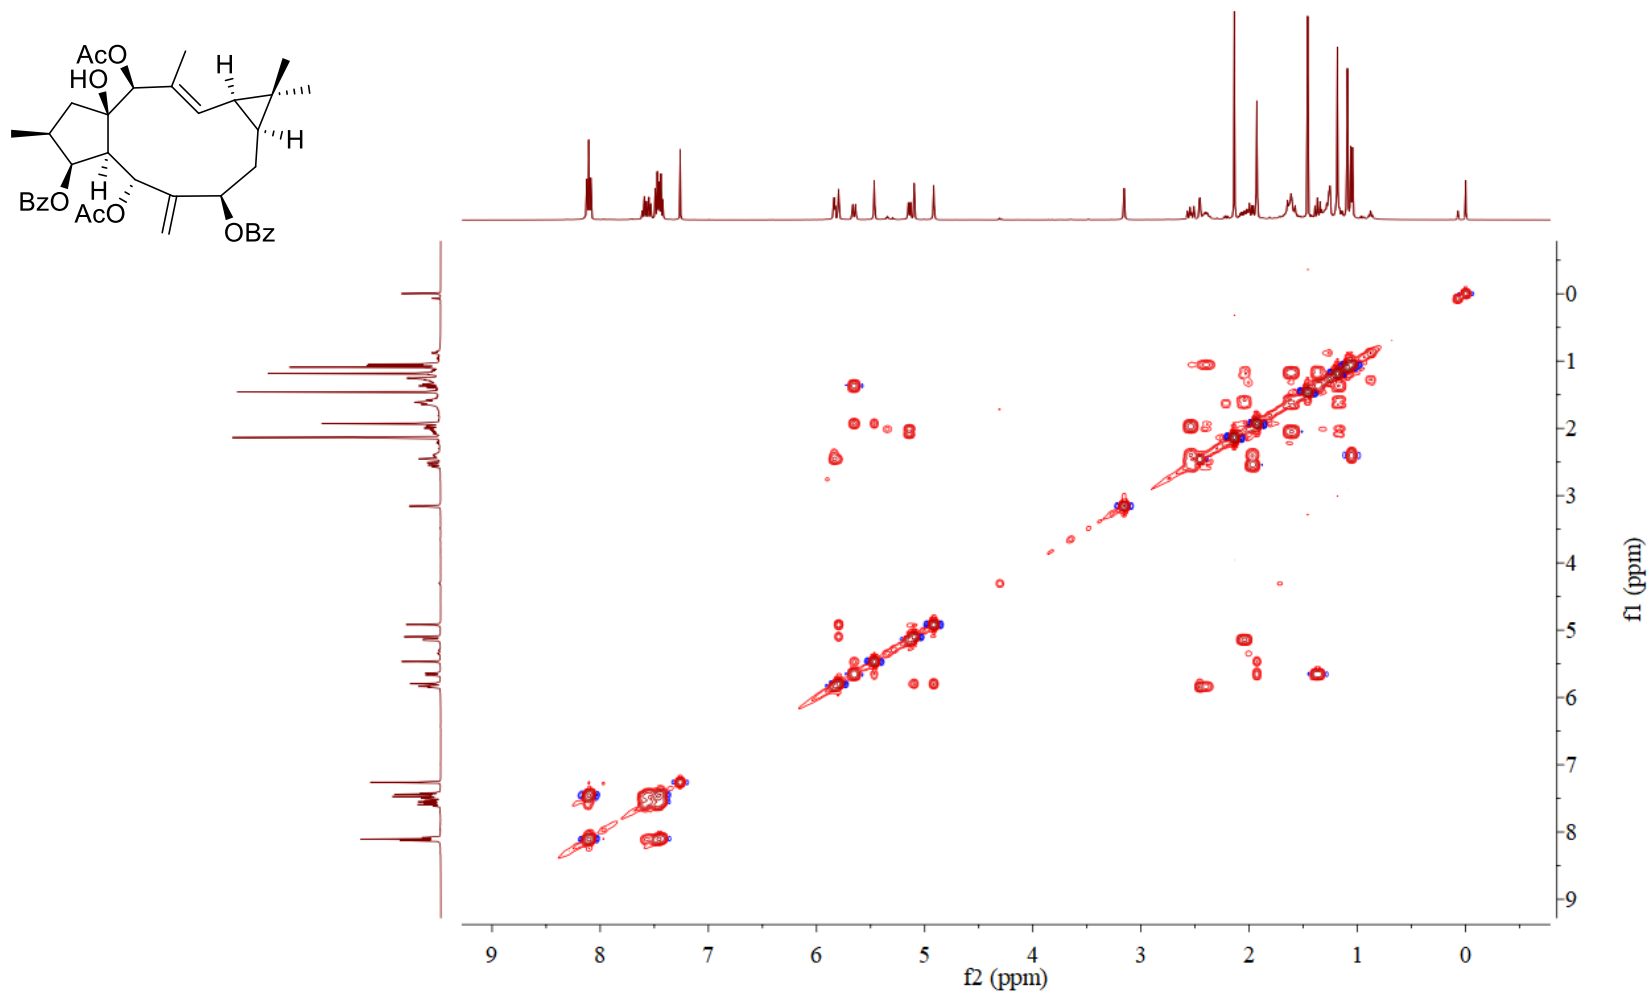

S81

Figure S56. NOESY spectrum of **23** in CDCl<sub>3</sub>.

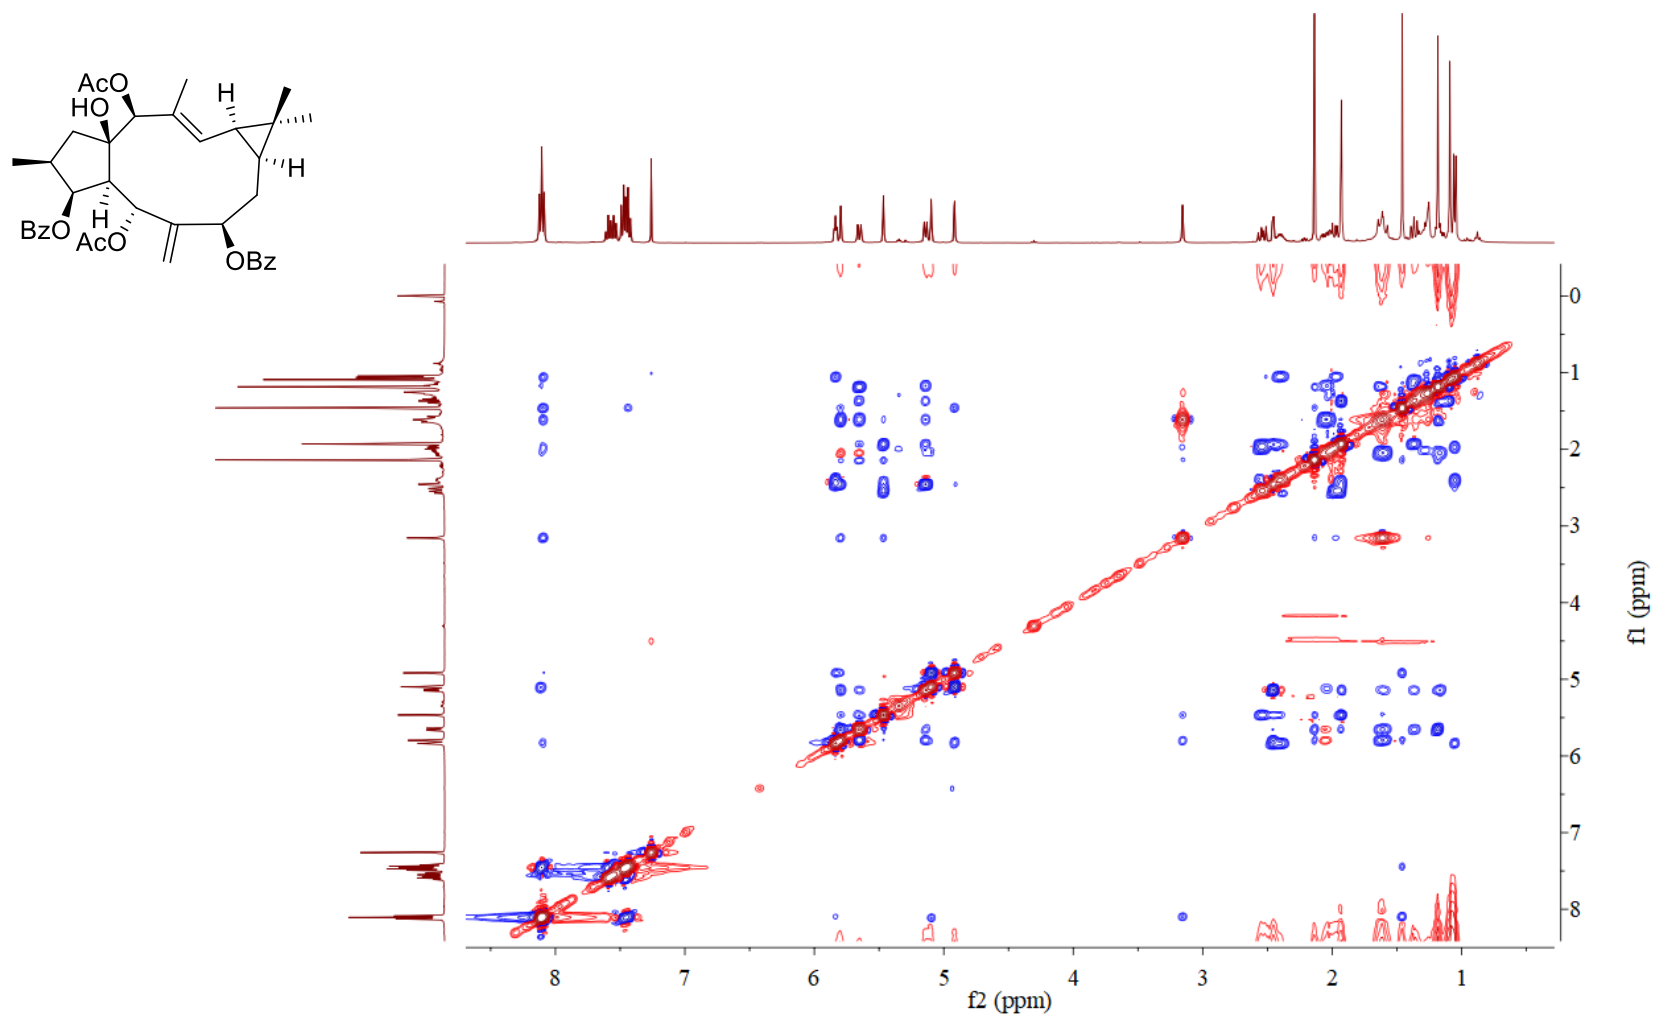

Figure S57. <sup>1</sup>H NMR spectrum of **24** in CDCl<sub>3</sub>.

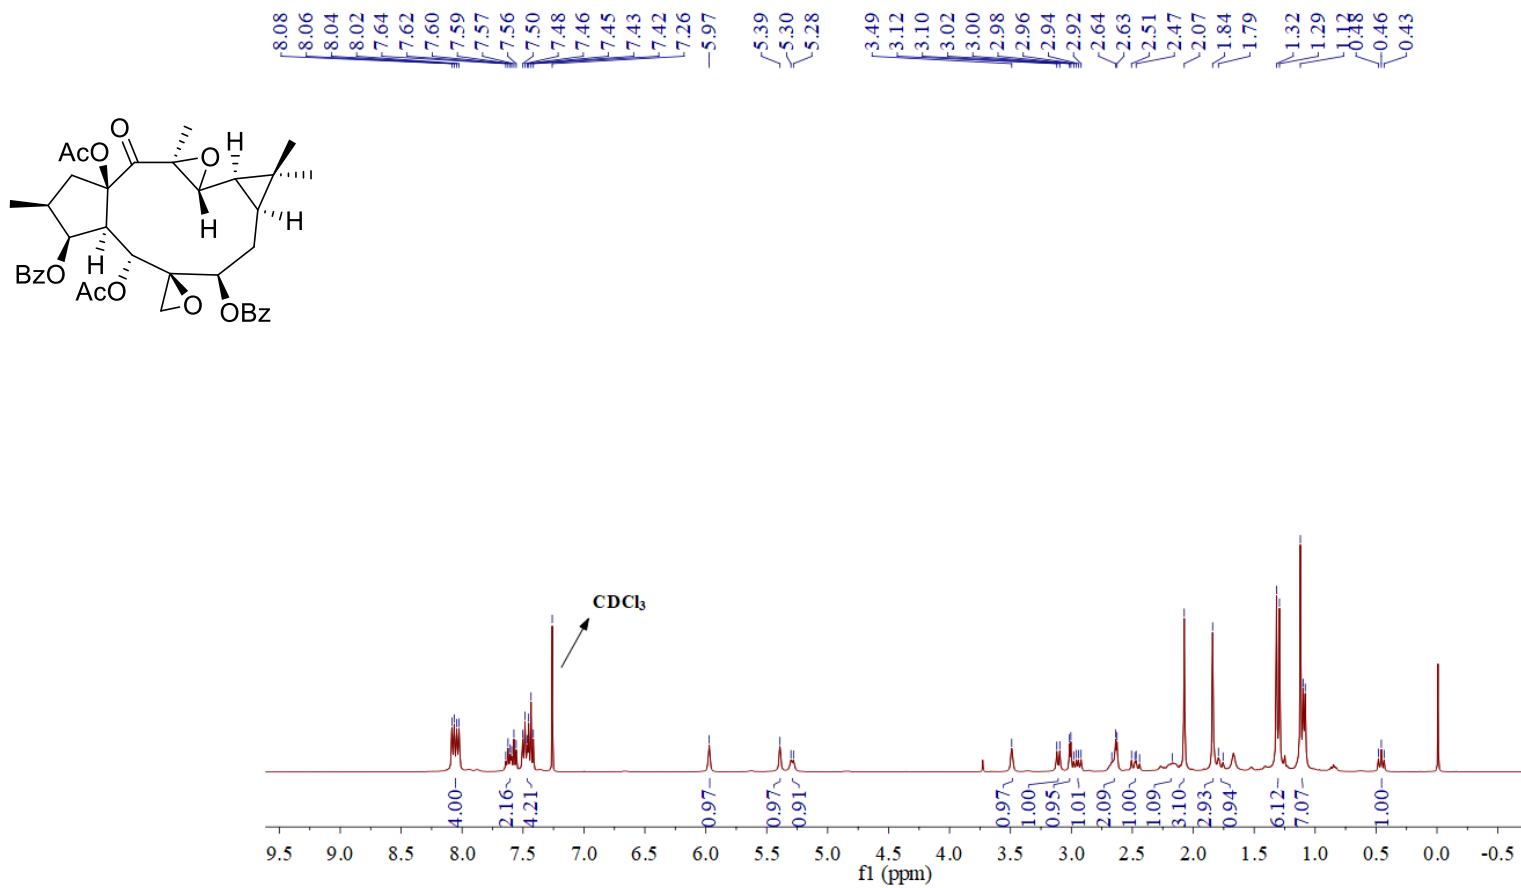

Figure S58.  $^{13}\text{C}$  NMR and DEPT 135 spectra of **24** in  $\text{CDCl}_3$ .

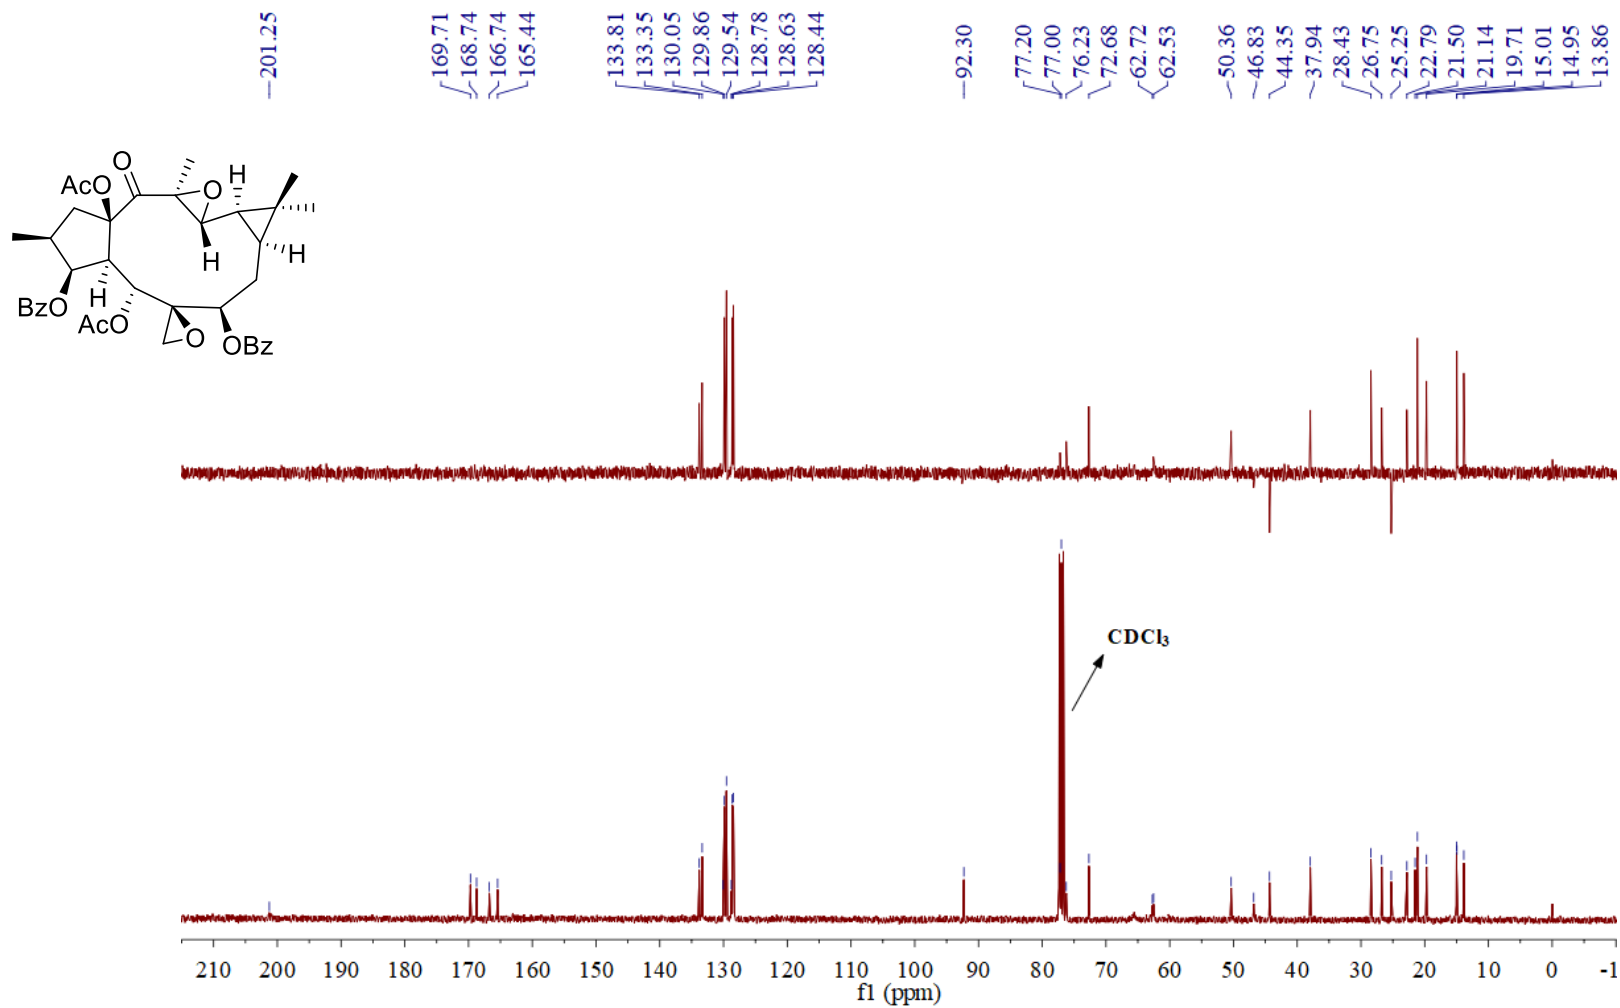

Figure S59. HSQC spectrum of **24** in CDCl<sub>3</sub>.

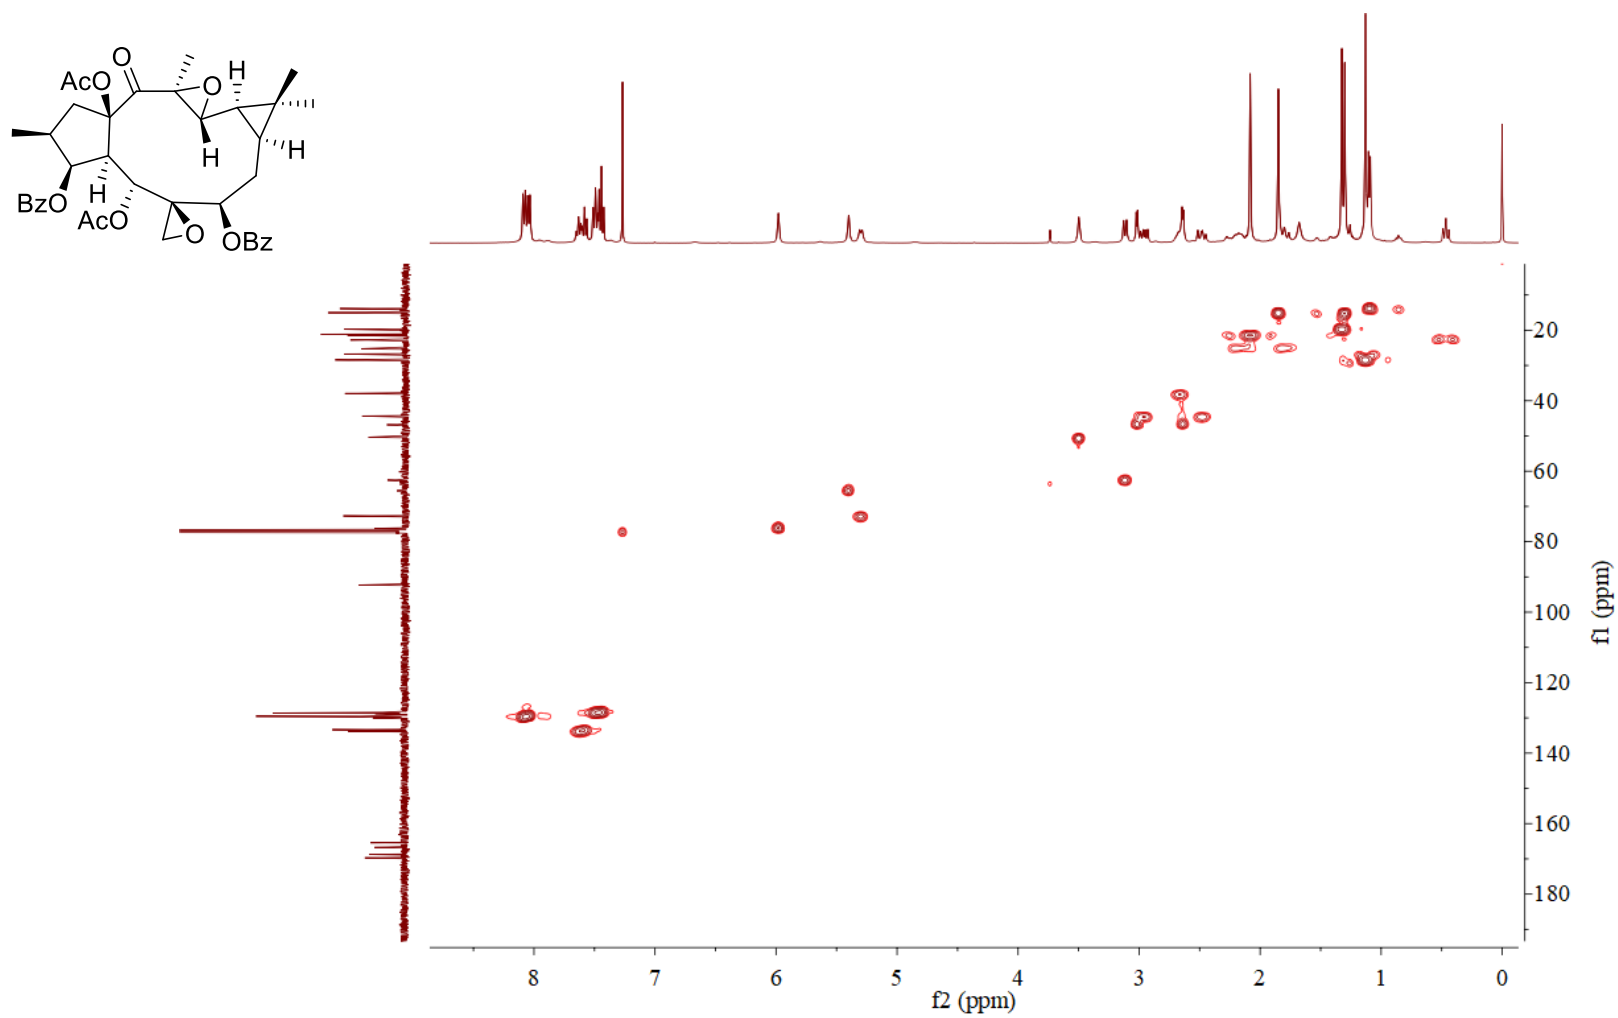

Figure S60. HMBC spectrum of **24** in CDCl<sub>3</sub>.

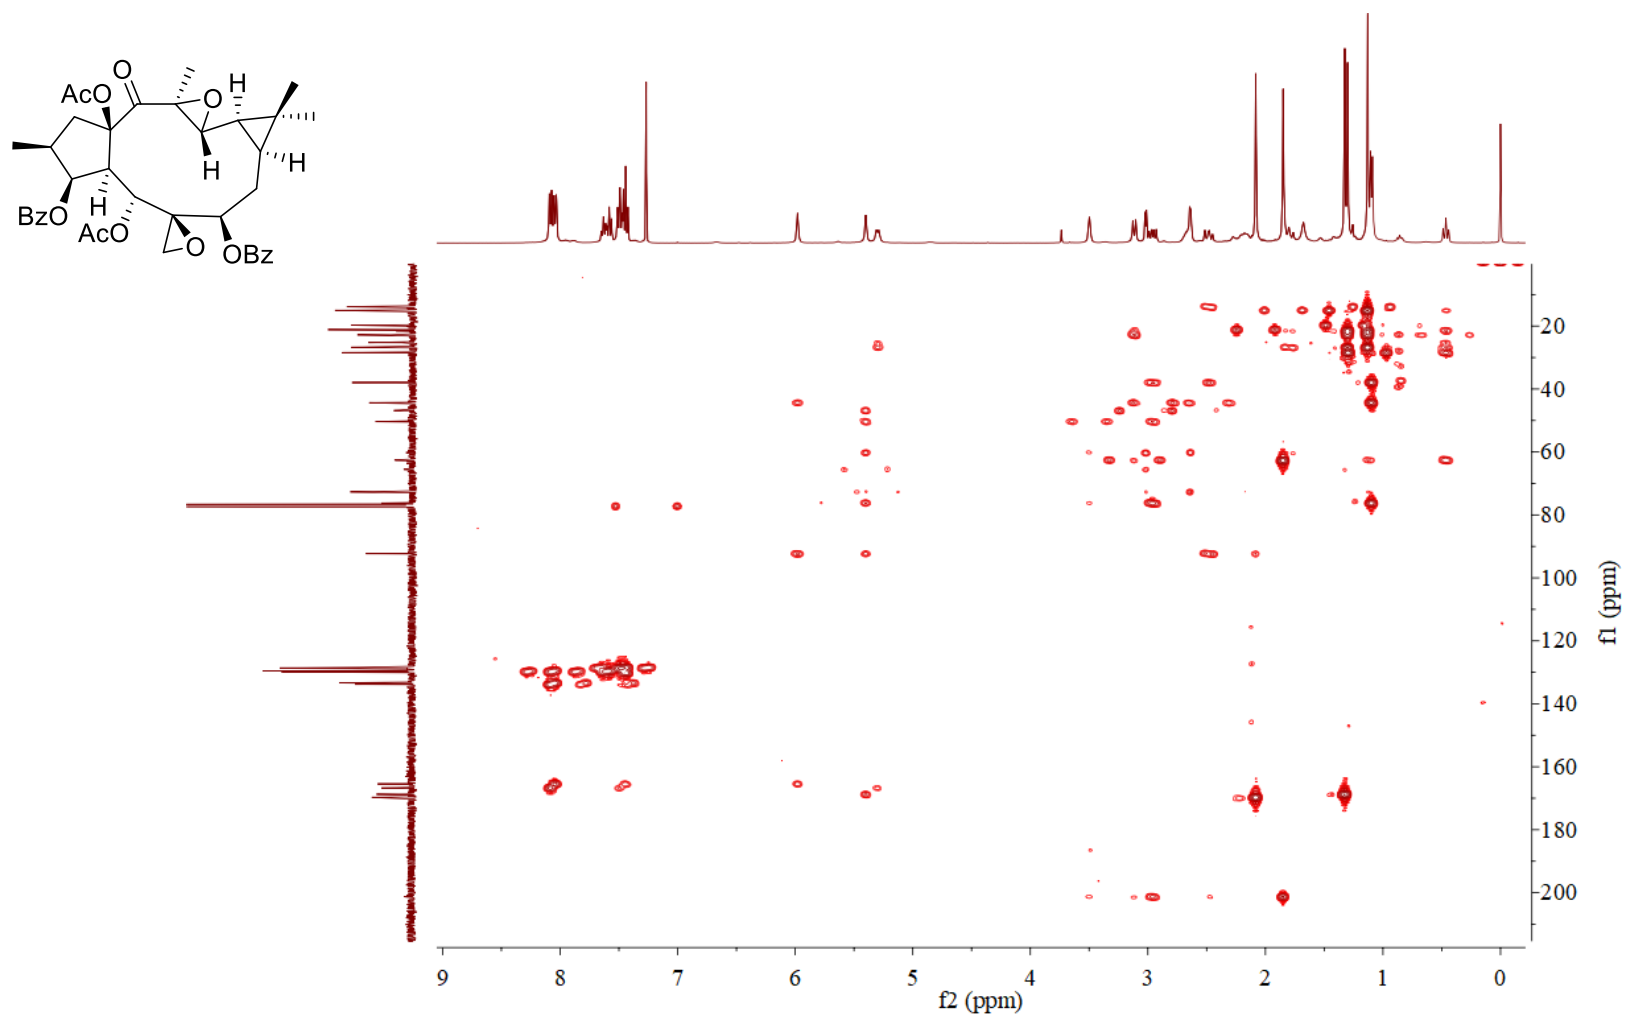

Figure S61.  $^1\text{H}$ - $^1\text{H}$  COSY spectrum of **24** in  $\text{CDCl}_3$ .

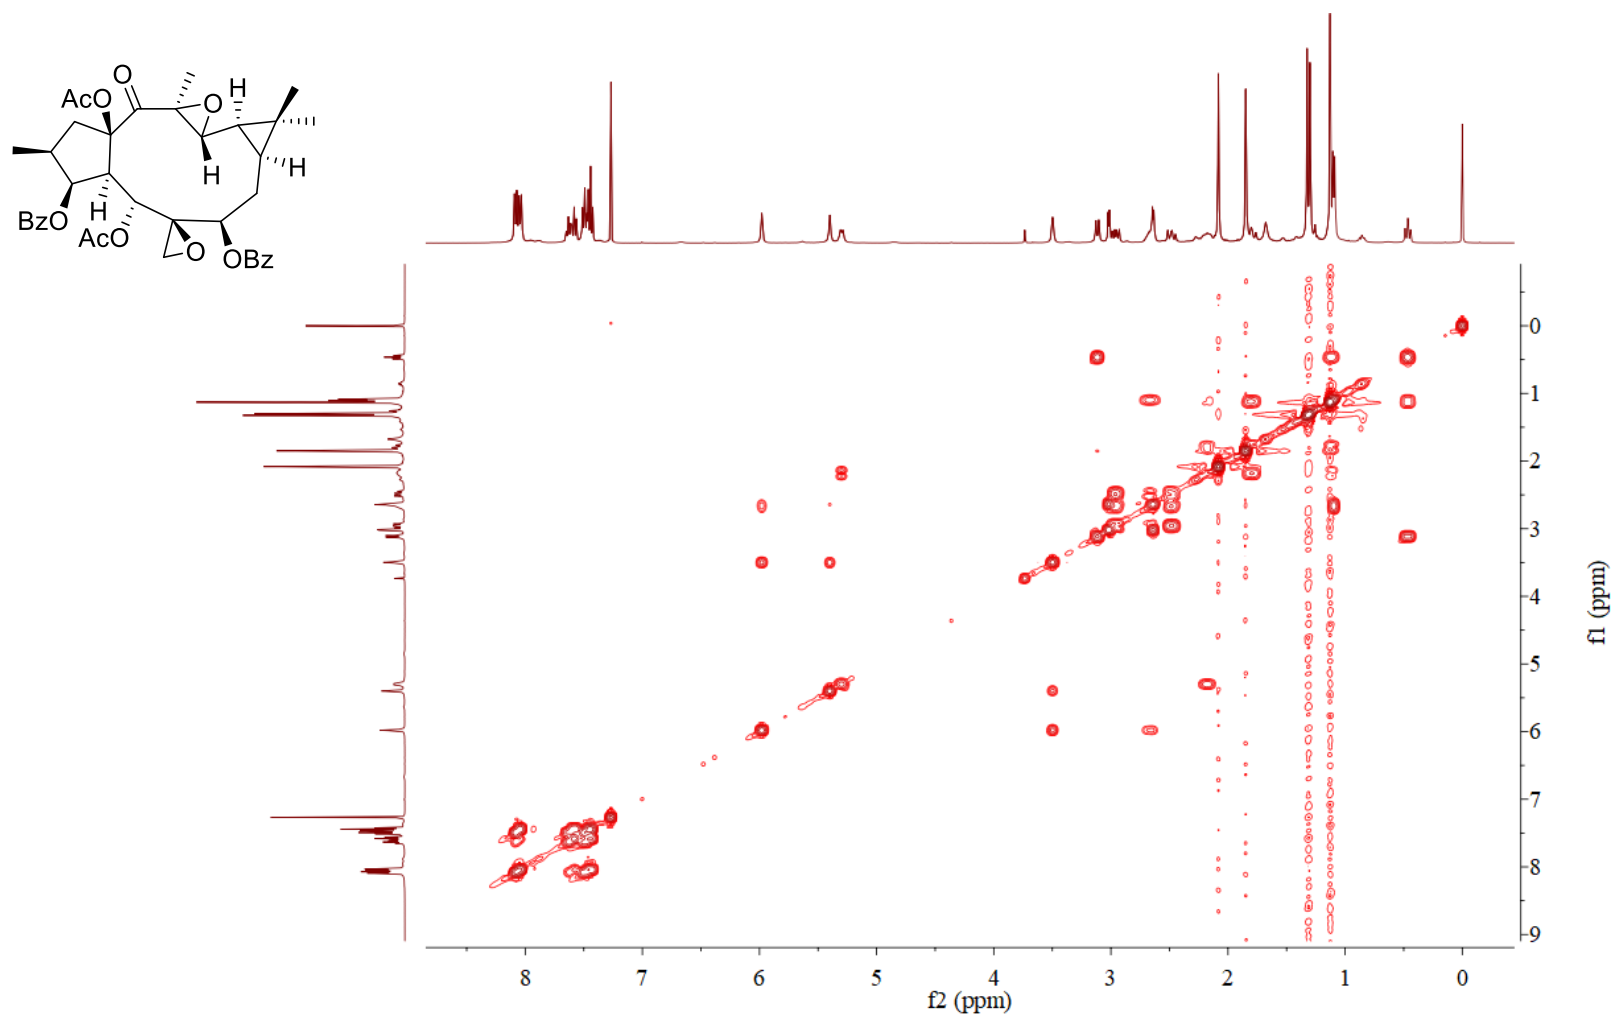

Figure S62. NOESY spectrum of **24** in CDCl<sub>3</sub>.

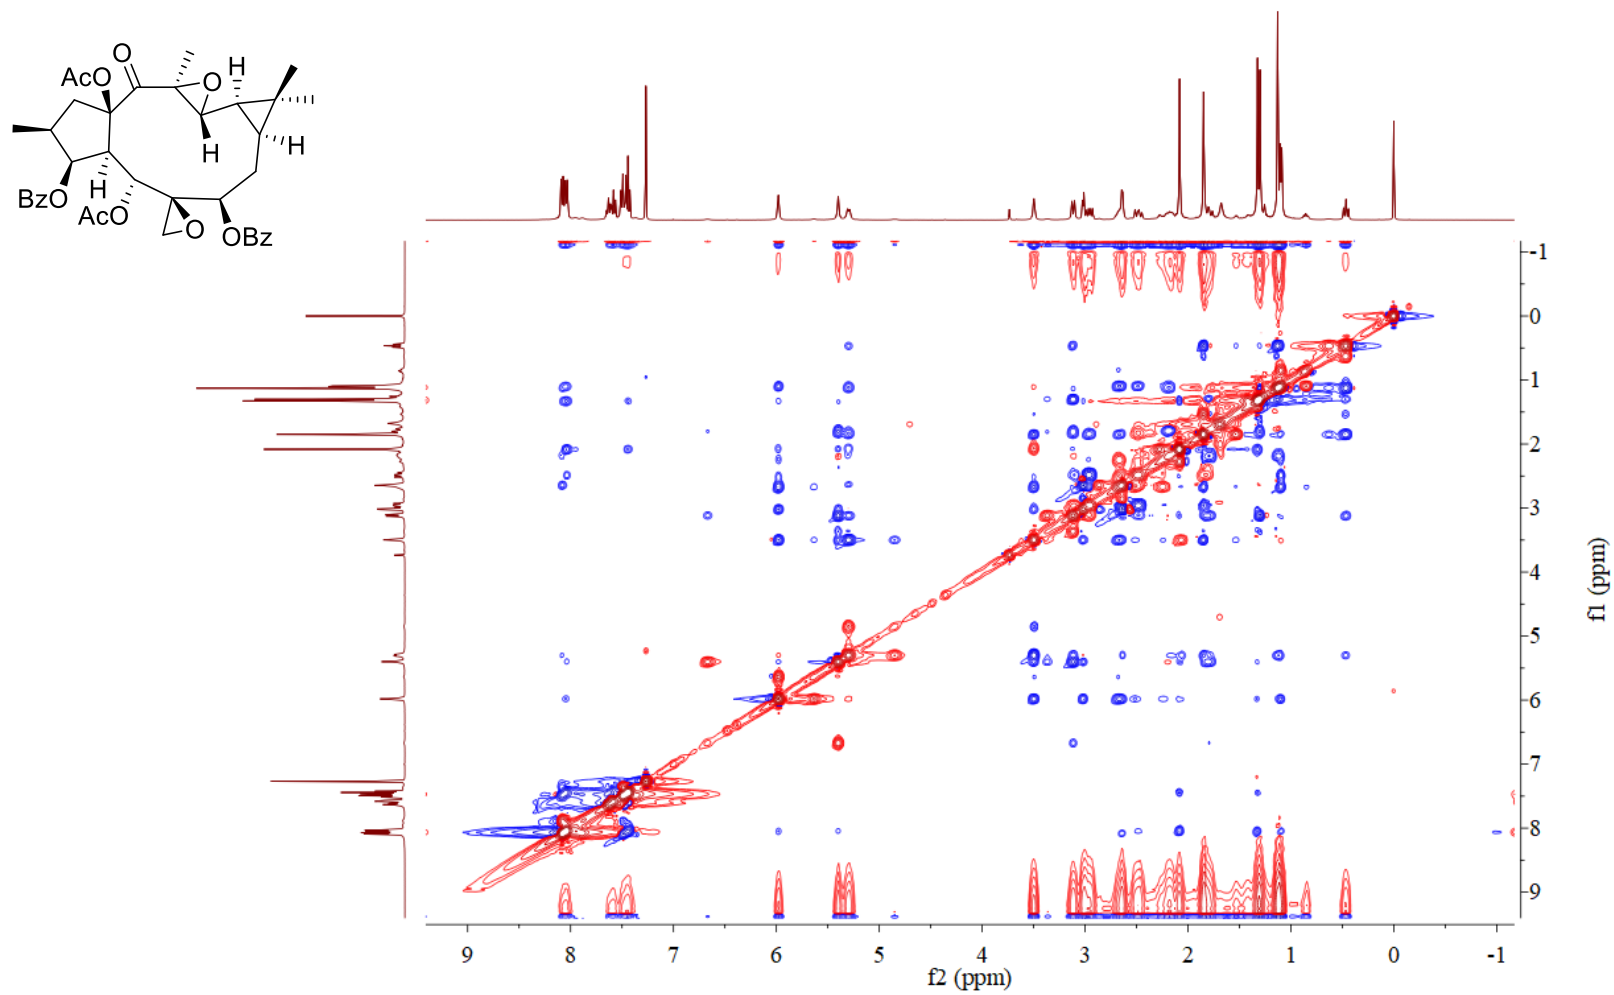



Figure S63.  $^1\text{H}$  NMR spectrum of **25** in  $\text{CDCl}_3$ .

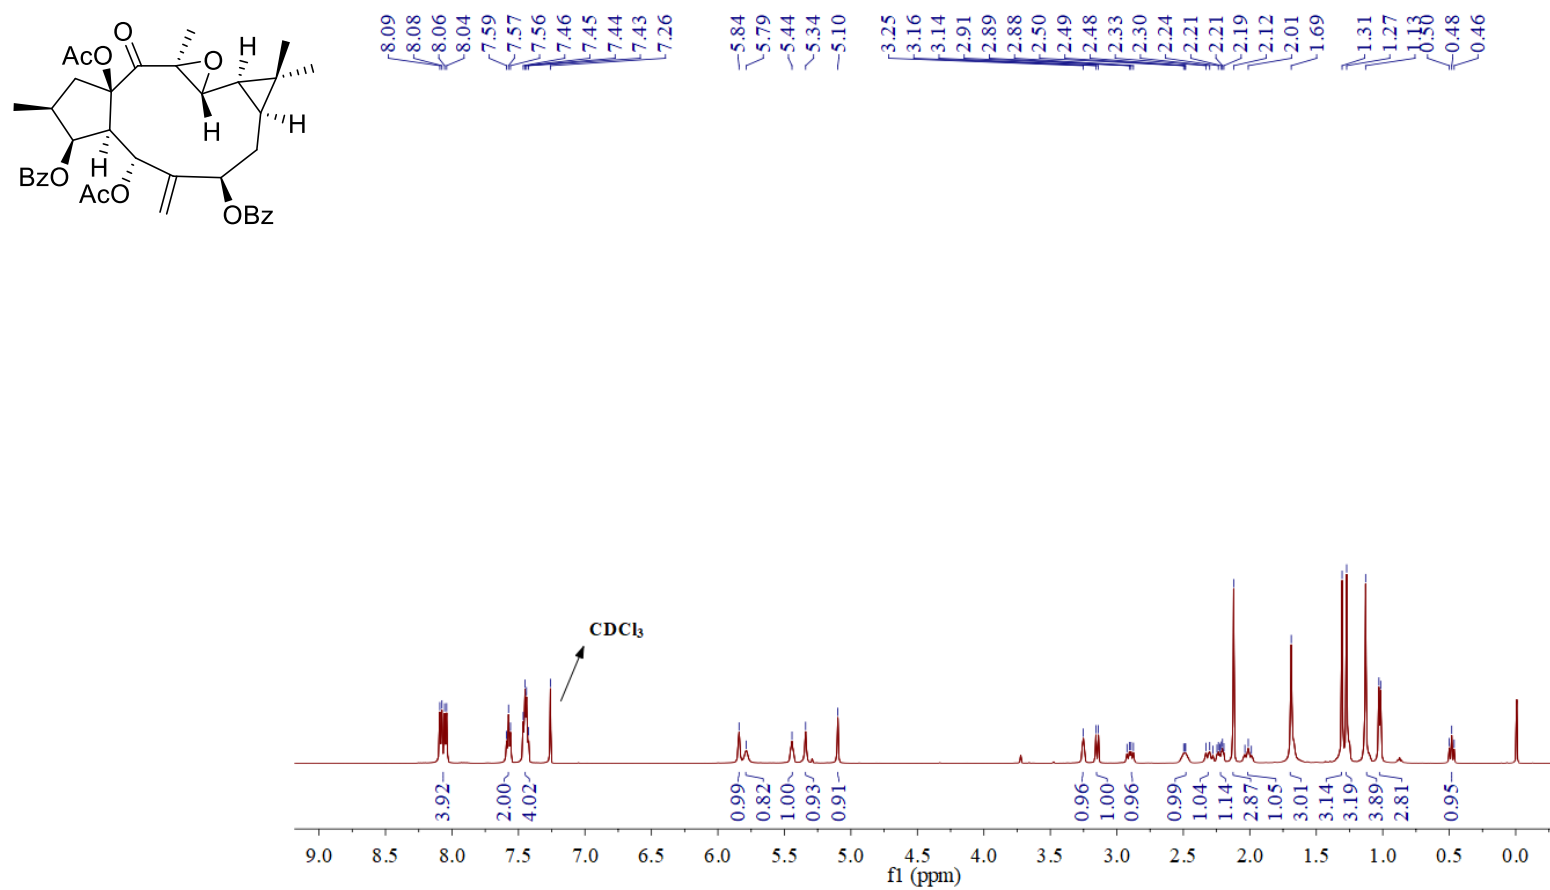

Figure S64.  $^{13}\text{C}$  NMR and DEPT 135 spectra of **25** in  $\text{CDCl}_3$ .

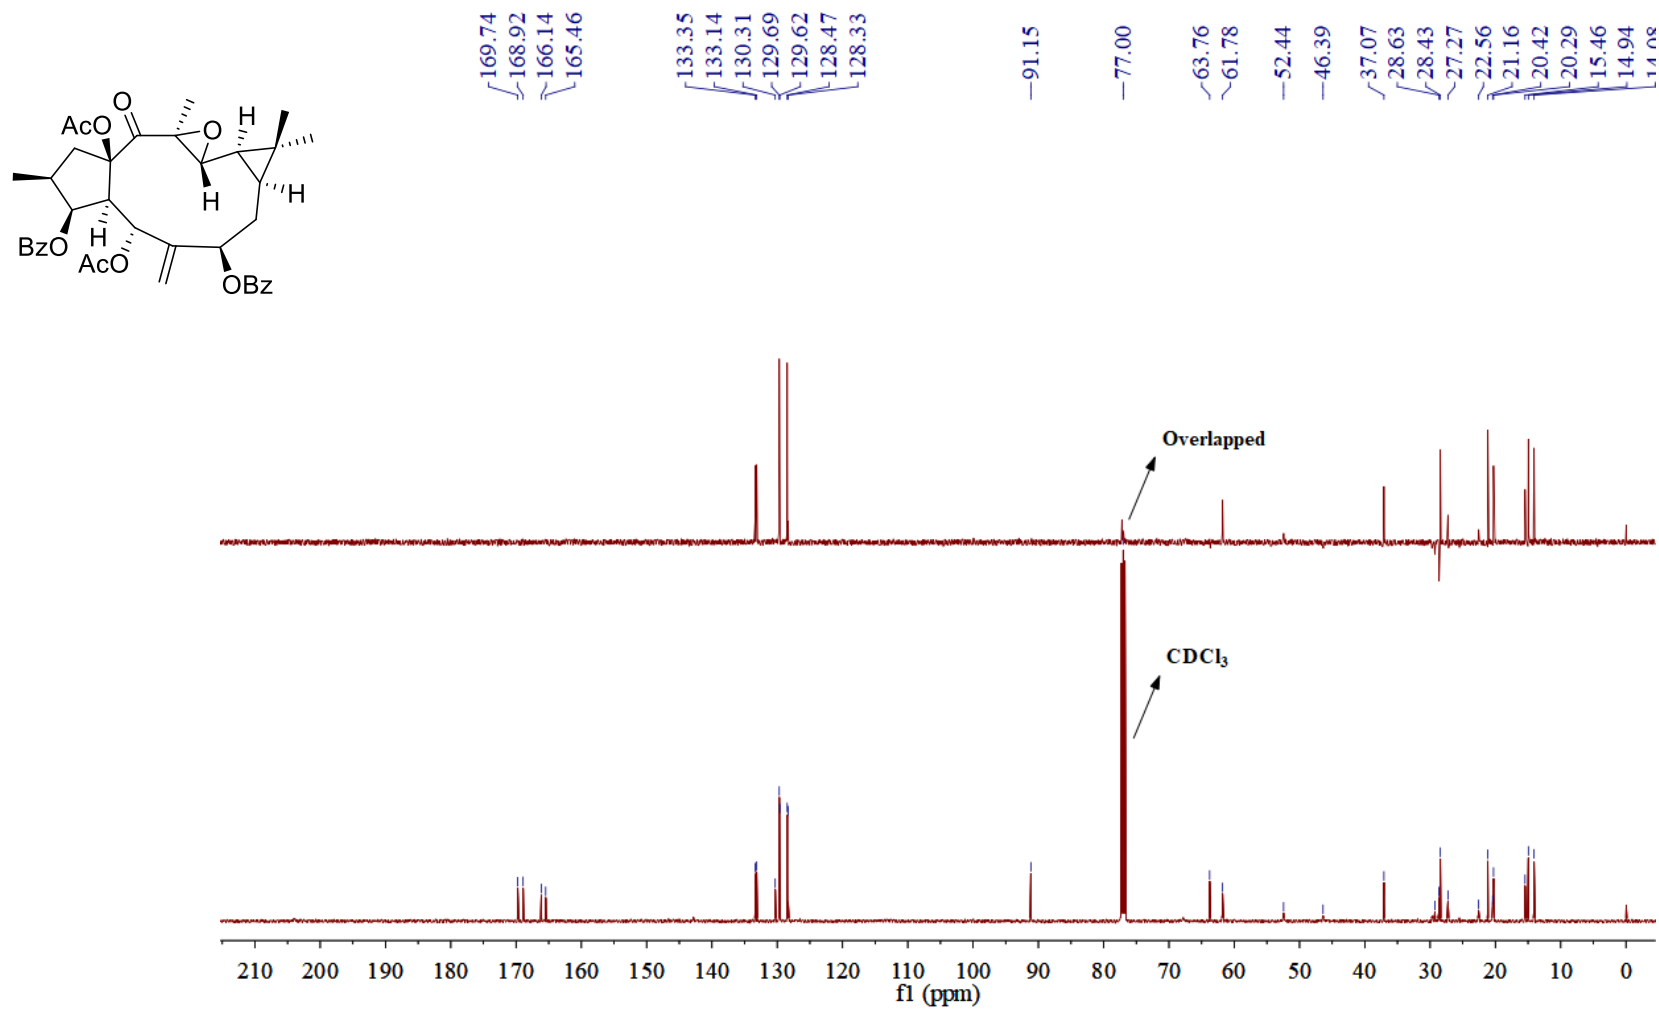

Figure S65. HSQC spectrum of **25** in CDCl<sub>3</sub>.

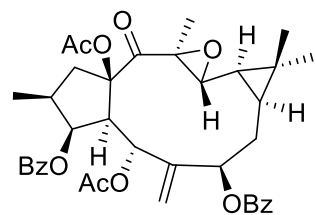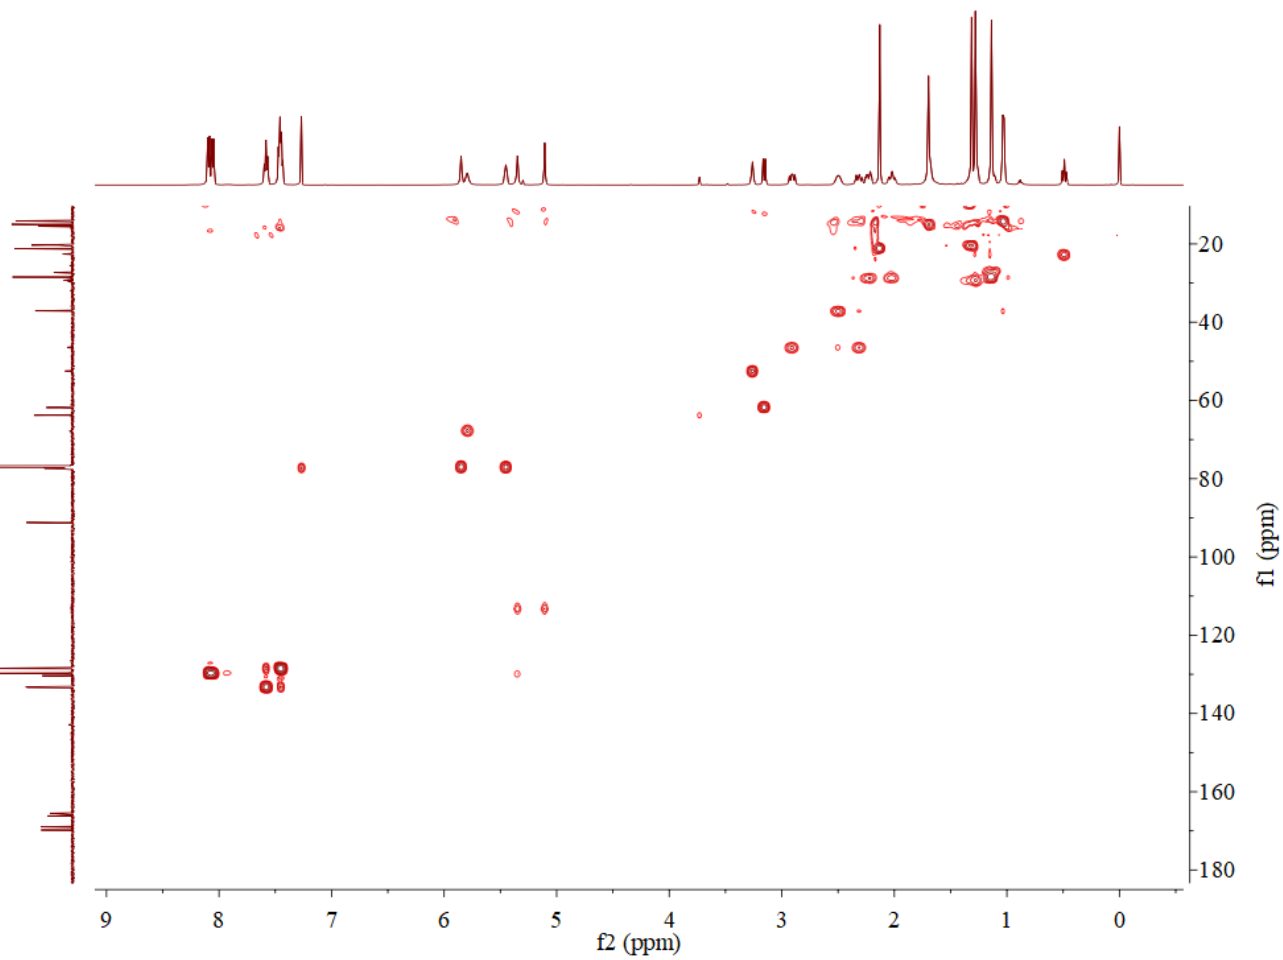

Figure S66. HMBC spectrum of **25** in CDCl<sub>3</sub>.

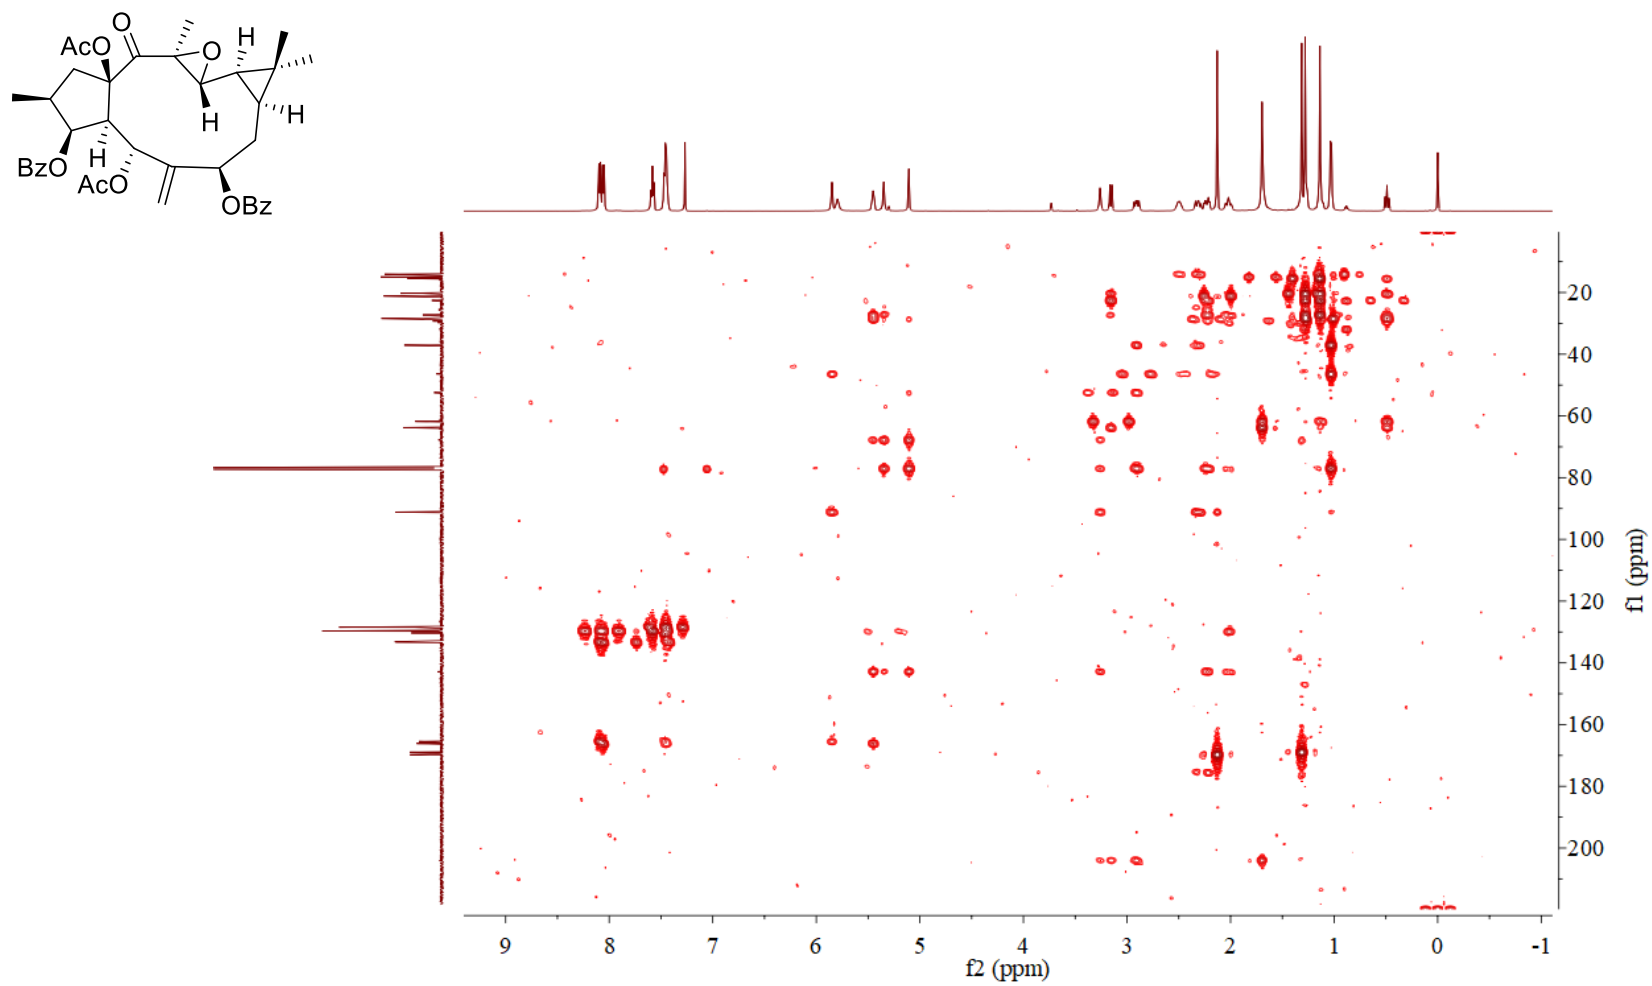

Figure S67.  $^1\text{H}$ - $^1\text{H}$  COSY spectrum of **25** in  $\text{CDCl}_3$ .

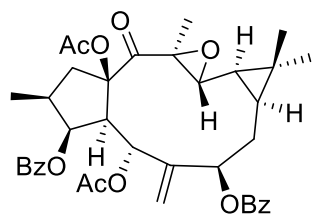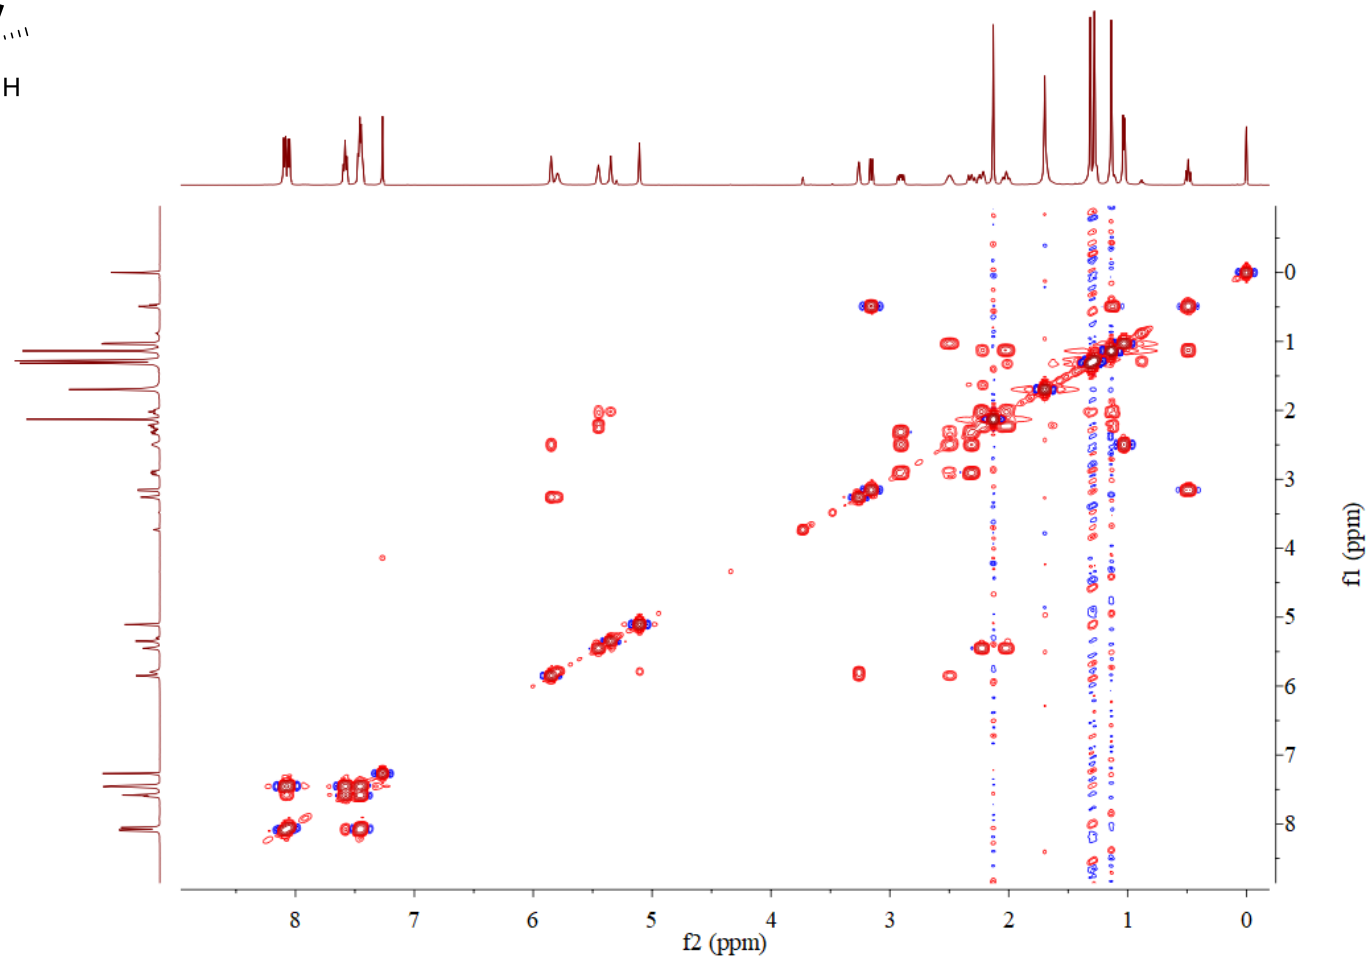

Figure S68. NOESY spectrum of **25** in CDCl<sub>3</sub>.

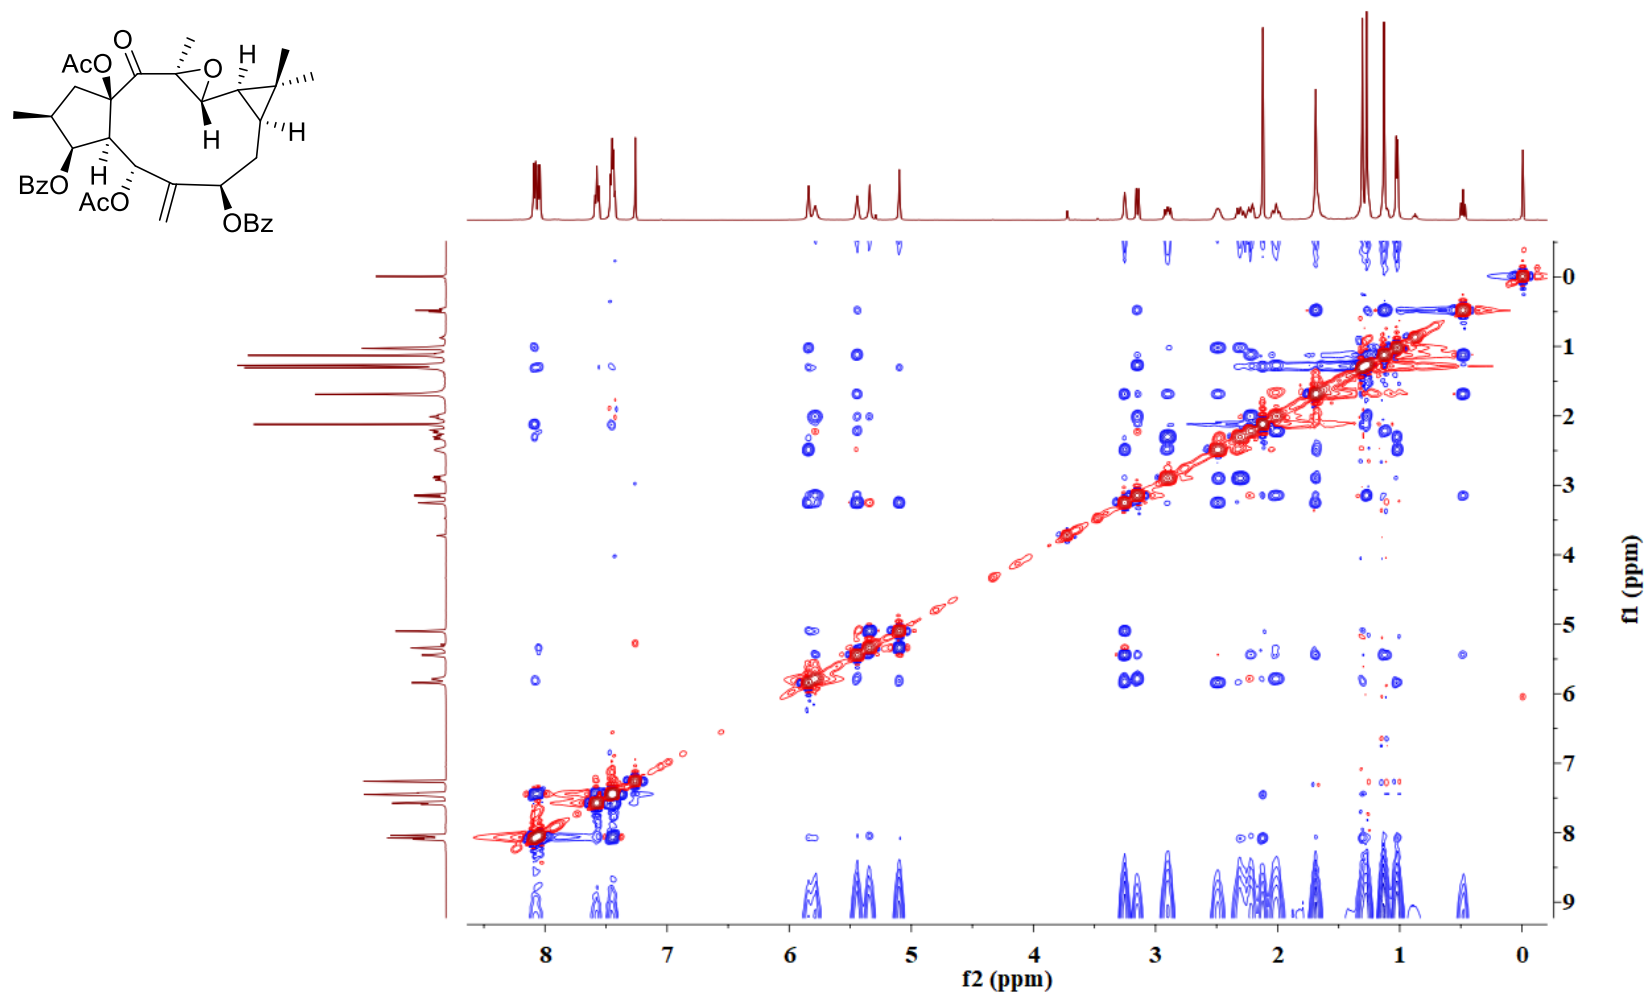

Figure S69. <sup>1</sup>H NMR spectrum of **26** in CDCl<sub>3</sub>.

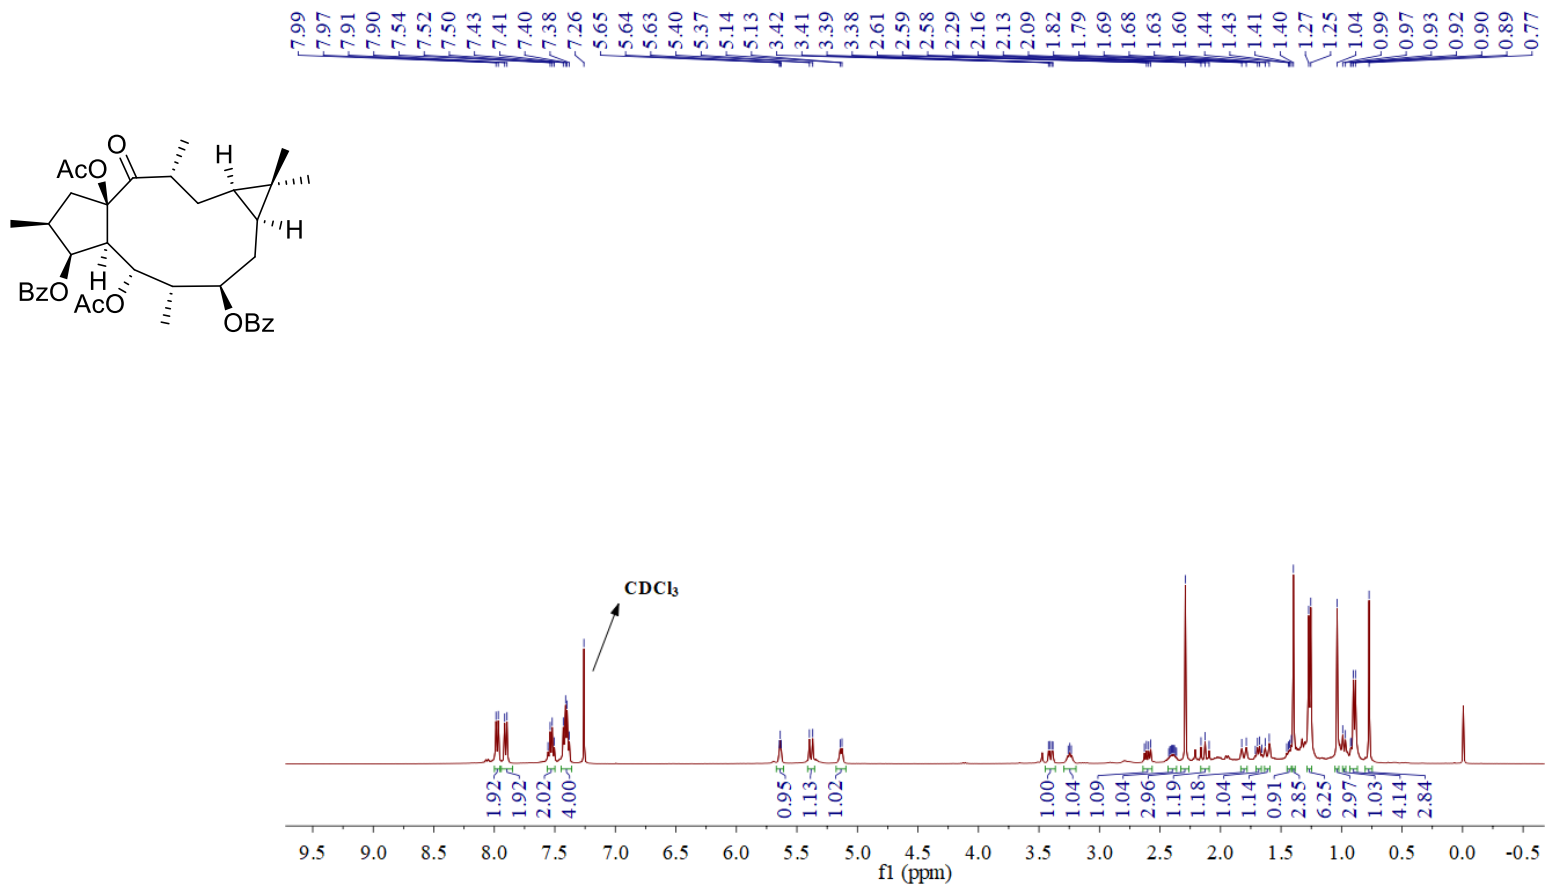

Figure S70.  $^{13}\text{C}$  NMR and DEPT 135 spectra of **26** in  $\text{CDCl}_3$ .

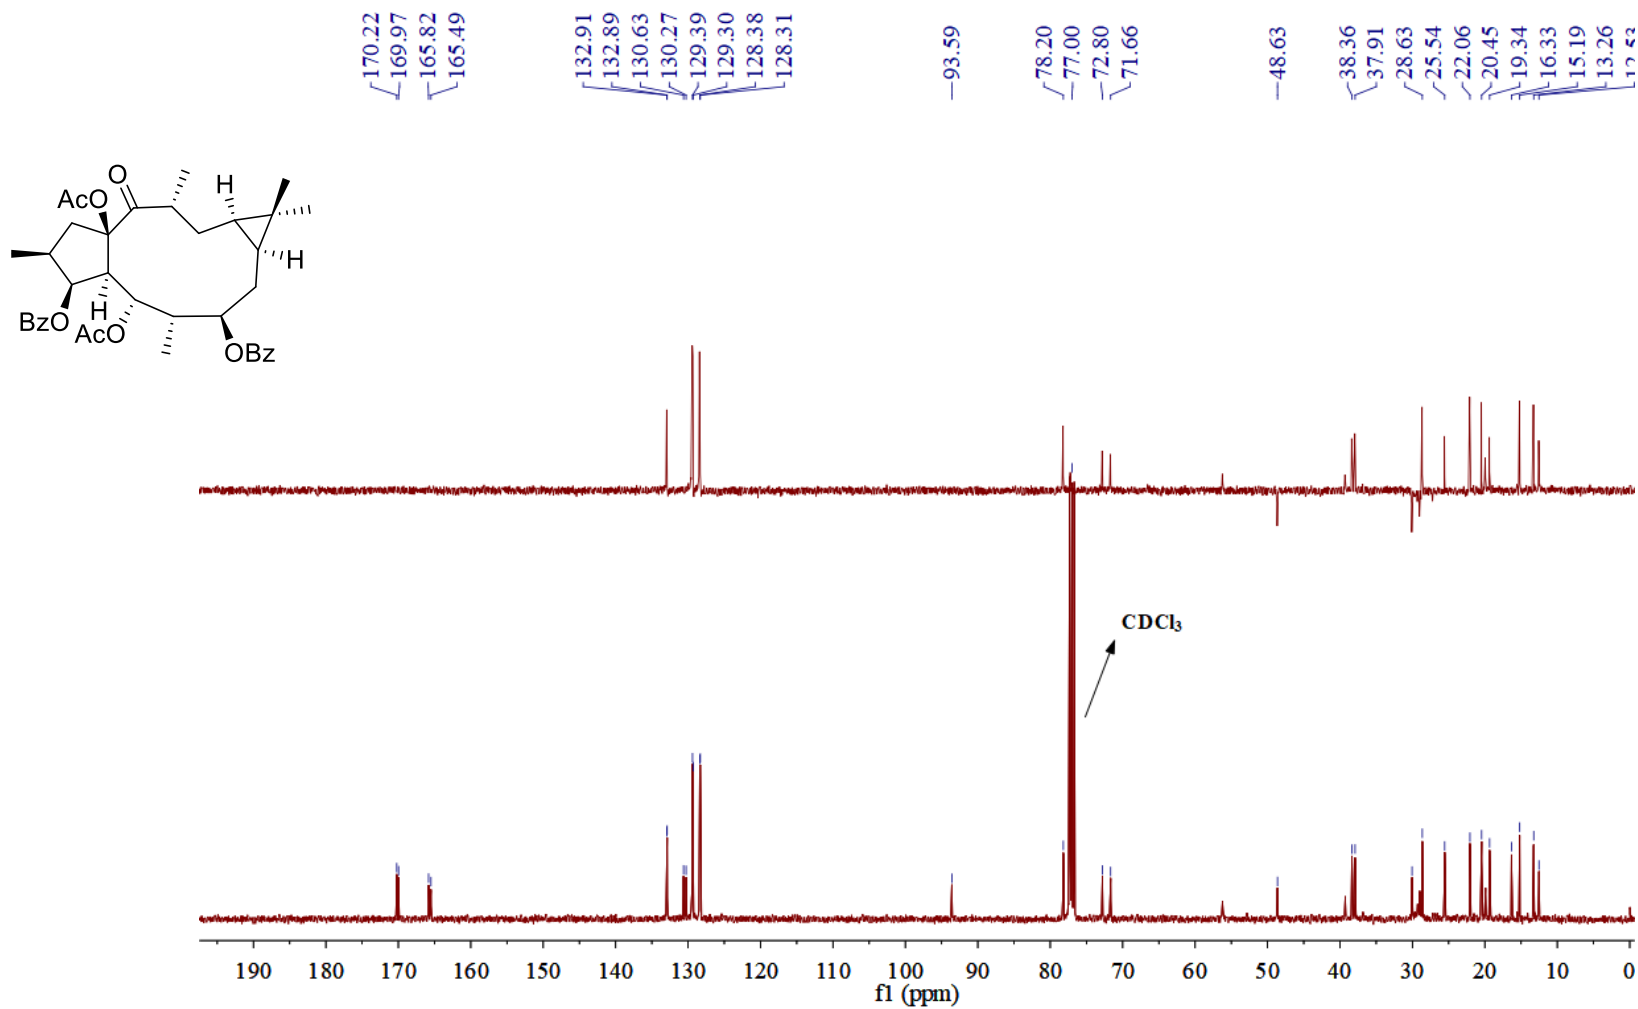



Figure S71. HSQC spectrum of **26** in CDCl<sub>3</sub>.

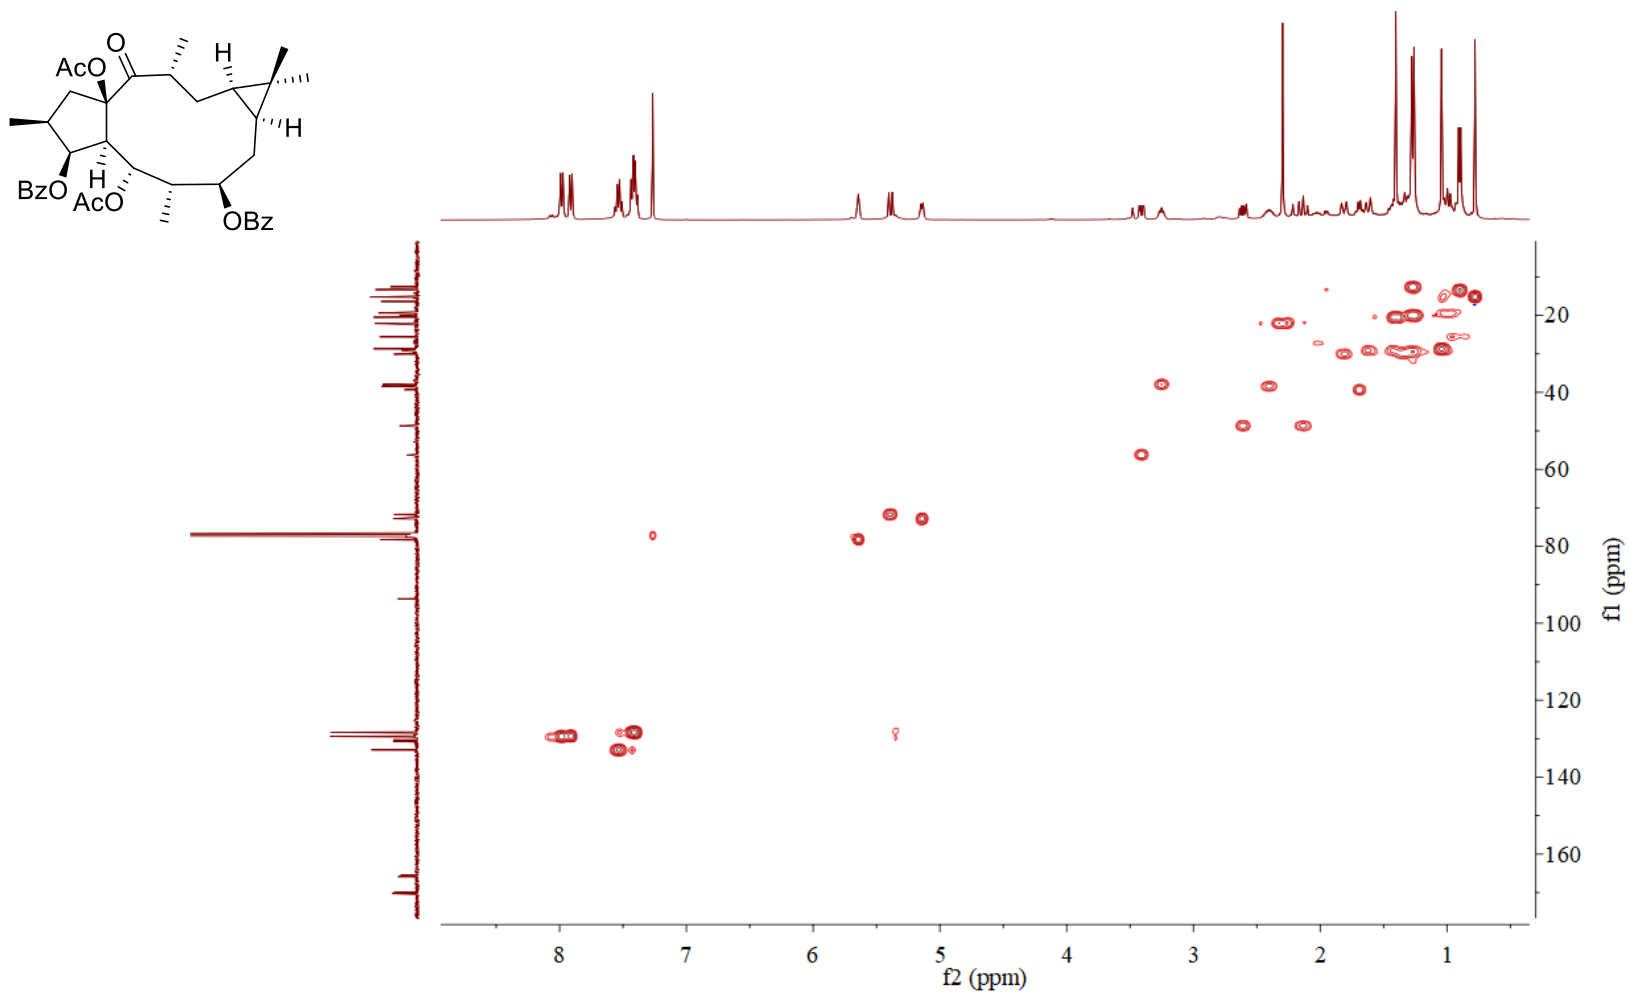

Figure S72. HMBC spectrum of **26** in CDCl<sub>3</sub>.

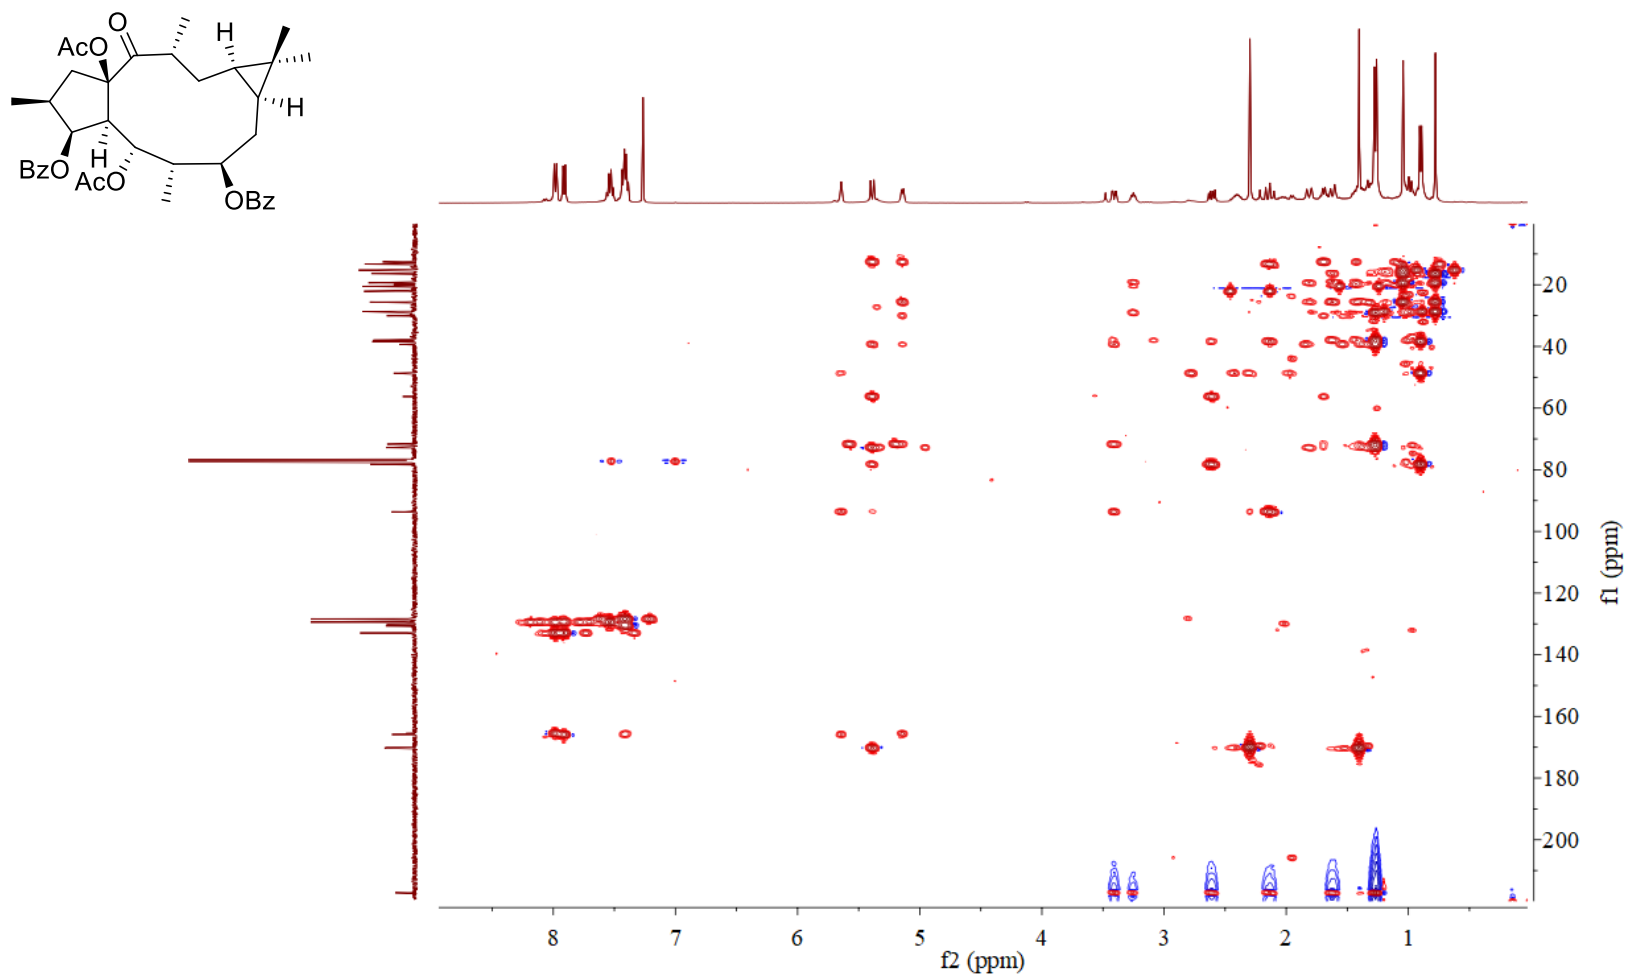

Figure S73.  $^1\text{H}$ - $^1\text{H}$  NMR spectrum of **26** in  $\text{CDCl}_3$ .

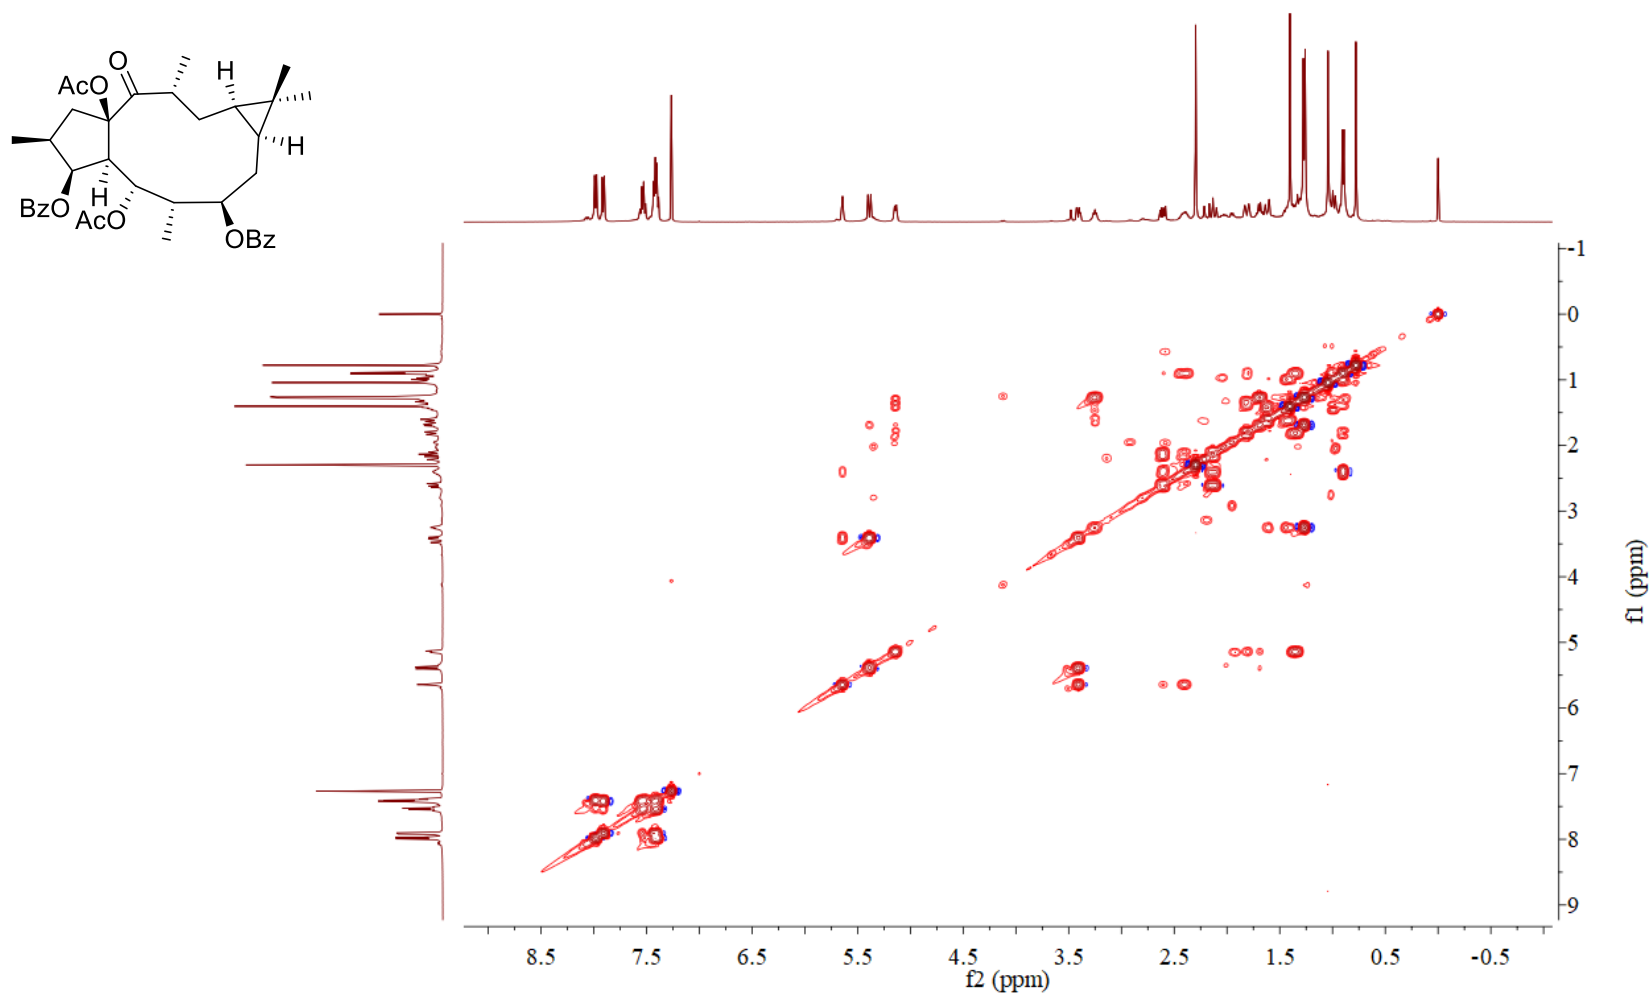

Figure S74. NOESY spectrum of **26** in CDCl<sub>3</sub>.

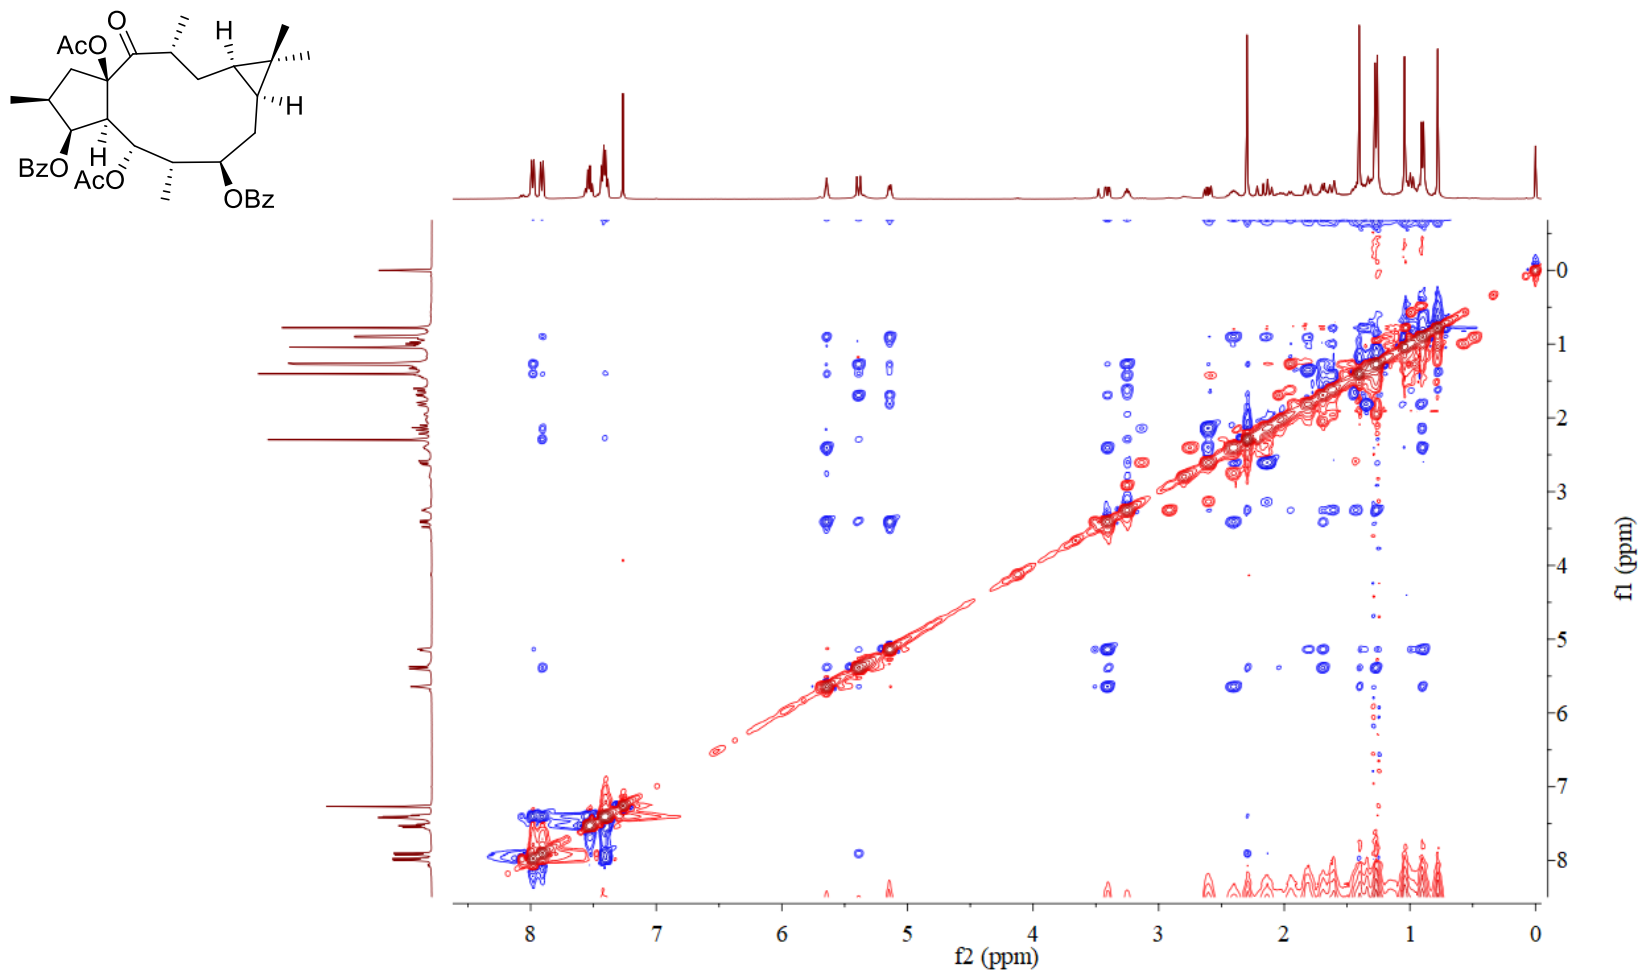

Figure S75.  $^1\text{H}$  NMR spectrum of **28** in  $\text{CDCl}_3$ .

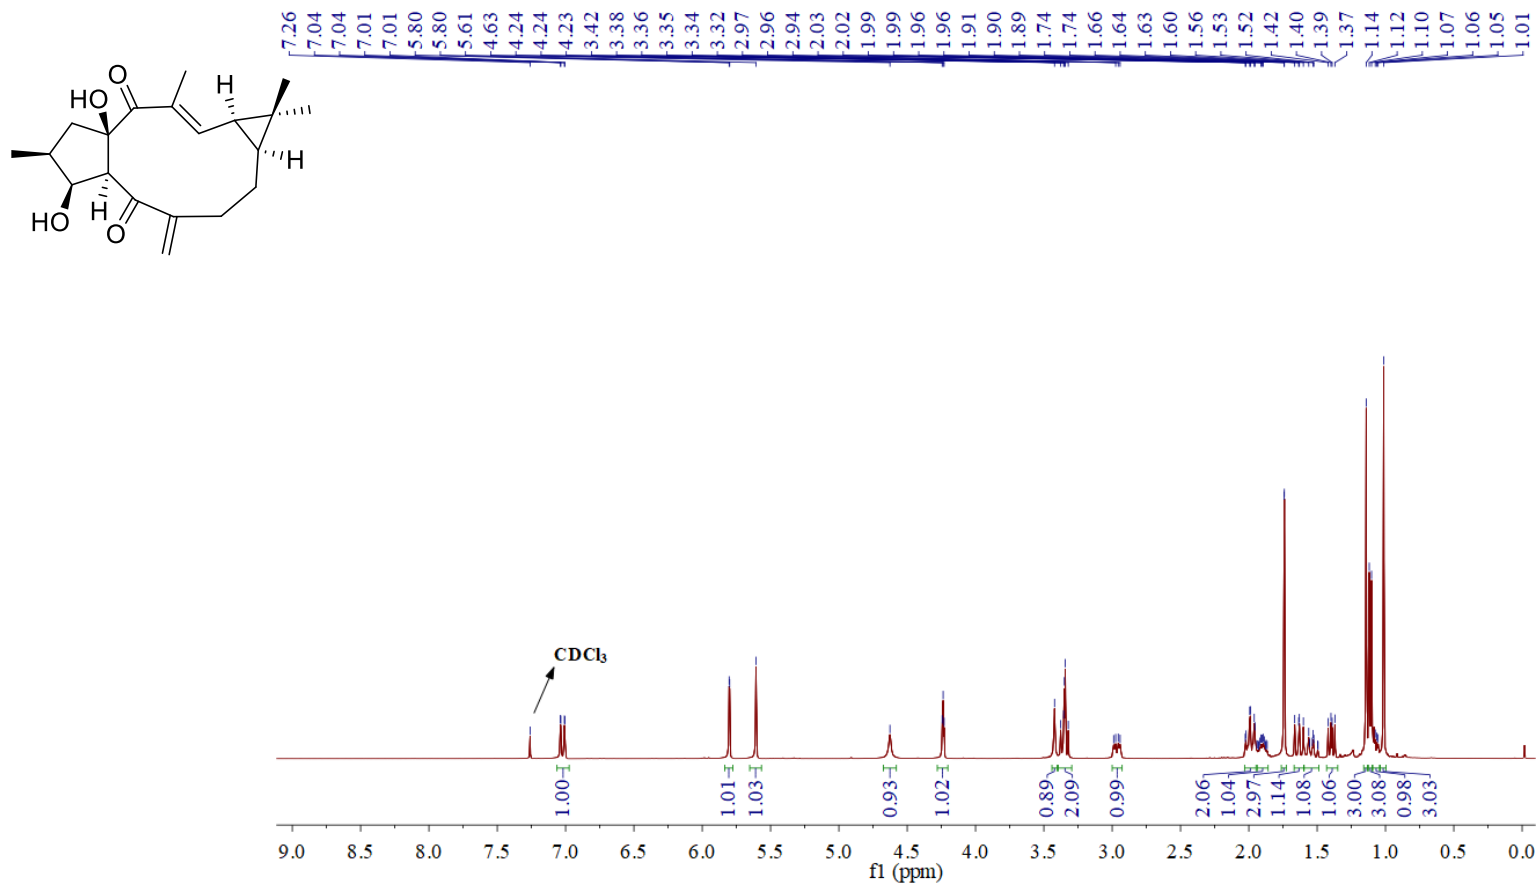

Figure S76.  $^{13}\text{C}$  NMR and DEPT 135 spectra of **28** in  $\text{CDCl}_3$ .

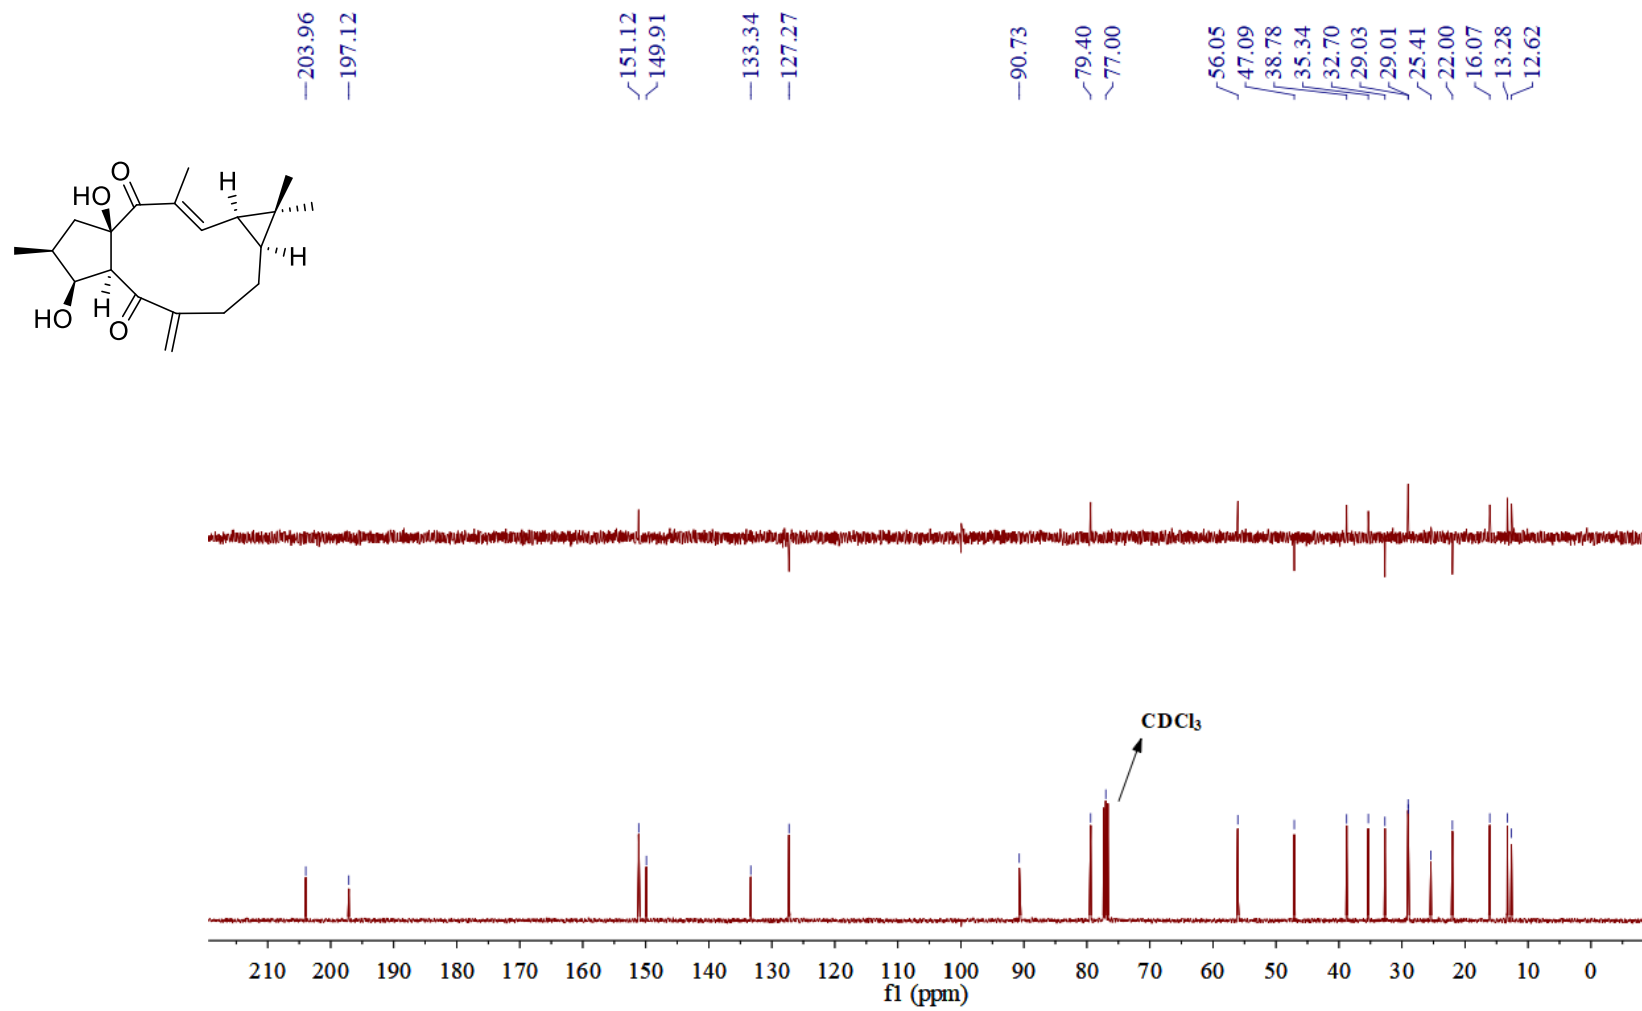

Figure S77. HSQC spectrum of **28** in CDCl<sub>3</sub>.

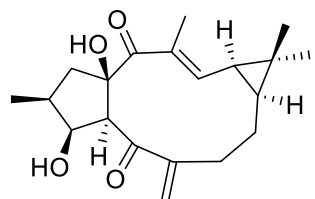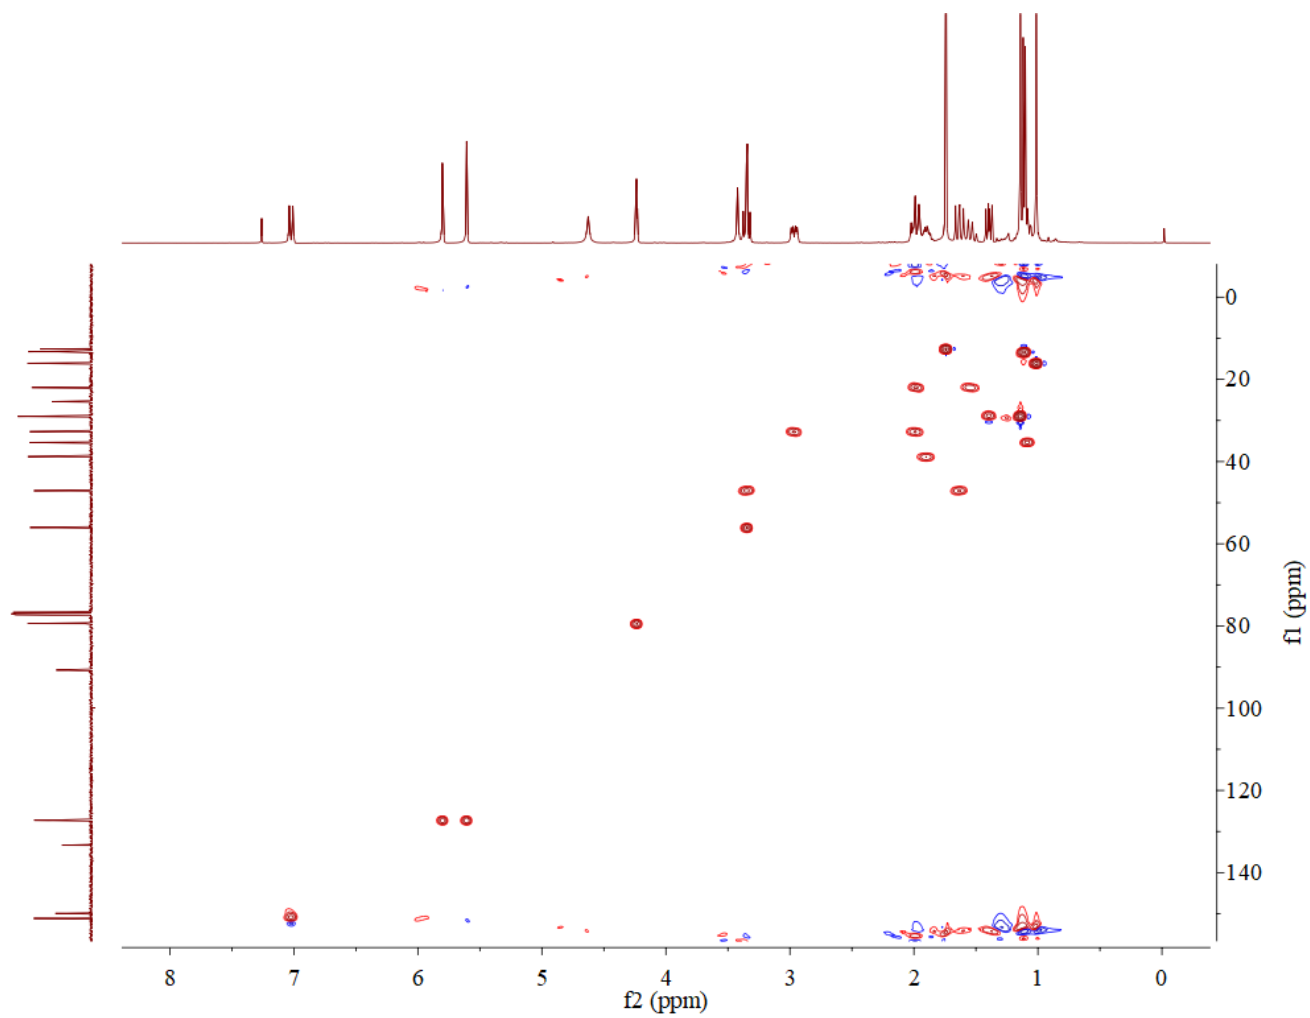

S103

Figure S78. HMBC spectrum of **28** in CDCl<sub>3</sub>.

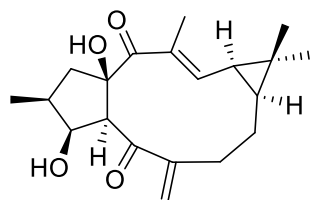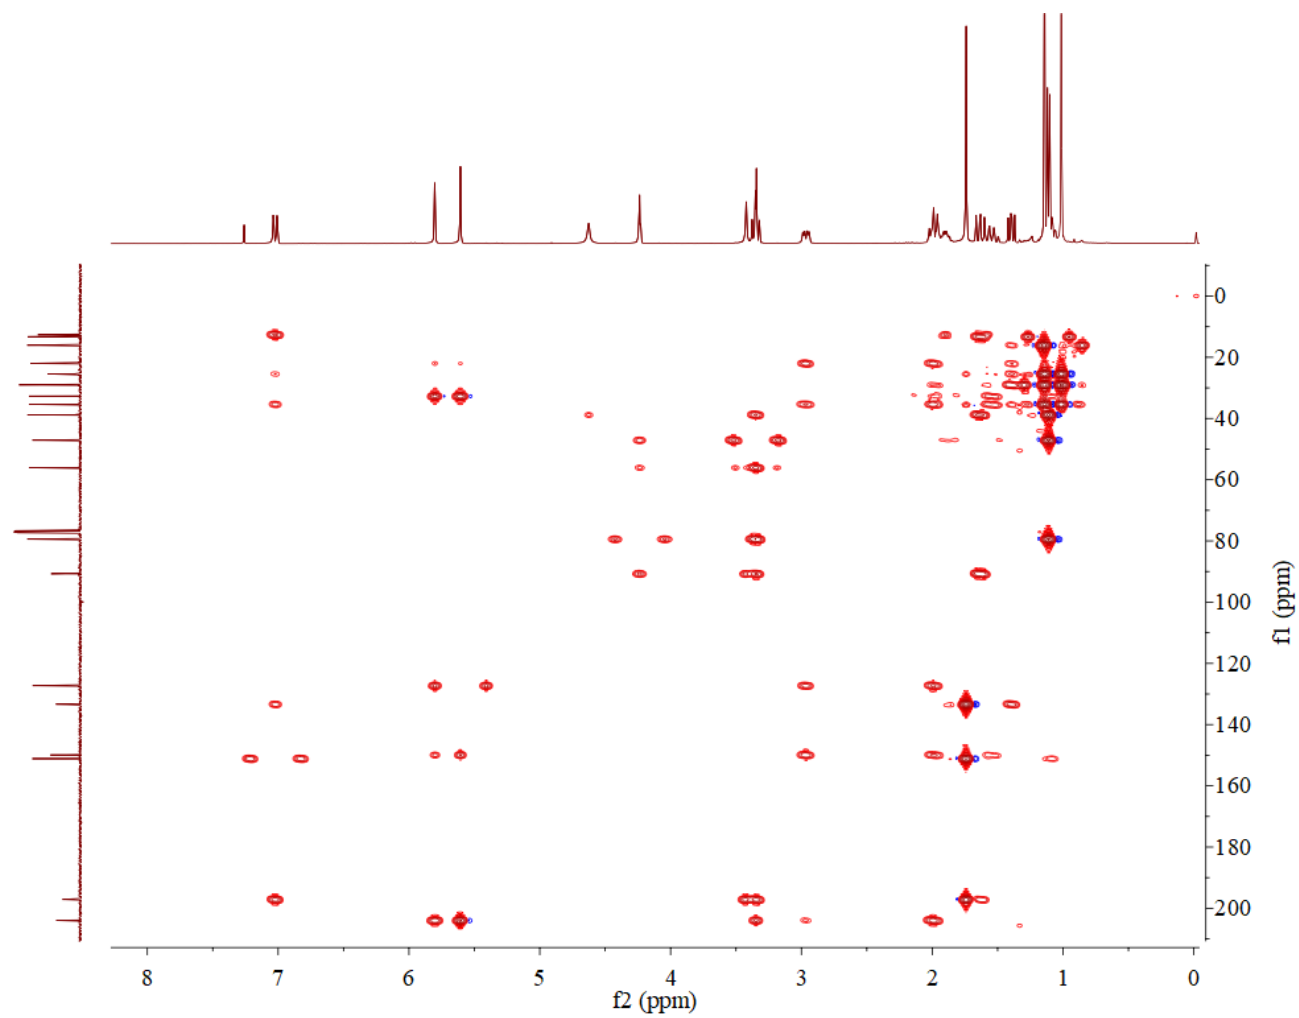



Figure S79.  $^1\text{H}$ - $^1\text{H}$  COSY spectrum of **28** in  $\text{CDCl}_3$ .

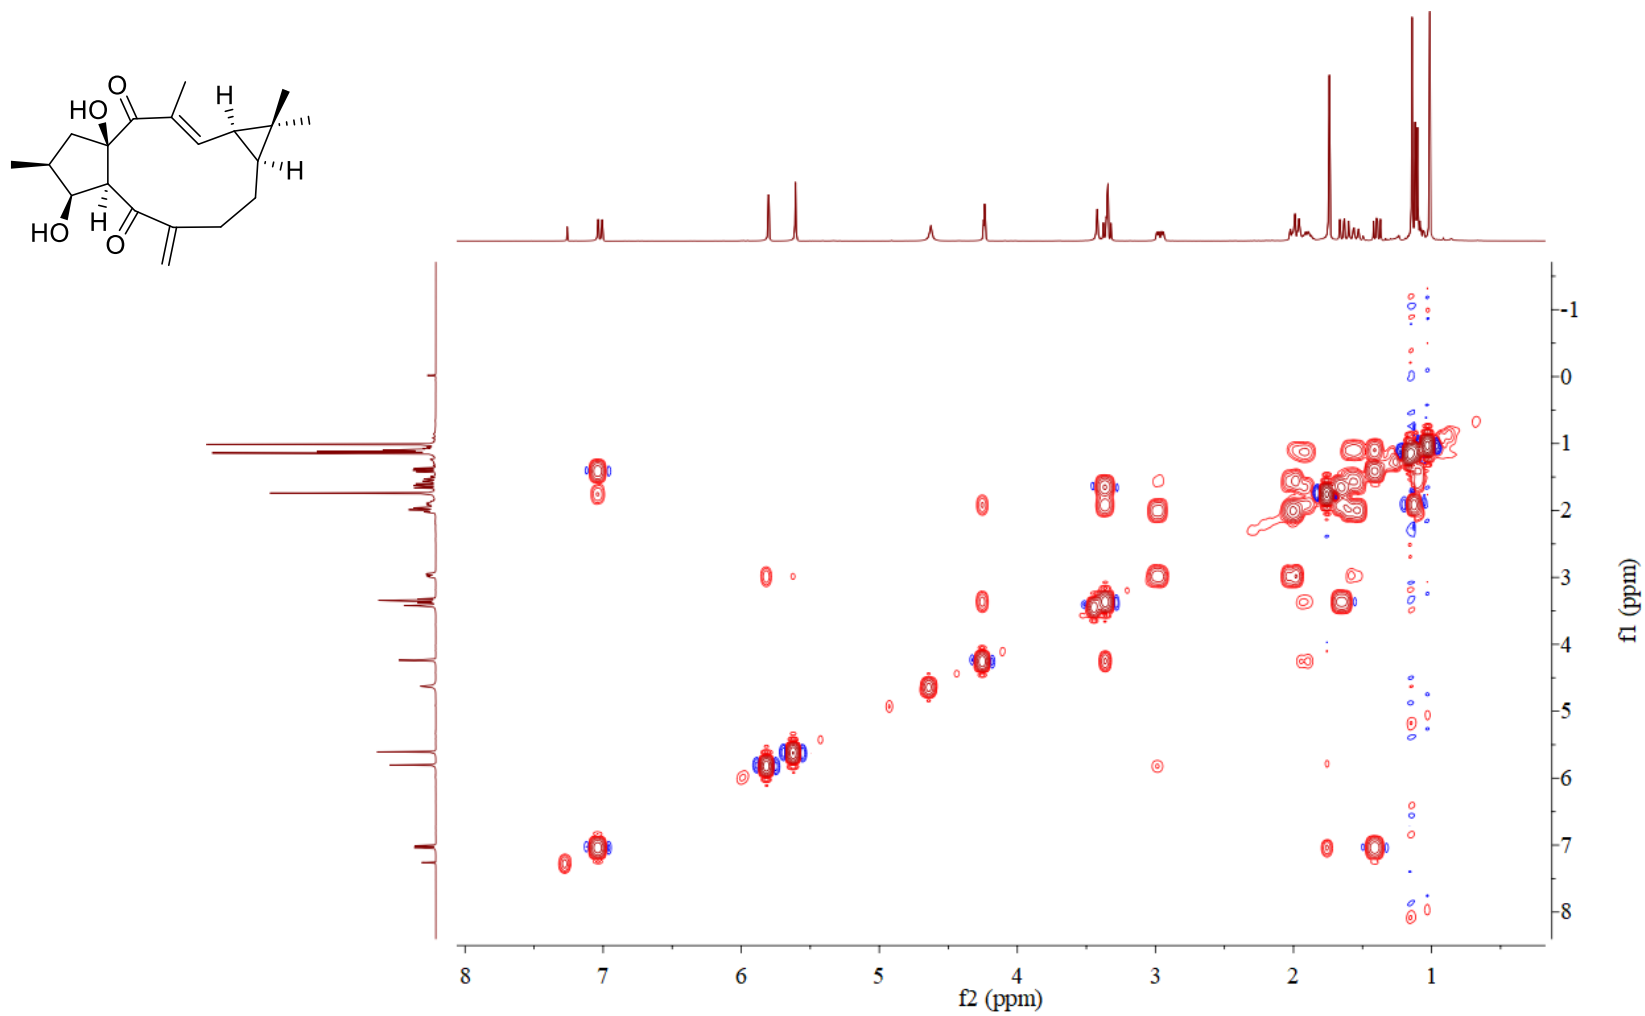

S105

Figure S80. <sup>1</sup>H NMR spectrum of **29** in CDCl<sub>3</sub>.

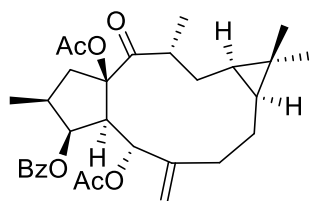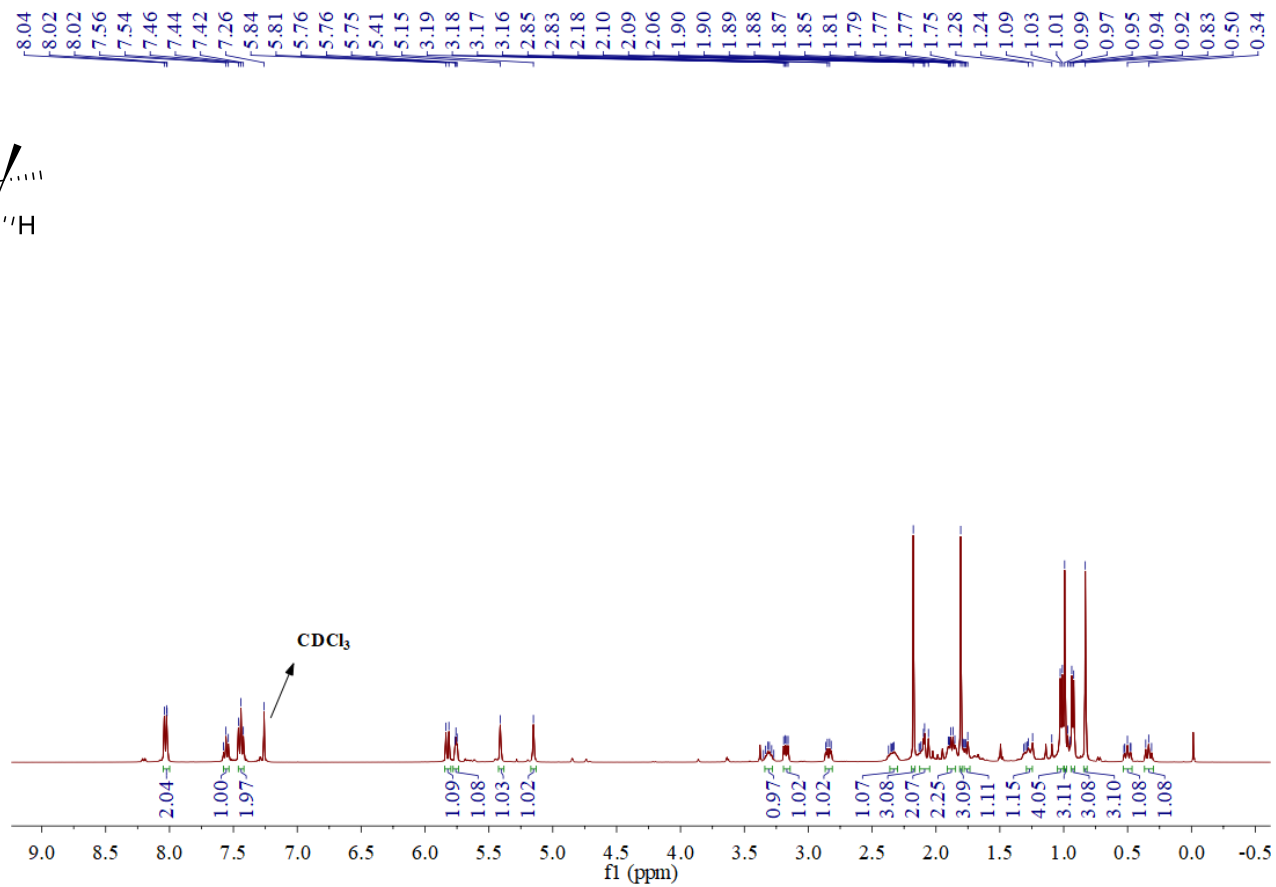

Figure S81.  $^{13}\text{C}$  NMR and DEPT 135 spectra of **29** in  $\text{CDCl}_3$ .

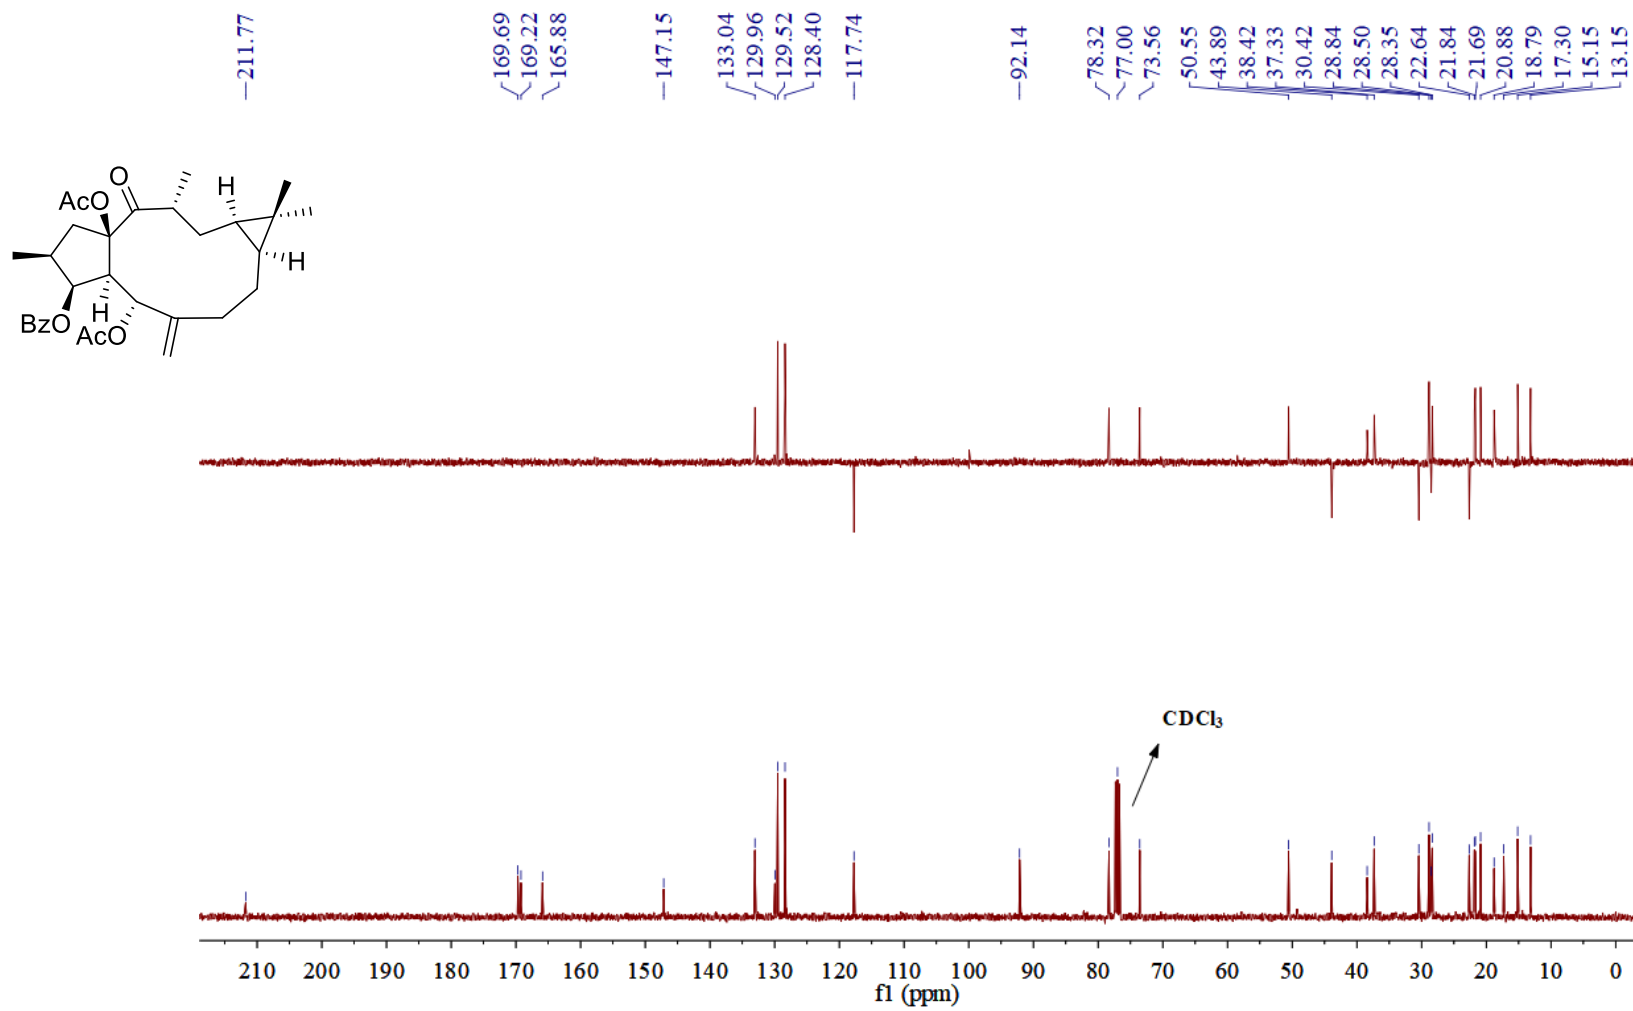

Figure S82. HSQC spectrum of **29** in CDCl<sub>3</sub>.

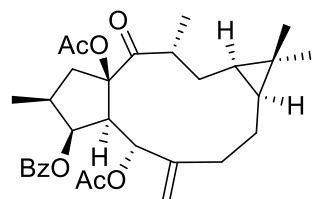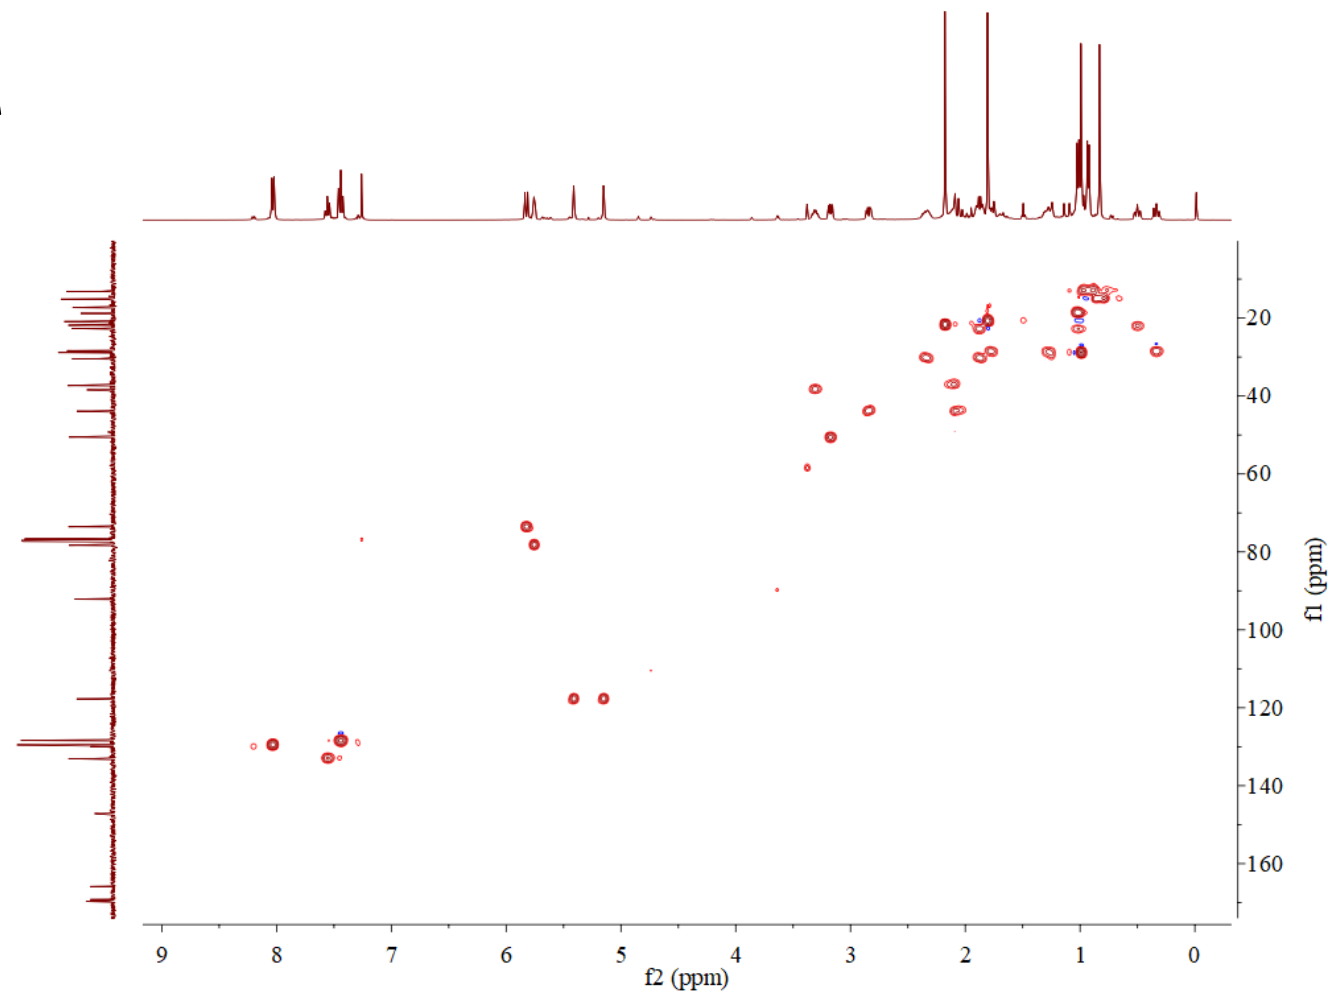

S108

Figure S83. HMBC spectrum of **29** in CDCl<sub>3</sub>.

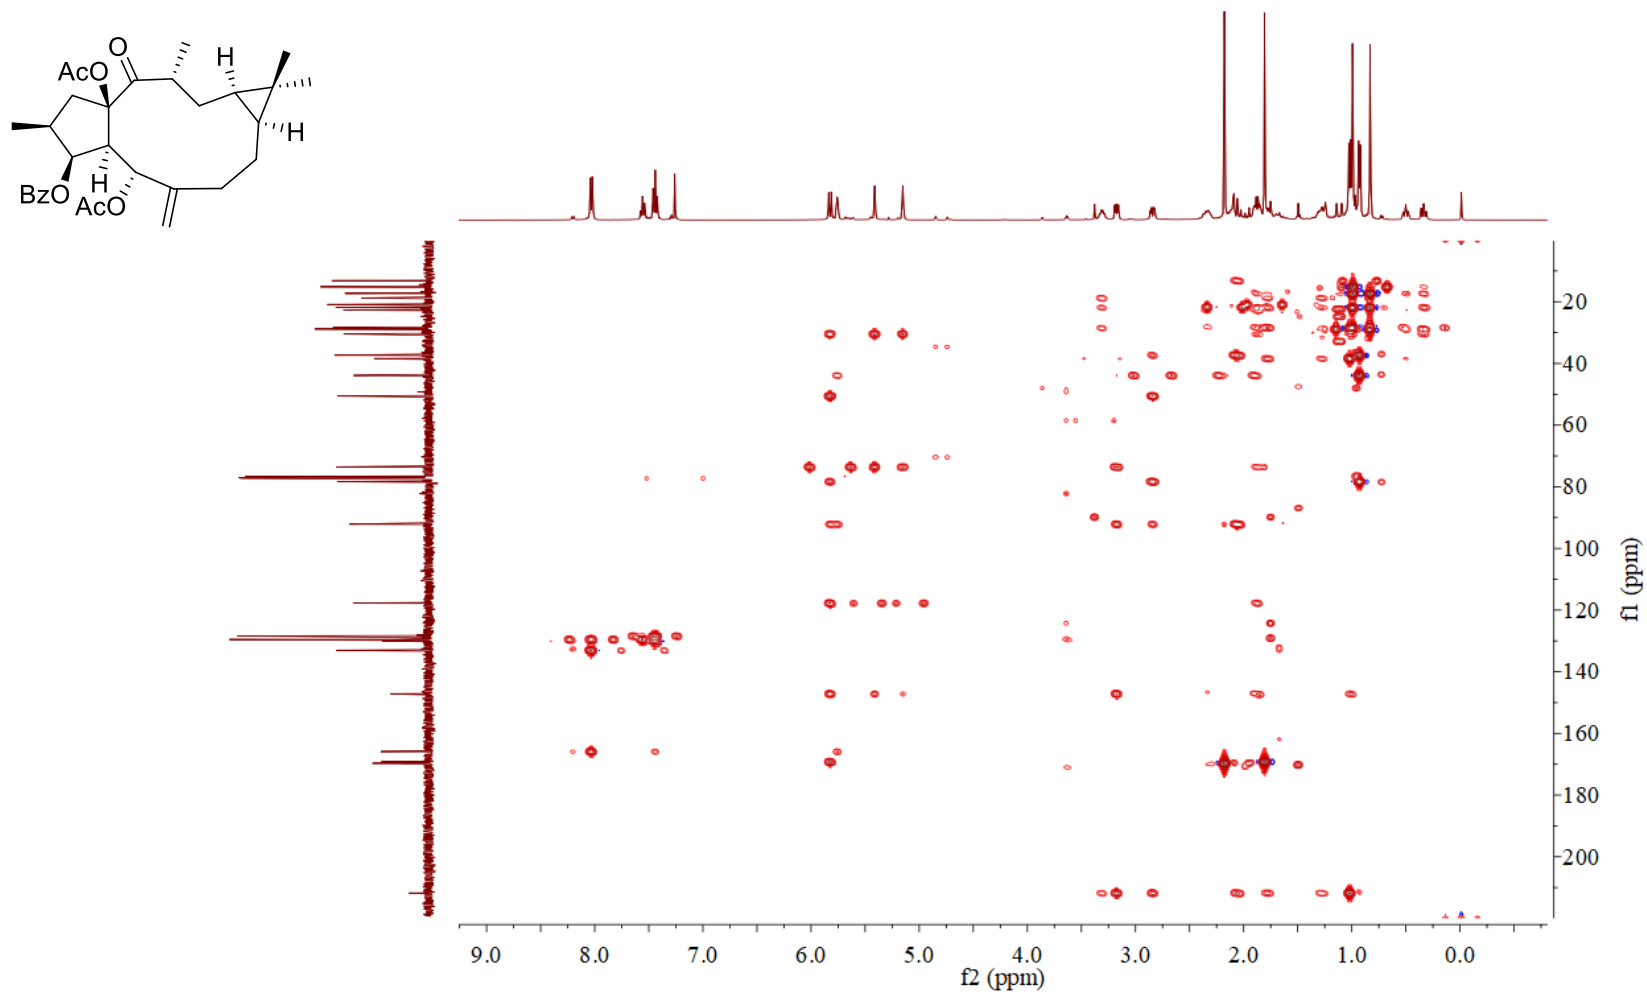

Figure S84.  $^1\text{H}$ - $^1\text{H}$  COSY spectrum of **29** in  $\text{CDCl}_3$ .

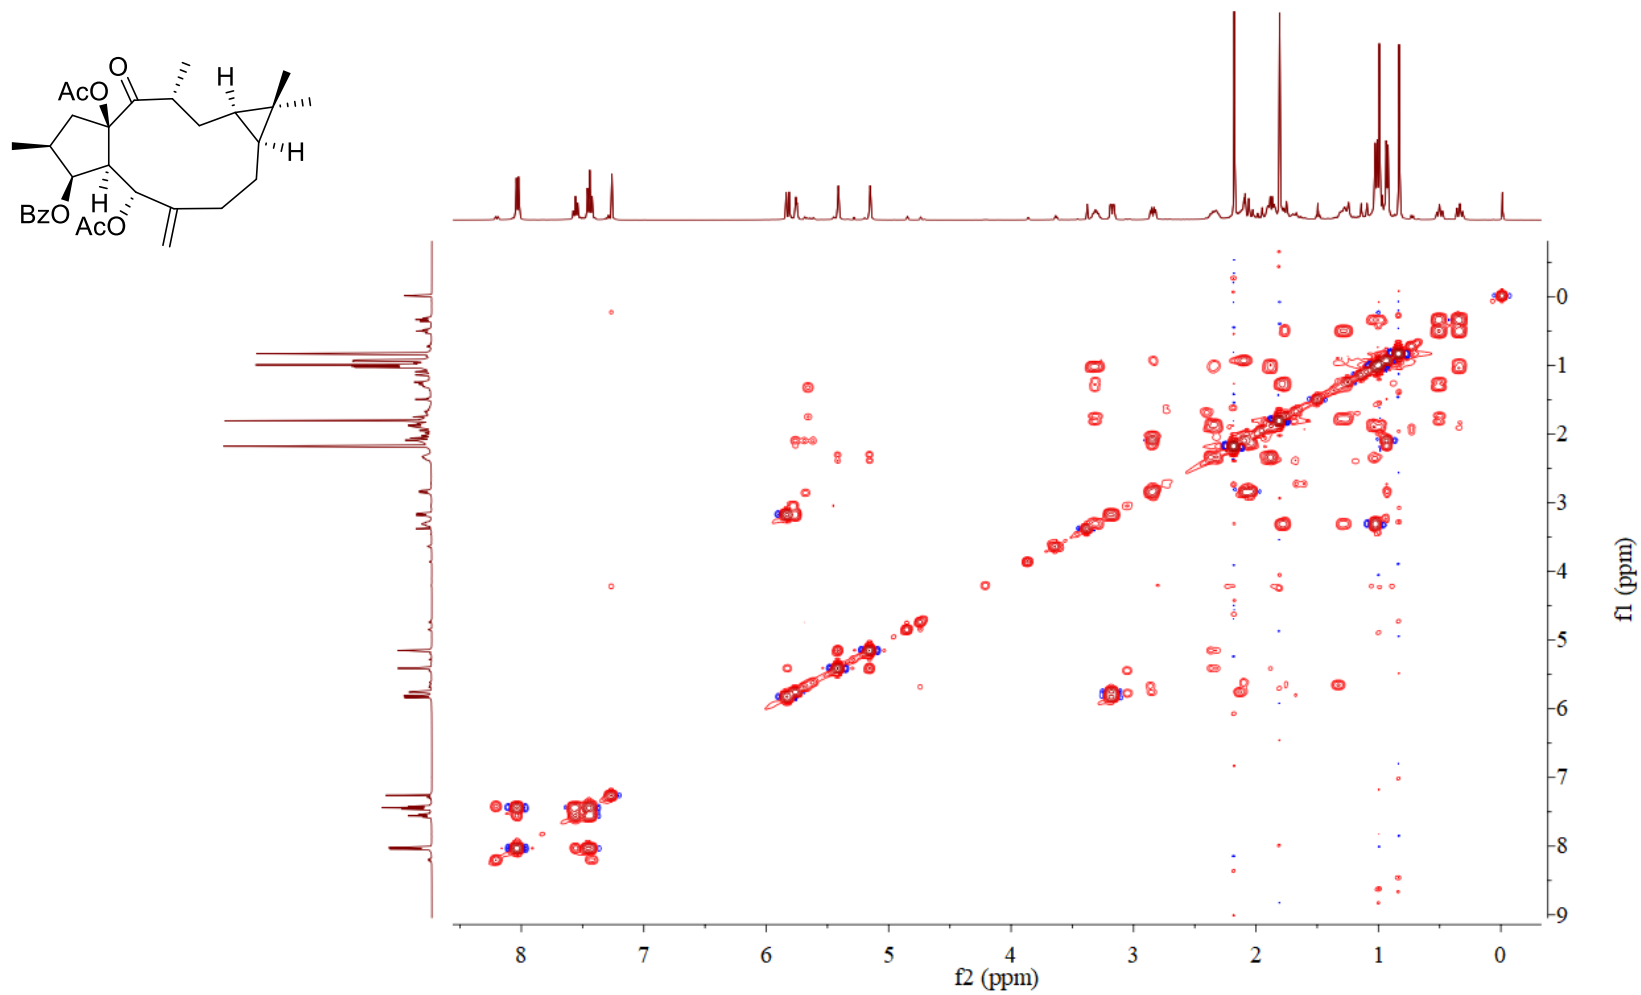

Figure S85. NOESY spectrum of **29** in CDCl<sub>3</sub>.

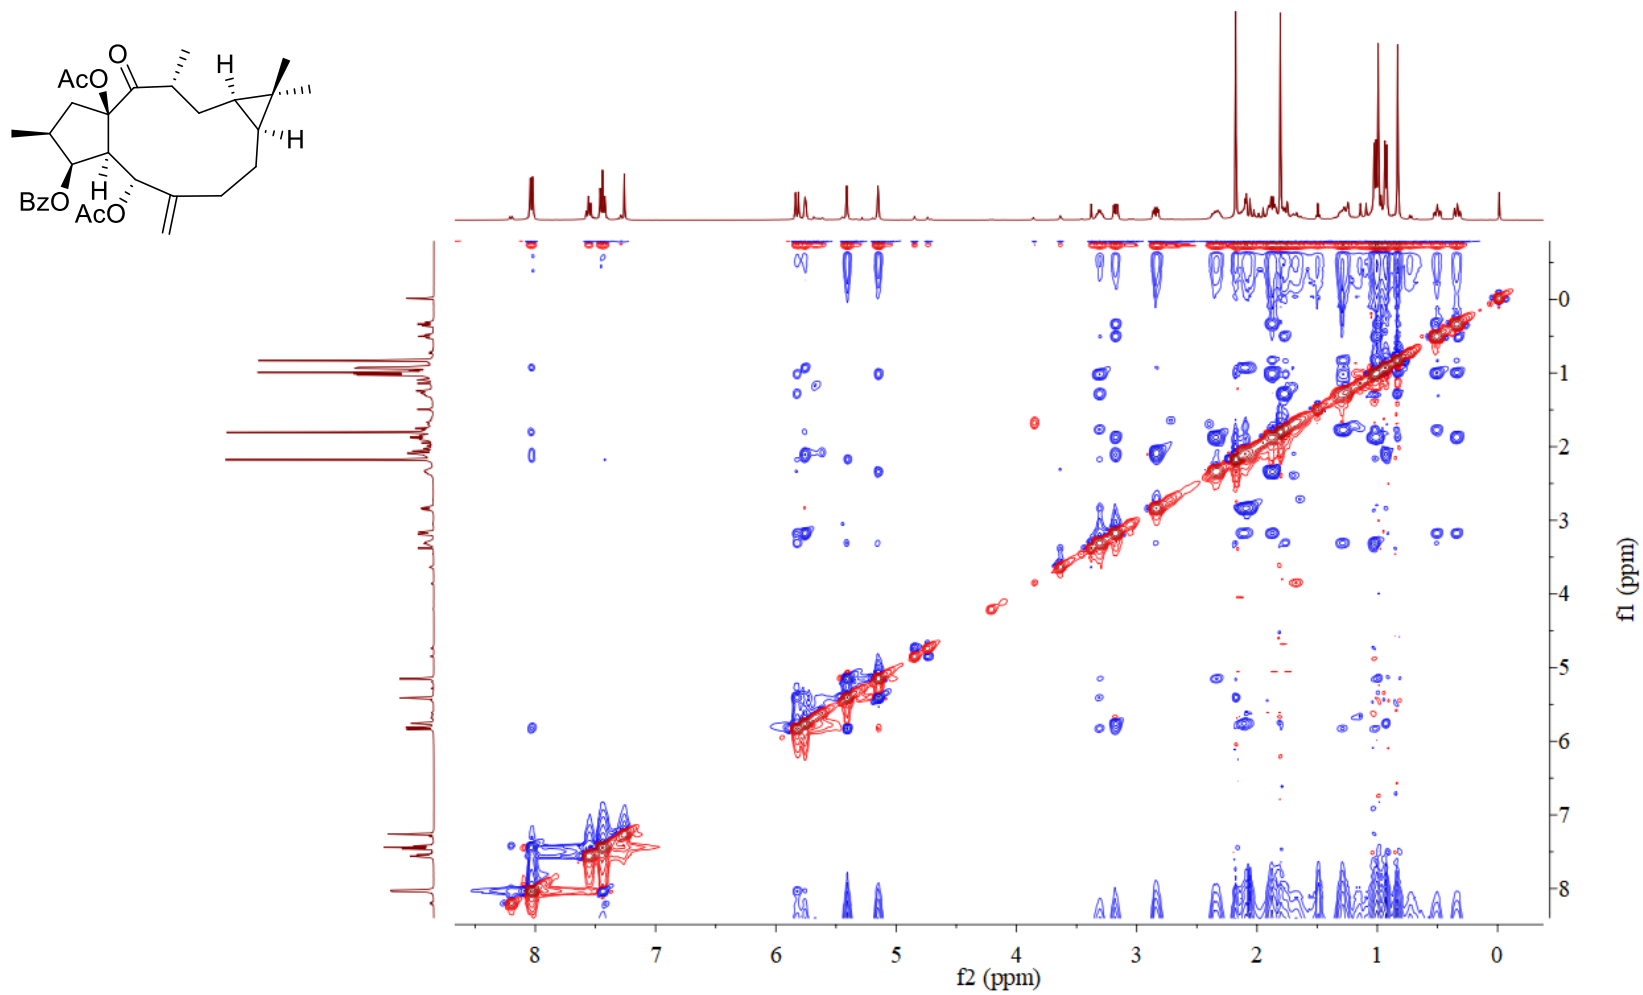

Figure S86. <sup>1</sup>H NMR spectrum of **30** in CDCl<sub>3</sub>.

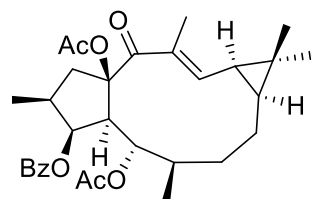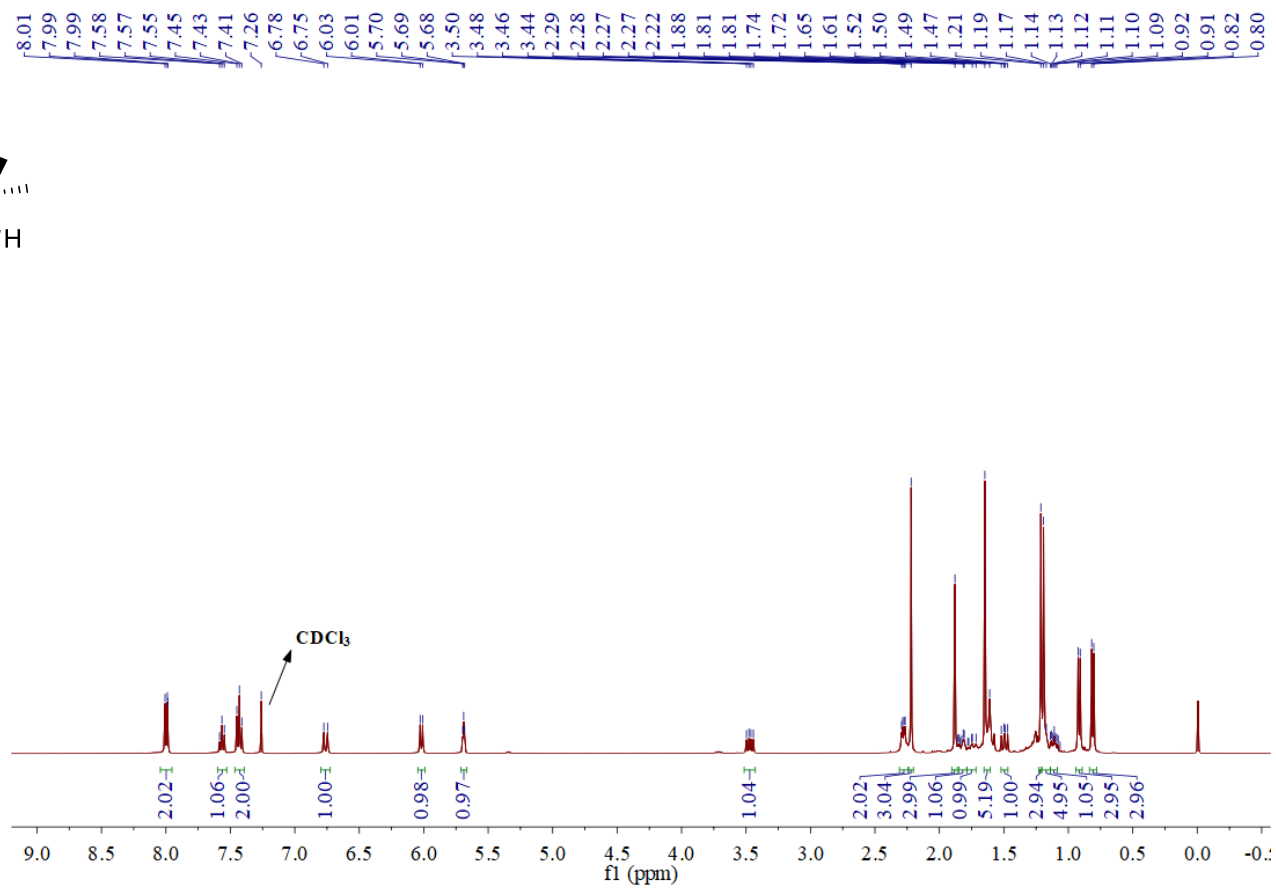



Figure S87.  $^{13}\text{C}$  NMR and DEPT 135 spectra of **30** in  $\text{CDCl}_3$ .

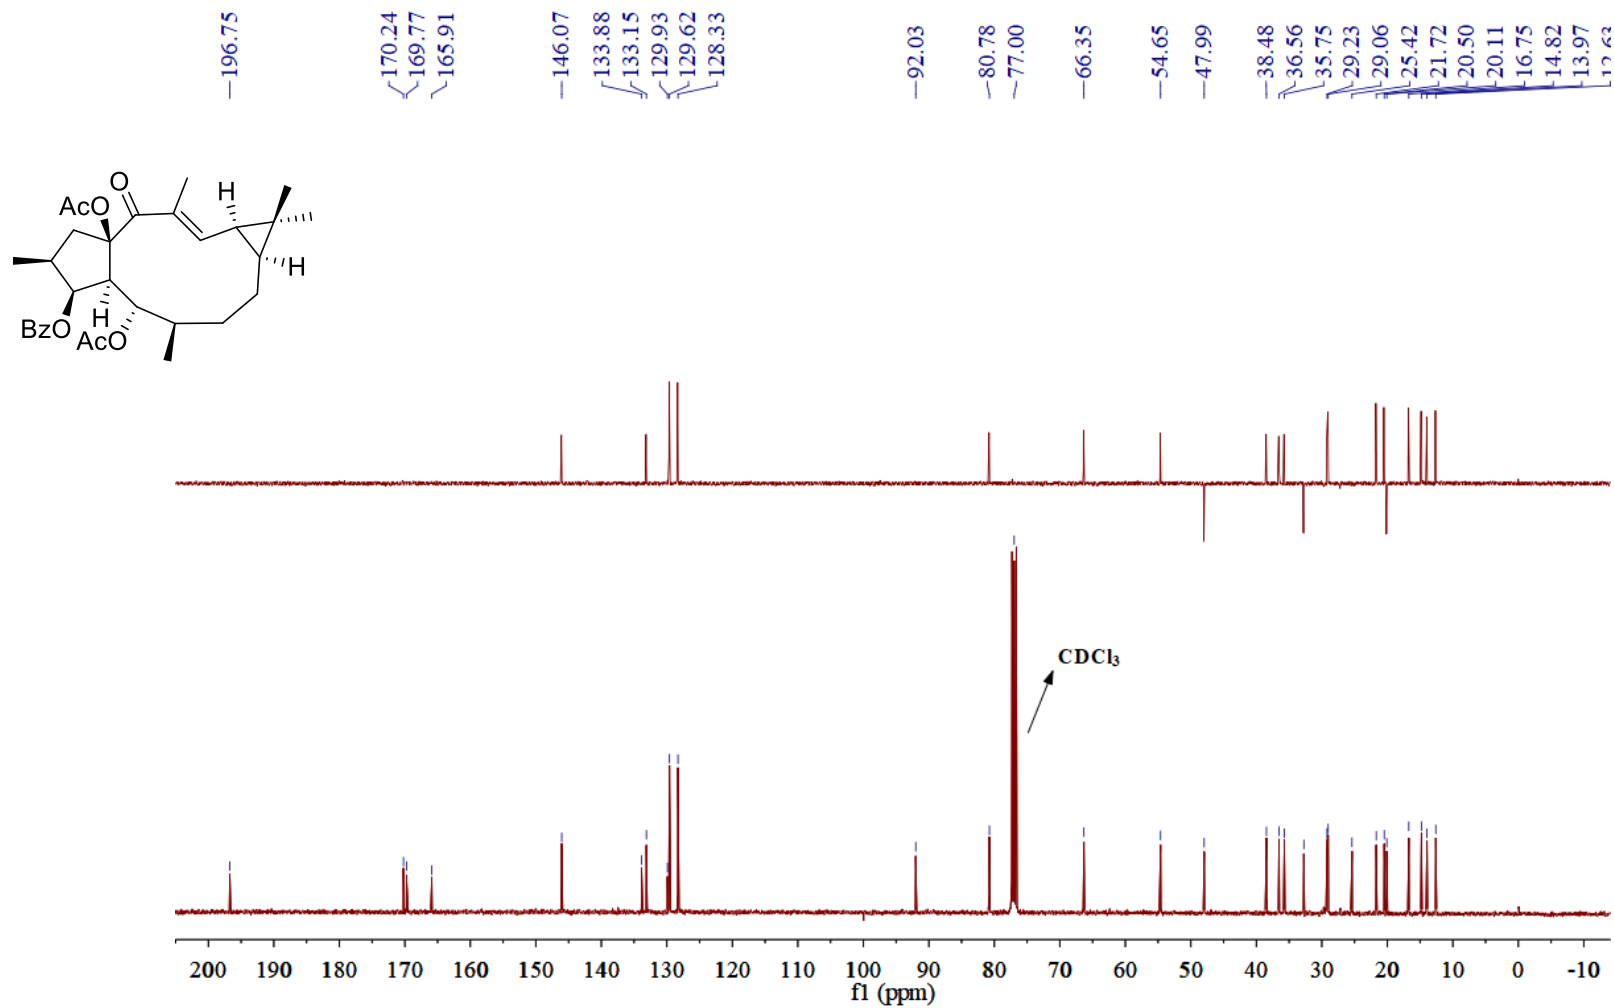

Figure S88. HSQC spectrum of **30** in CDCl<sub>3</sub>.

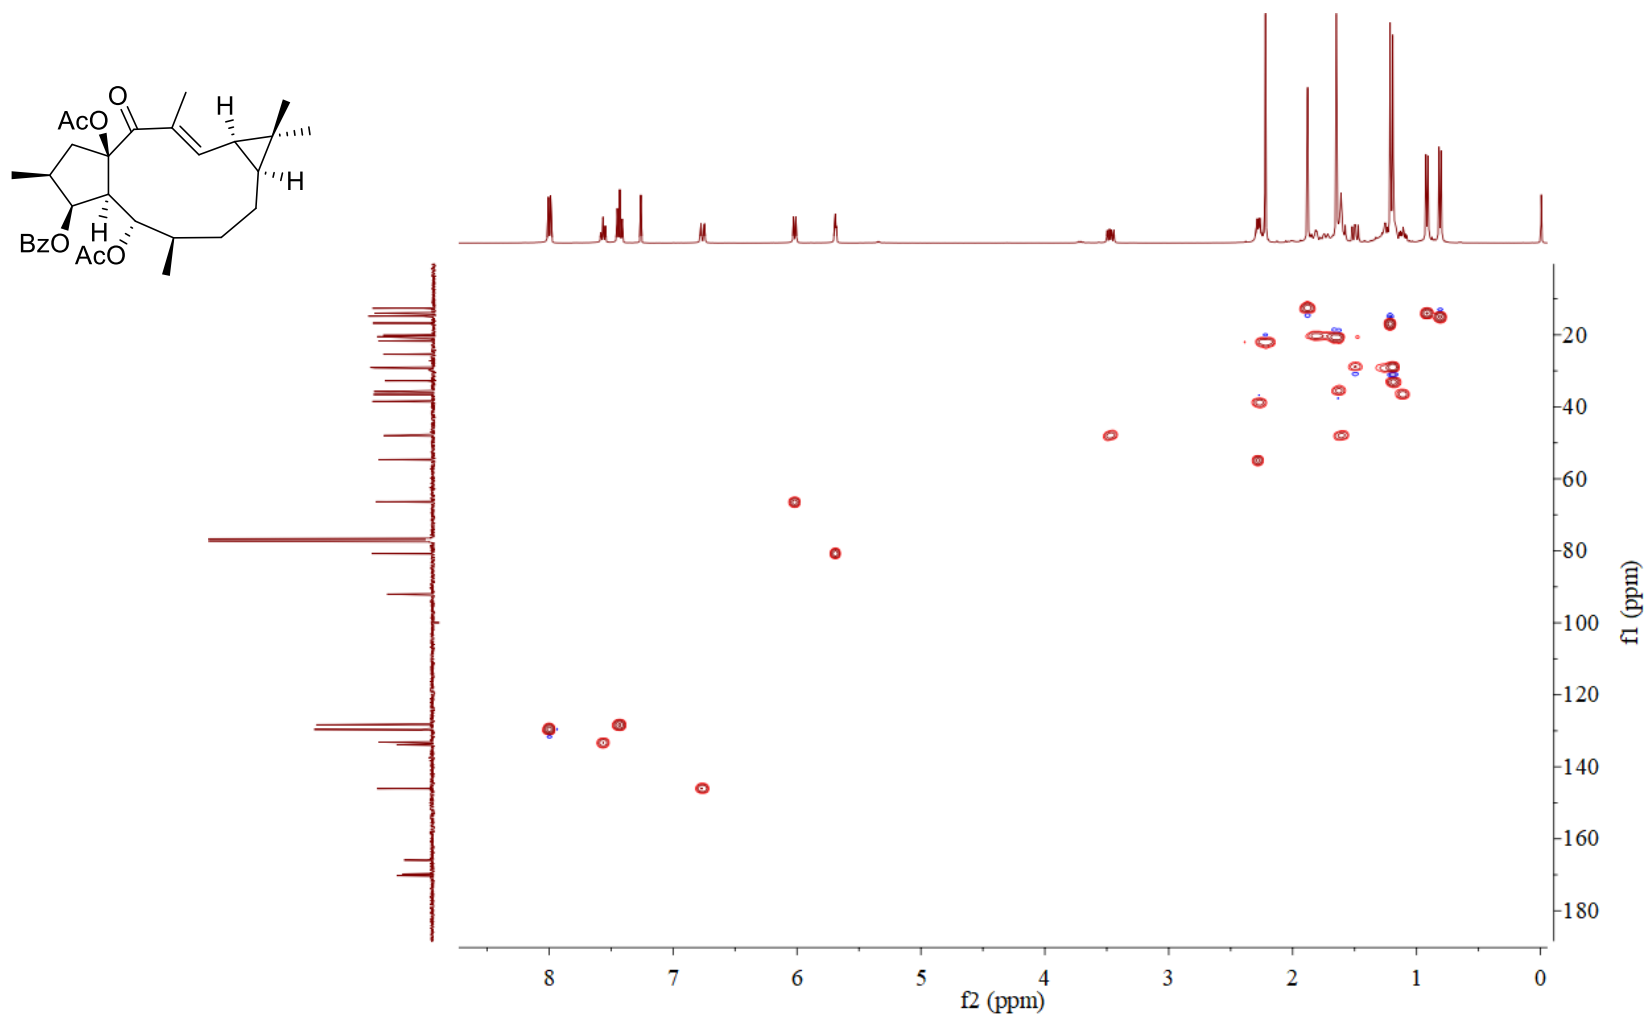

Figure S89. HMBC spectrum of **30** in CDCl<sub>3</sub>.

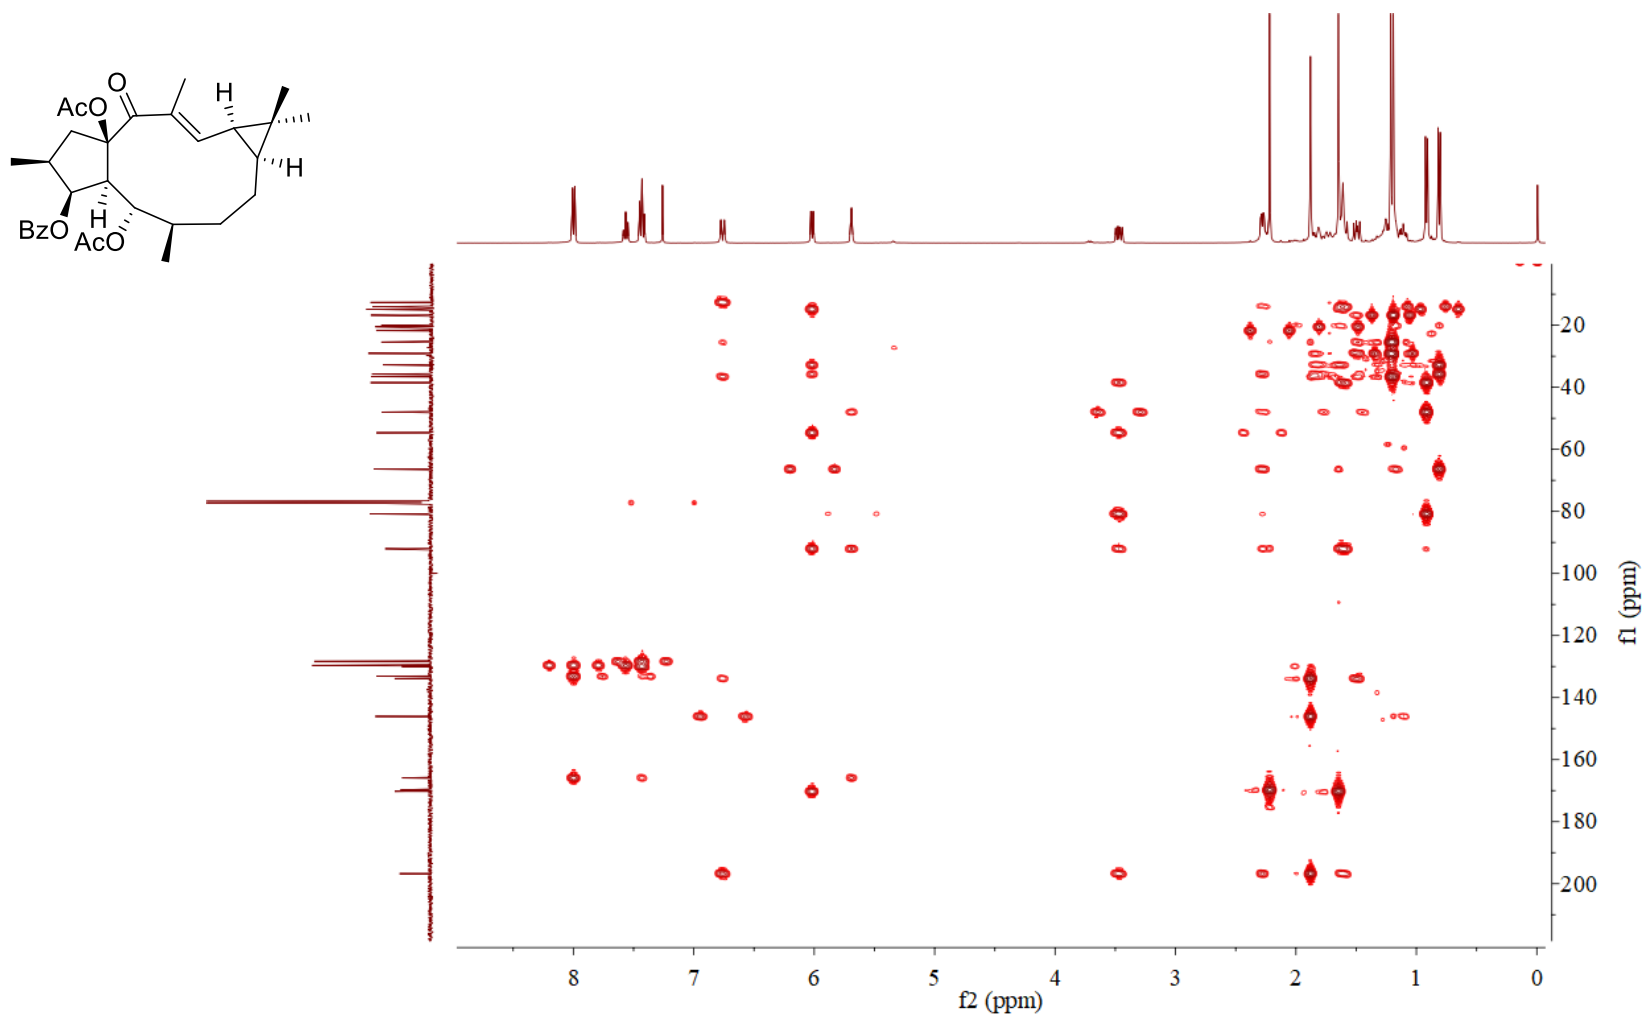

Figure S90.  $^1\text{H}$ - $^1\text{H}$  COSY spectrum of **30** in  $\text{CDCl}_3$ .

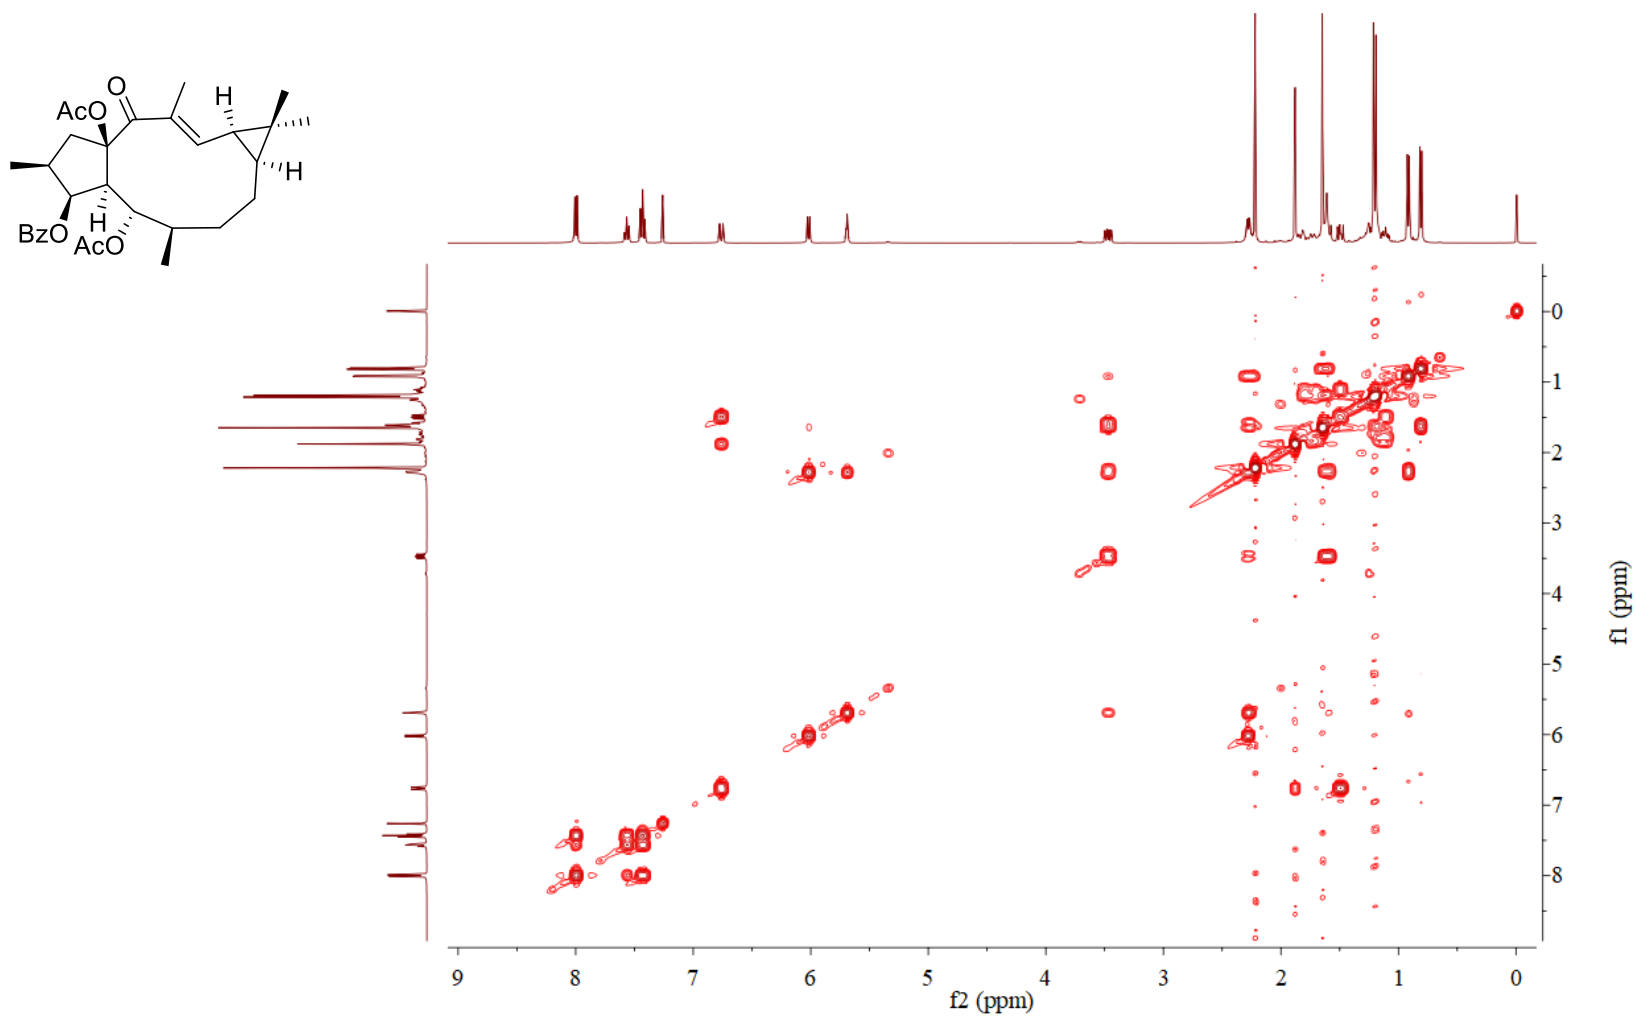

Figure S91. NOESY spectrum of **30** in CDCl<sub>3</sub>.

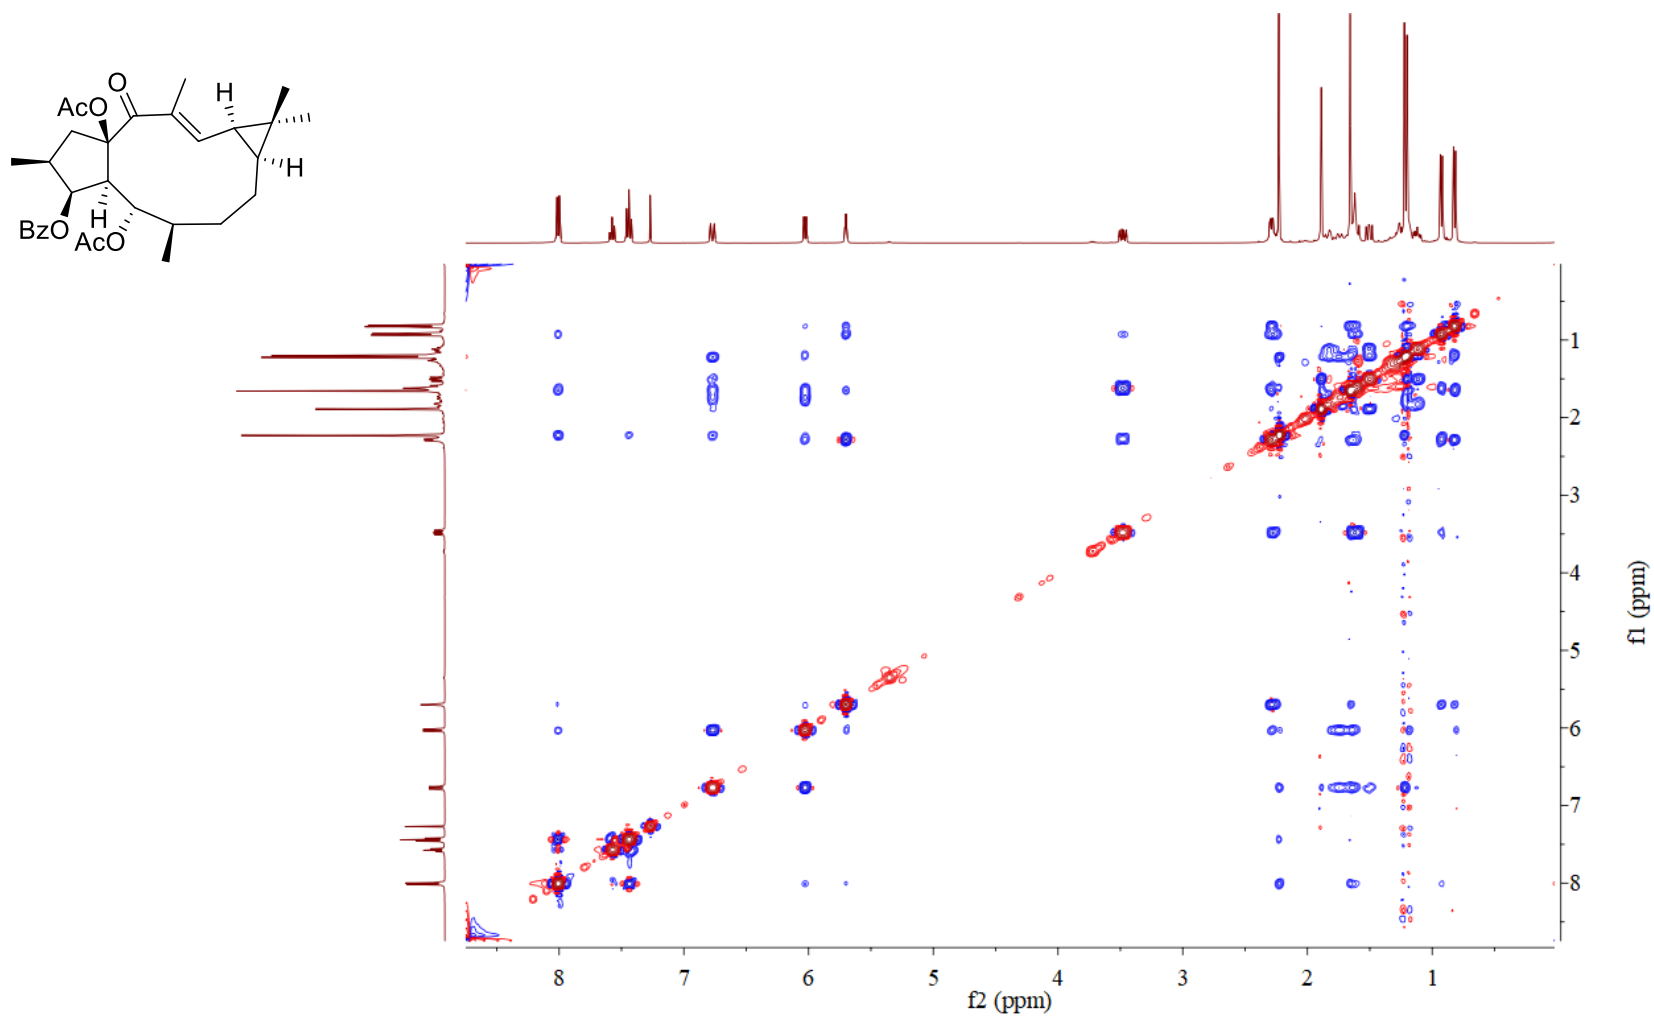

Figure S92.  $^1\text{H}$  NMR spectrum of **31** in  $\text{CDCl}_3$ .

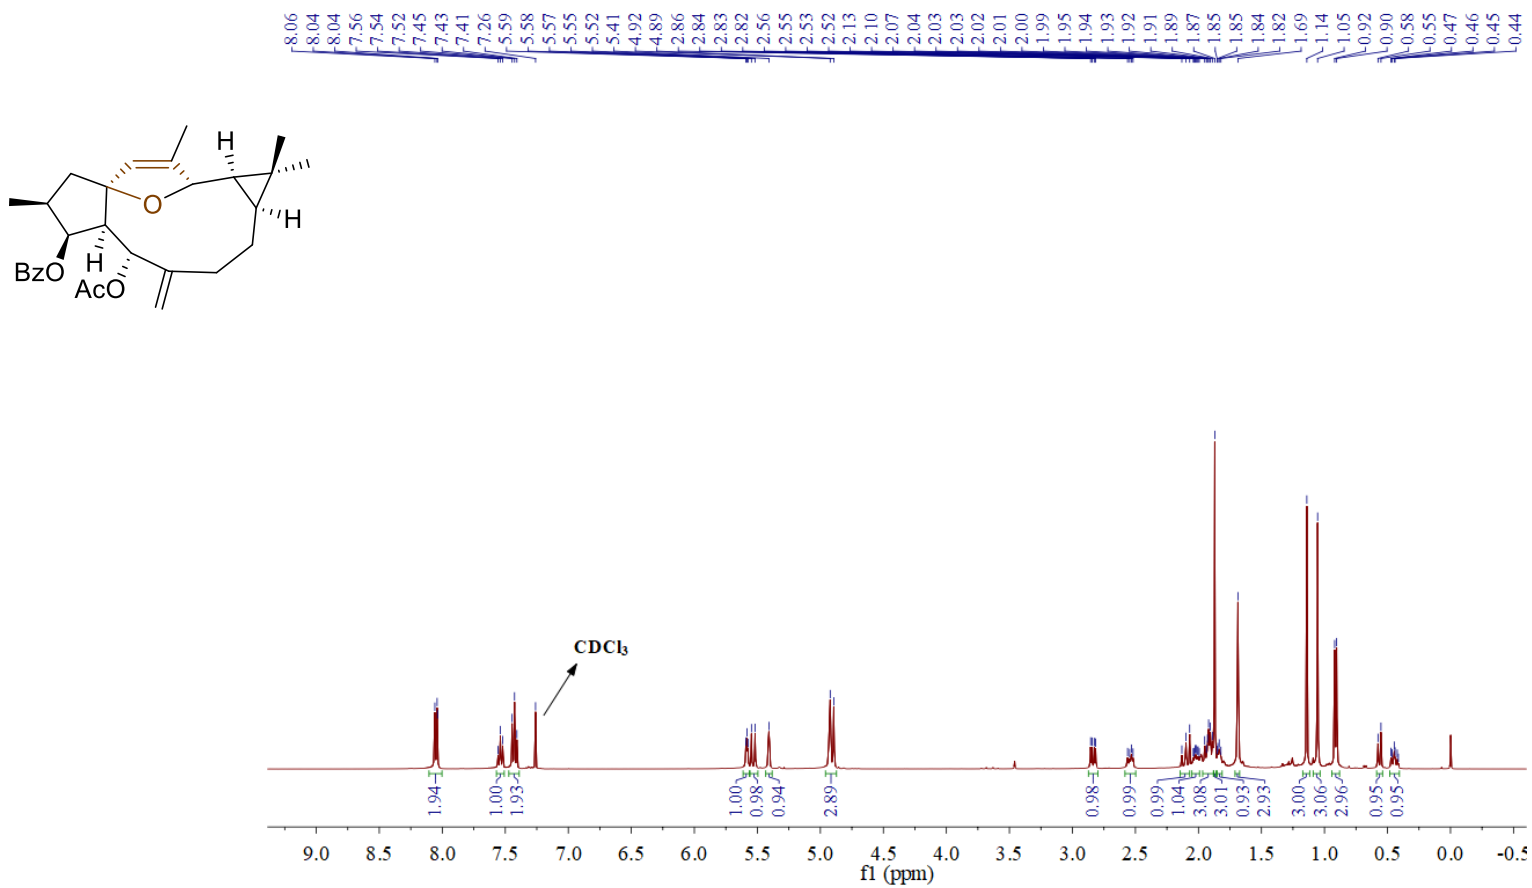

Figure S93.  $^{13}\text{C}$  NMR and DEPT 135 spectra of **31** in  $\text{CDCl}_3$ .

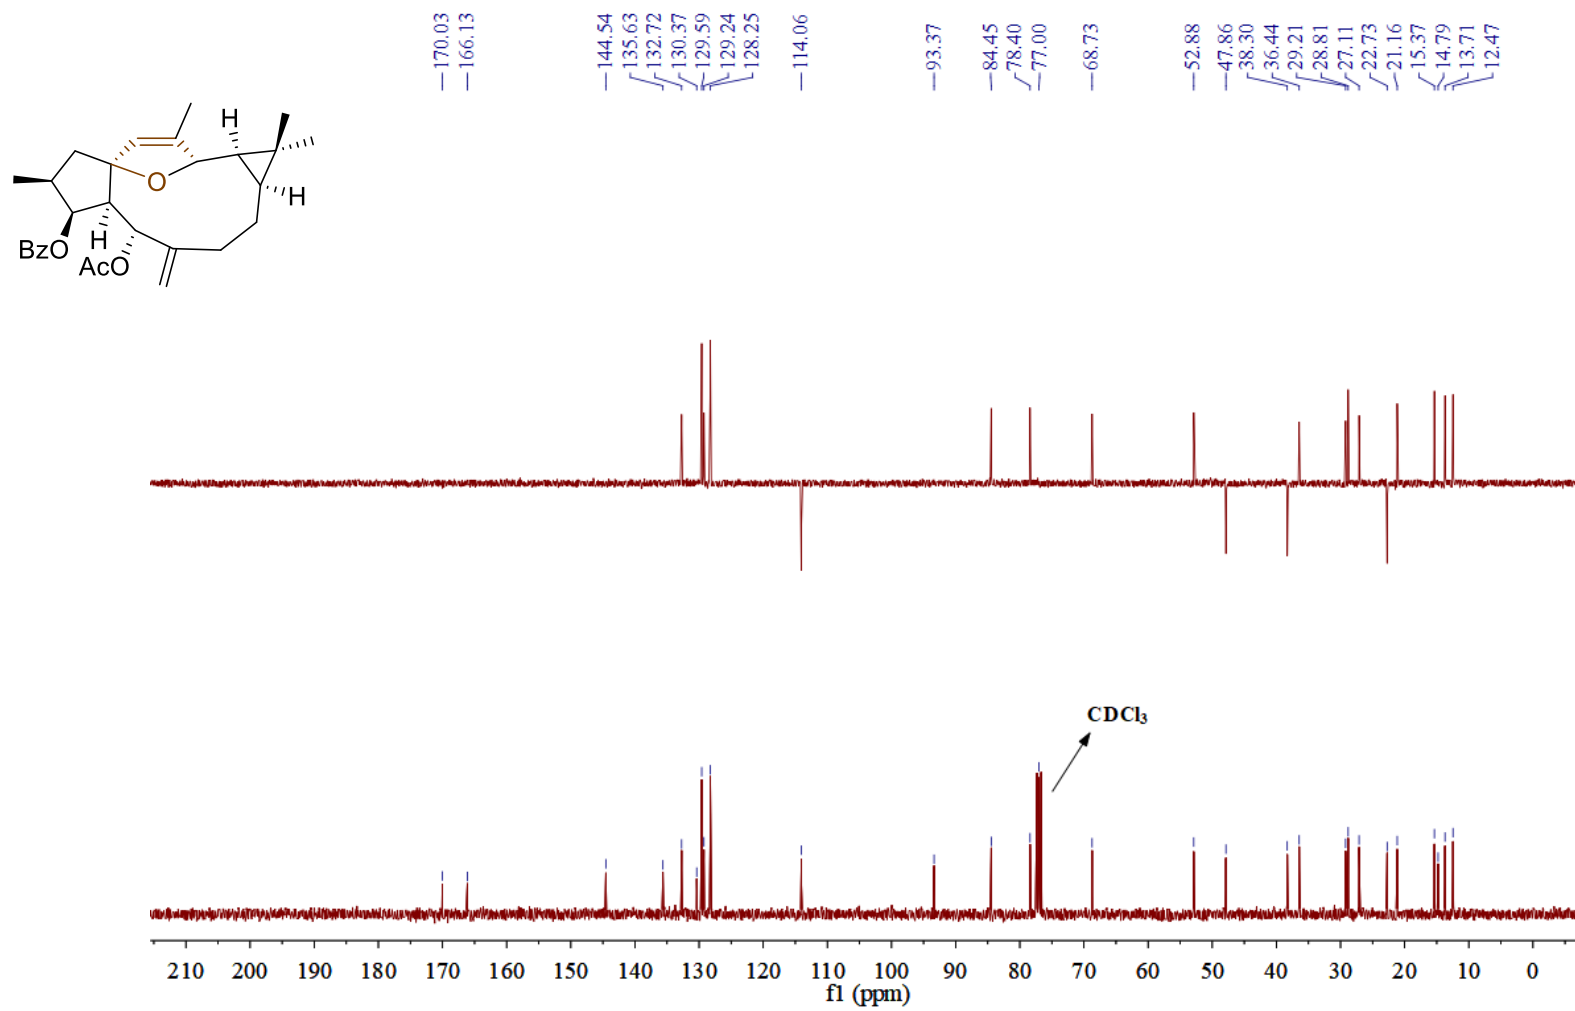

Figure S94. HSQC spectrum of **31** in CDCl<sub>3</sub>.

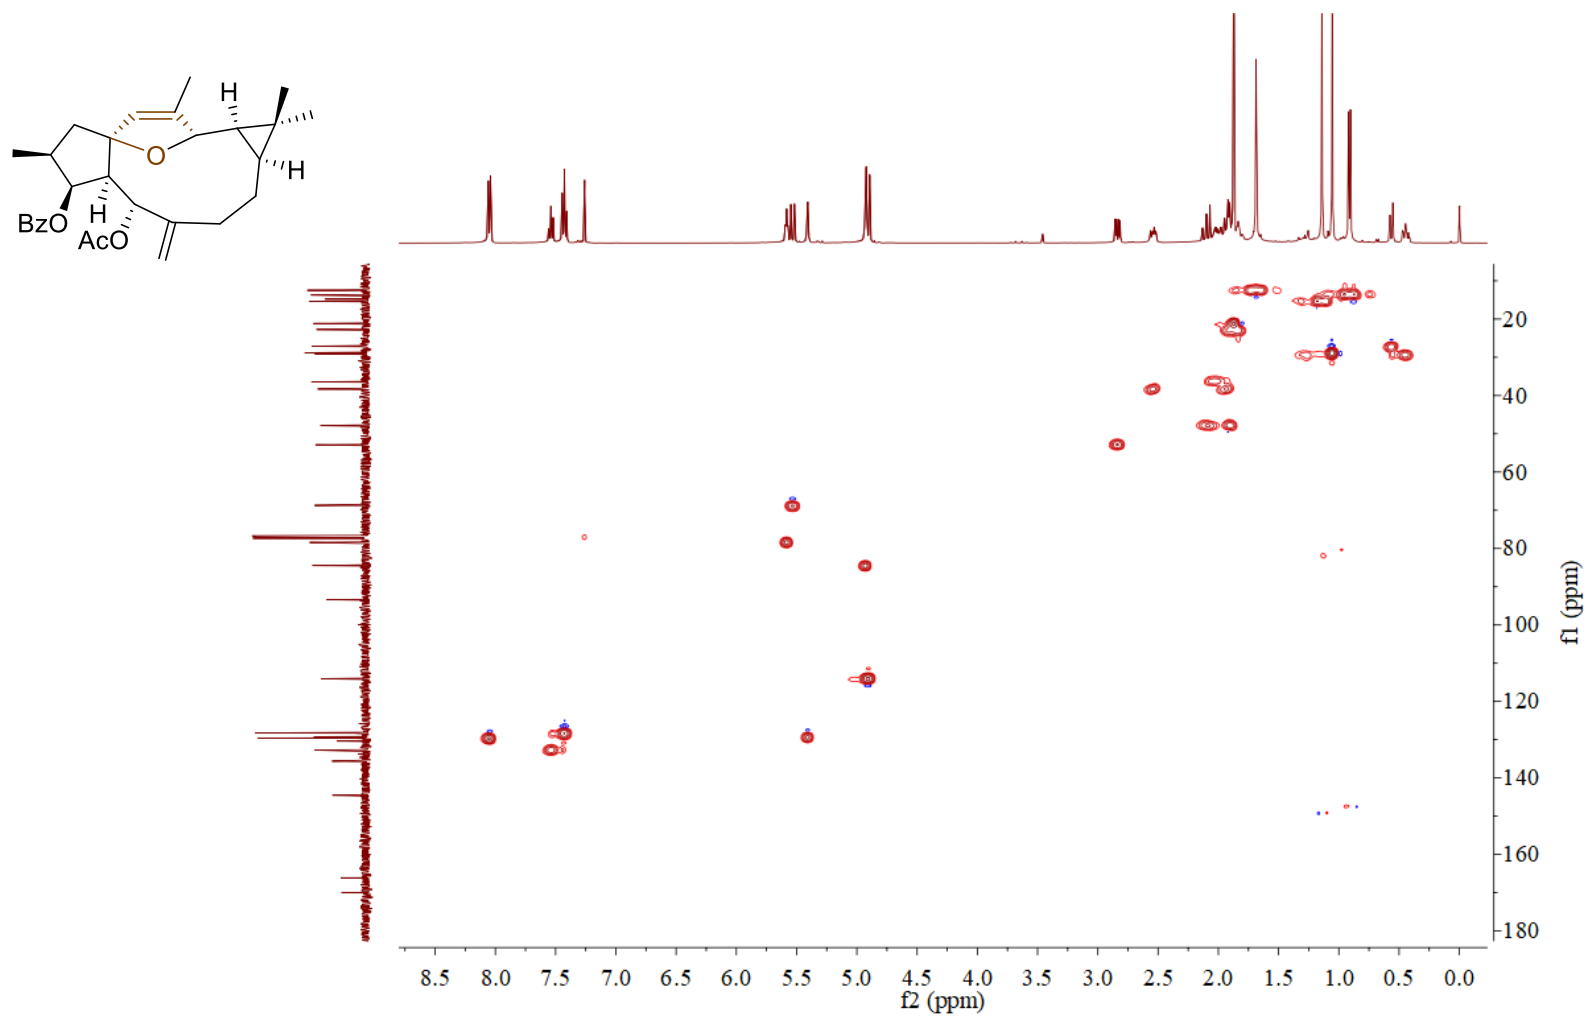



Figure S95. HMBC spectrum of **31** in CDCl<sub>3</sub>.

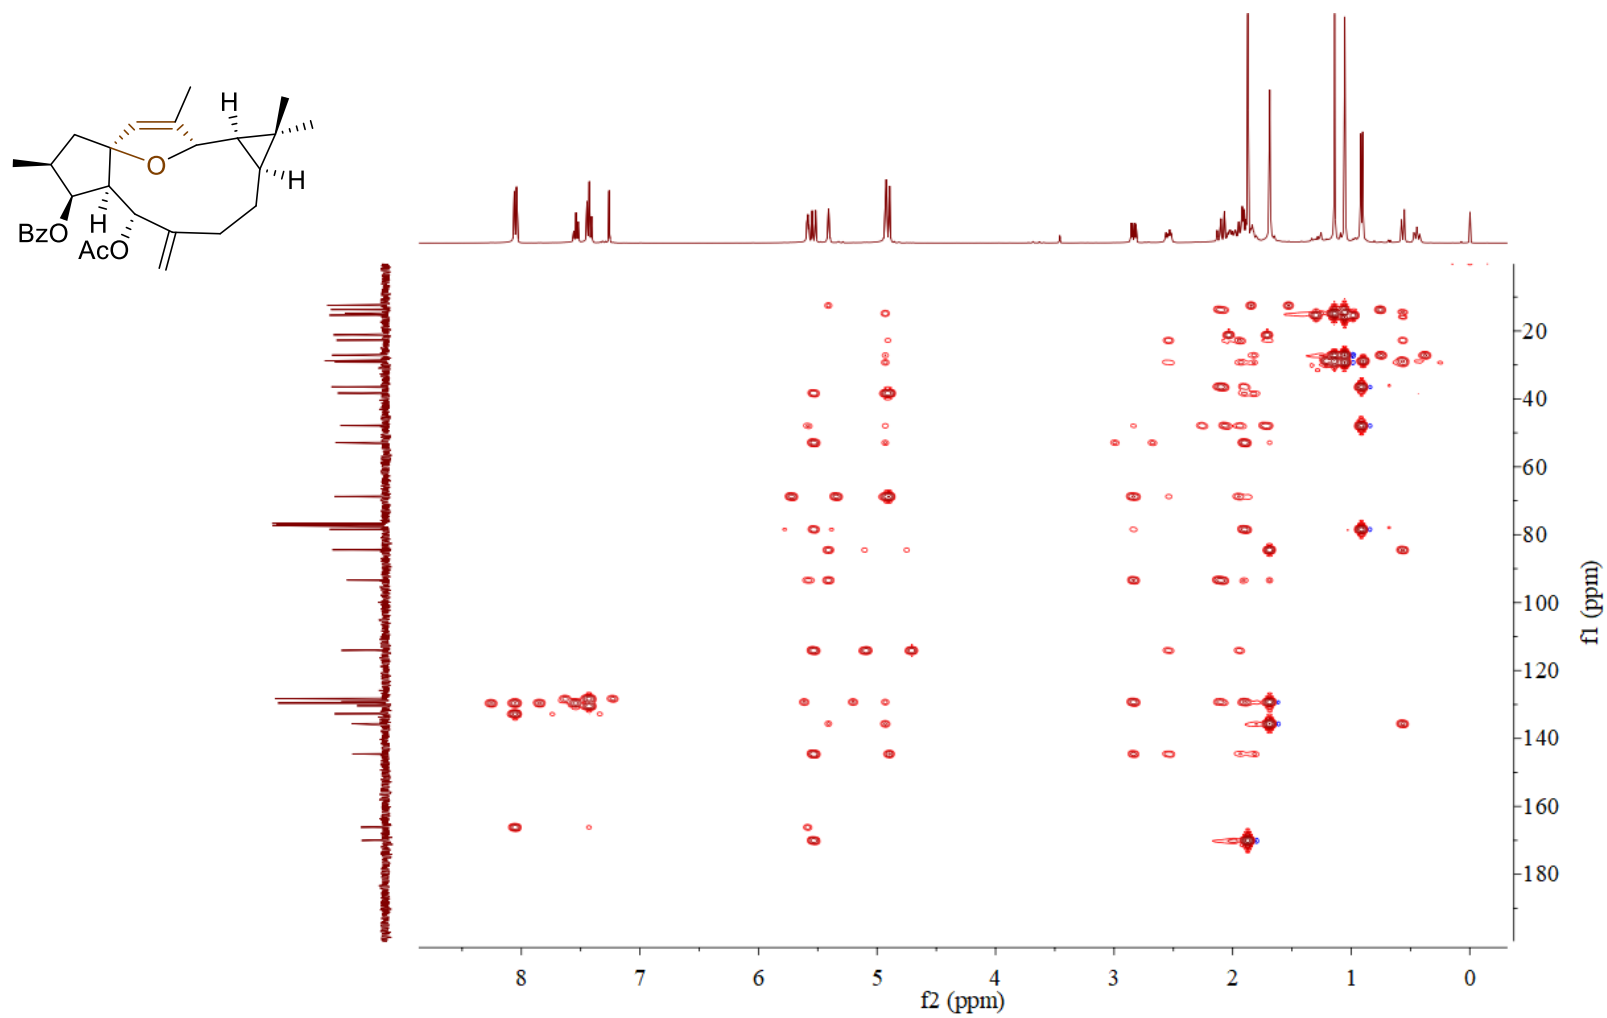

Figure S96.  $^1\text{H}$ - $^1\text{H}$  COSY spectrum of **31** in  $\text{CDCl}_3$ .

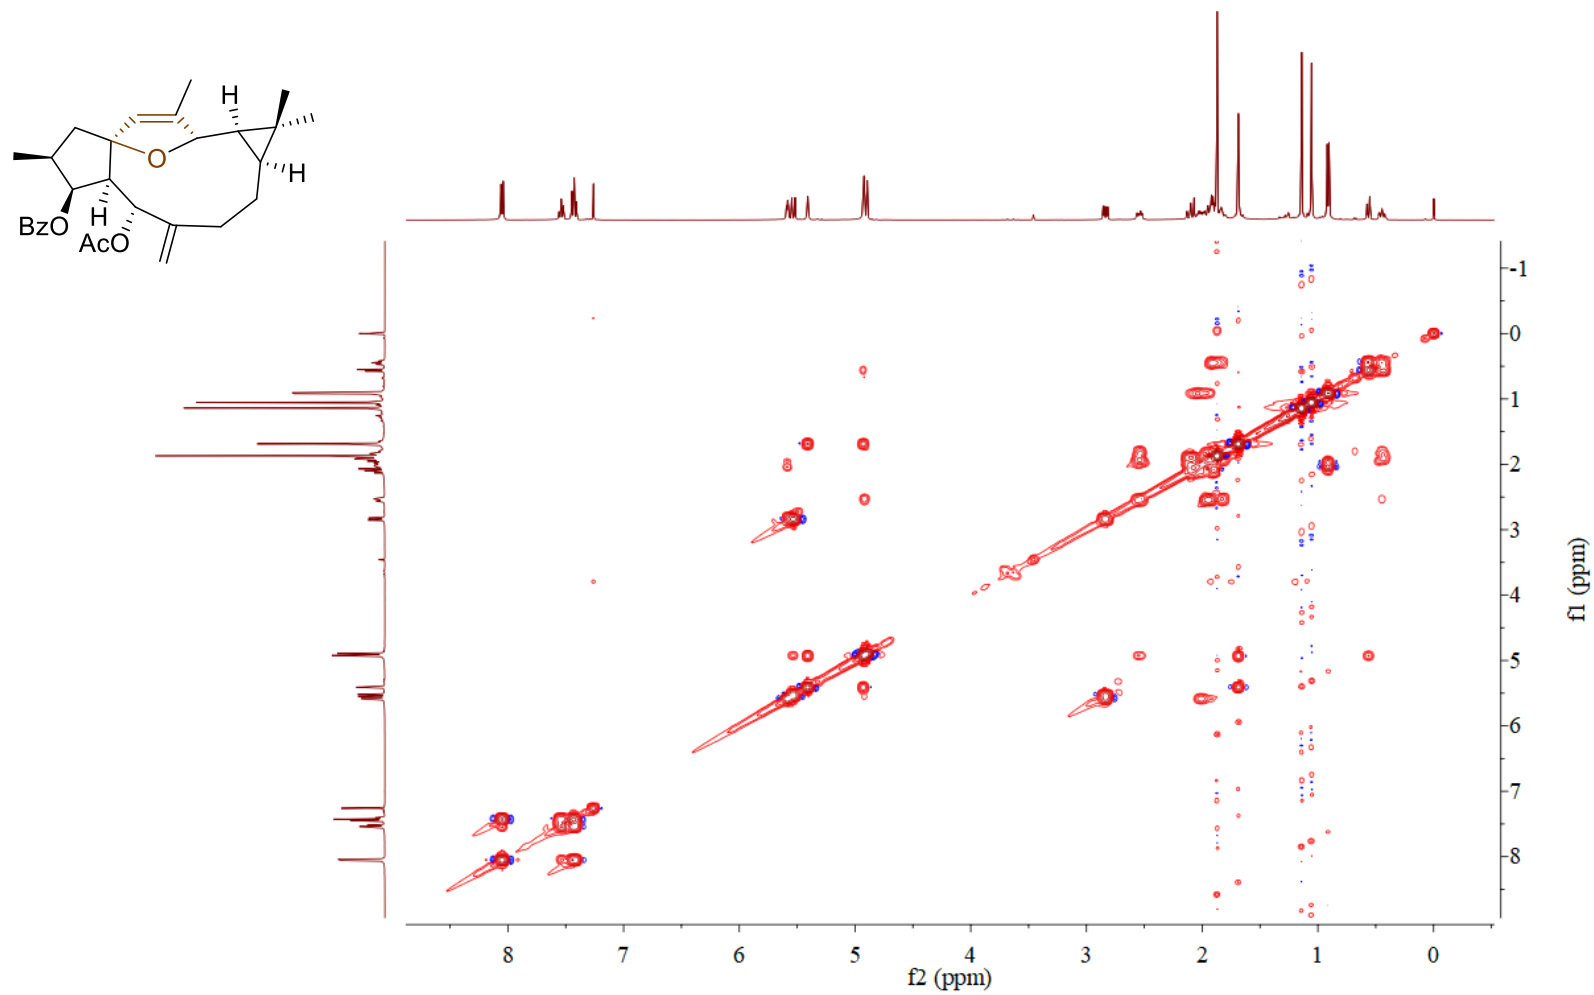

Figure S97. NOESY spectrum of **31** in CDCl<sub>3</sub>.

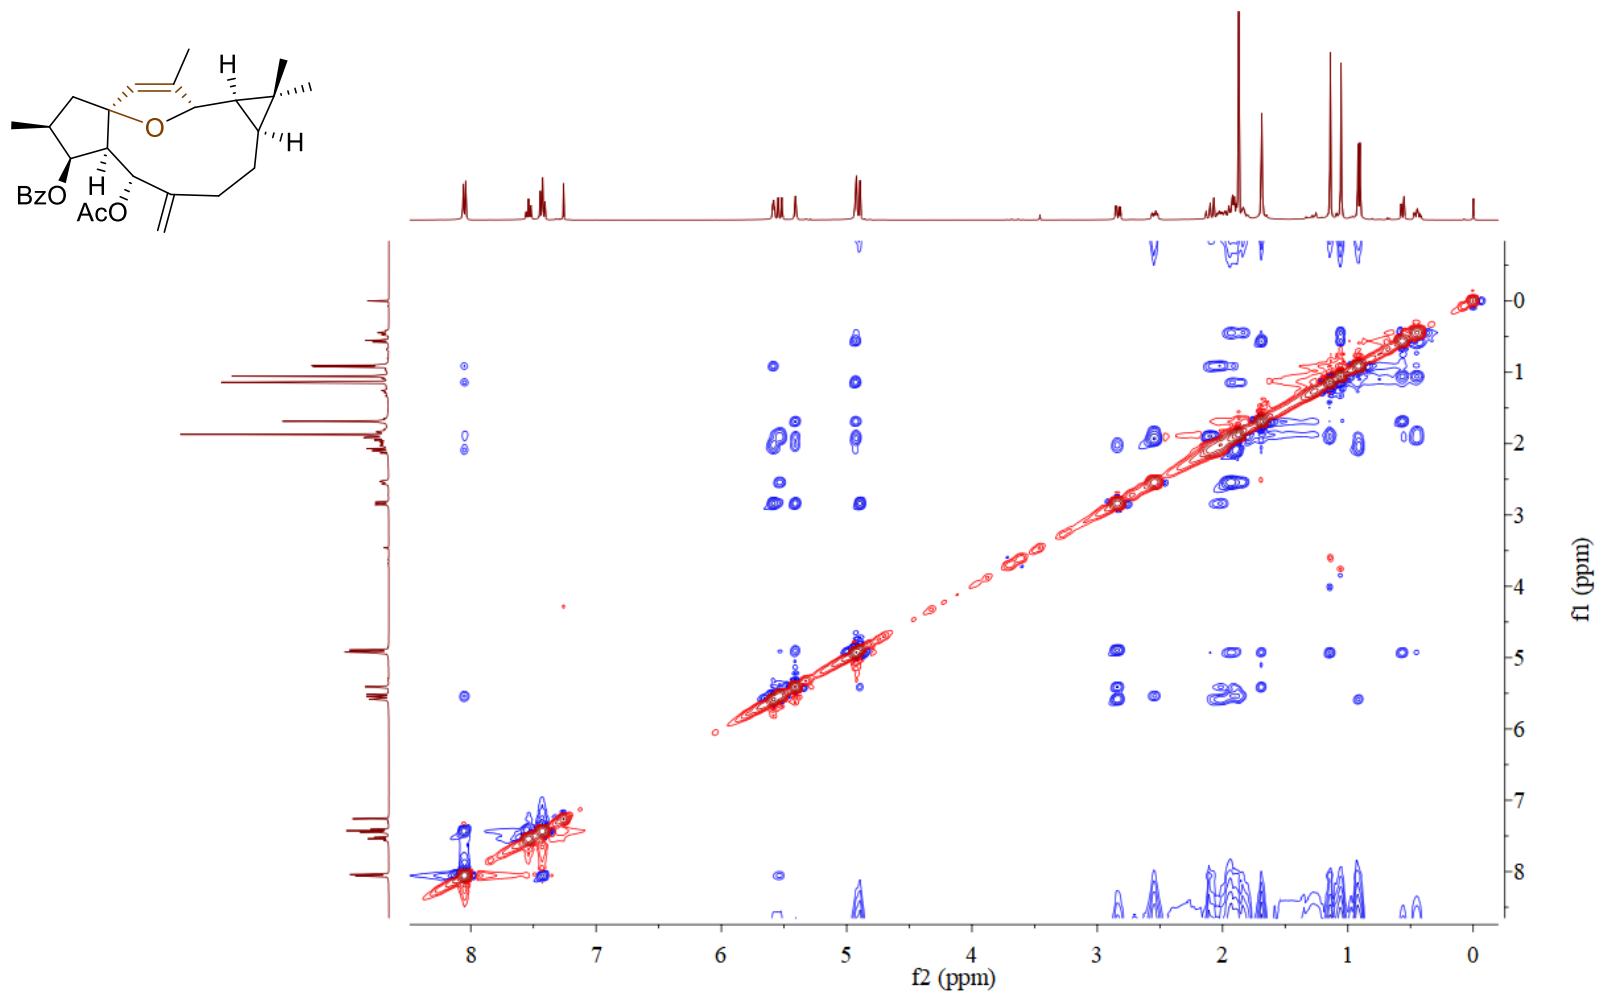

Figure S98.  $^1\text{H}$  NM spectrum of **32** in  $\text{CDCl}_3$ .

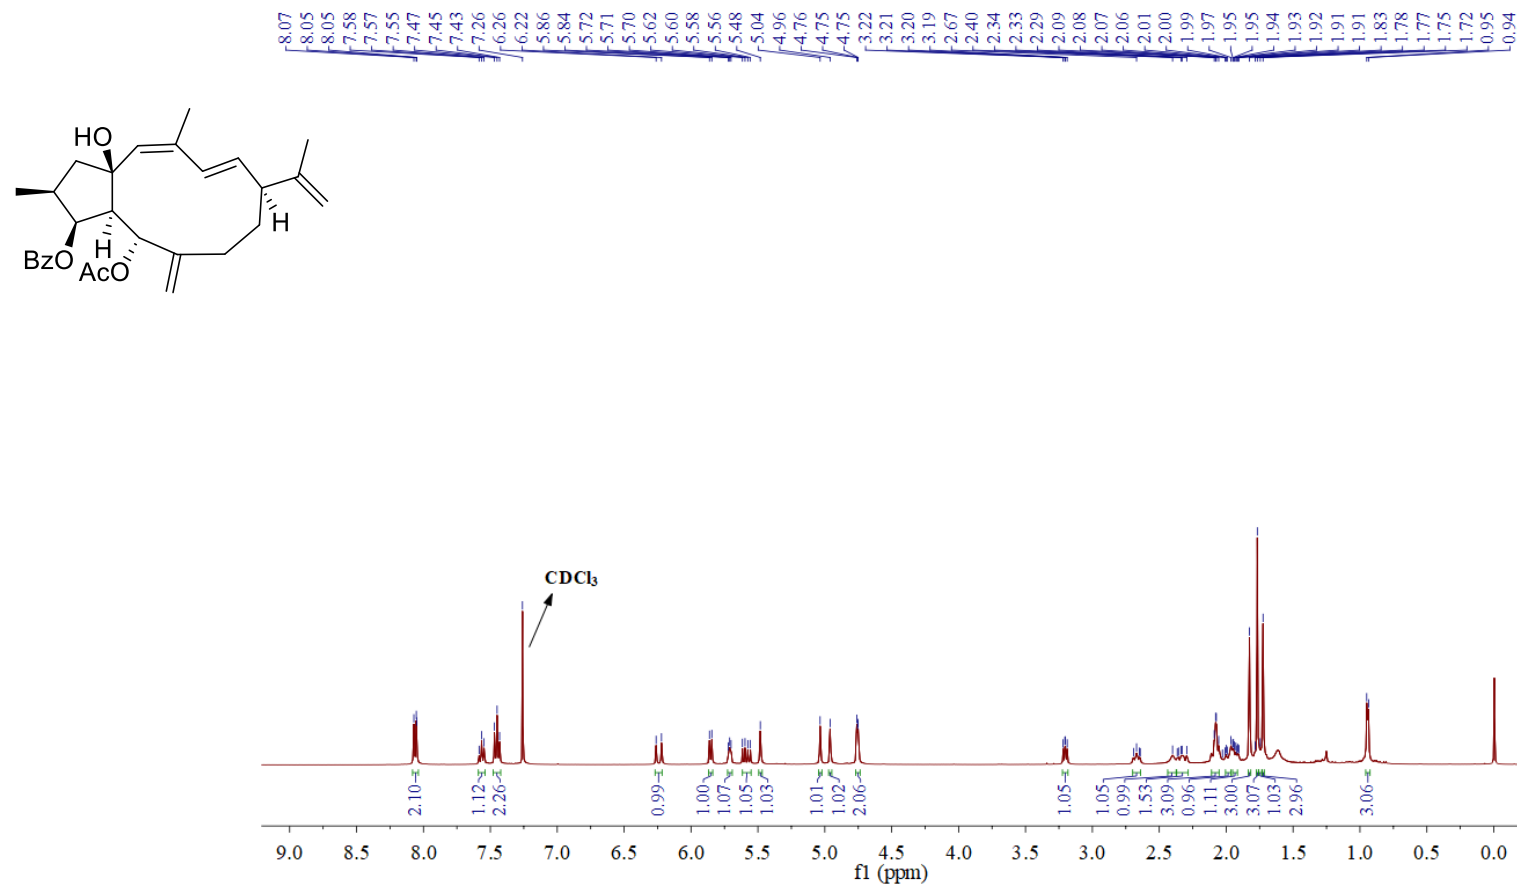

Figure S99.  $^{13}\text{C}$  NMR and DEPT 135 spectra of **32** in  $\text{CDCl}_3$ .

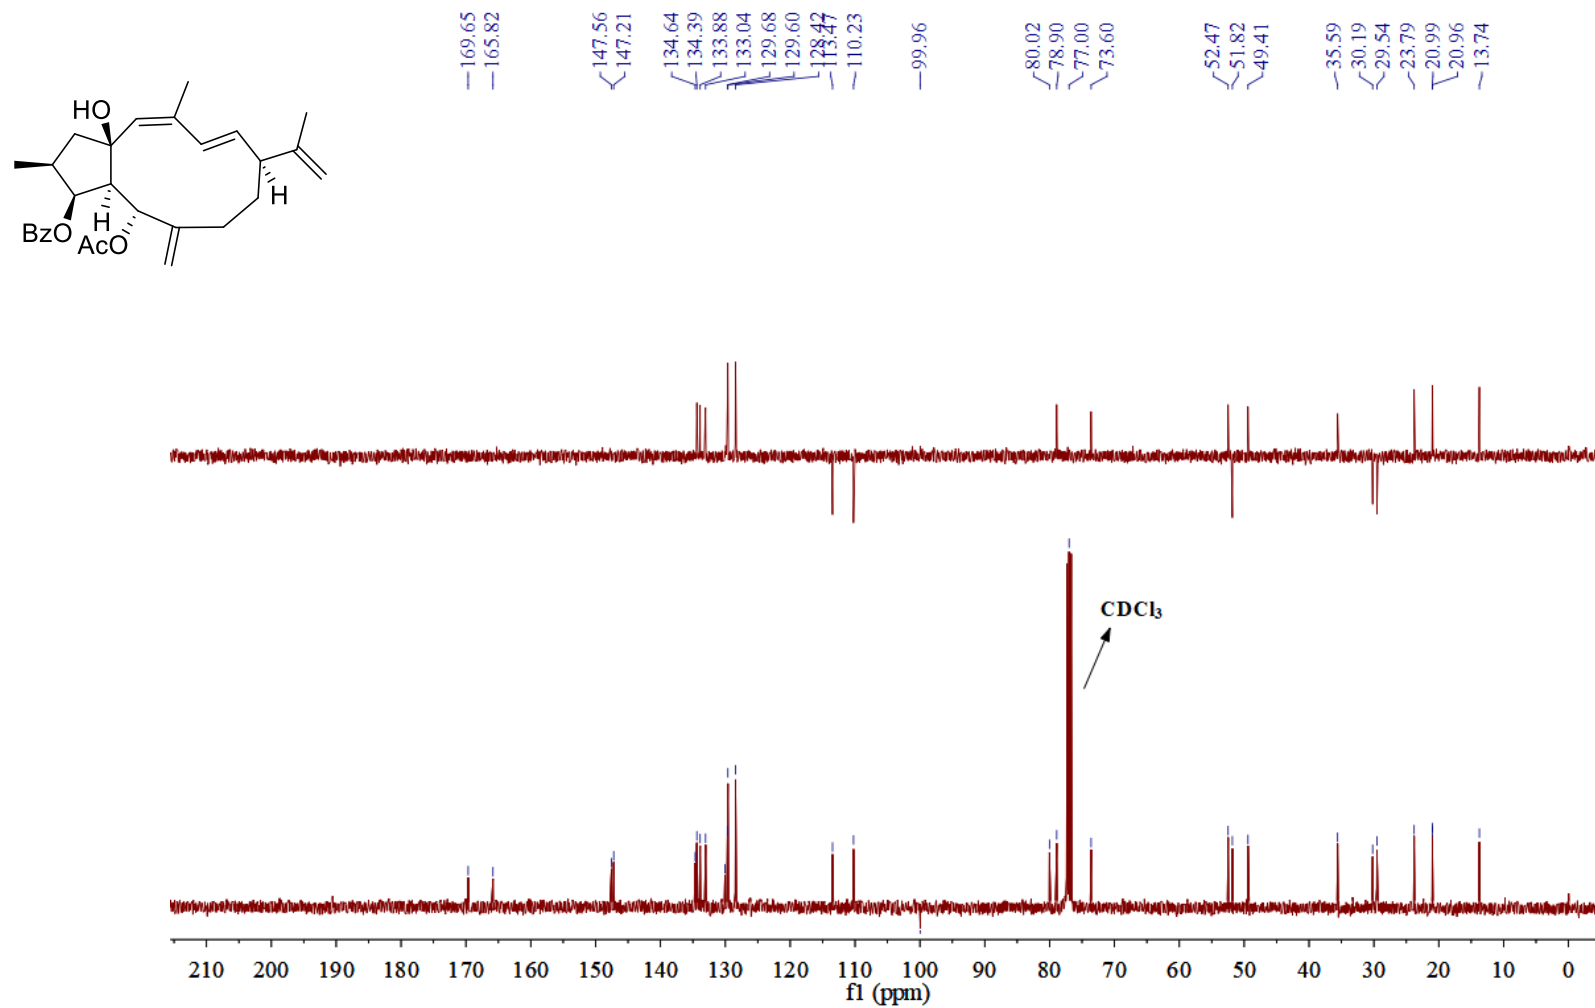

Figure S100. HSQC spectrum of **32** in CDCl<sub>3</sub>.

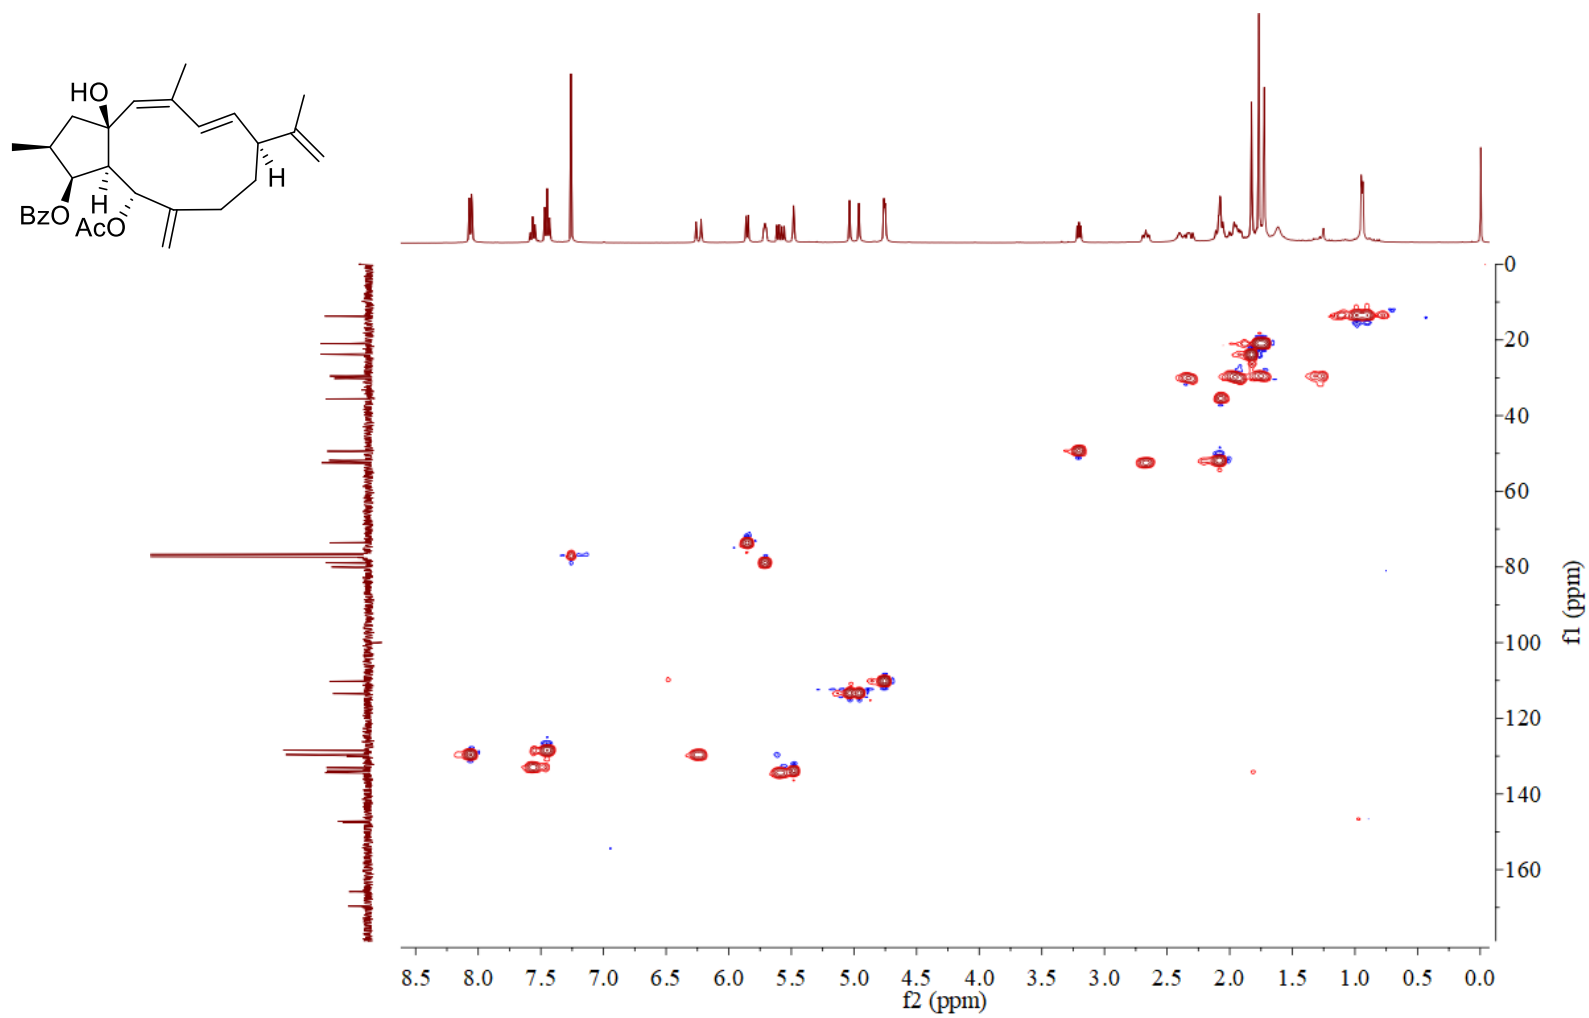

Figure S101. HMBC spectrum of **32** in CDCl<sub>3</sub>.

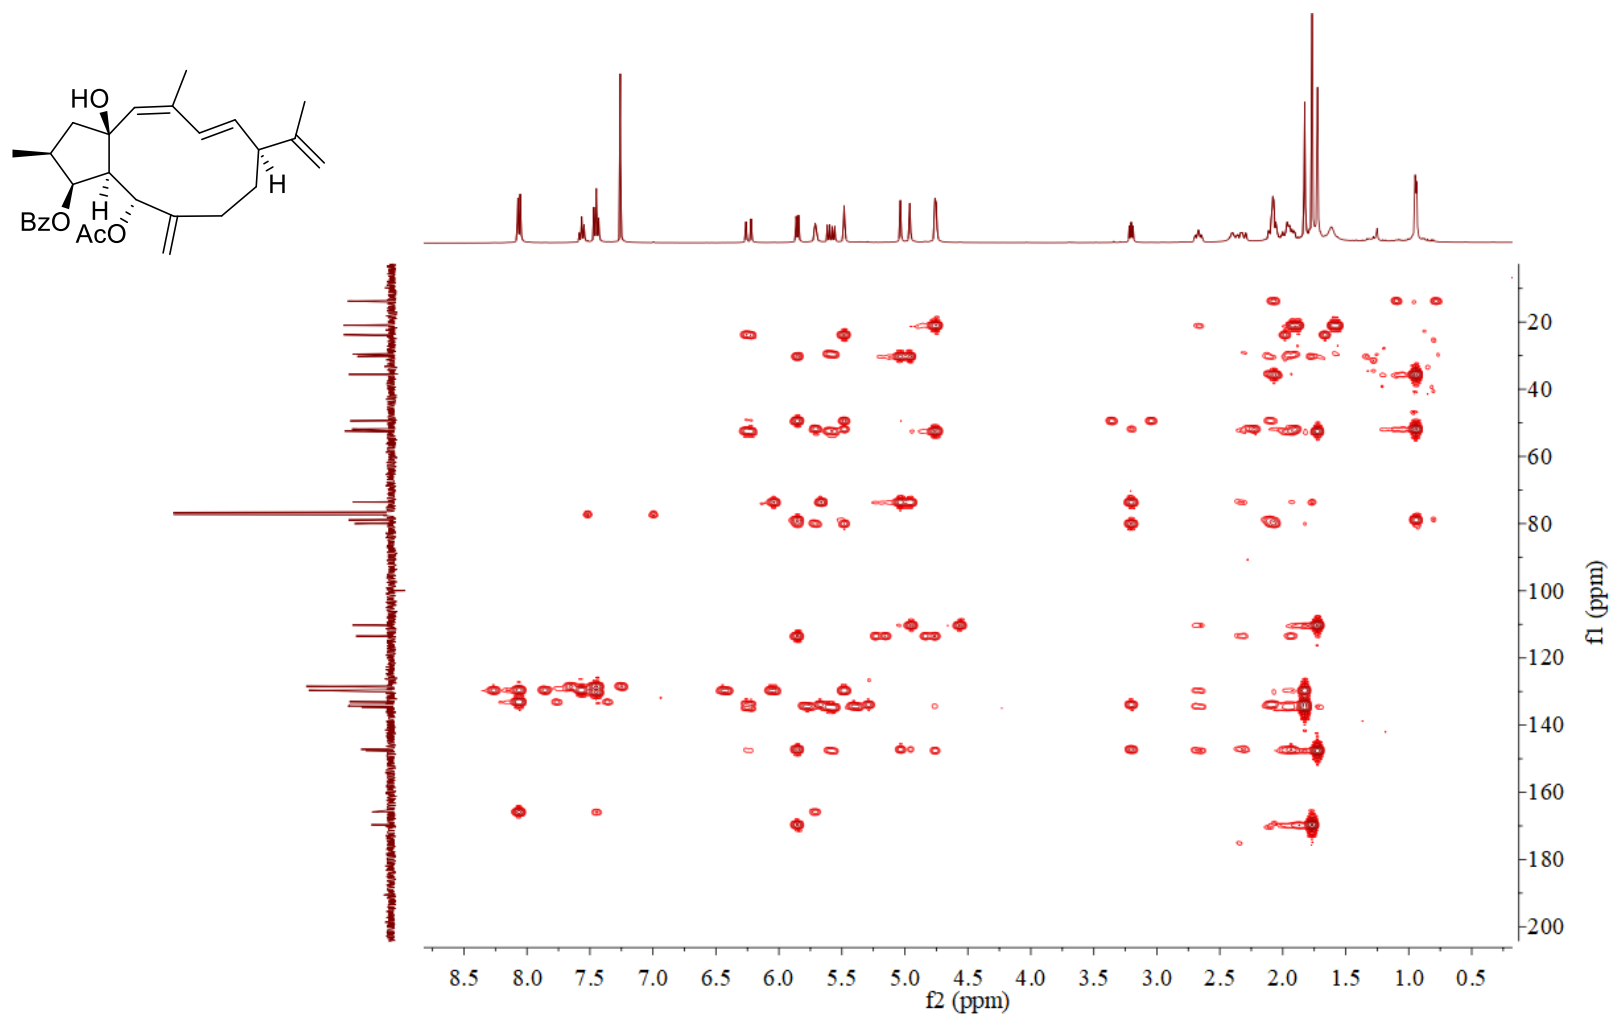

**Figure S102.**  $^1\text{H}$ - $^1\text{H}$  COSY spectrum of **32** in  $\text{CDCl}_3$ .

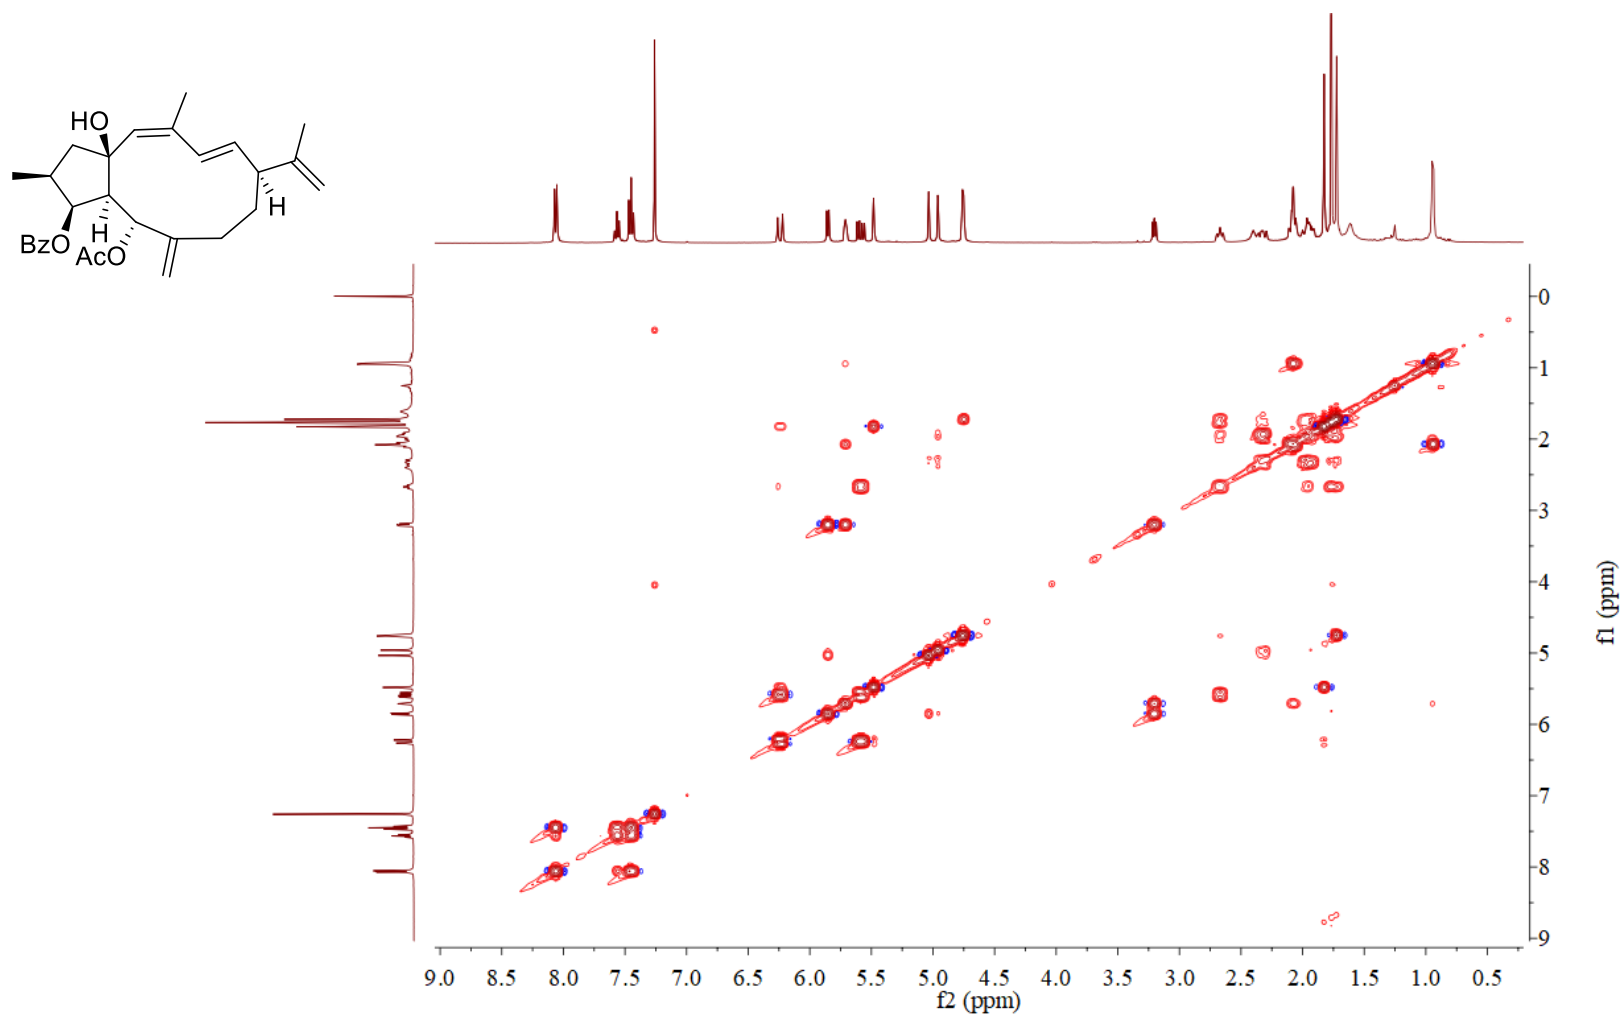



Figure S103. NOESY spectrum of **32** in CDCl<sub>3</sub>.

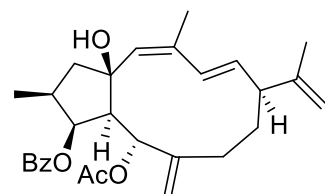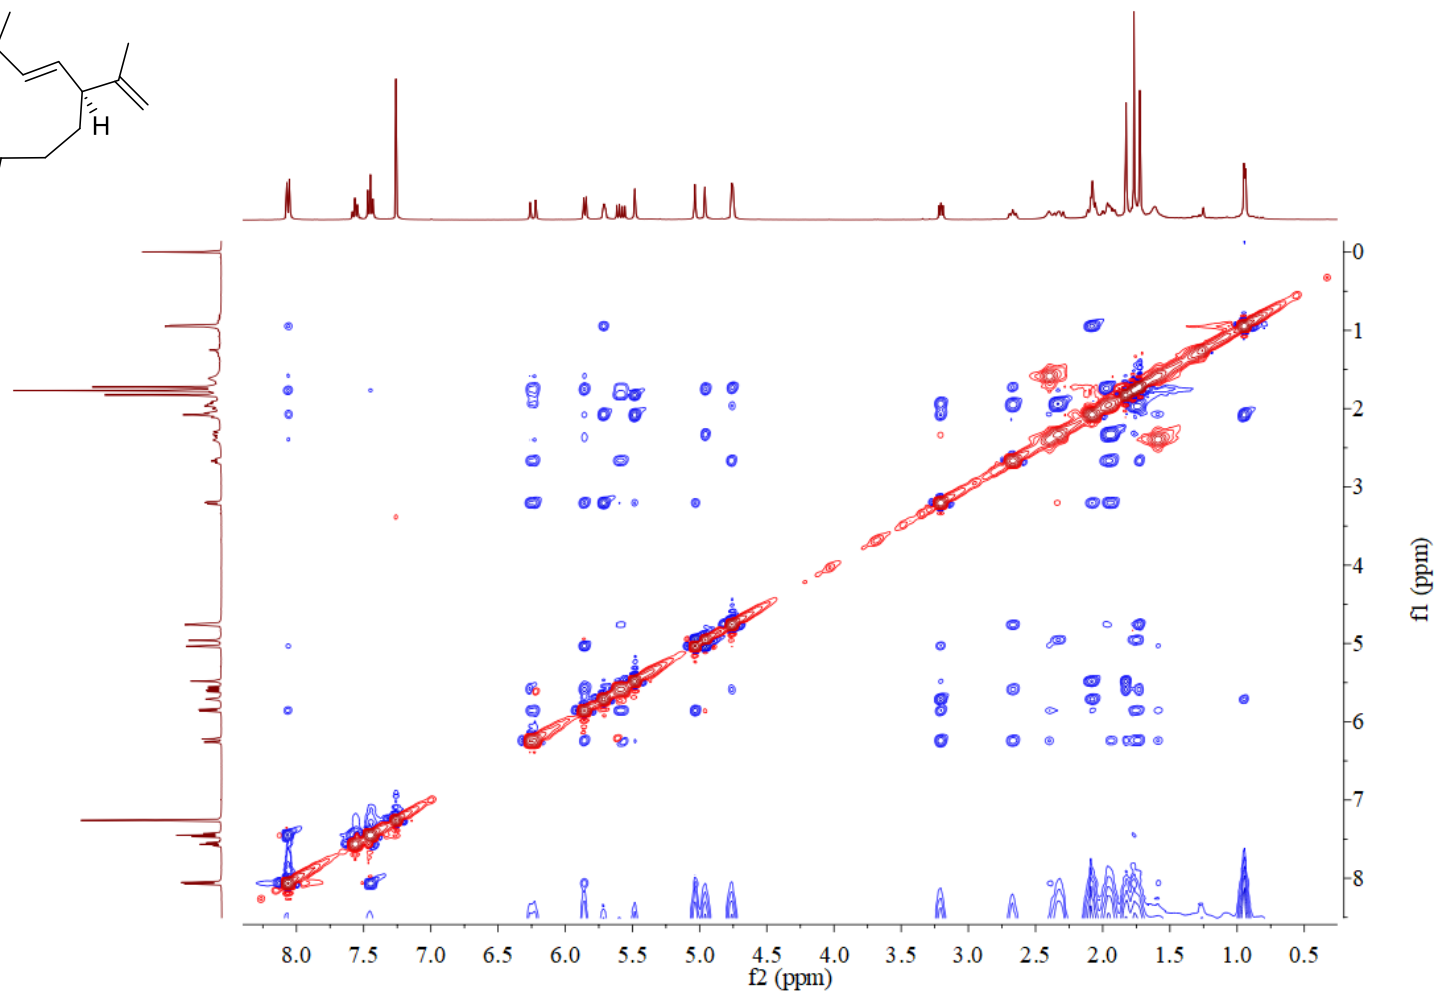

Figure S104. <sup>1</sup>H NMR spectrum of **33** in CDCl<sub>3</sub>.

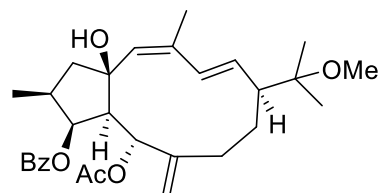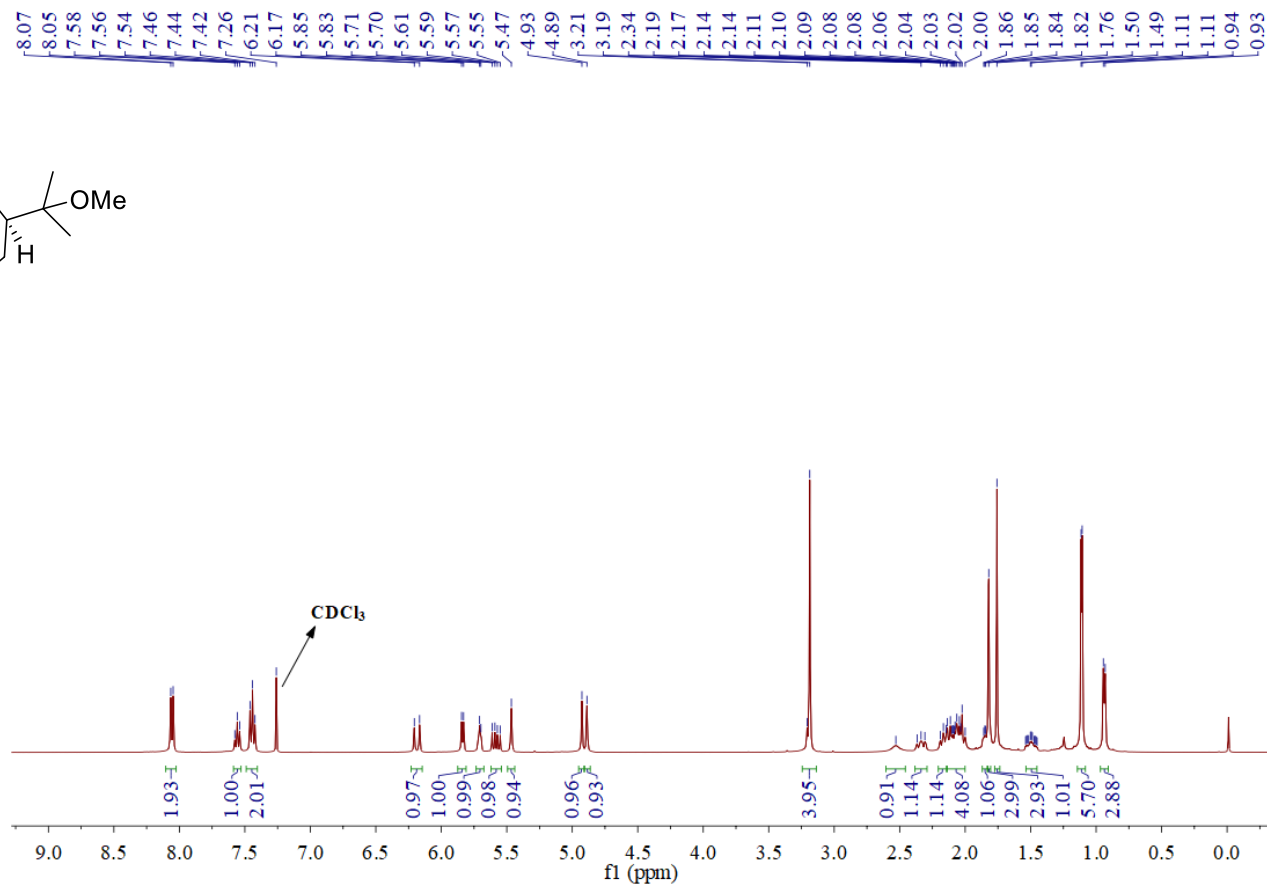

Figure S105.  $^{13}\text{C}$  NMR and DEPT 135 spectra of **33** in  $\text{CDCl}_3$ .

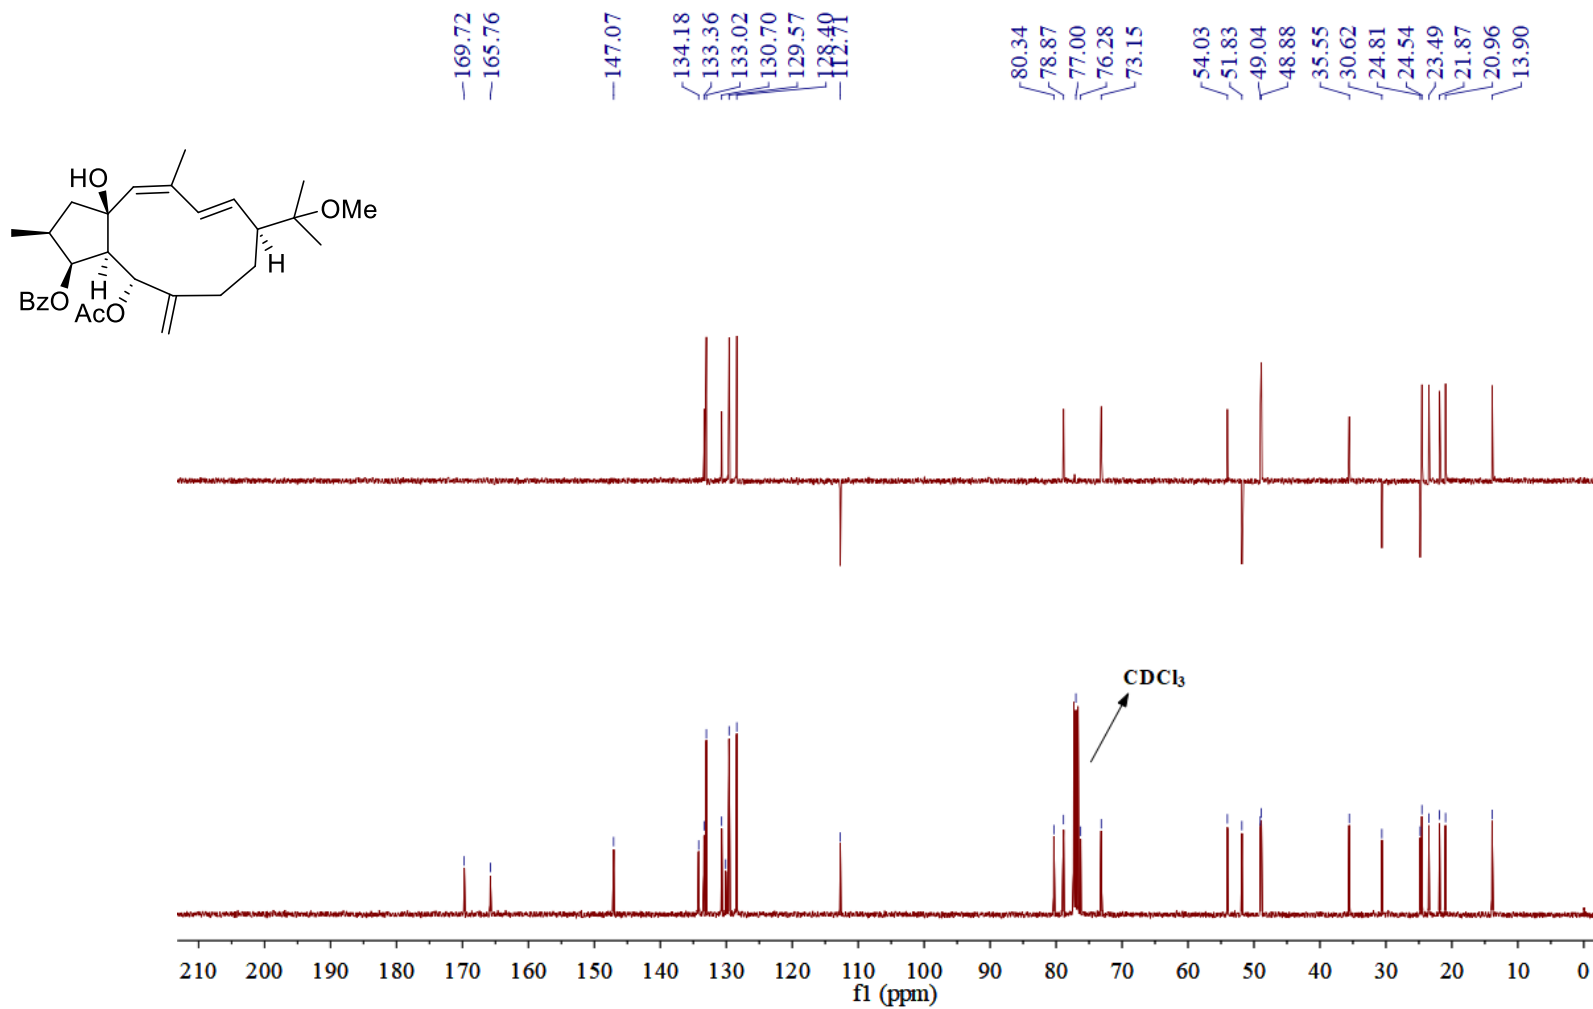

Figure S106. HSQC spectrum of **33** in CDCl<sub>3</sub>.

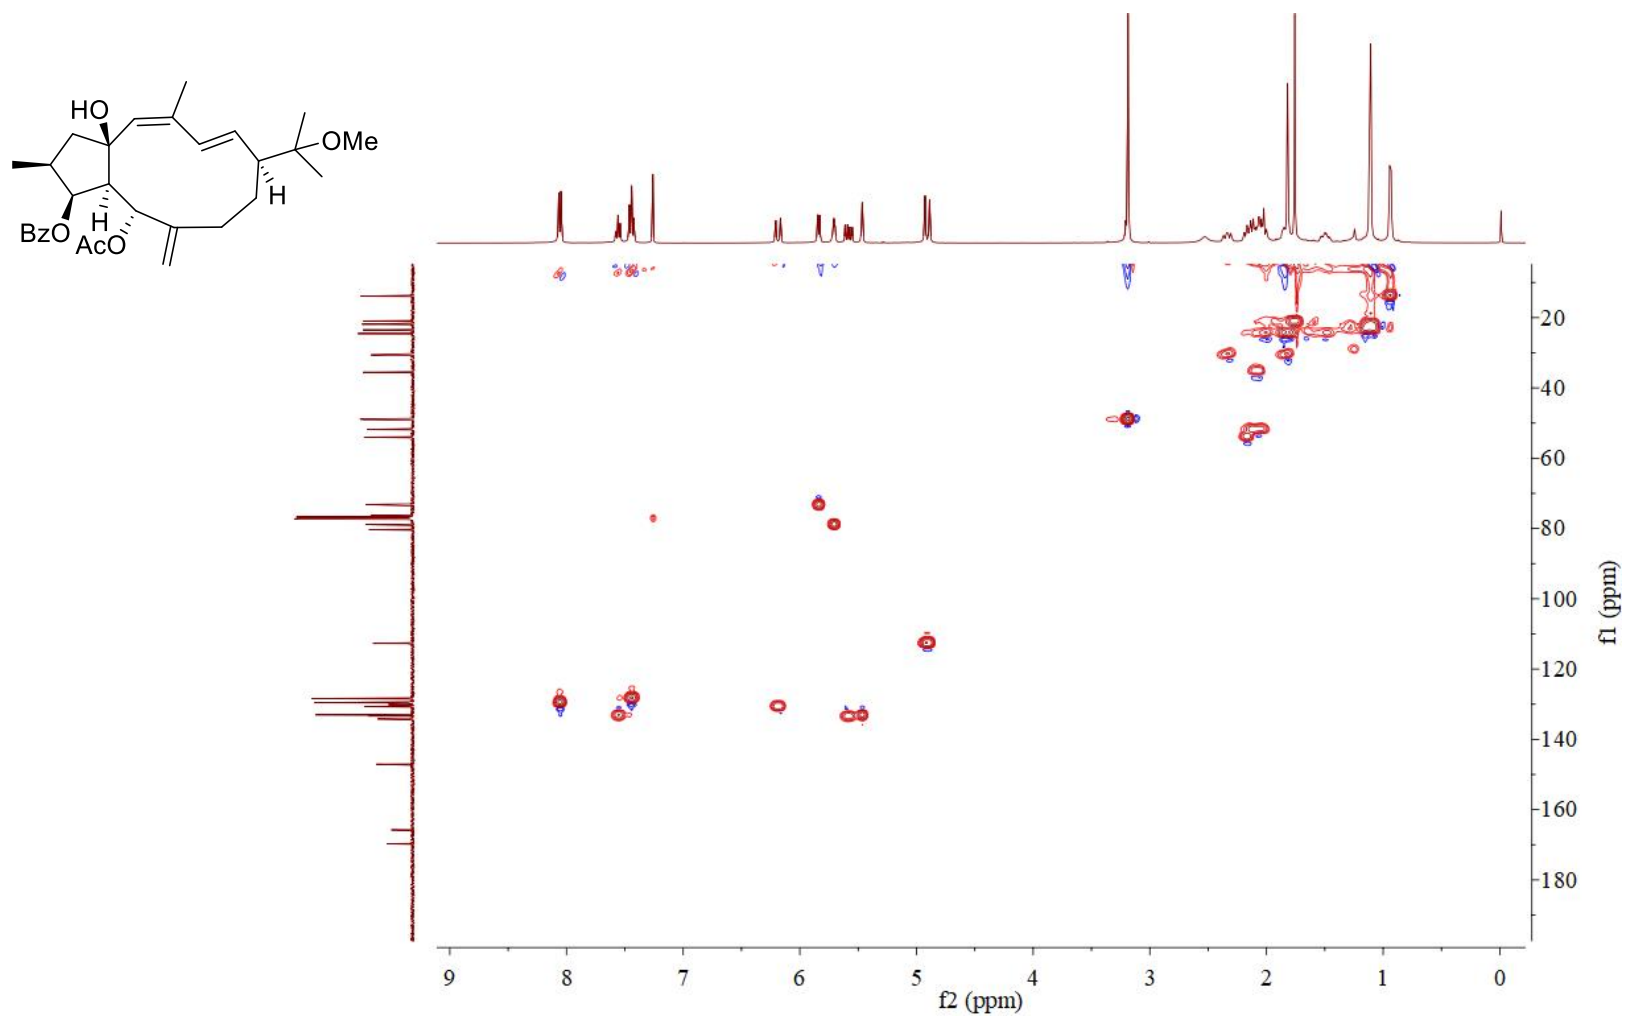

Figure S107. HMBC spectrum of **33** in CDCl<sub>3</sub>.

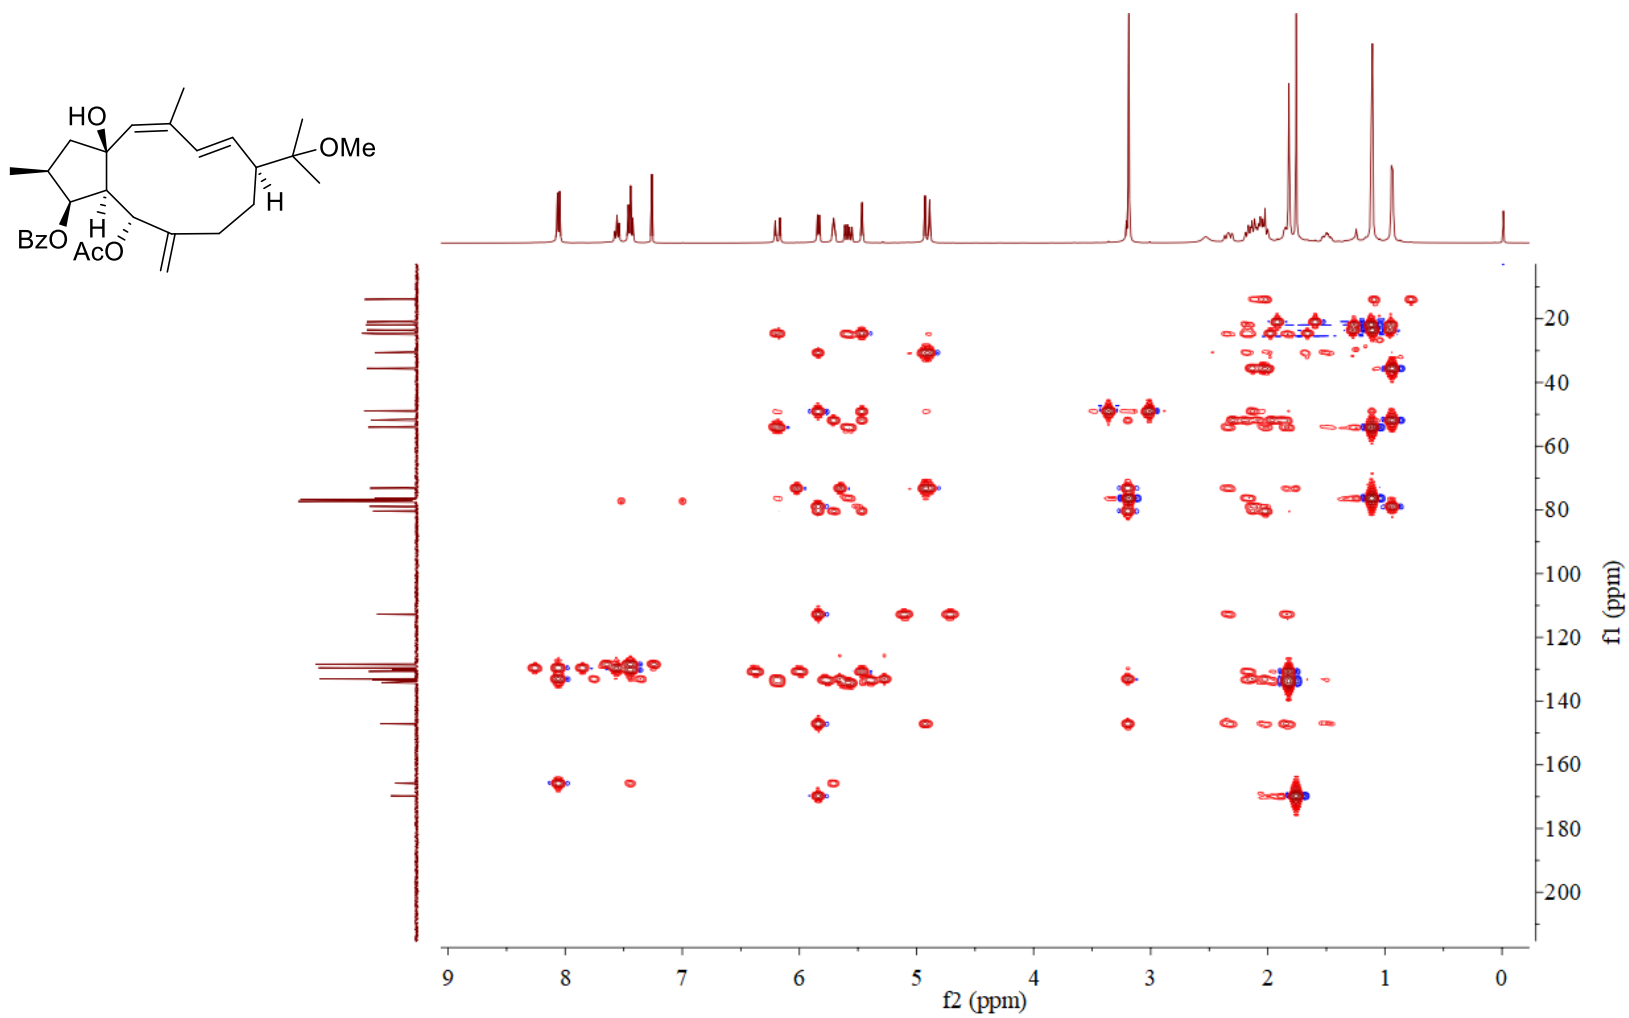

**Figure S108.**  $^1\text{H}$ - $^1\text{H}$  NMR spectrum of **33** in  $\text{CDCl}_3$ .

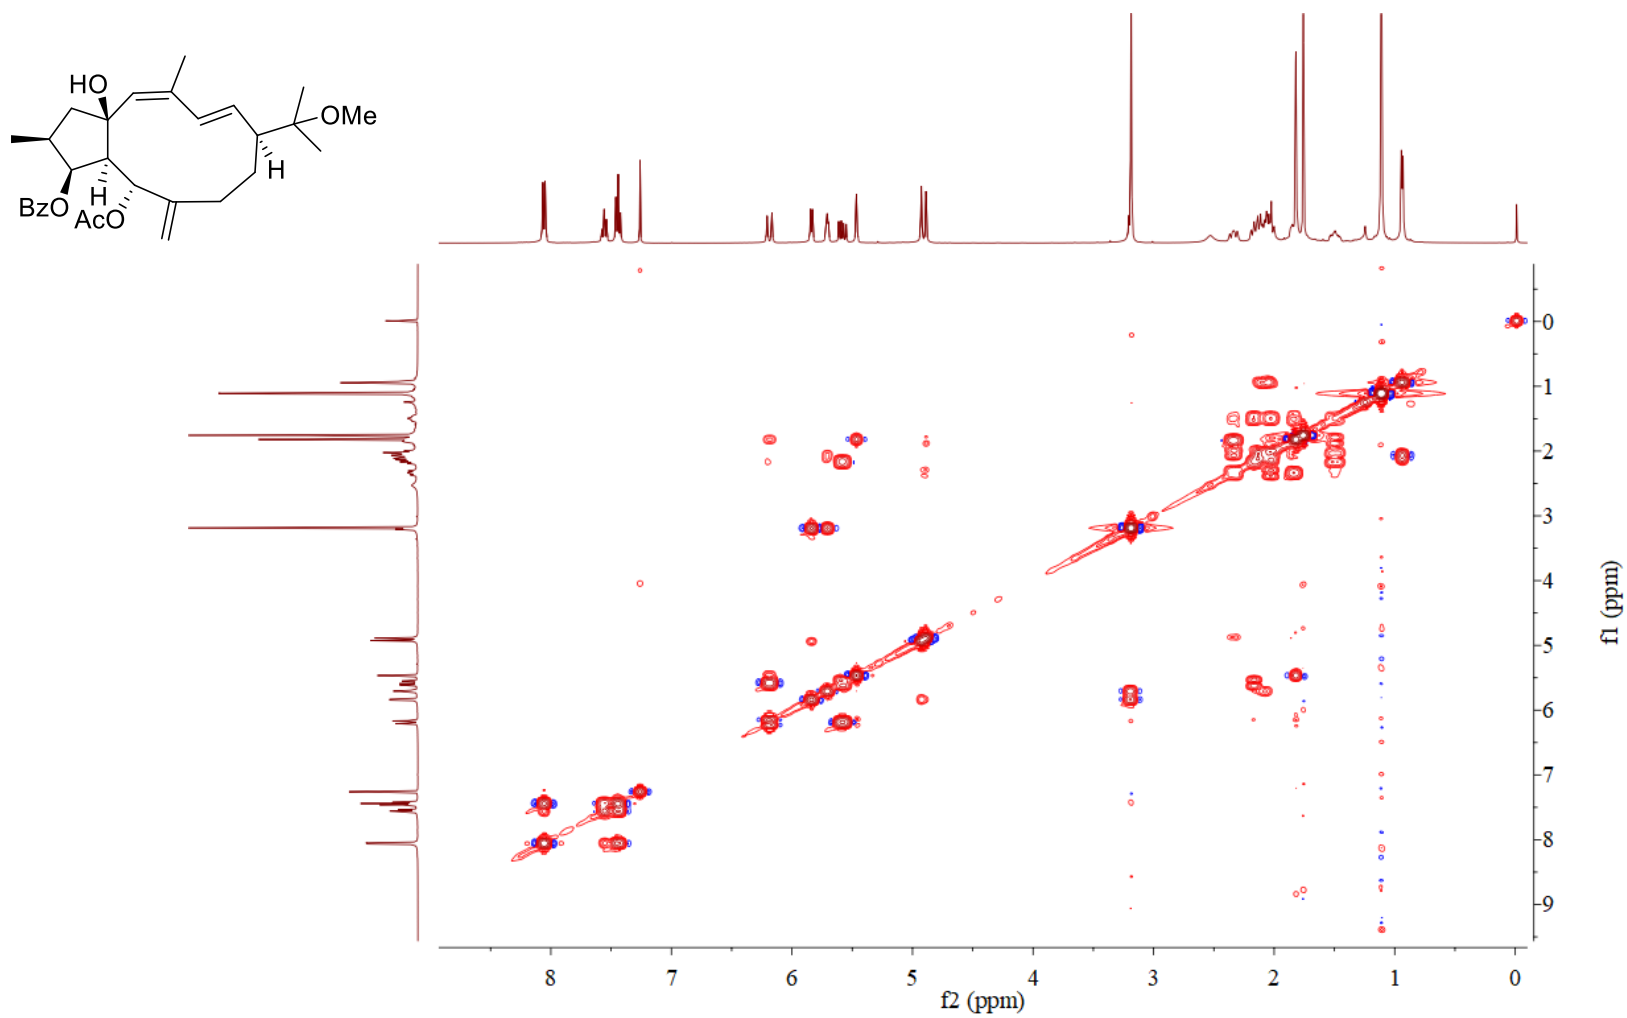

Figure S109. NOESY spectrum of **33** in CDCl<sub>3</sub>.

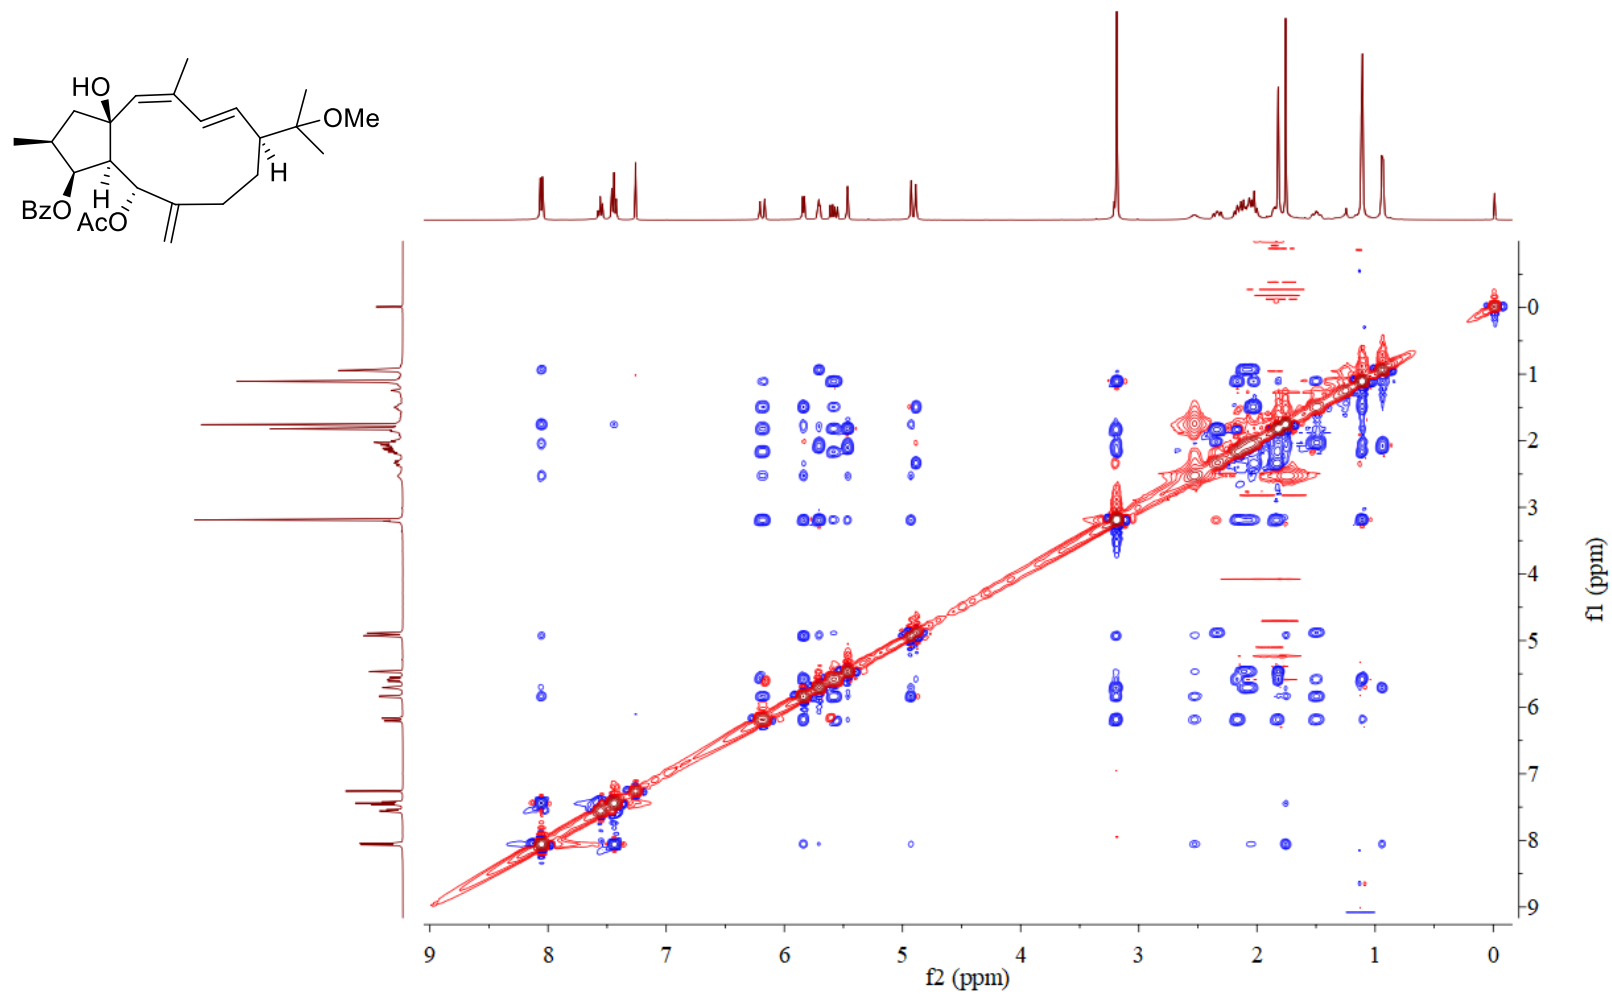

**Figure S110.**  $^1\text{H}$  NMR spectrum of **34** in  $\text{CDCl}_3$ .

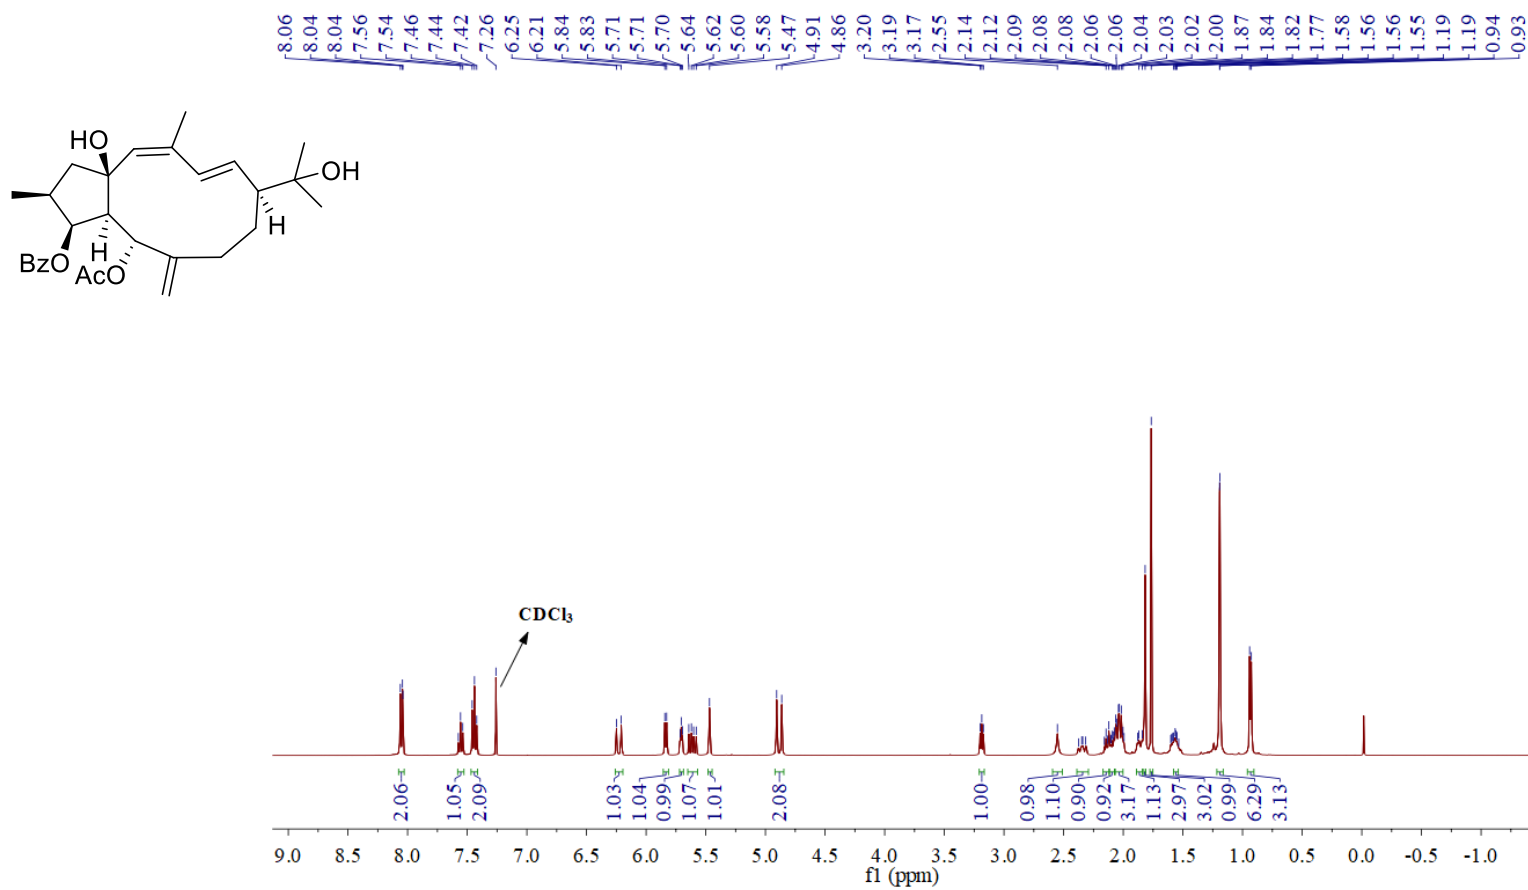



Figure S111.  $^{13}\text{C}$  NMR and DEPT 135 spectra of **34** in  $\text{CDCl}_3$ .

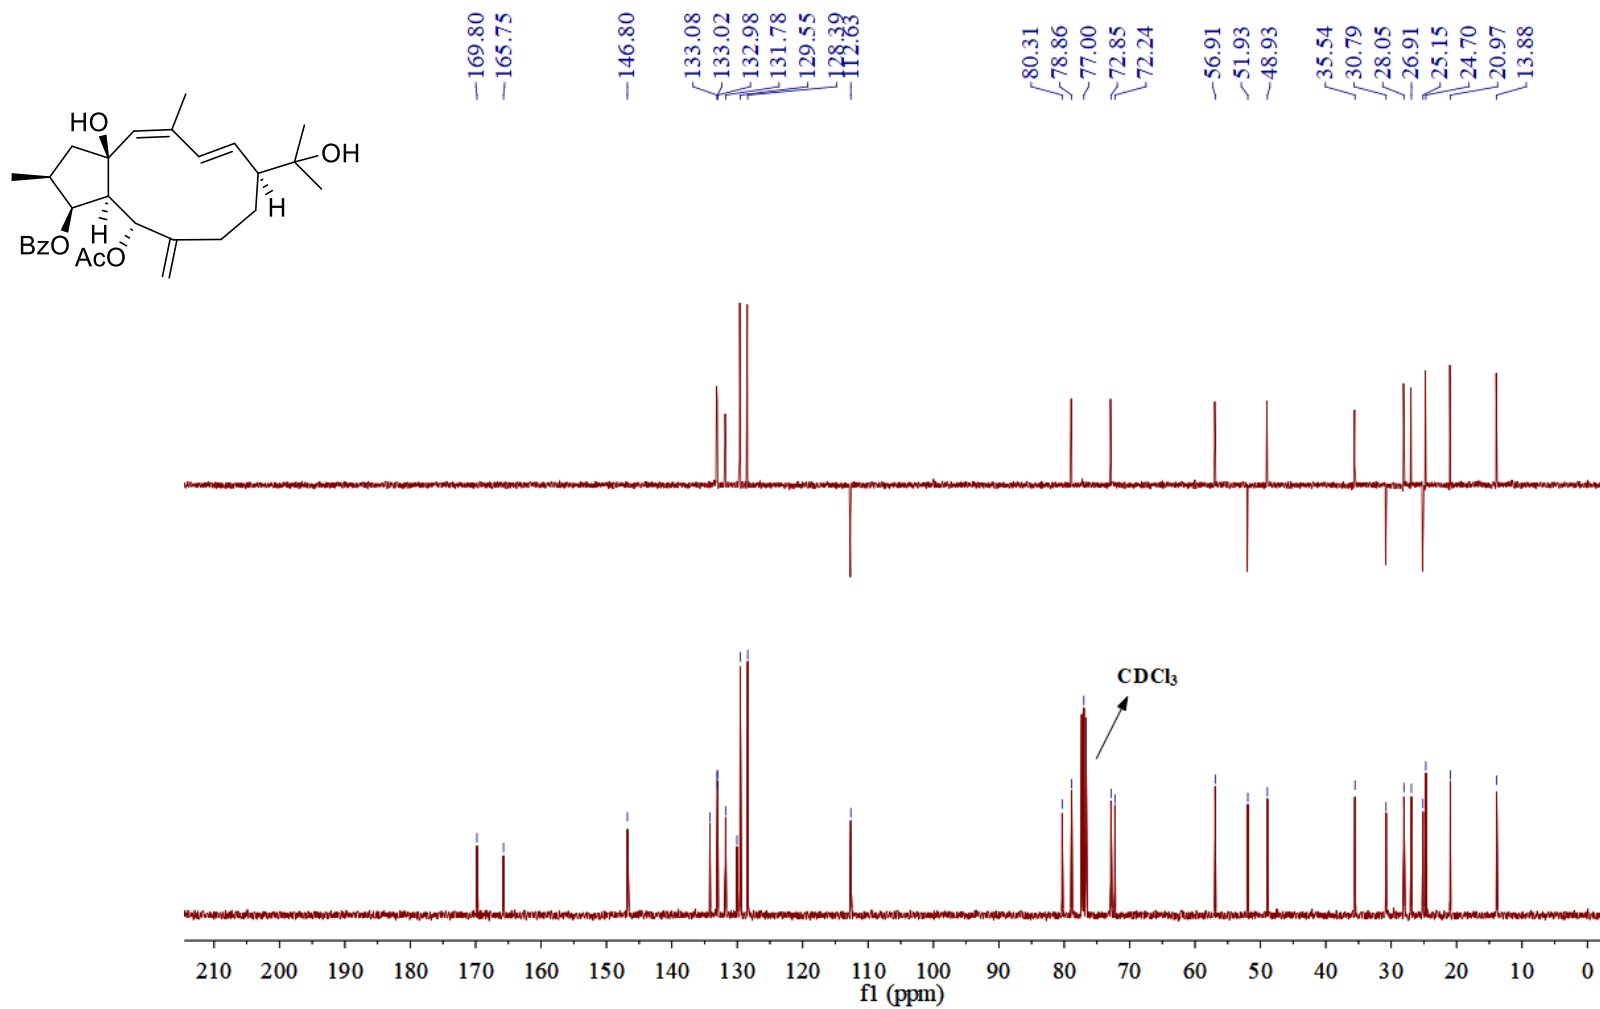

Figure S112. HSQC spectrum of **34** in CDCl<sub>3</sub>.

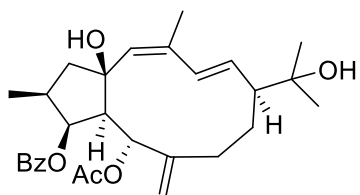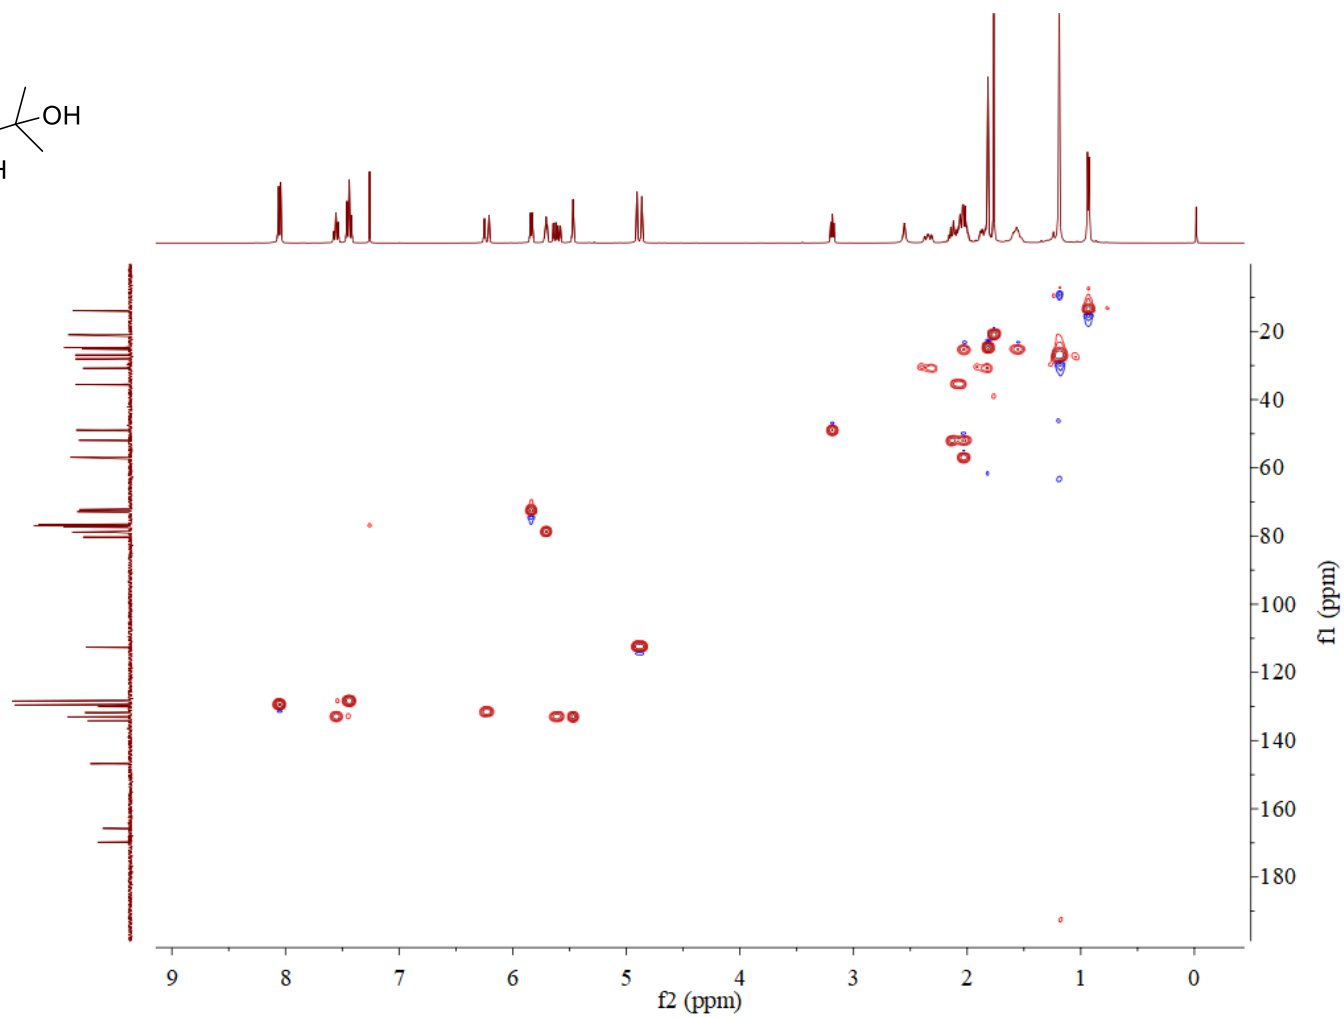

Figure S113. HMBC spectrum of **34** in CDCl<sub>3</sub>.

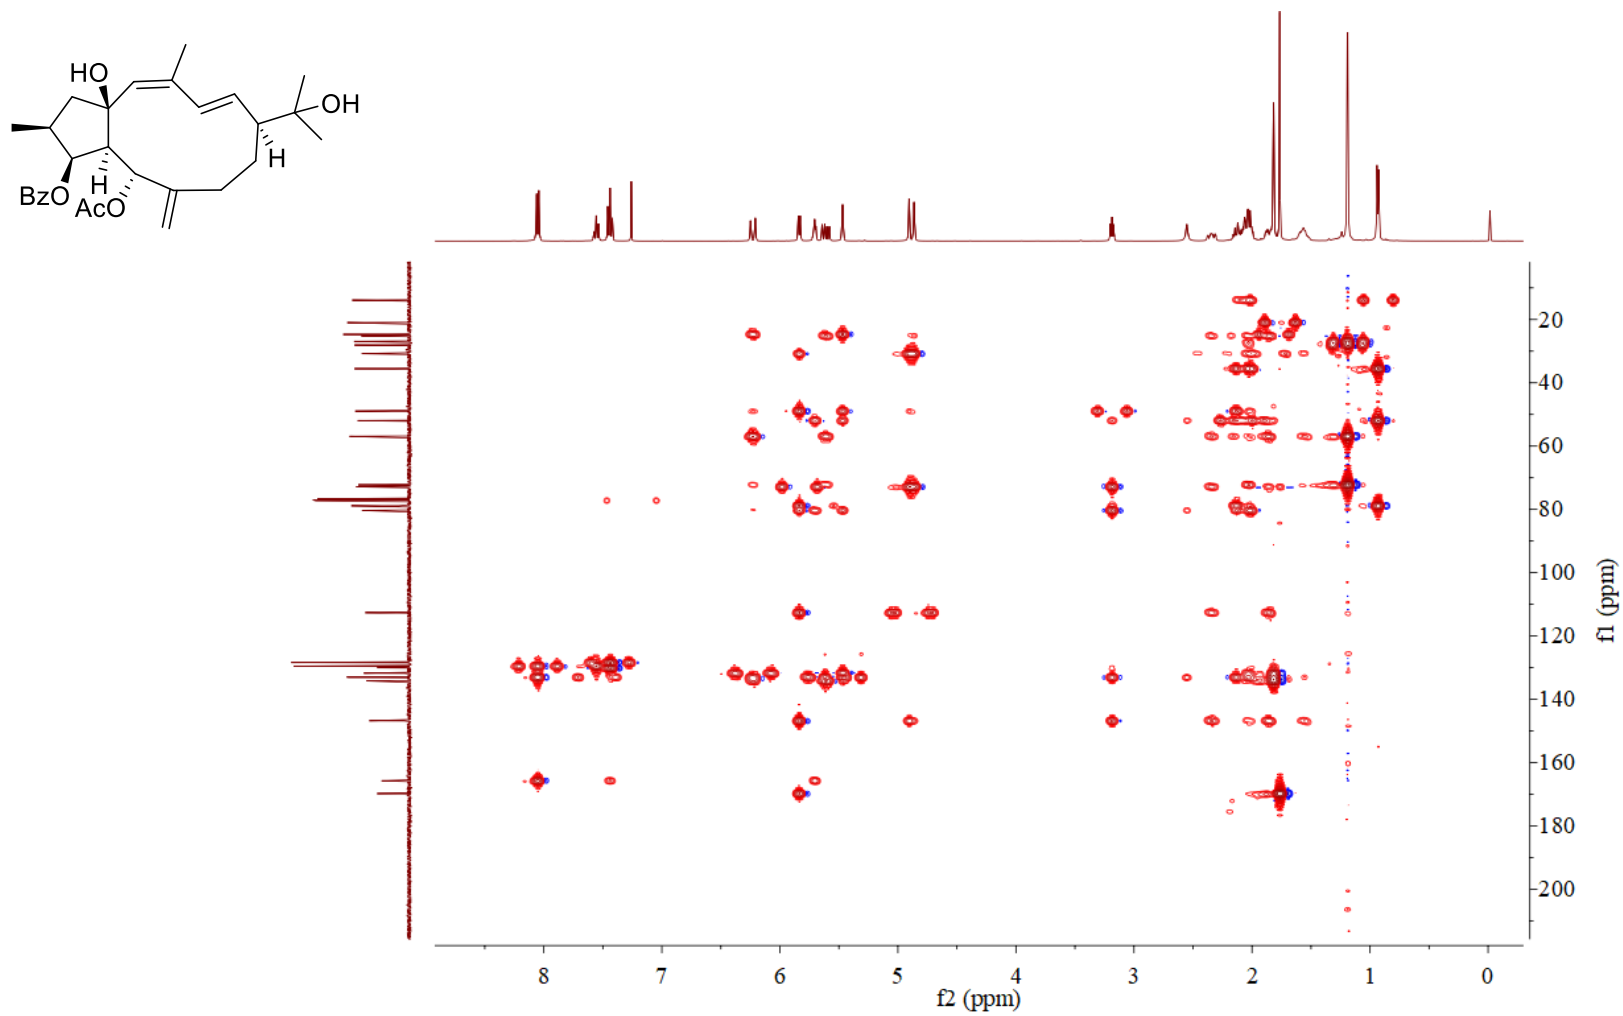

Figure S114.  $^1\text{H}$ - $^1\text{H}$  NMR spectrum of **34** in  $\text{CDCl}_3$ .

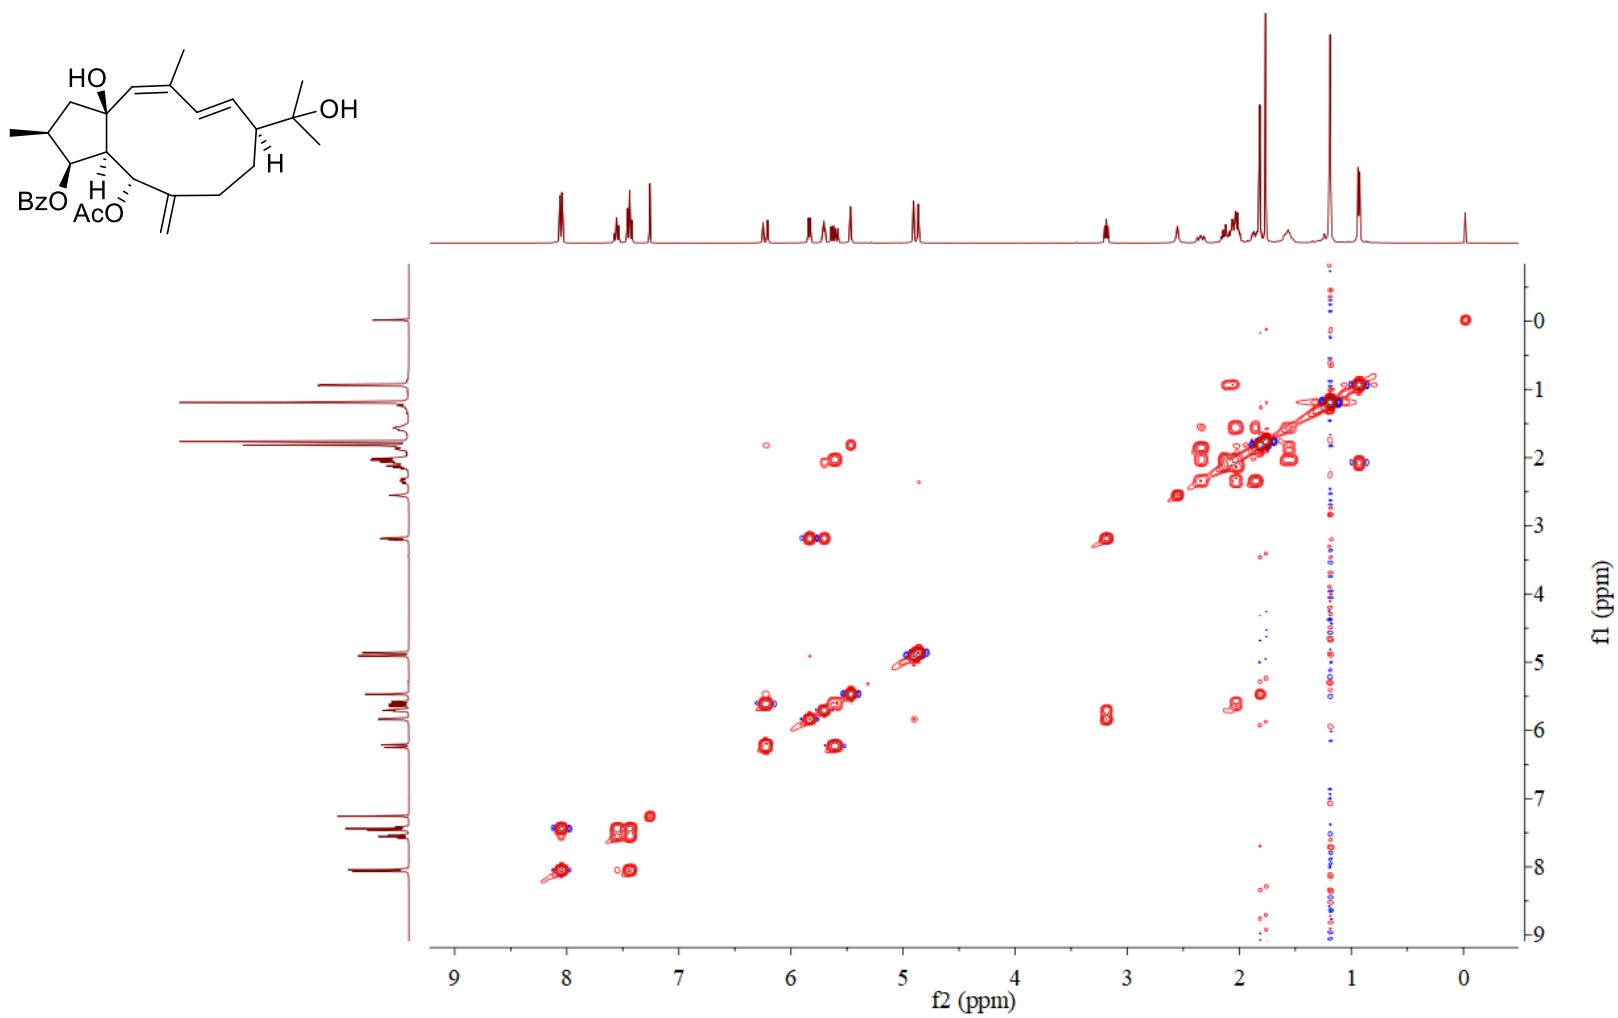

Figure S115. NOESY spectrum of **34** in CDCl<sub>3</sub>.

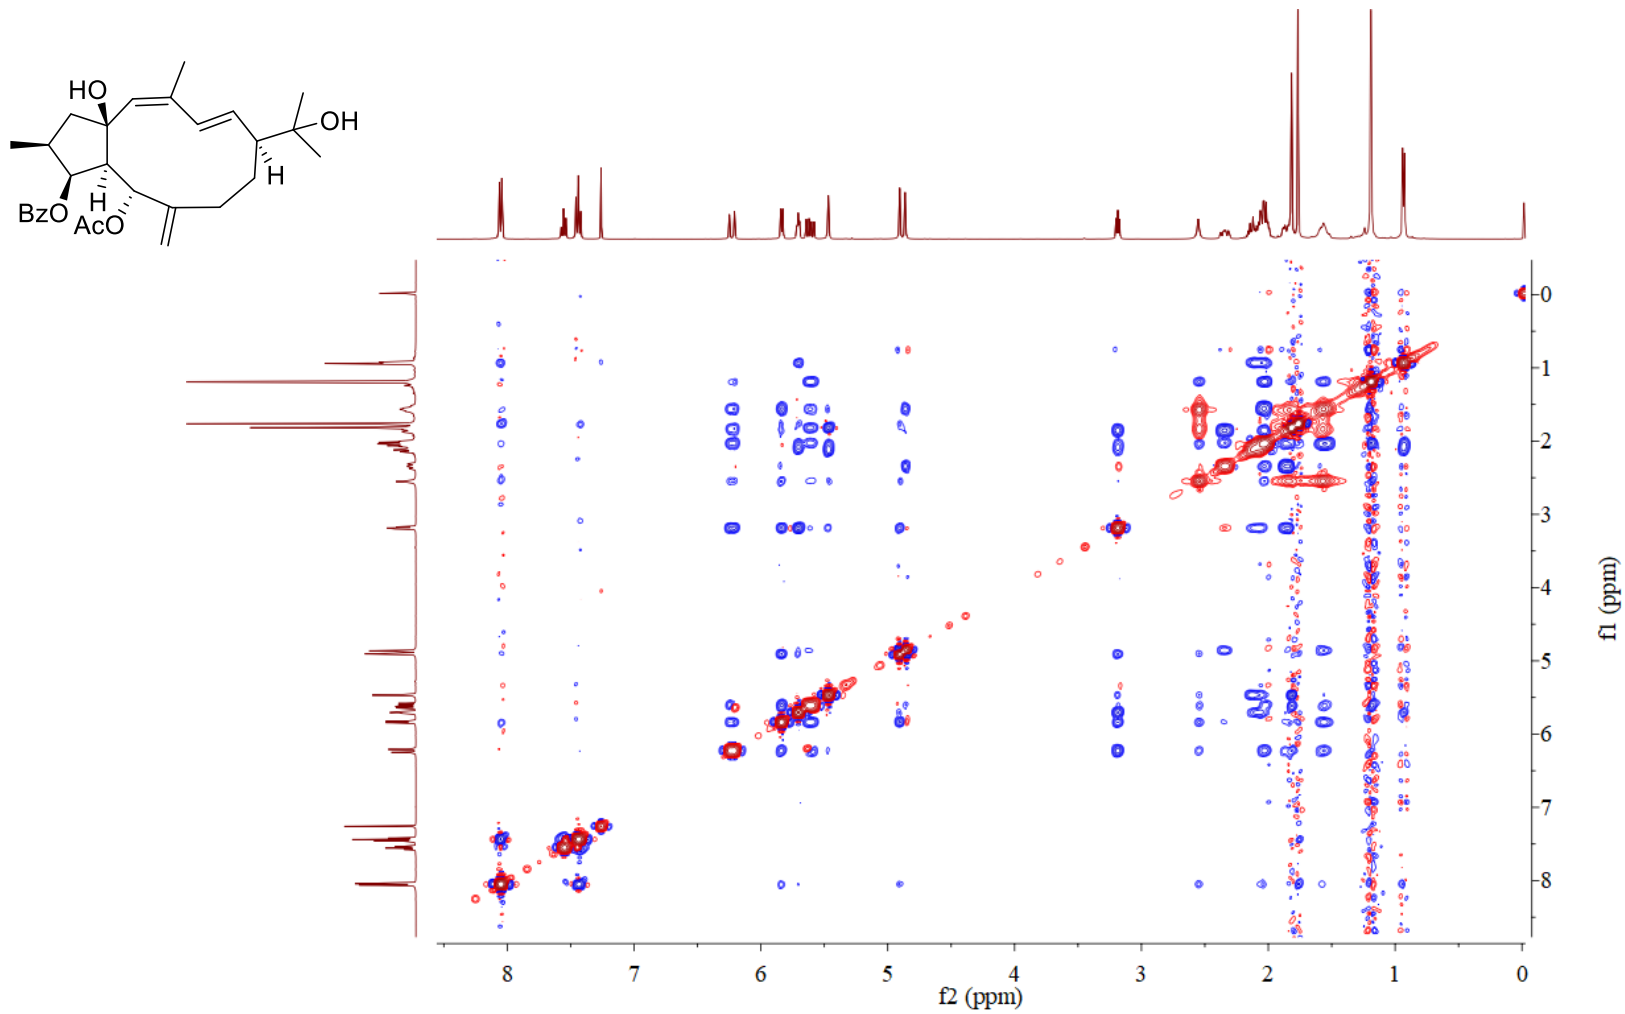

11. Figure S116–S145.

Figure S116. <sup>1</sup>H NMR spectrum of **6** in CDCl<sub>3</sub>.

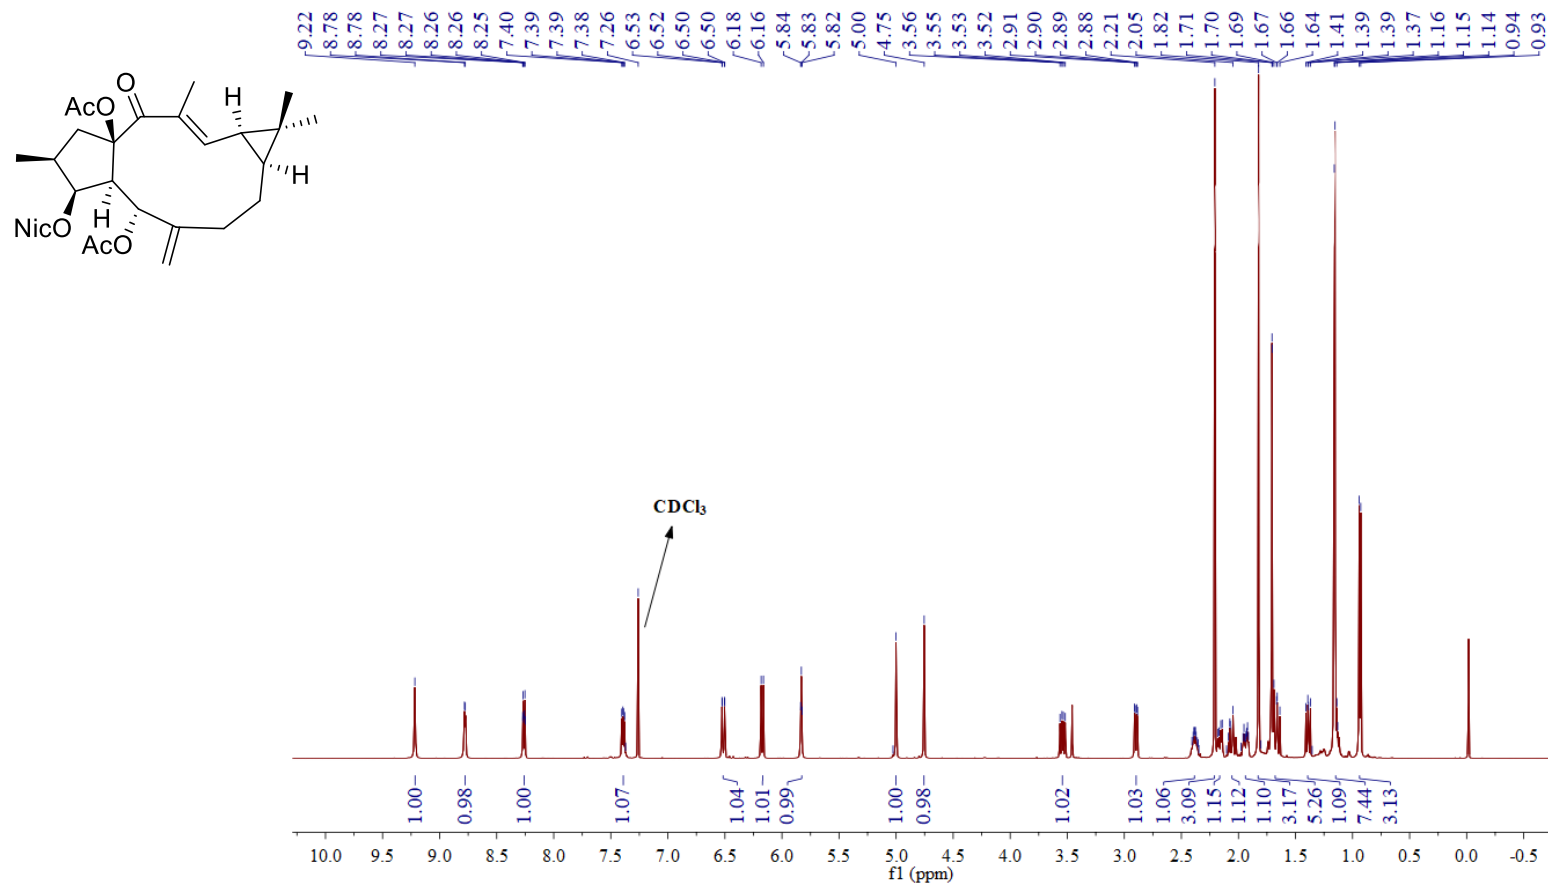

Figure S117.  $^{13}\text{C}$  NMR and DEPT 135 spectra of **6** in  $\text{CDCl}_3$ .

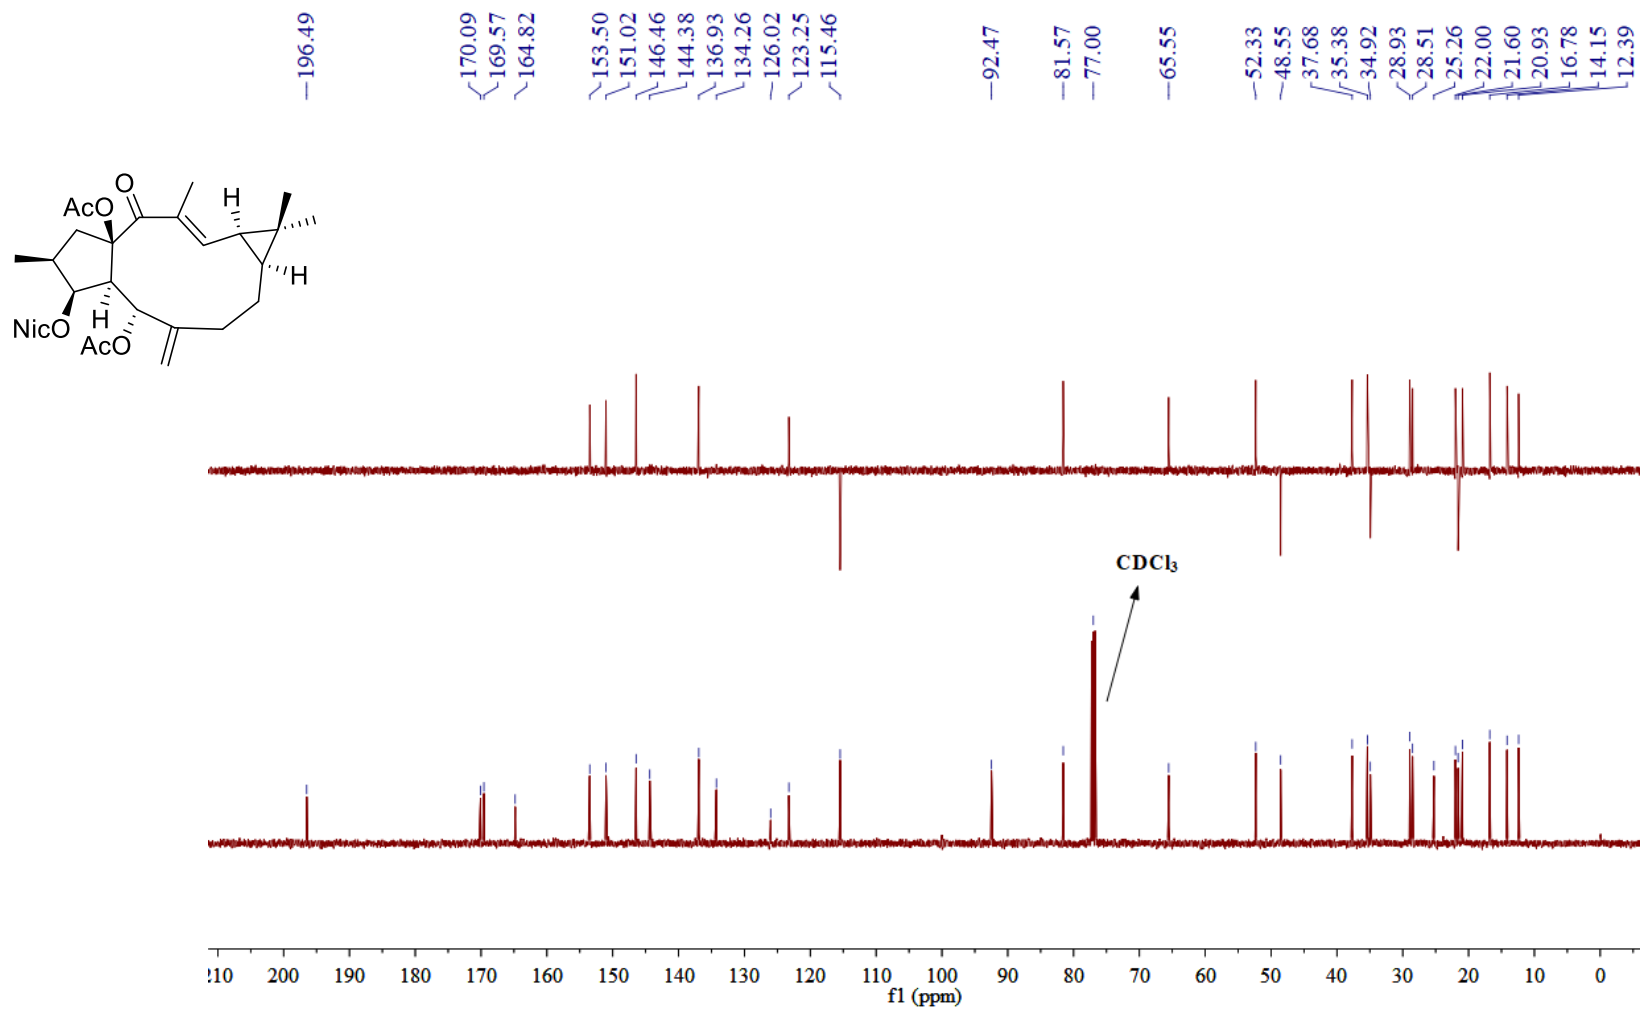

Figure S118. <sup>1</sup>H NMR spectrum of **7** in CDCl<sub>3</sub>.

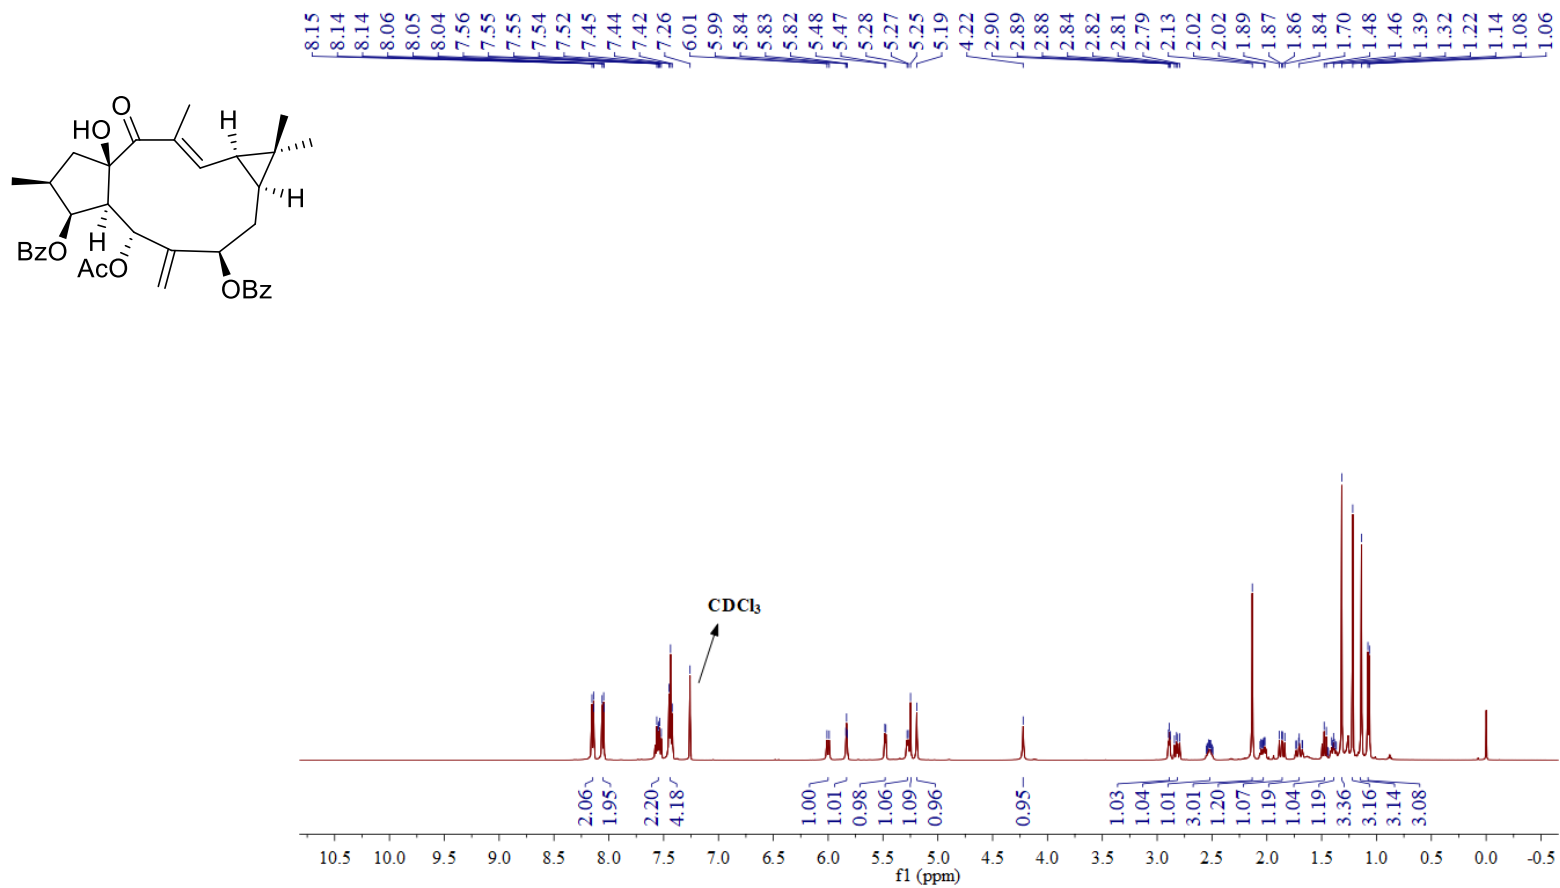



Figure S119.  $^{13}\text{C}$  NMR and DEPT 135 spectra of **7** in  $\text{CDCl}_3$ .

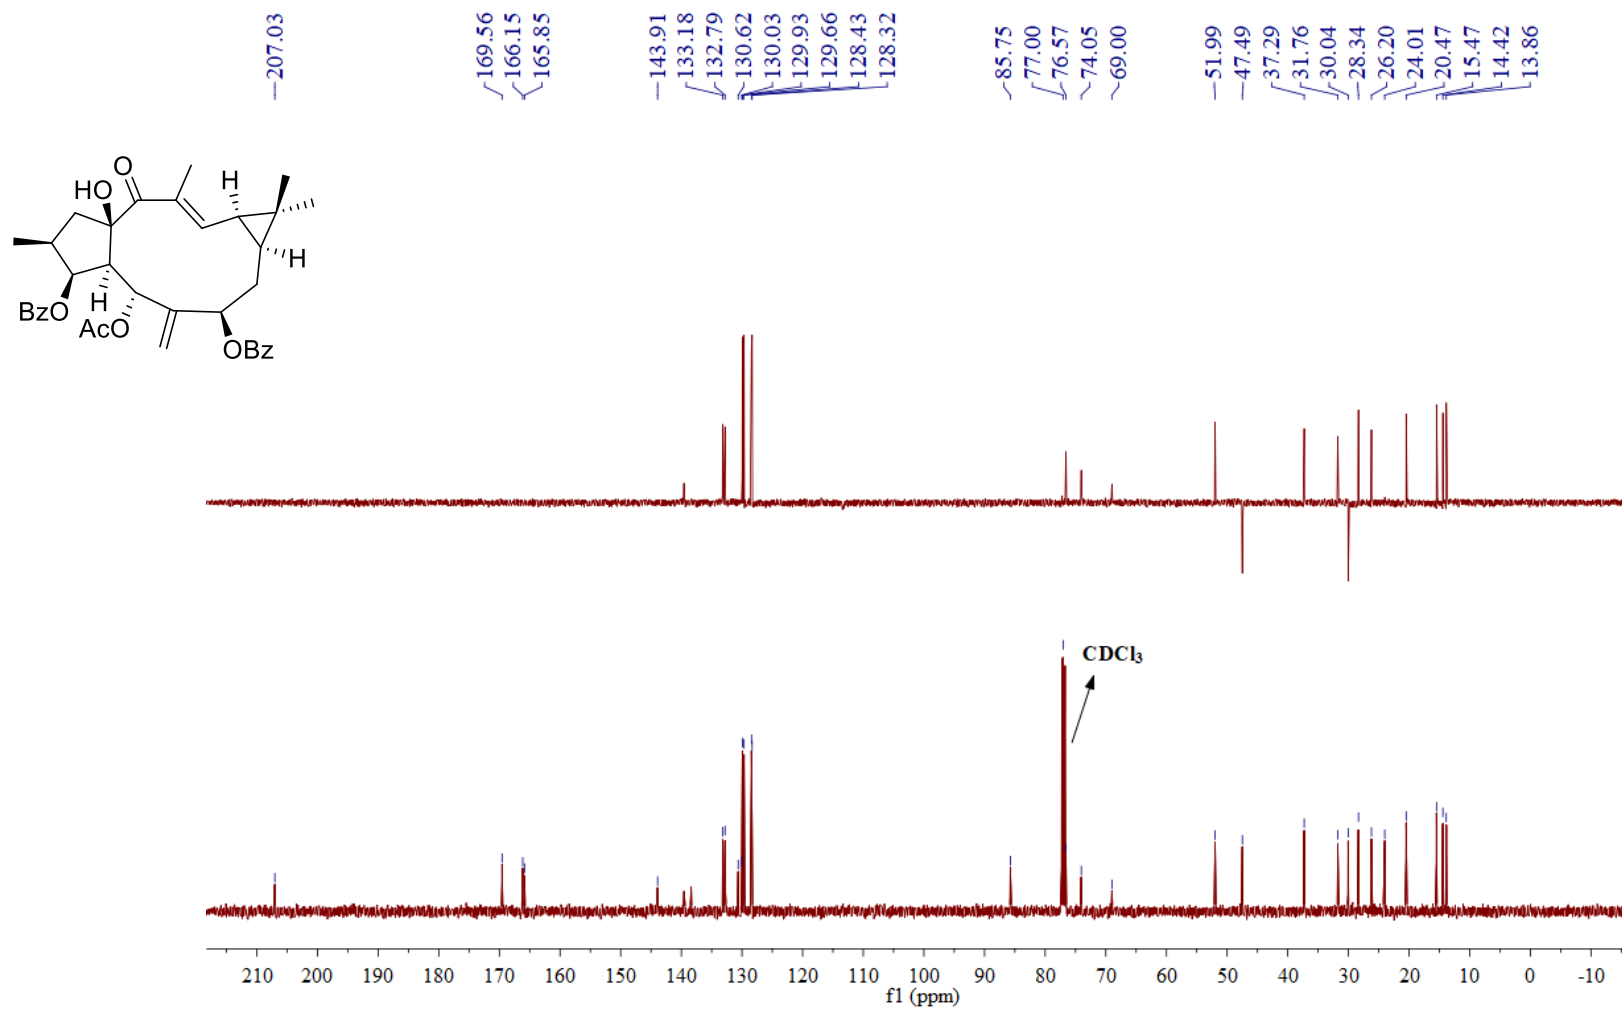

Figure S120. <sup>1</sup>H NMR spectrum of **8** in CDCl<sub>3</sub>.

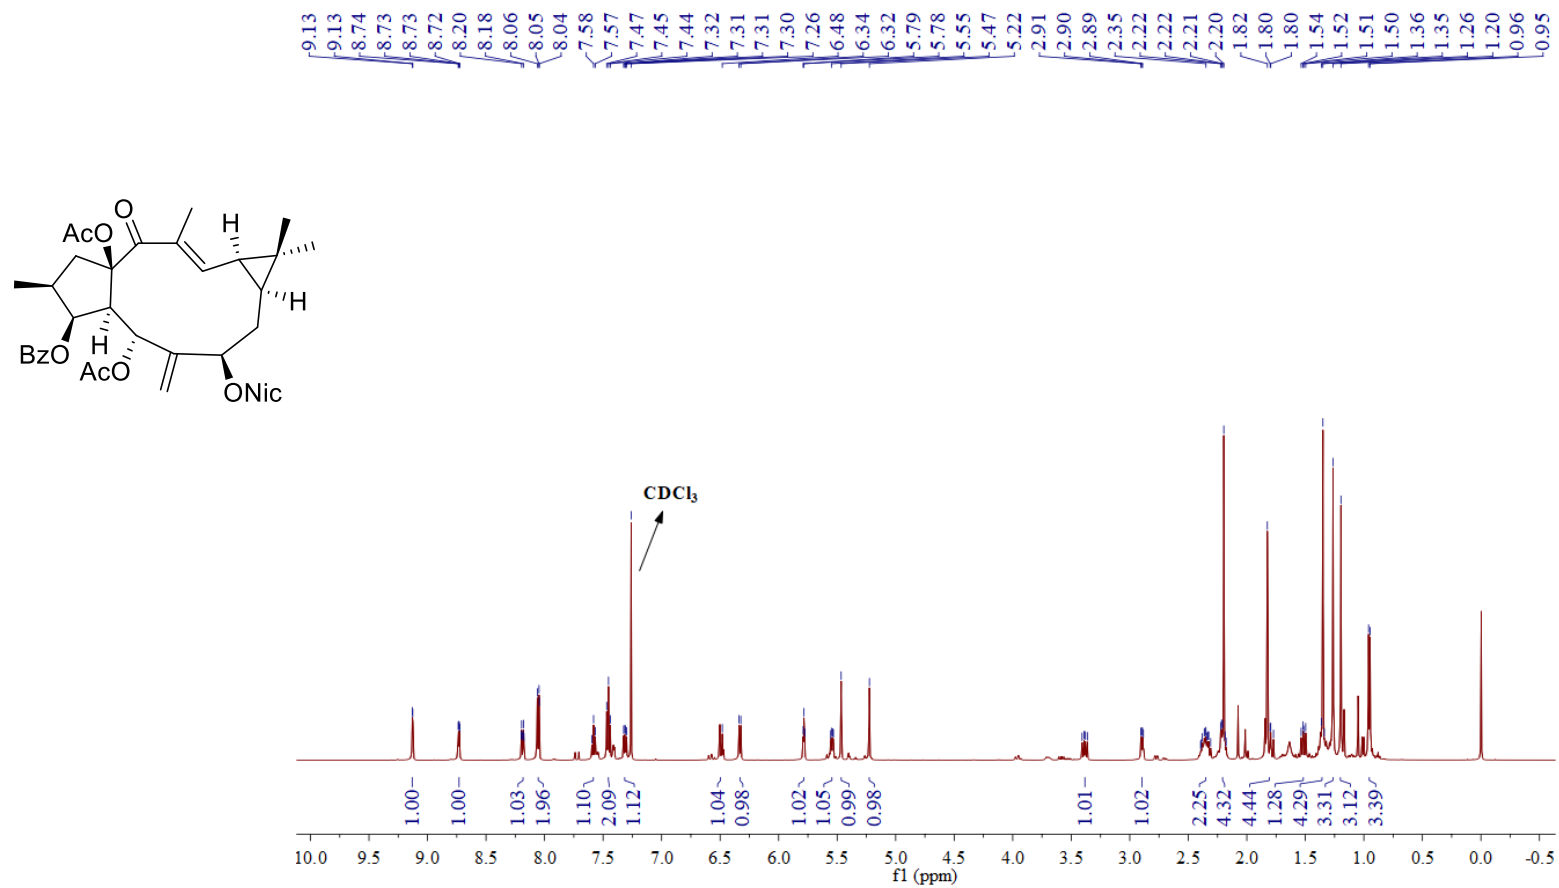

Figure S121.  $^{13}\text{C}$  NMR and DEPT 135 spectra of **8** in  $\text{CDCl}_3$ .

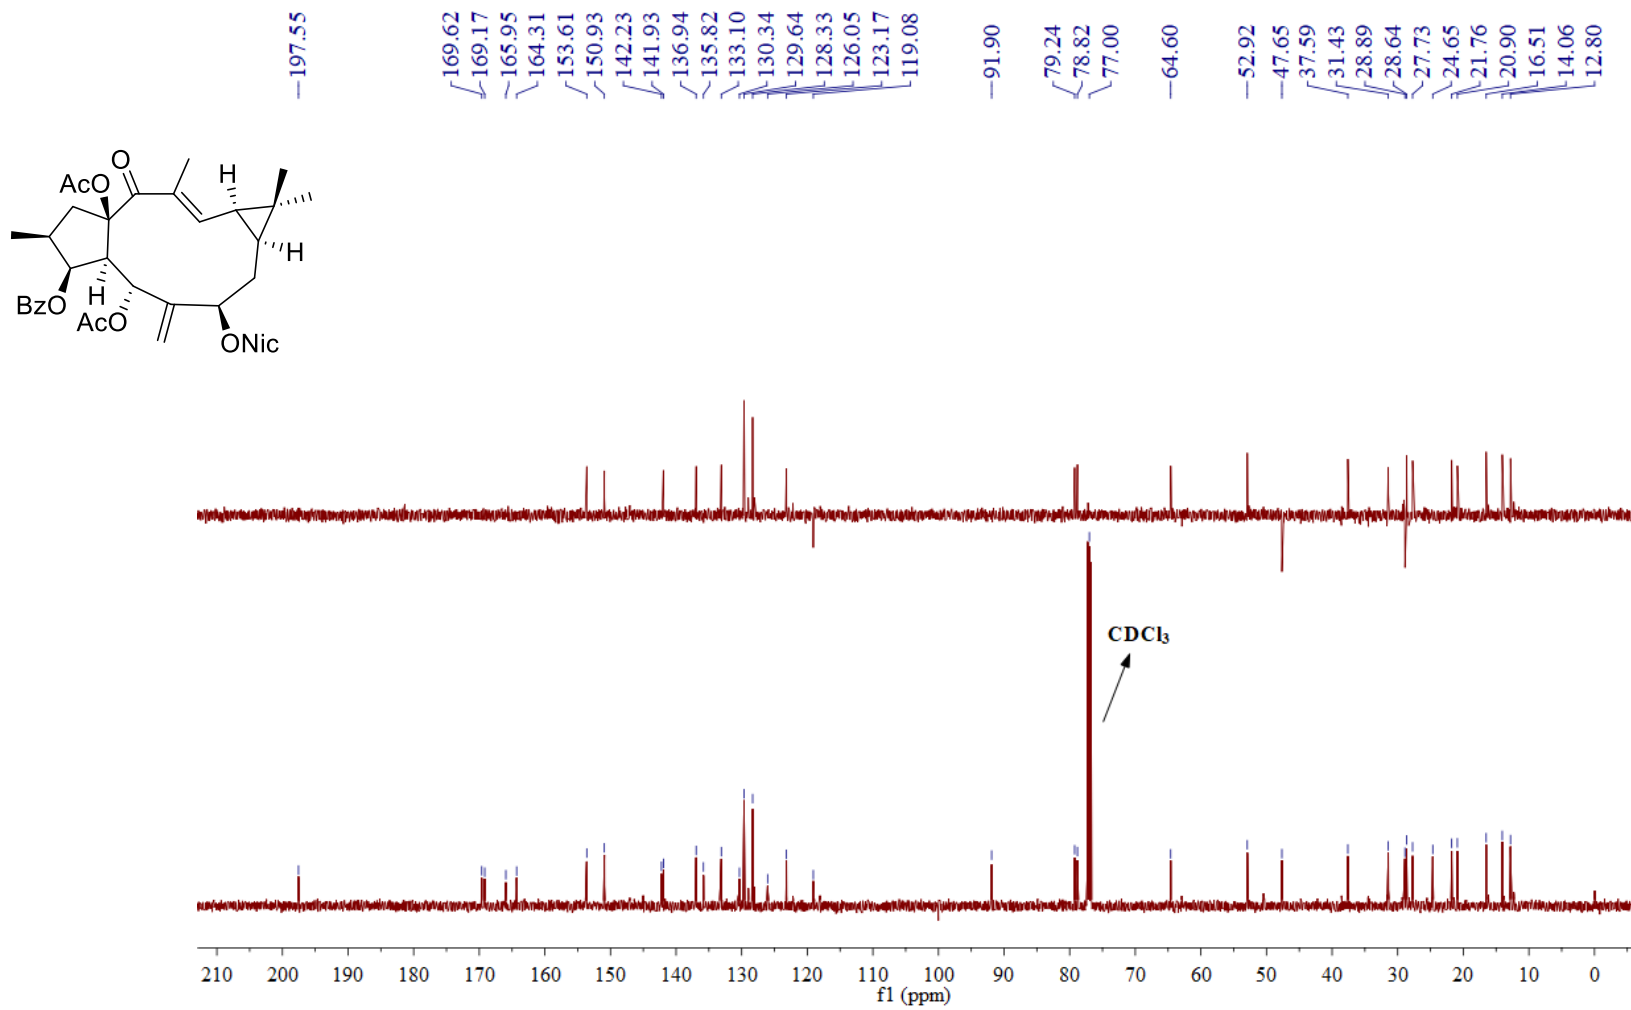

Figure S122. <sup>1</sup>H NMR spectrum of **9** in CDCl<sub>3</sub>.

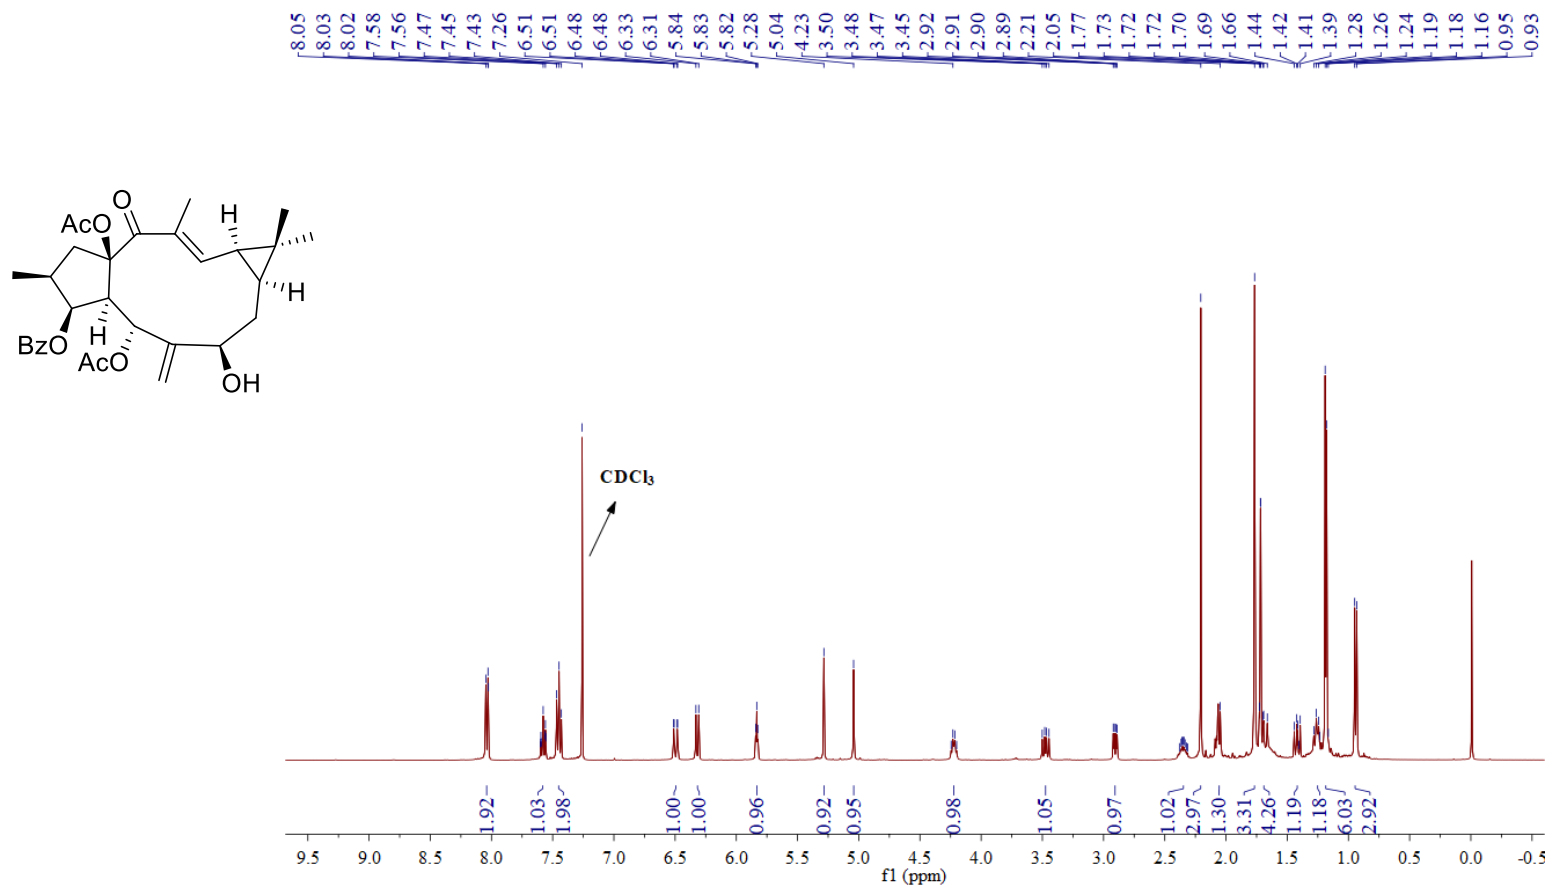

Figure S123.  $^{13}\text{C}$  NMR and DEPT 135 spectra of **9** in  $\text{CDCl}_3$ .

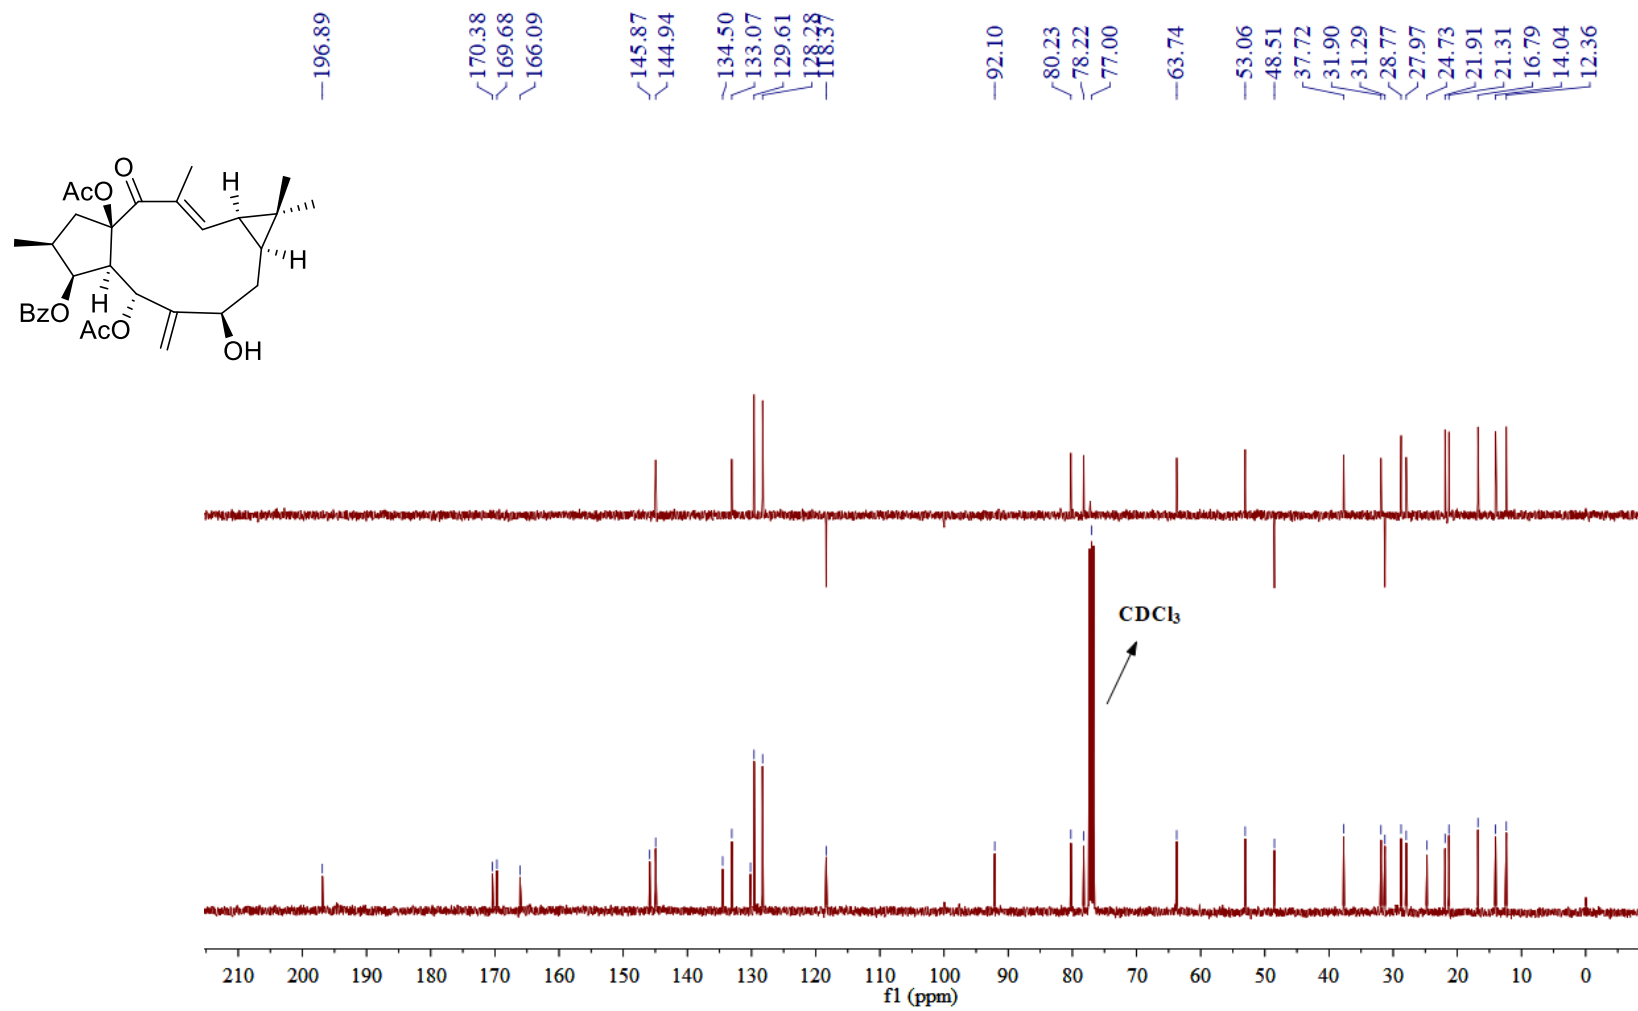

Figure S124. <sup>1</sup>H NMR spectrum of **10** in CDCl<sub>3</sub>.

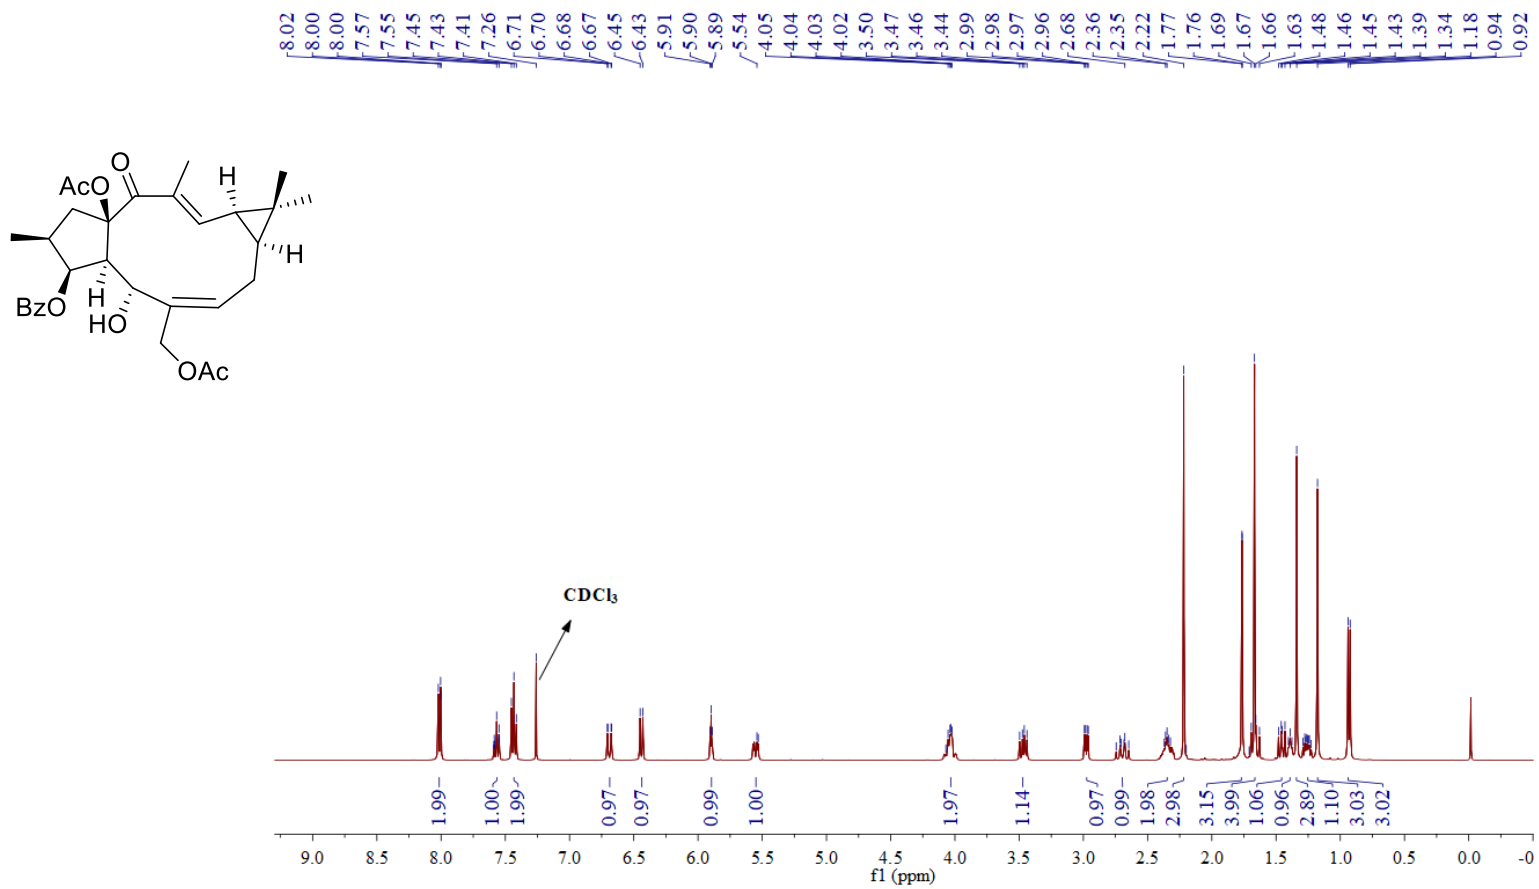

Figure S125.  $^{13}\text{C}$  NMR and DEPT 135 spectra of **10** in  $\text{CDCl}_3$ .

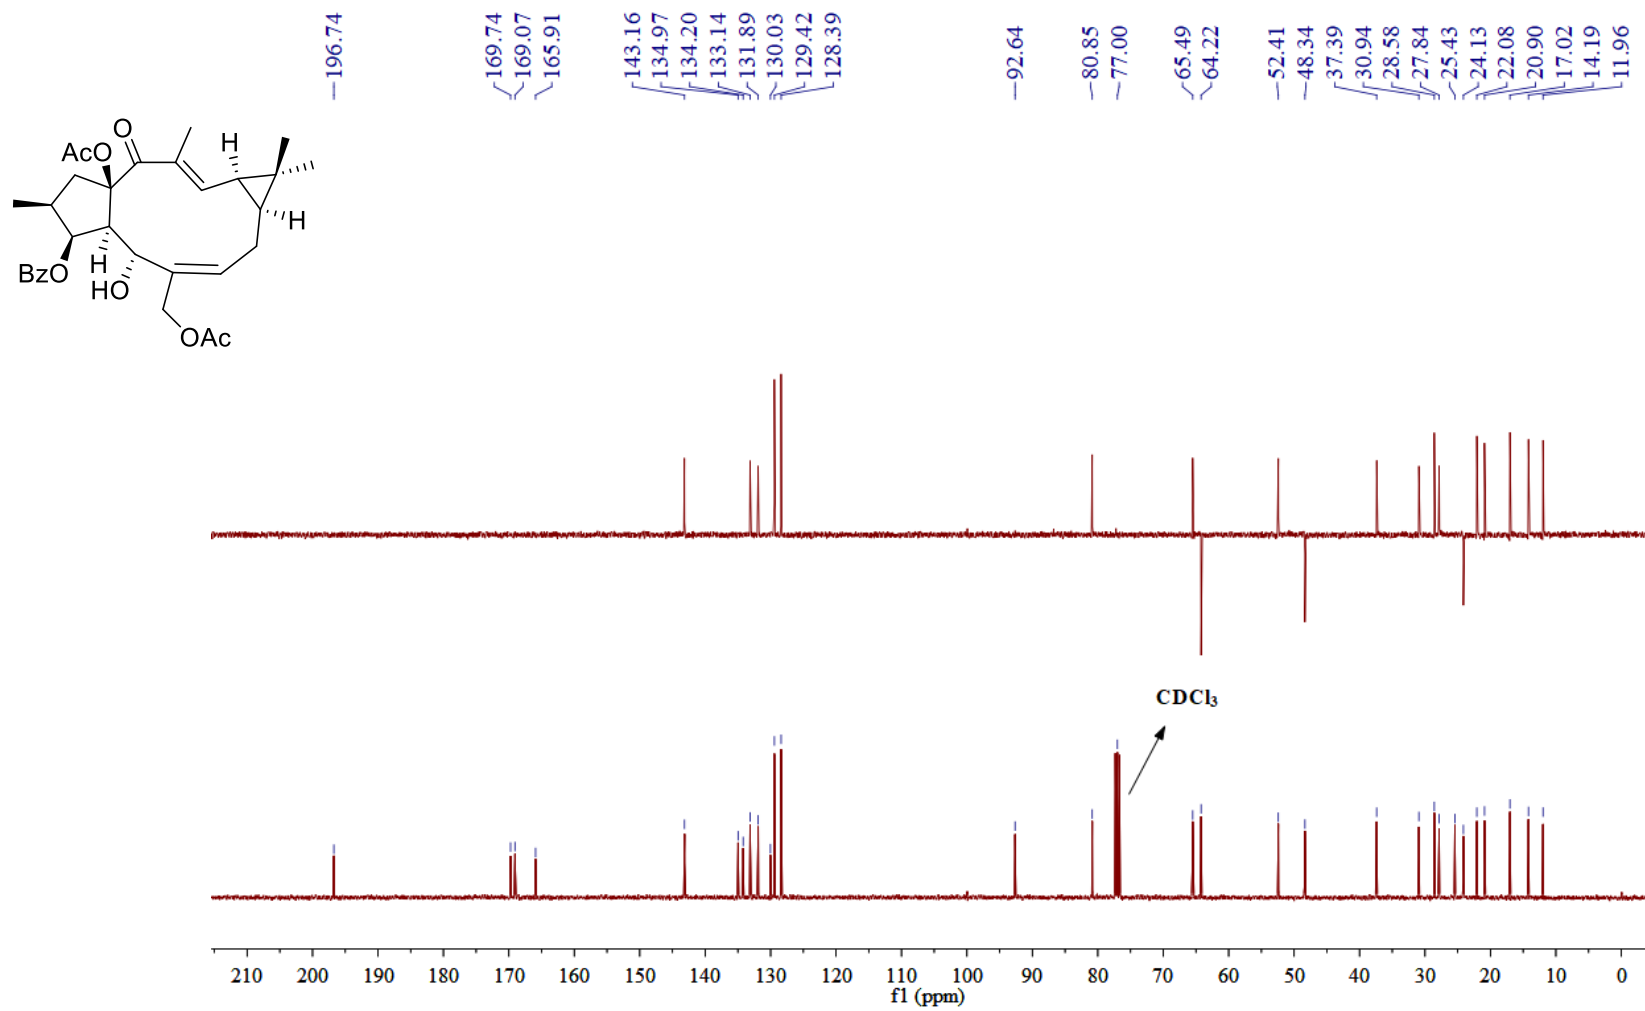

Figure S126. <sup>1</sup>H NMR spectrum of **11** in CDCl<sub>3</sub>.

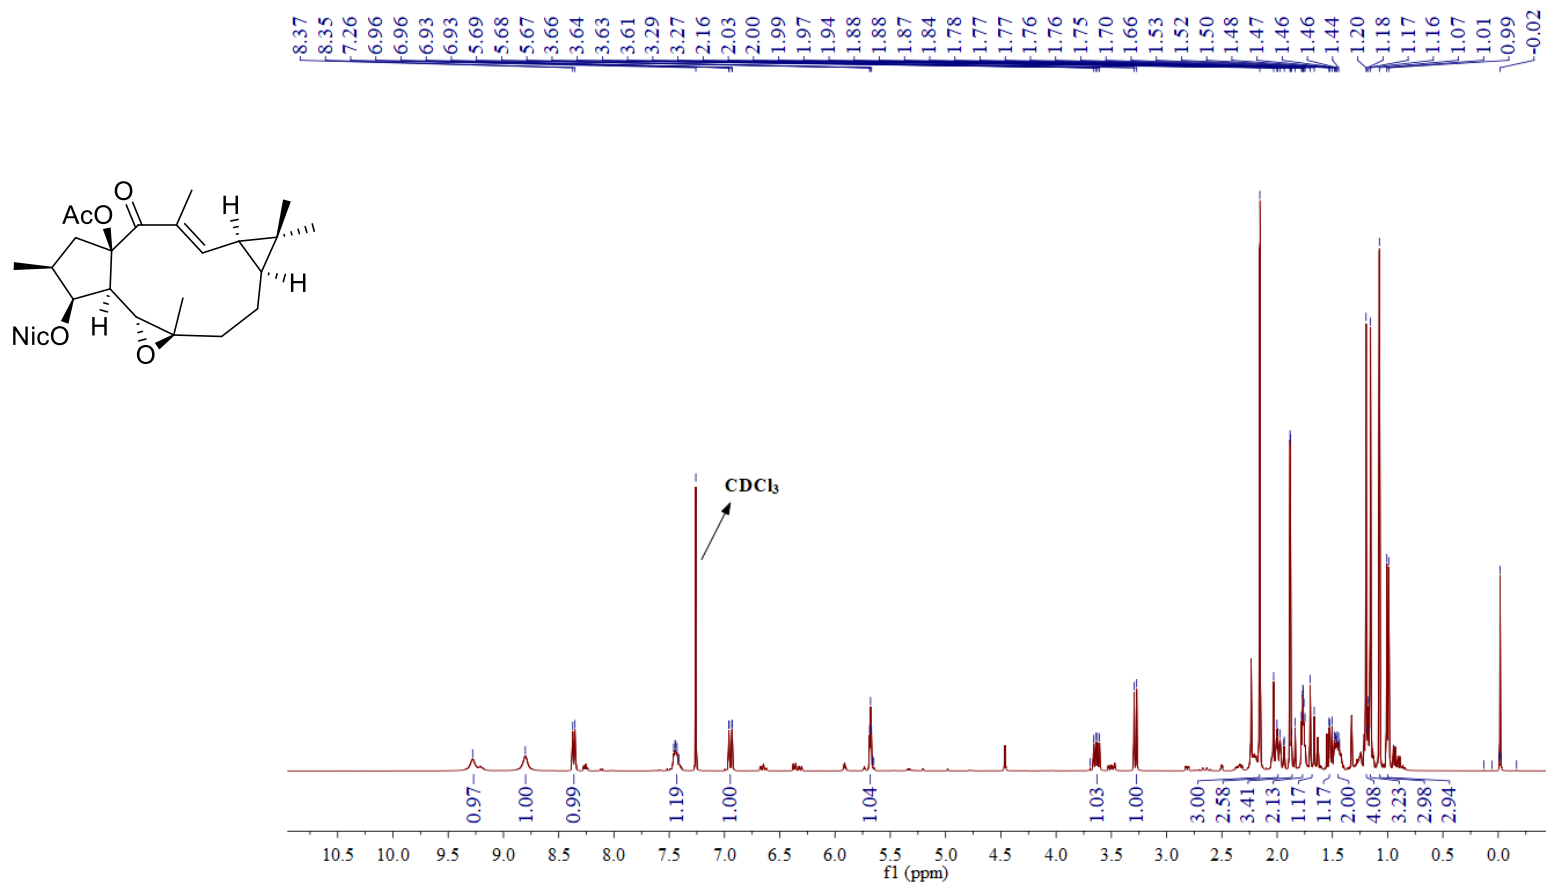



Figure S127.  $^{13}\text{C}$  NMR and DEPT 135 spectra of **11** in  $\text{CDCl}_3$ .

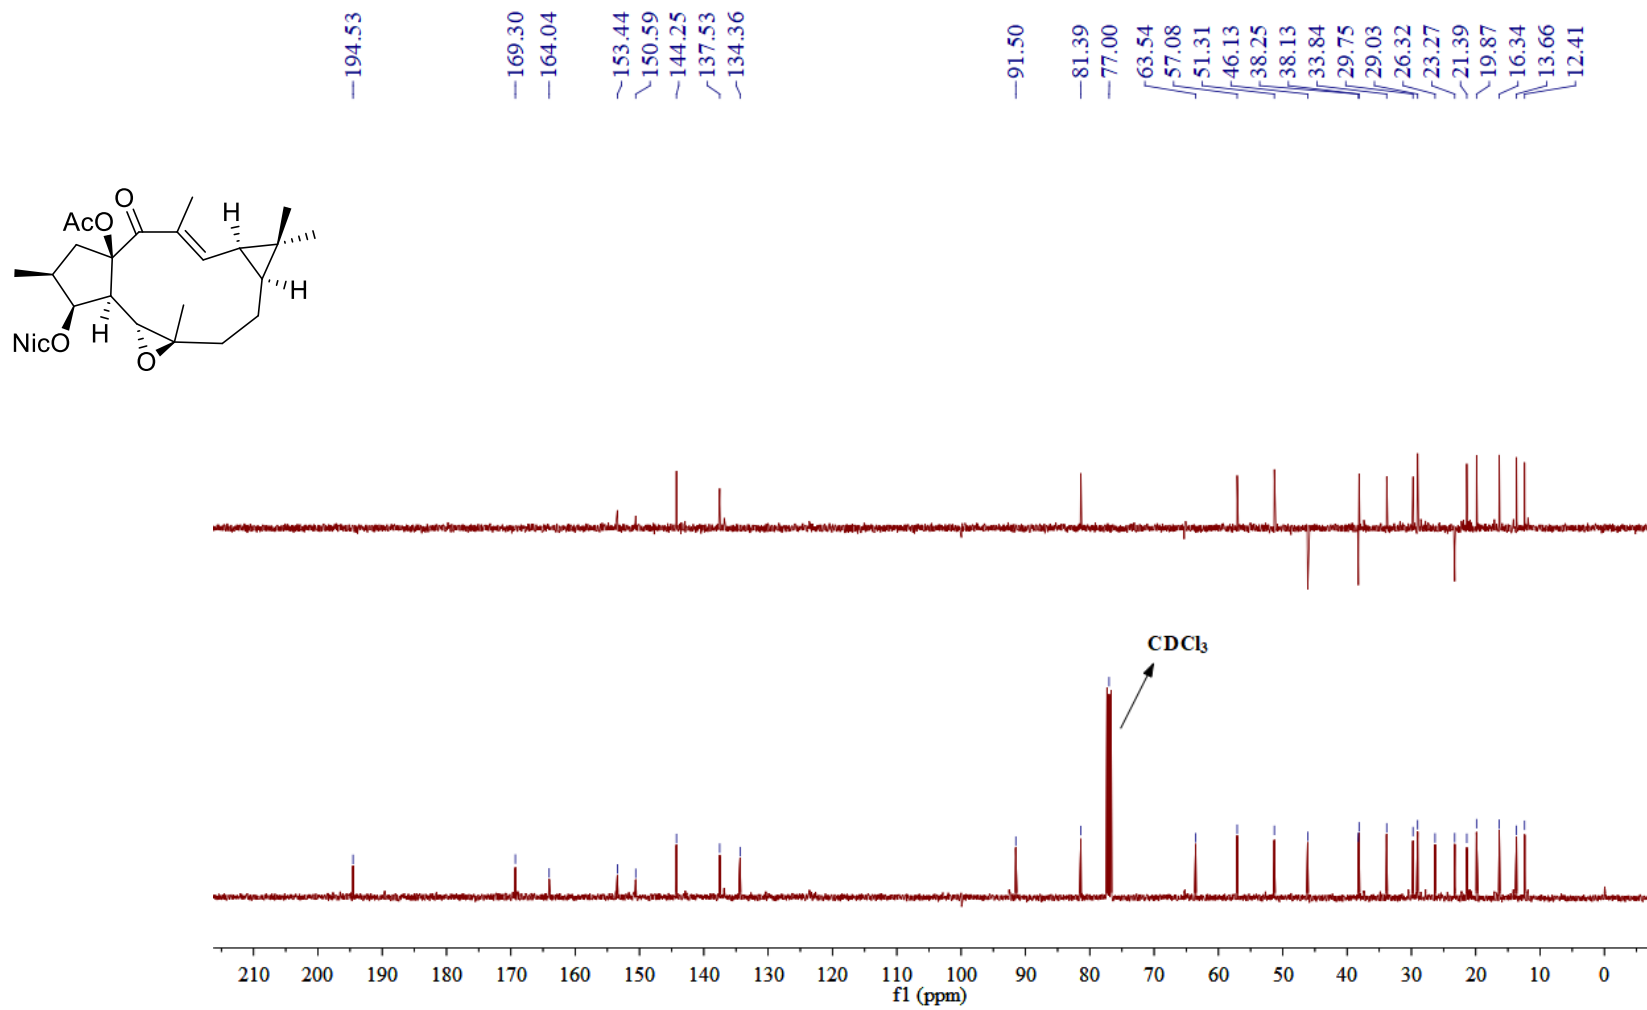

Figure S128. <sup>1</sup>H NMR spectrum of **12** in CDCl<sub>3</sub>.

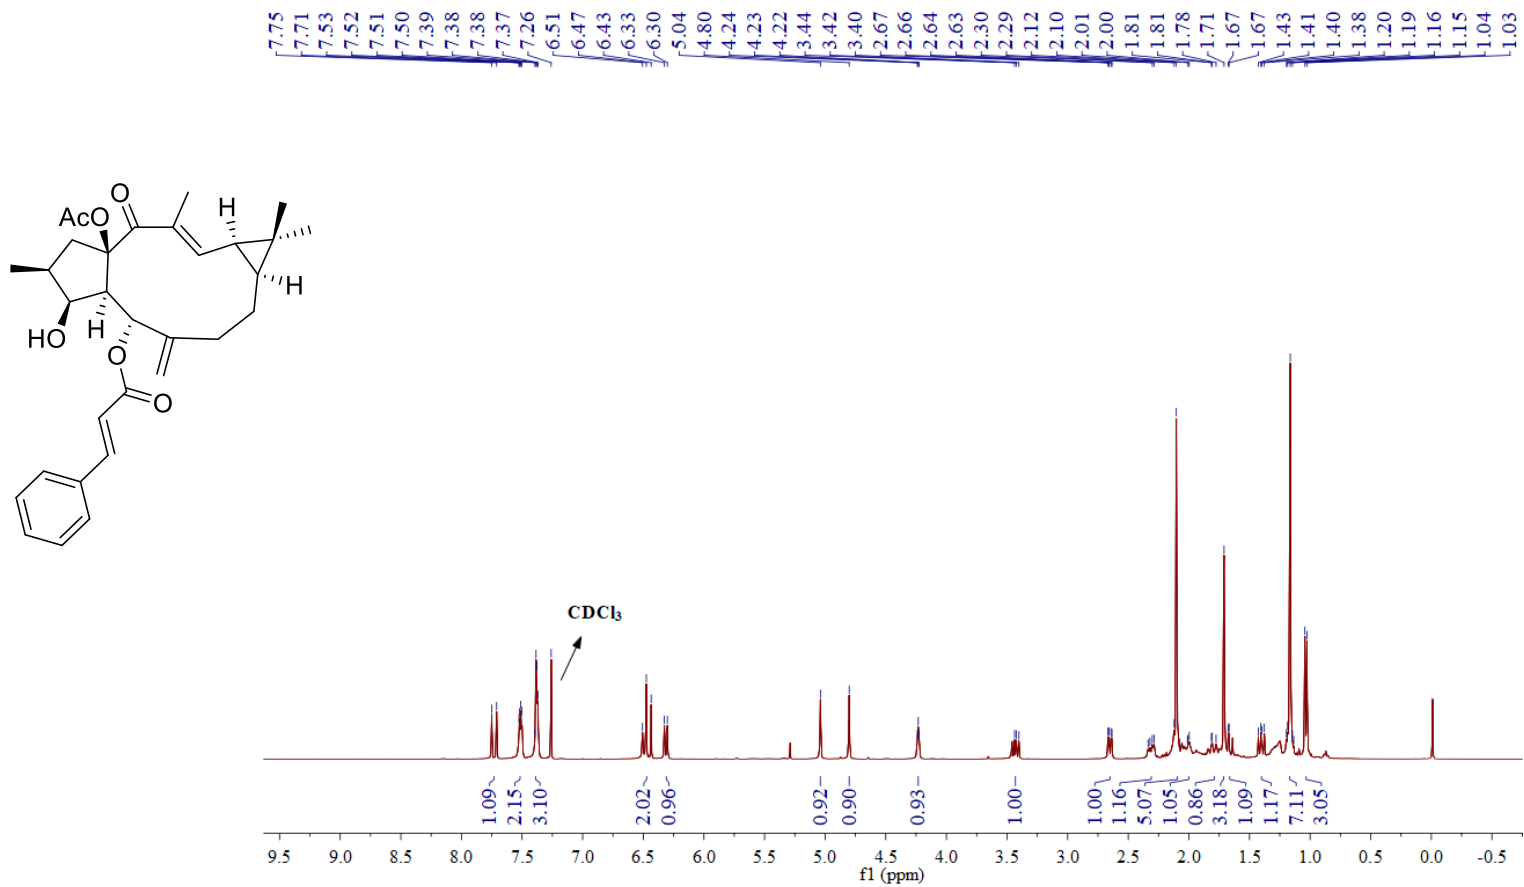

Figure S129.  $^{13}\text{C}$  NMR and DEPT 135 spectra of **12** in  $\text{CDCl}_3$ .

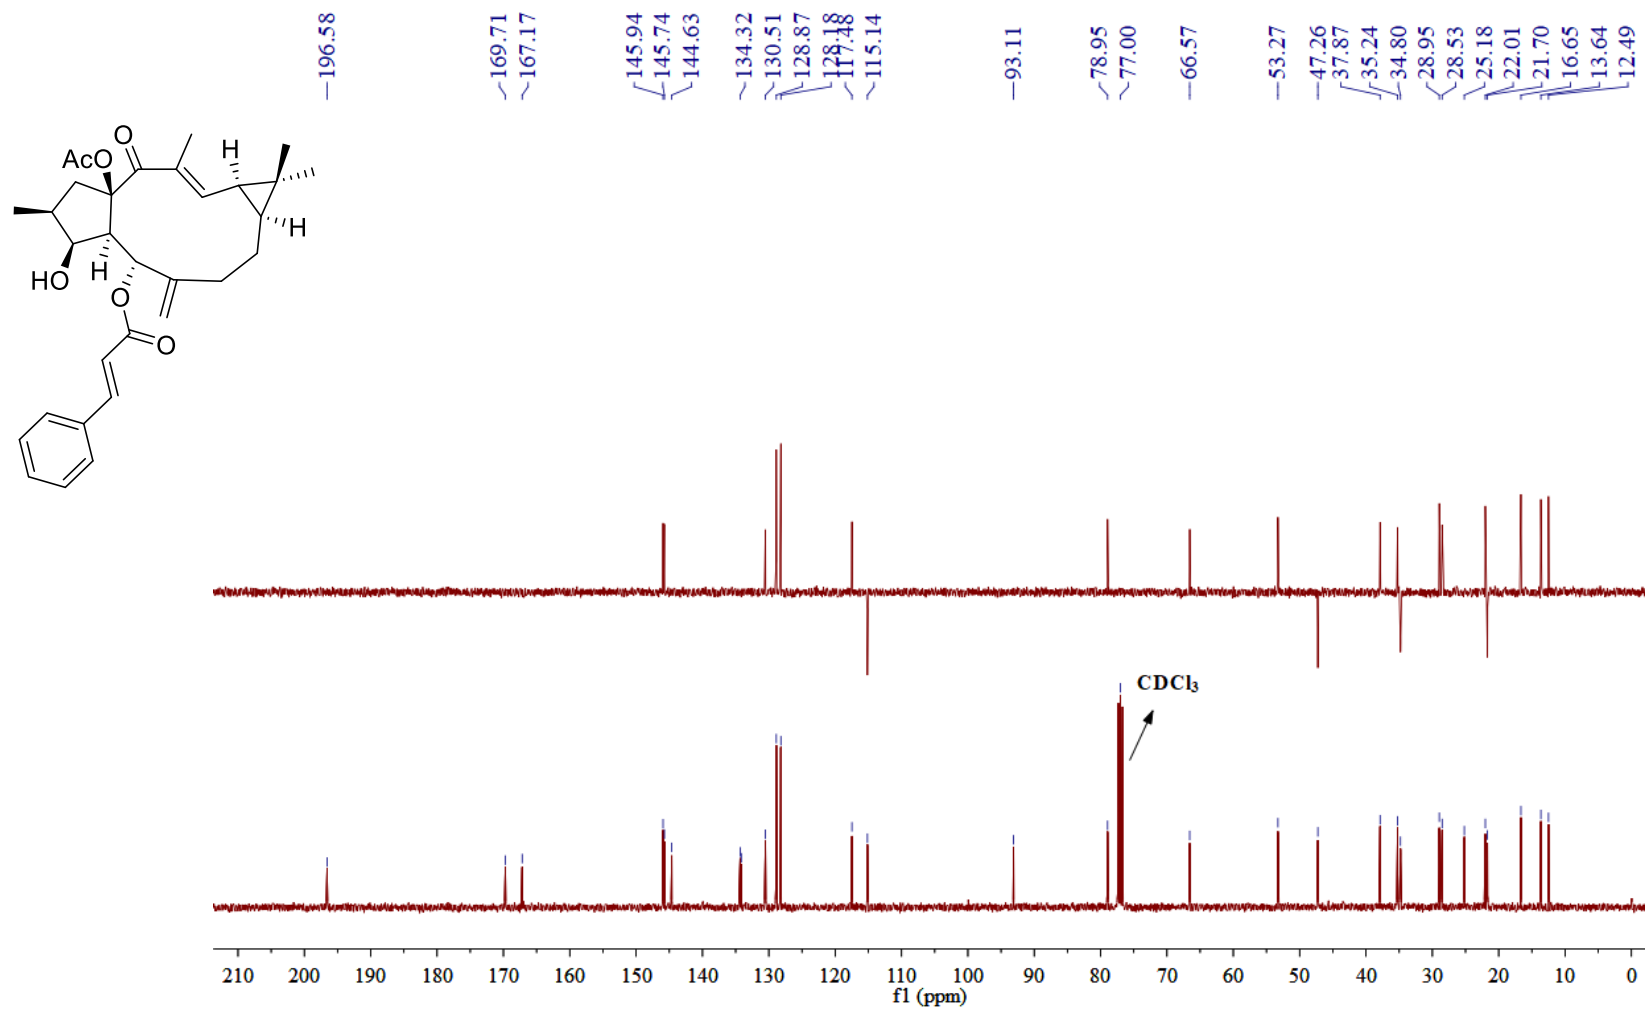

Figure S130.  $^1\text{H}$  NMR spectrum of **13** in  $\text{CDCl}_3$ .

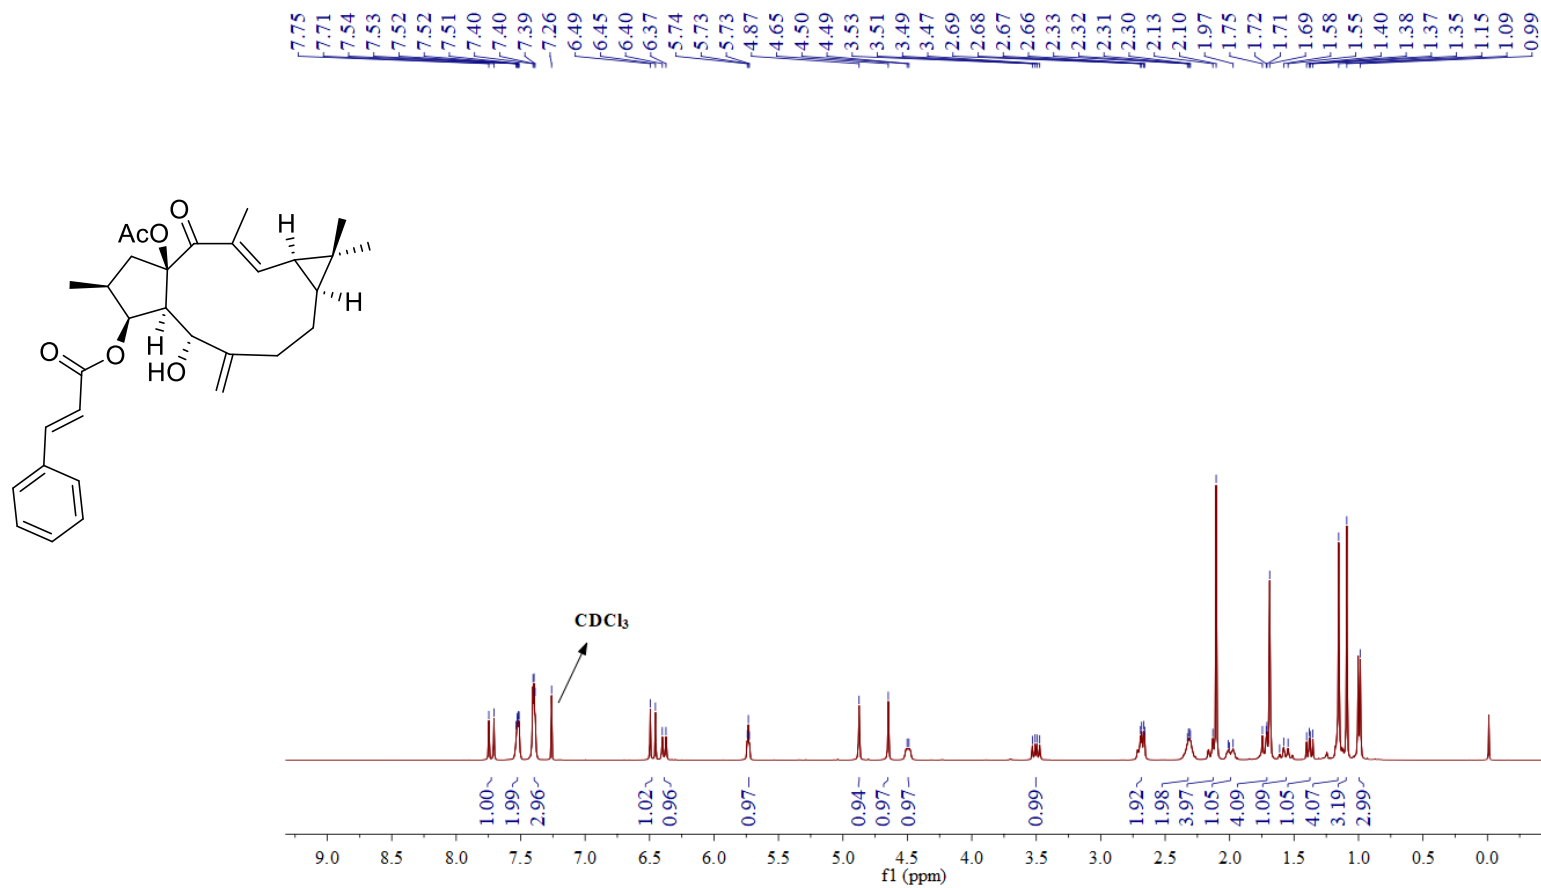

Figure S131.  $^{13}\text{C}$  NMR and DEPT 135 spectra of **13** in  $\text{CDCl}_3$ .

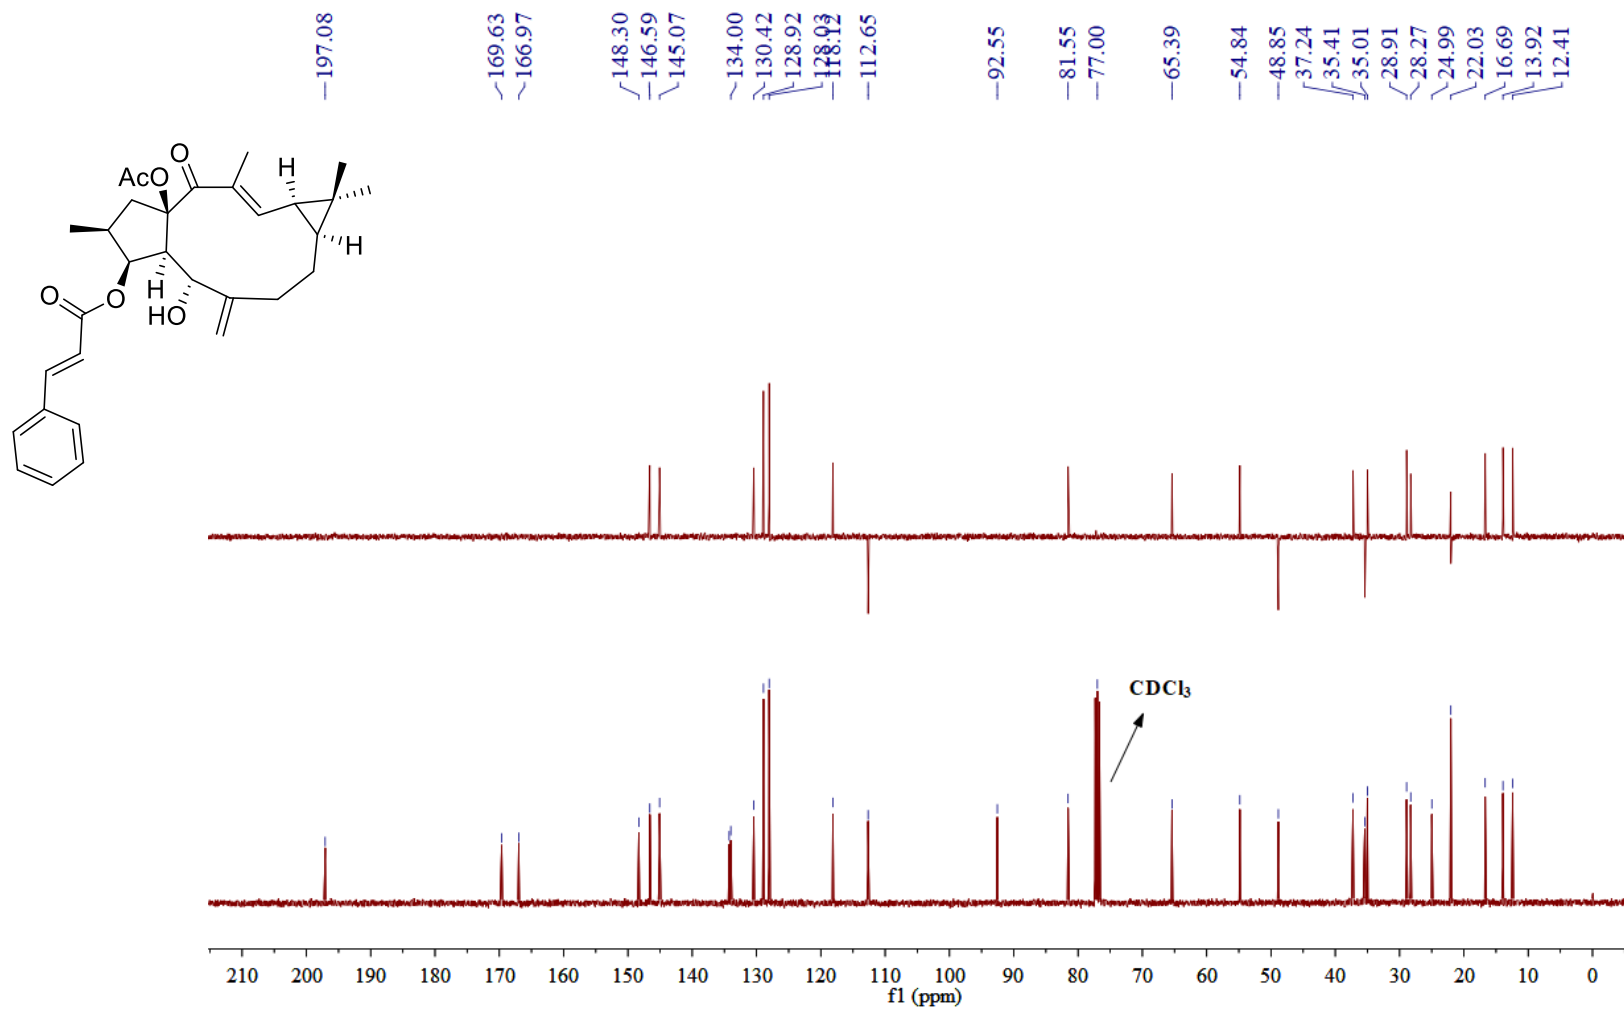

Figure S132. <sup>1</sup>H NMR spectrum of **14** in CDCl<sub>3</sub>.

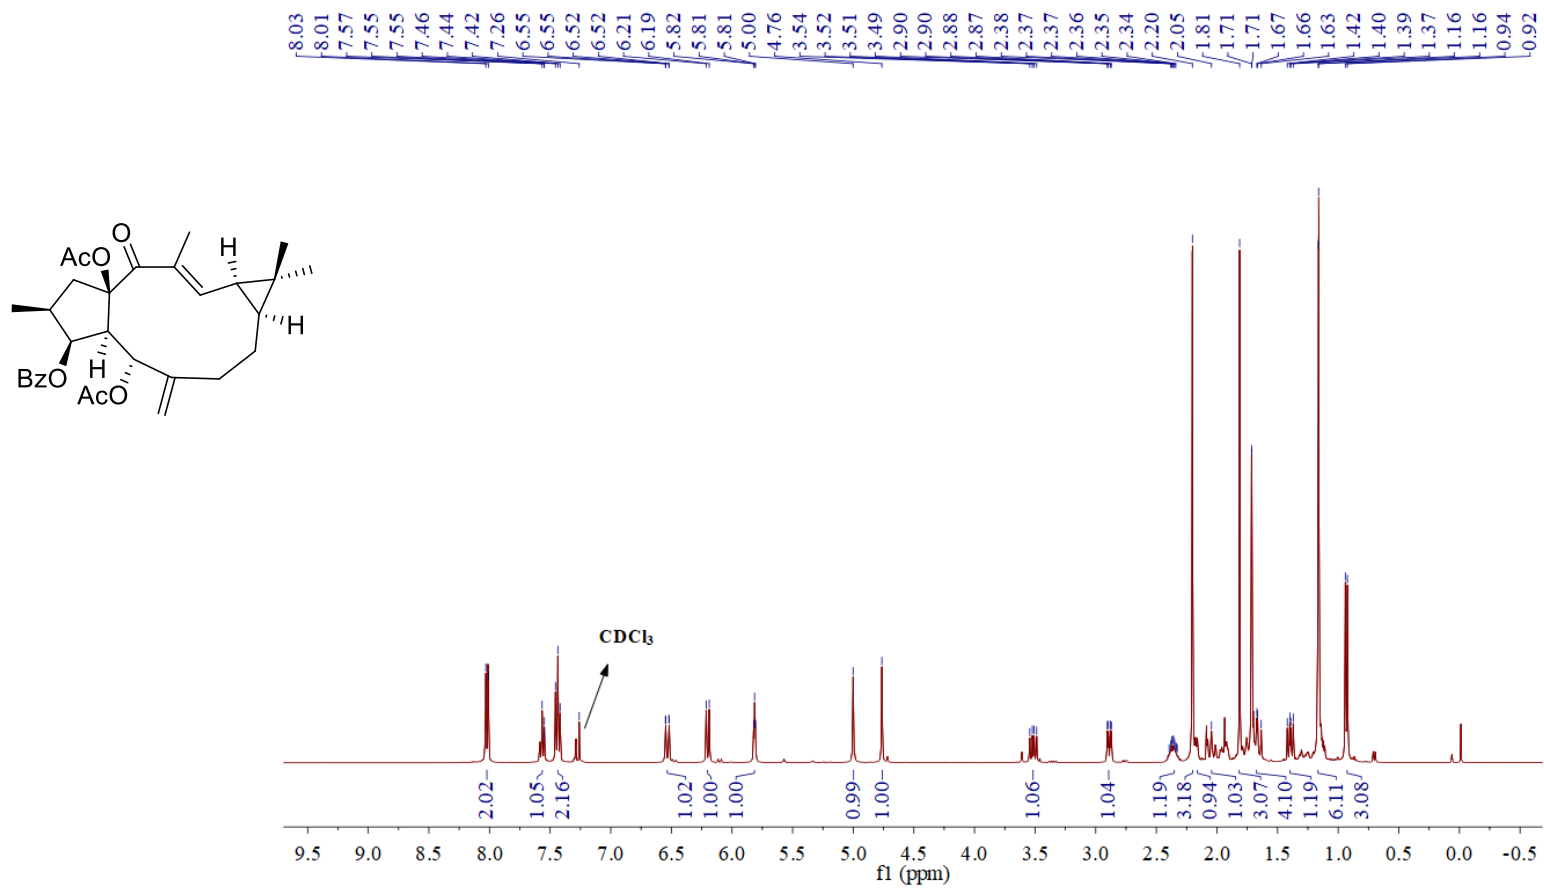

Figure S133.  $^{13}\text{C}$  NMR and DEPT 135 spectra of **14** in  $\text{CDCl}_3$ .

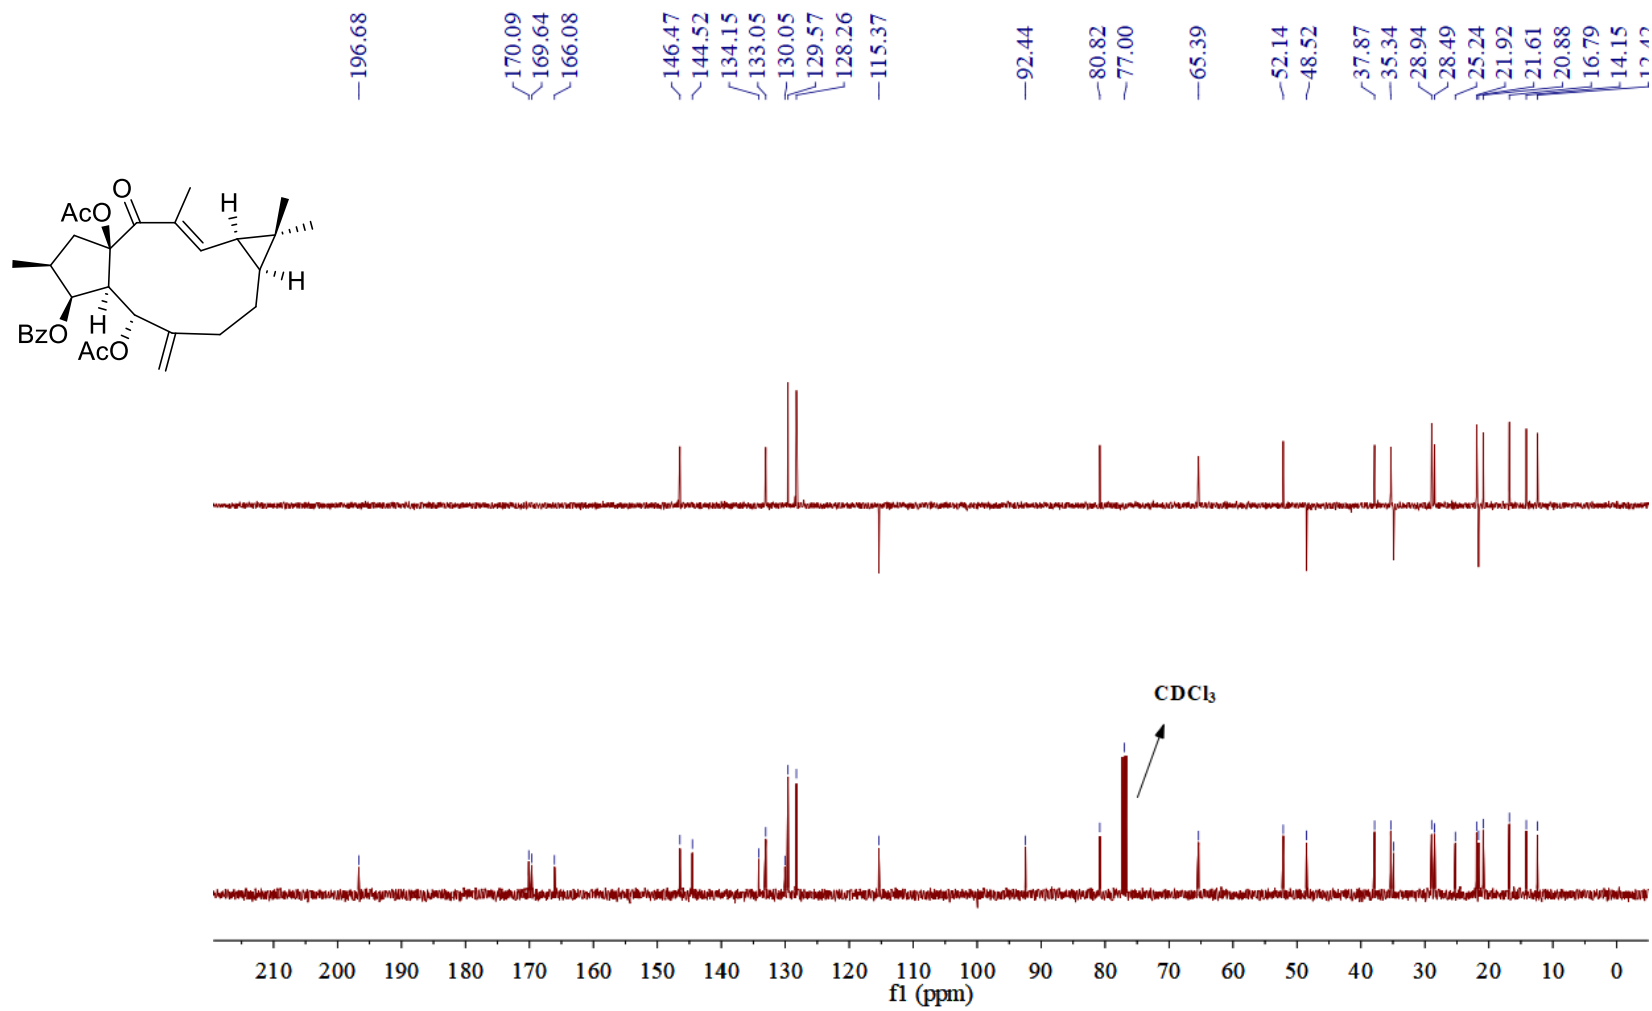

Figure S134.  $^1\text{H}$  NMR spectrum of **15** in  $\text{CDCl}_3$ .

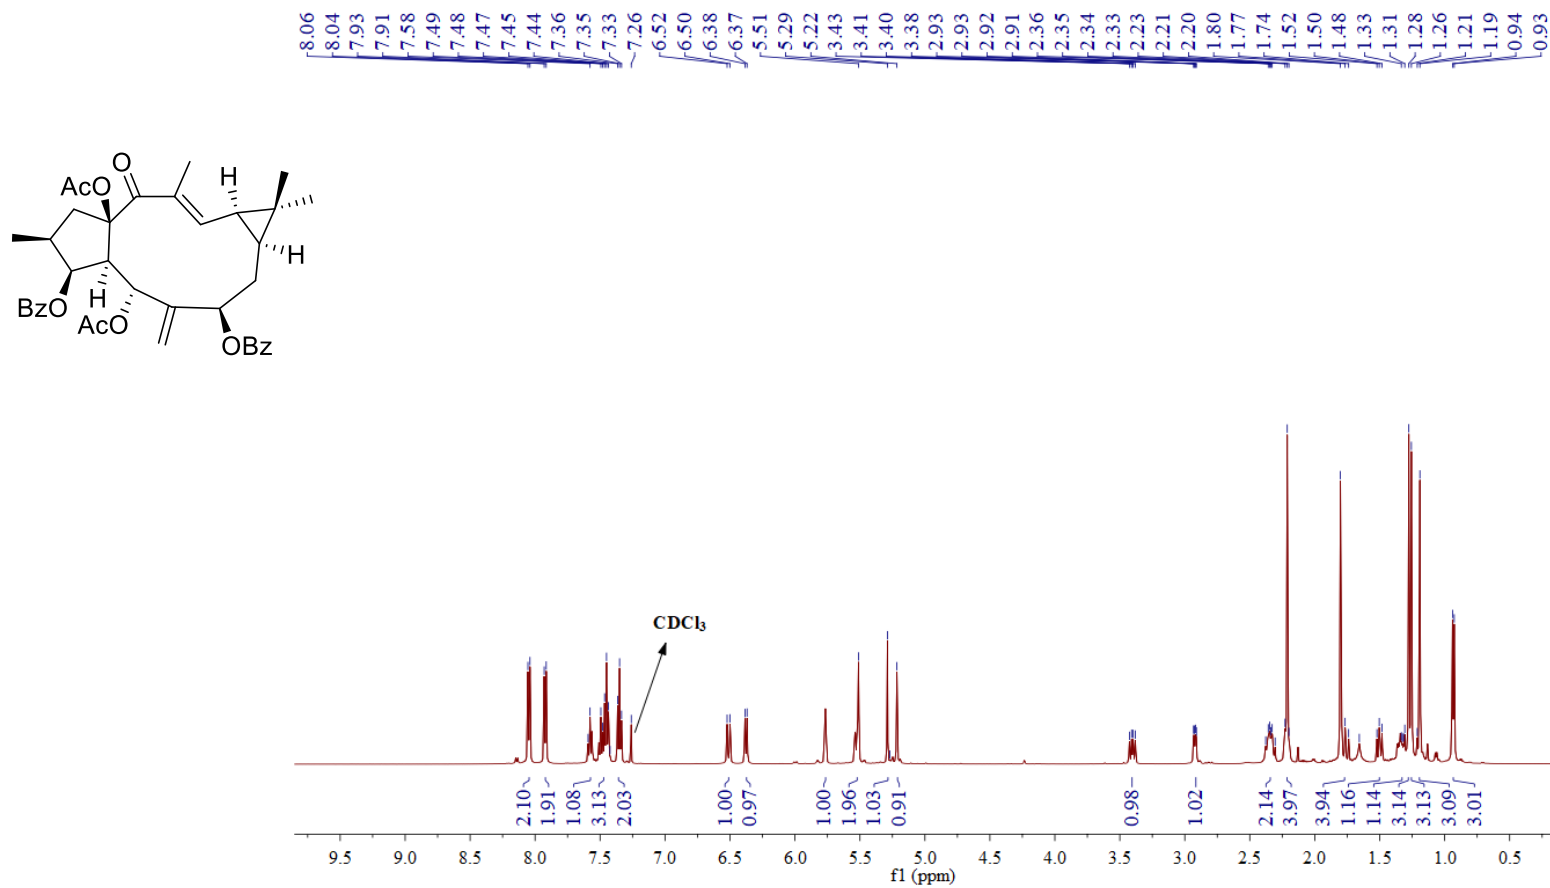



Figure S135.  $^{13}\text{C}$  NMR and DEPT 135 spectra of **15** in  $\text{CDCl}_3$ .

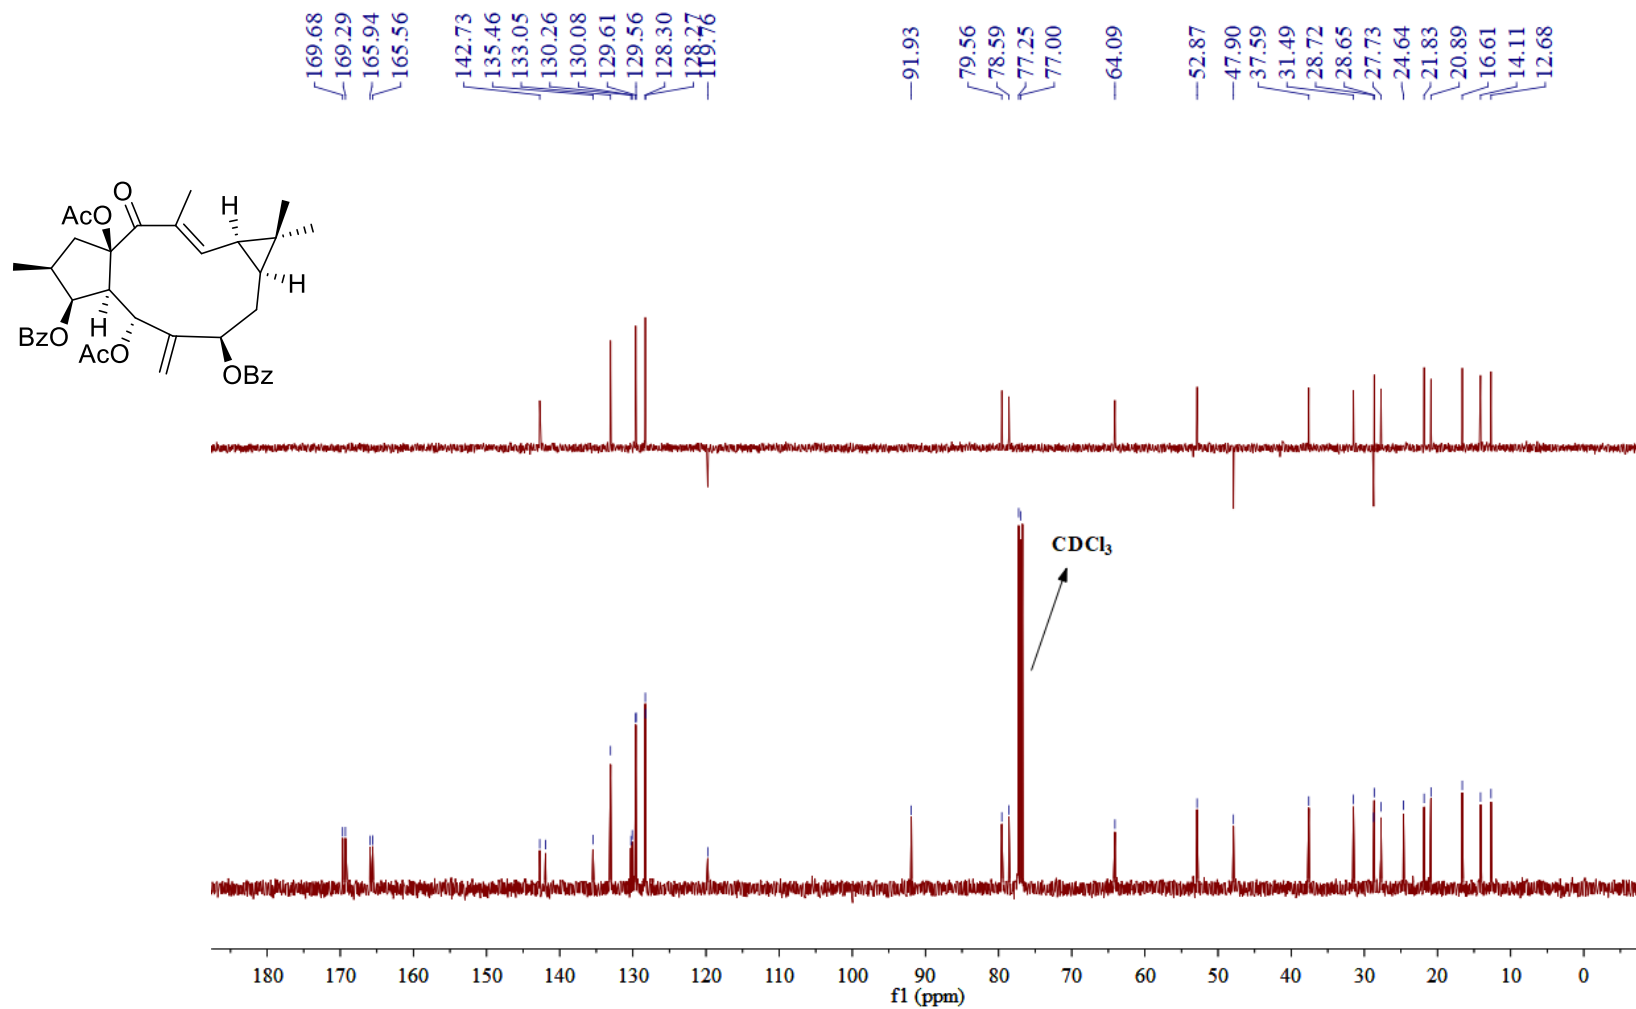

Figure S136. <sup>1</sup>H NMR spectrum of **16** in CDCl<sub>3</sub>.

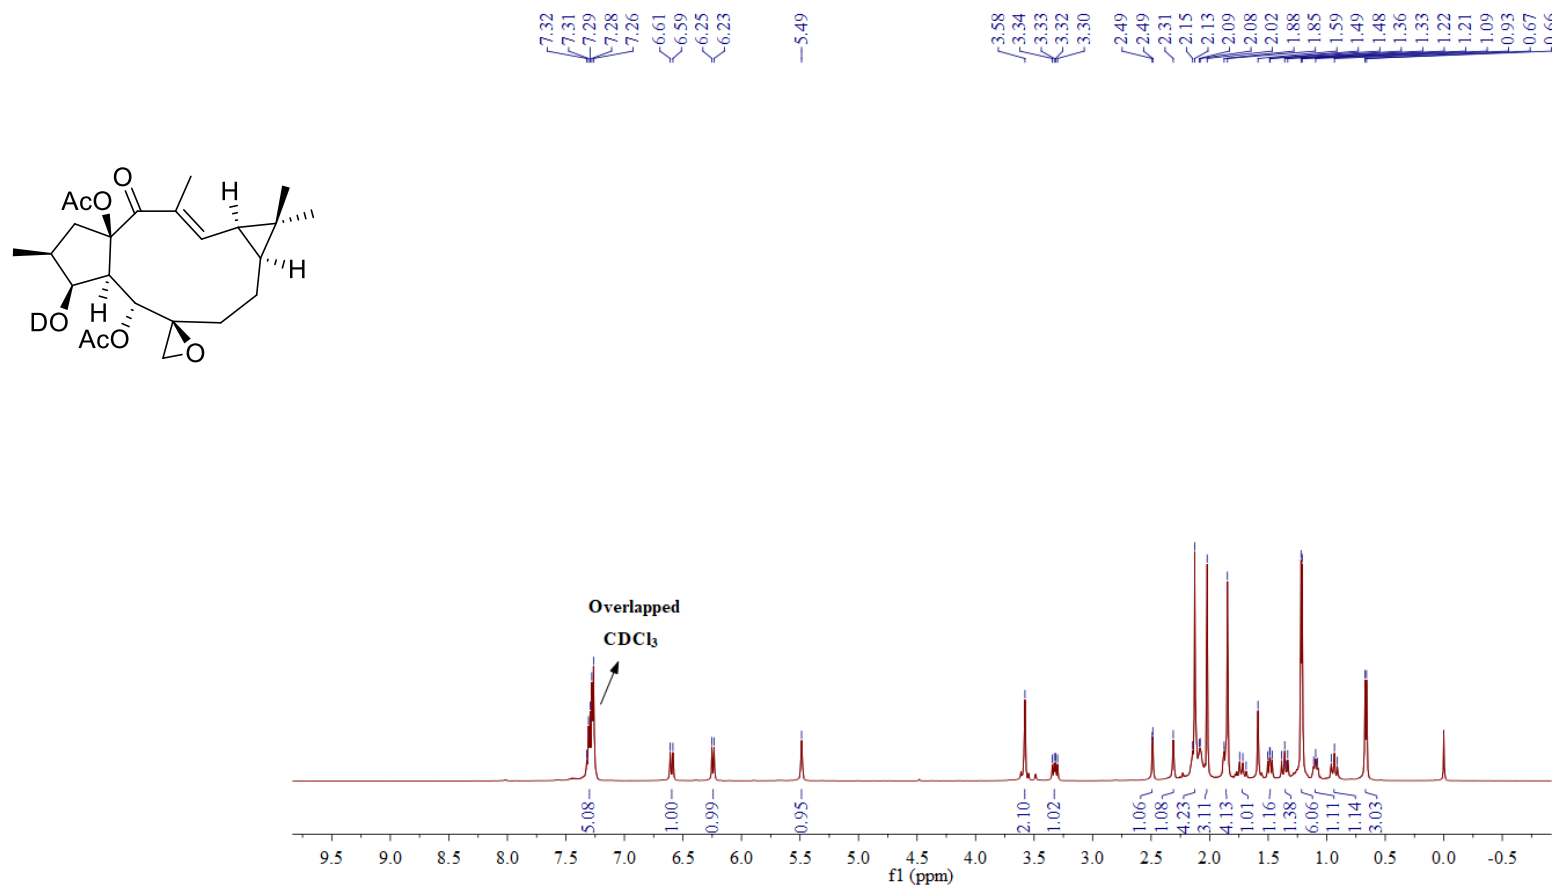



Figure S138.  $^1\text{H}$  spectrum of **17** in  $\text{CDCl}_3$ .

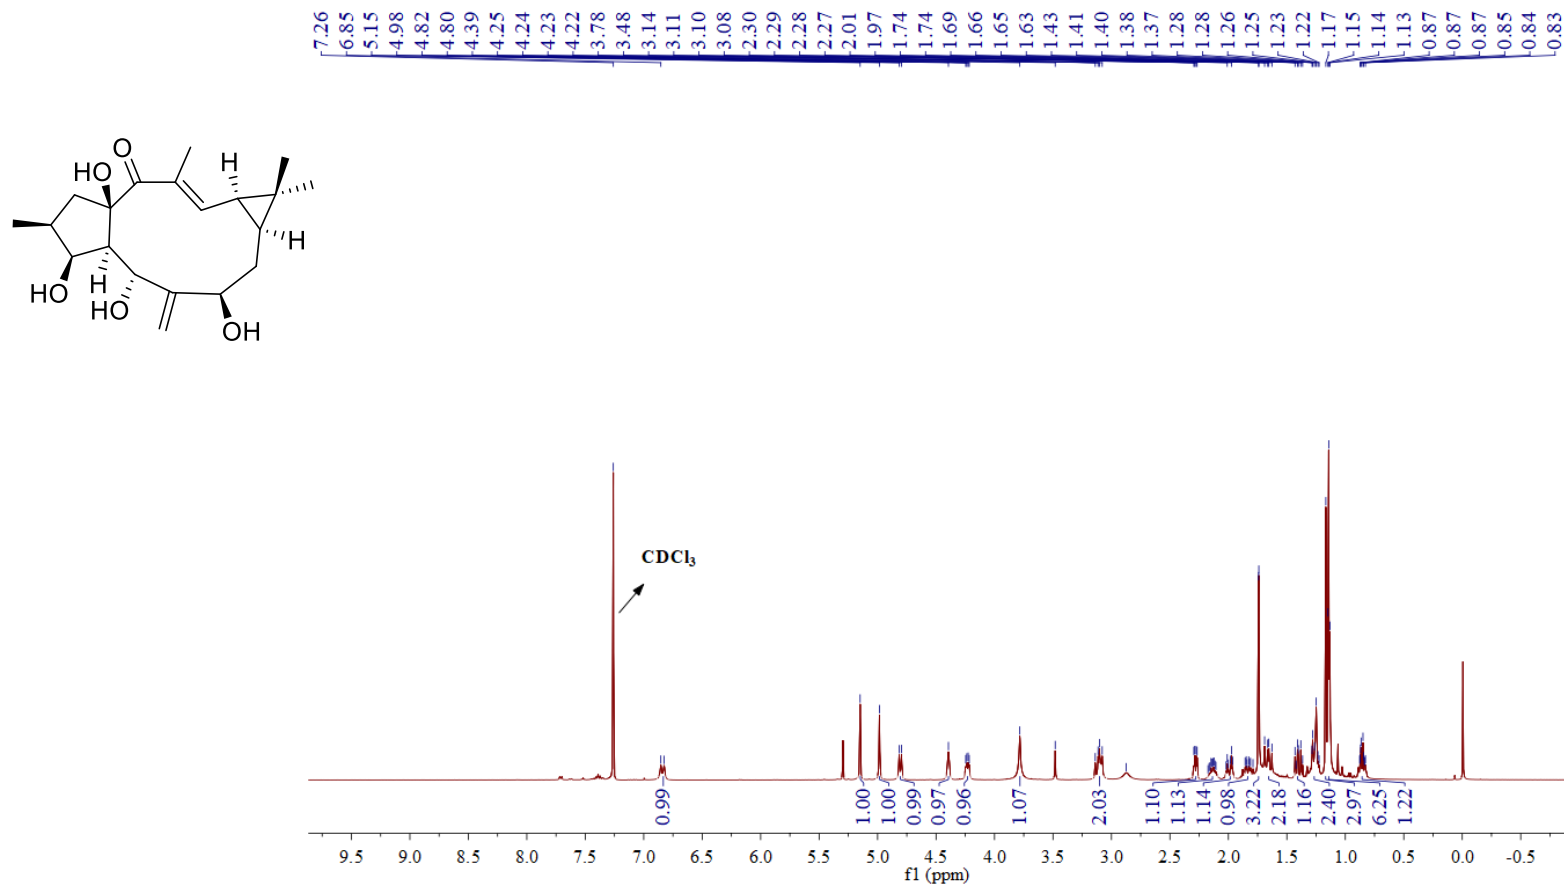

Figure S139.  $^{13}\text{C}$  NMR and DEPT 135 spectra of **17** in  $\text{CDCl}_3$ .

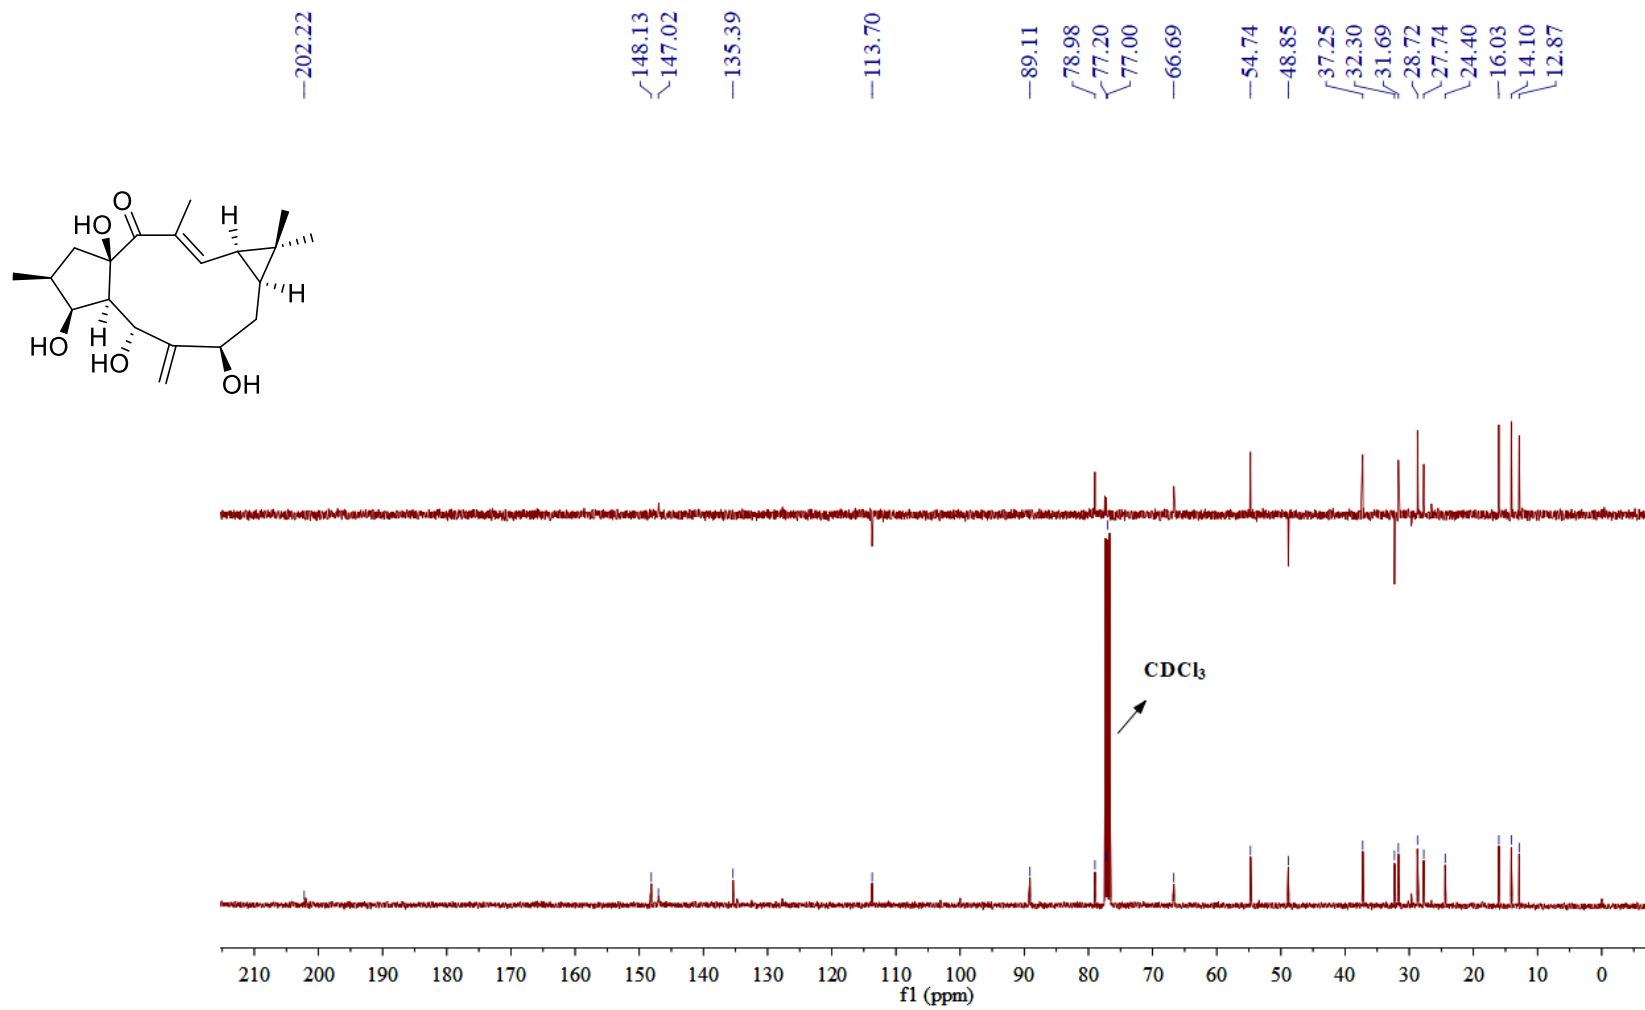

Figure S140.  $^1\text{H}$  spectrum of **18** in  $\text{CDCl}_3$ .

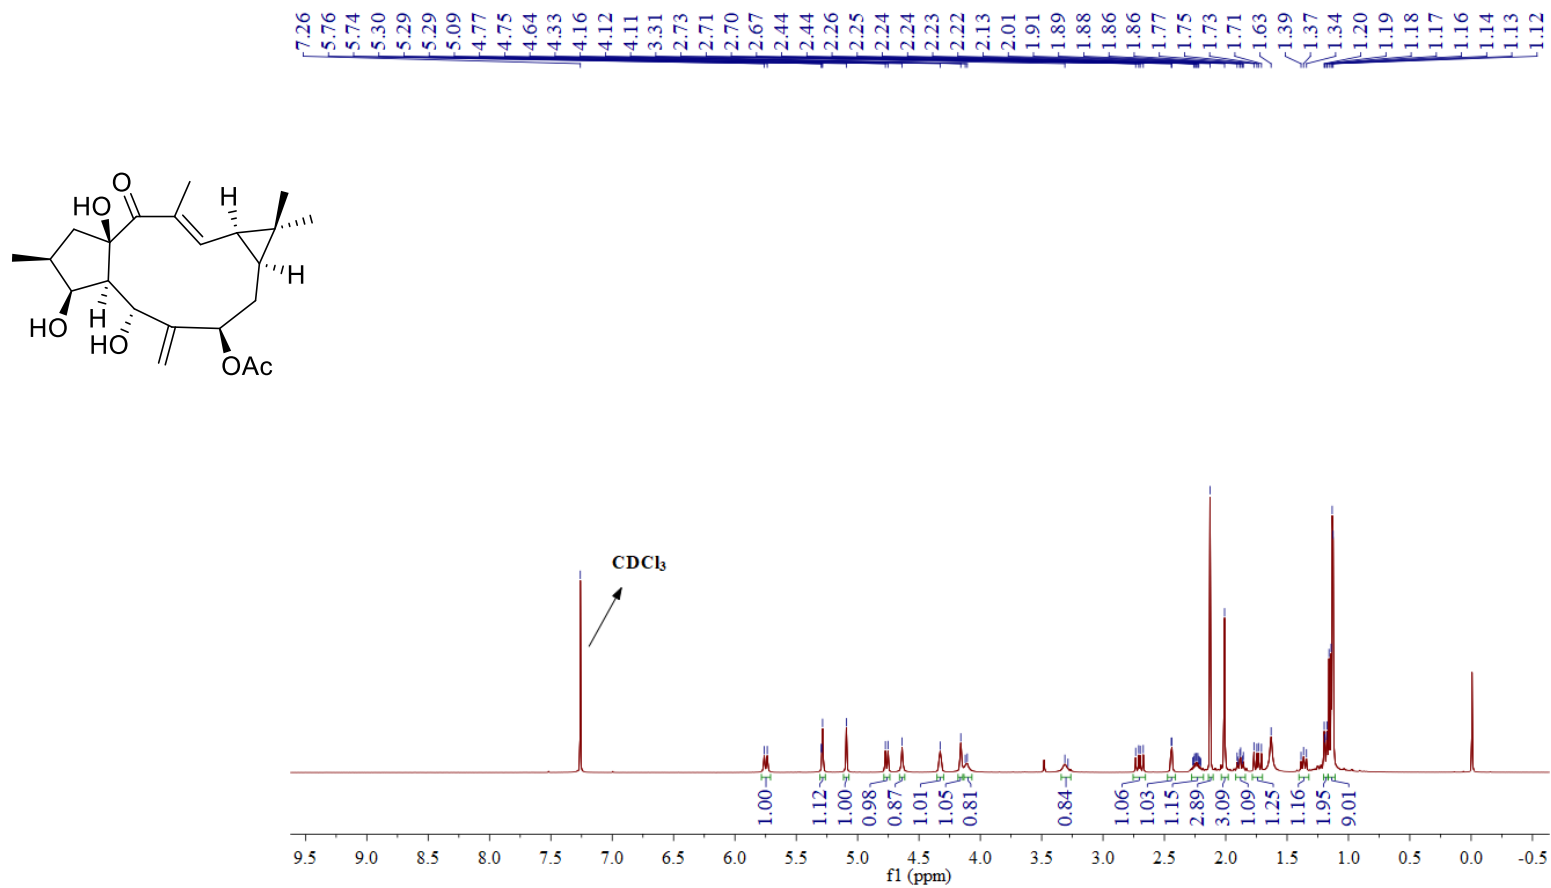

Figure S141.  $^{13}\text{C}$  NMR and DEPT 135 spectra of **18** in  $\text{CDCl}_3$ .

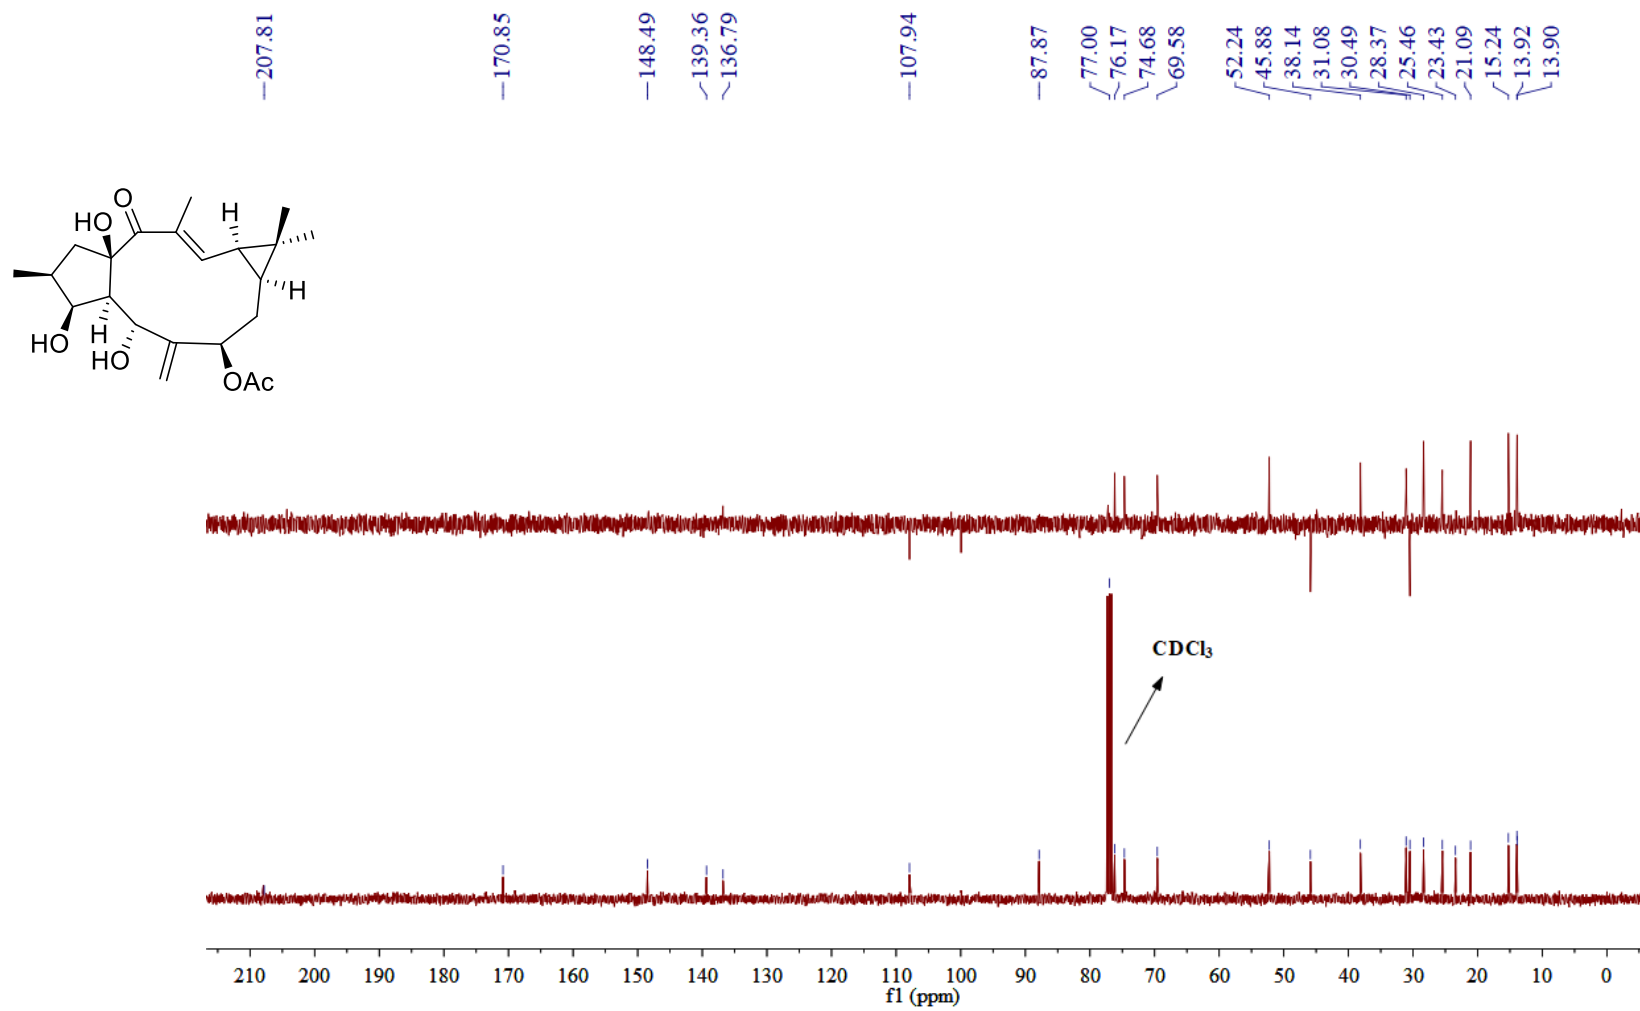

Figure S142.  $^1\text{H}$  spectrum of **19** in  $\text{CDCl}_3$ .

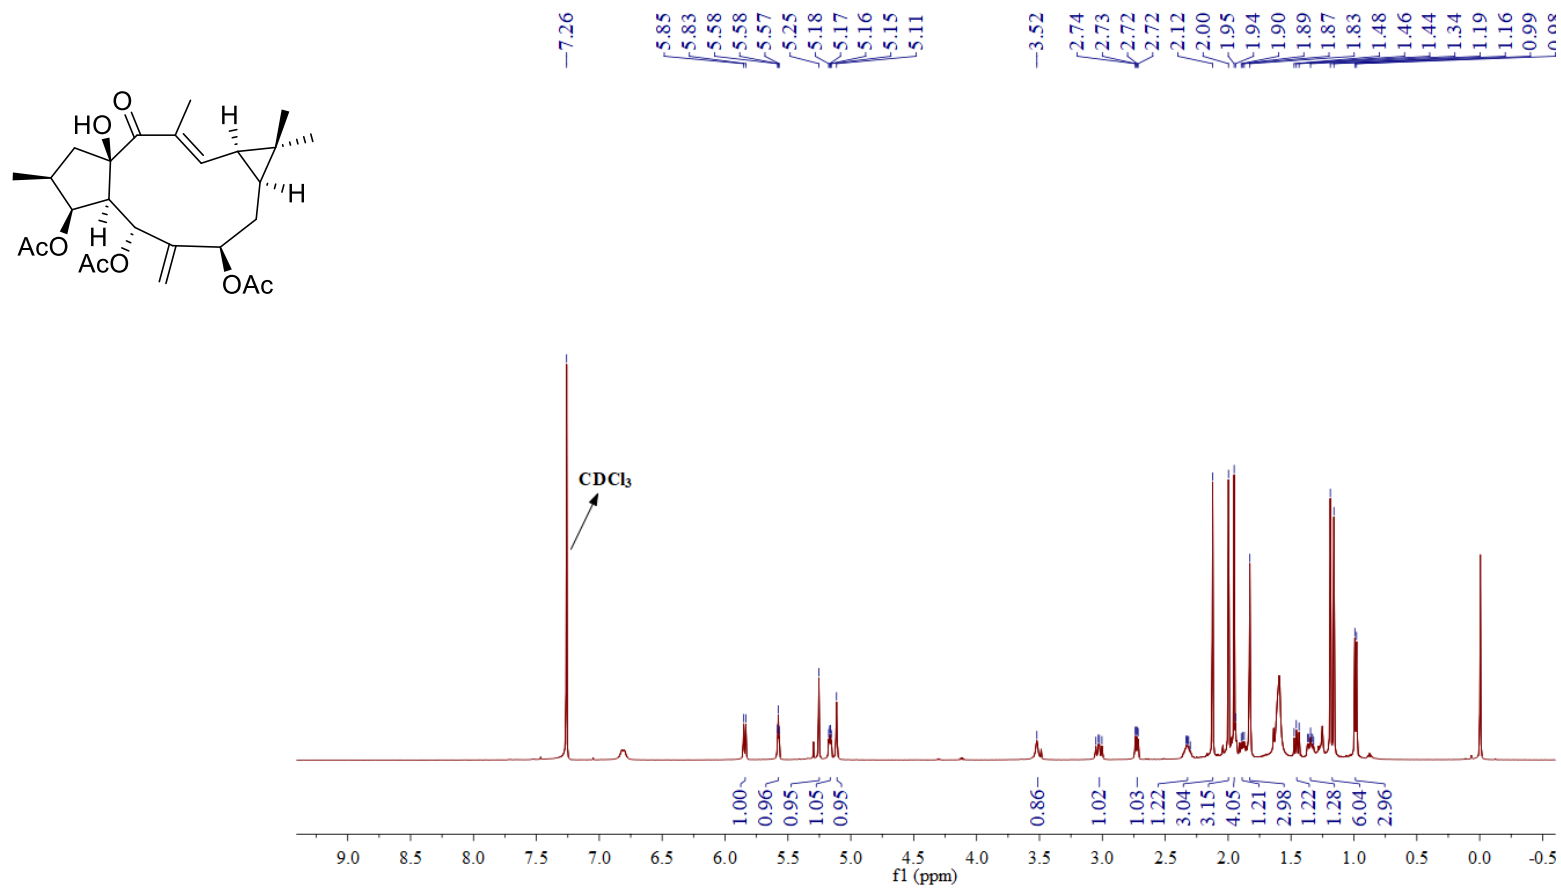



Figure S143.  $^{13}\text{C}$  NMR spectrum of **19** in  $\text{CDCl}_3$ .

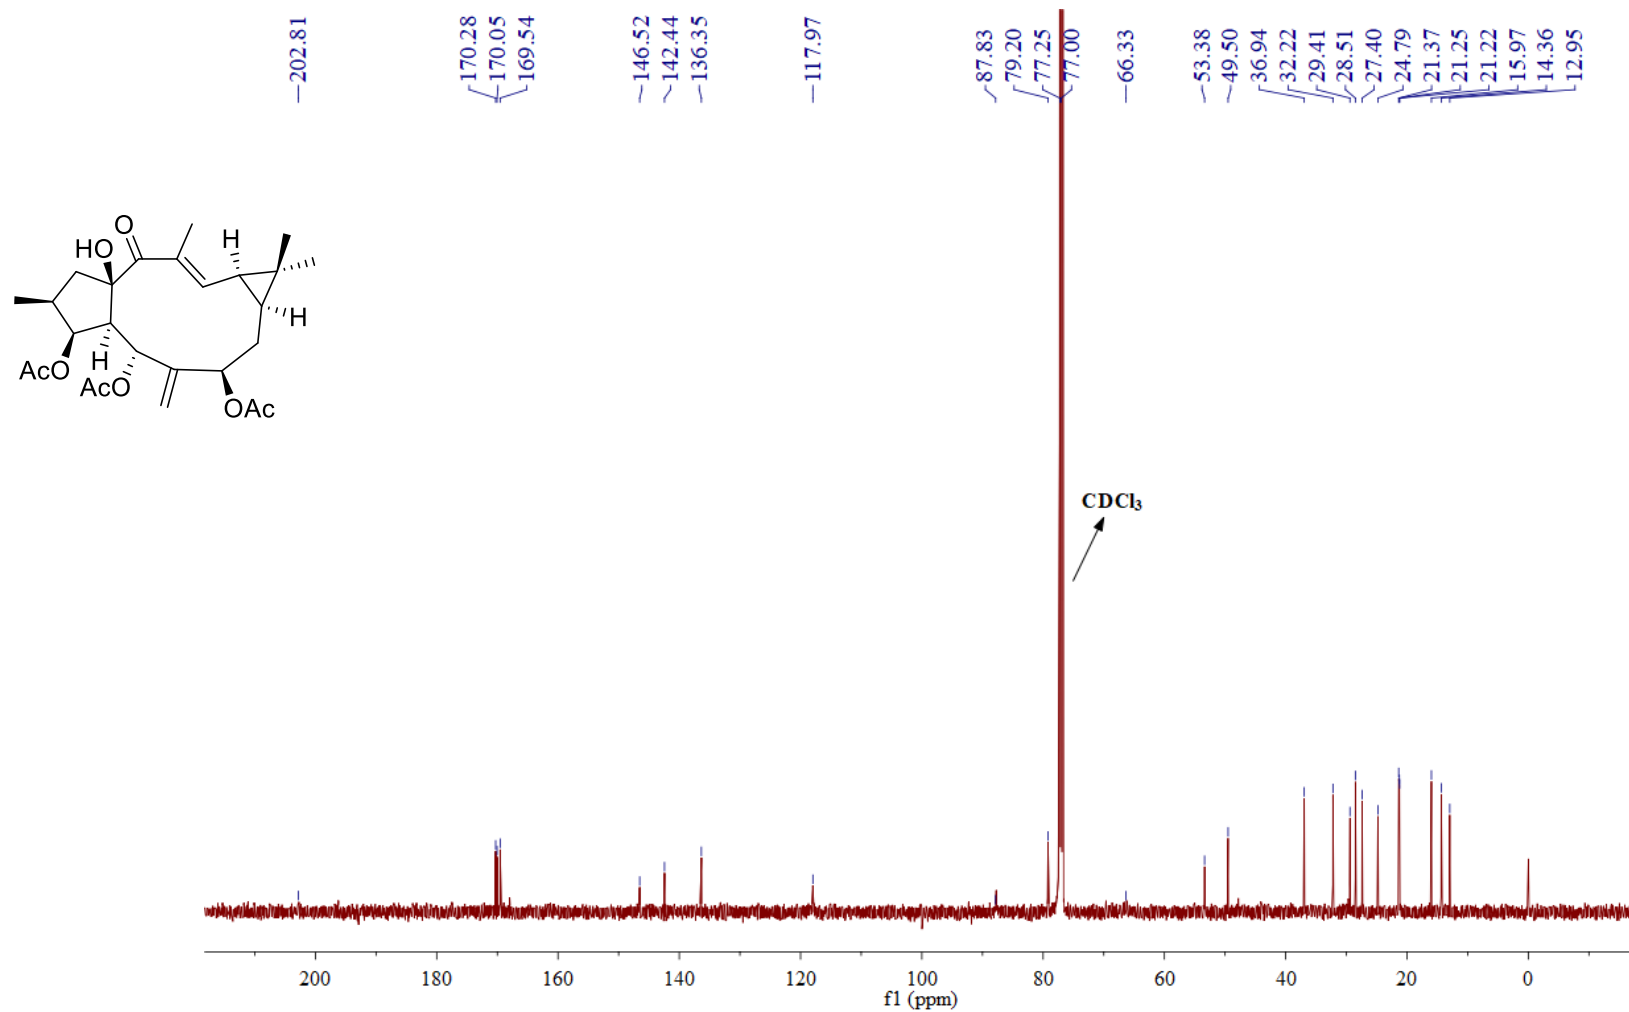

Figure S144. <sup>1</sup>H spectrum of **27** in CDCl<sub>3</sub>.

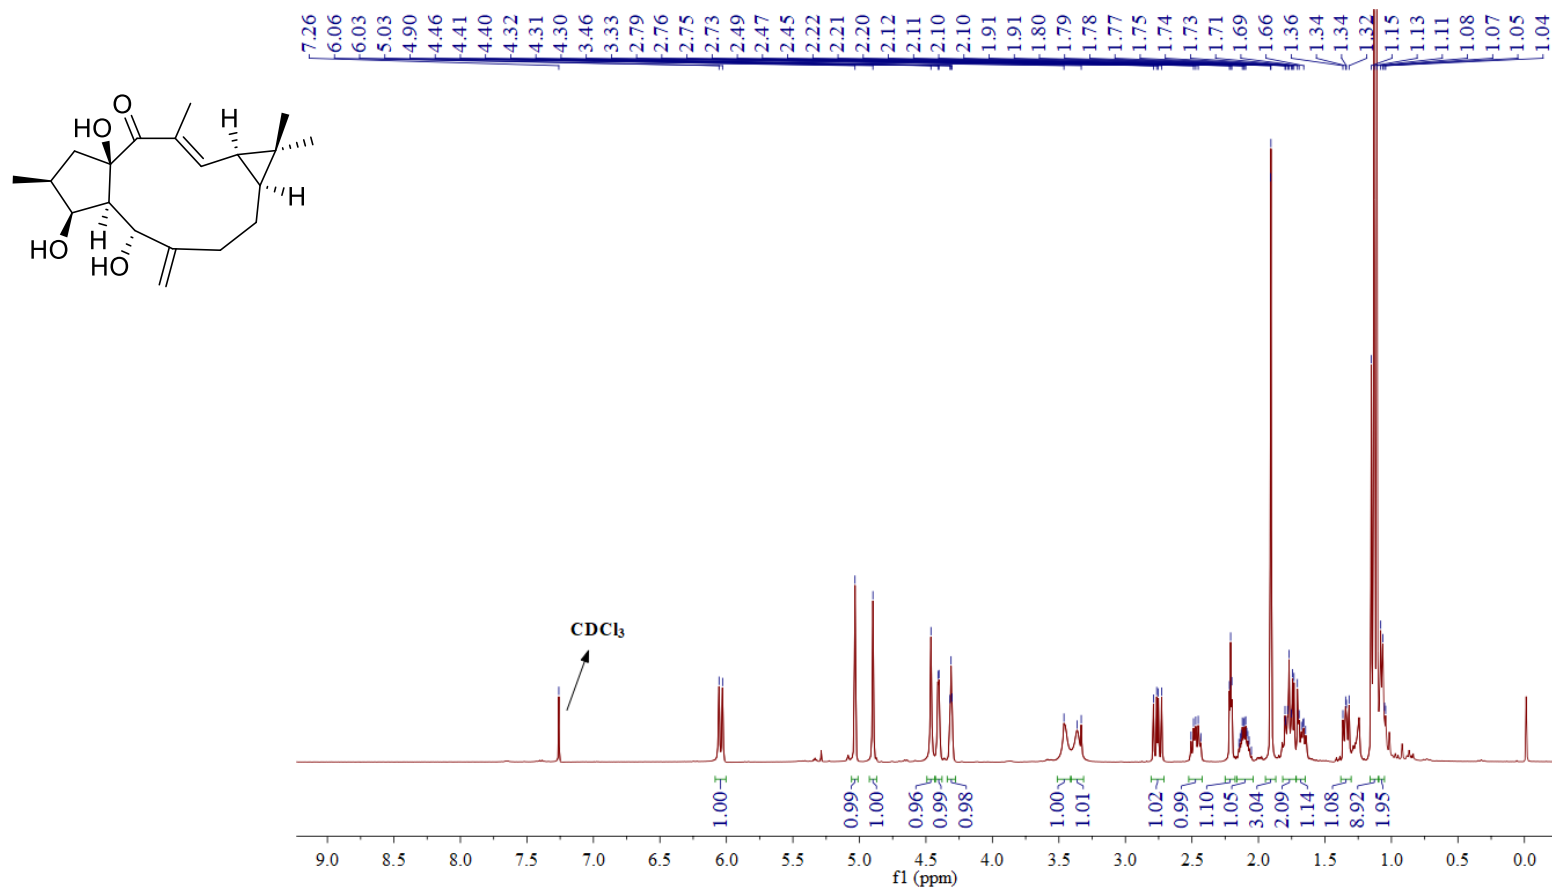

Figure S145.  $^{13}\text{C}$  NMR and DEPT 135 spectra of **27** in  $\text{CDCl}_3$ .

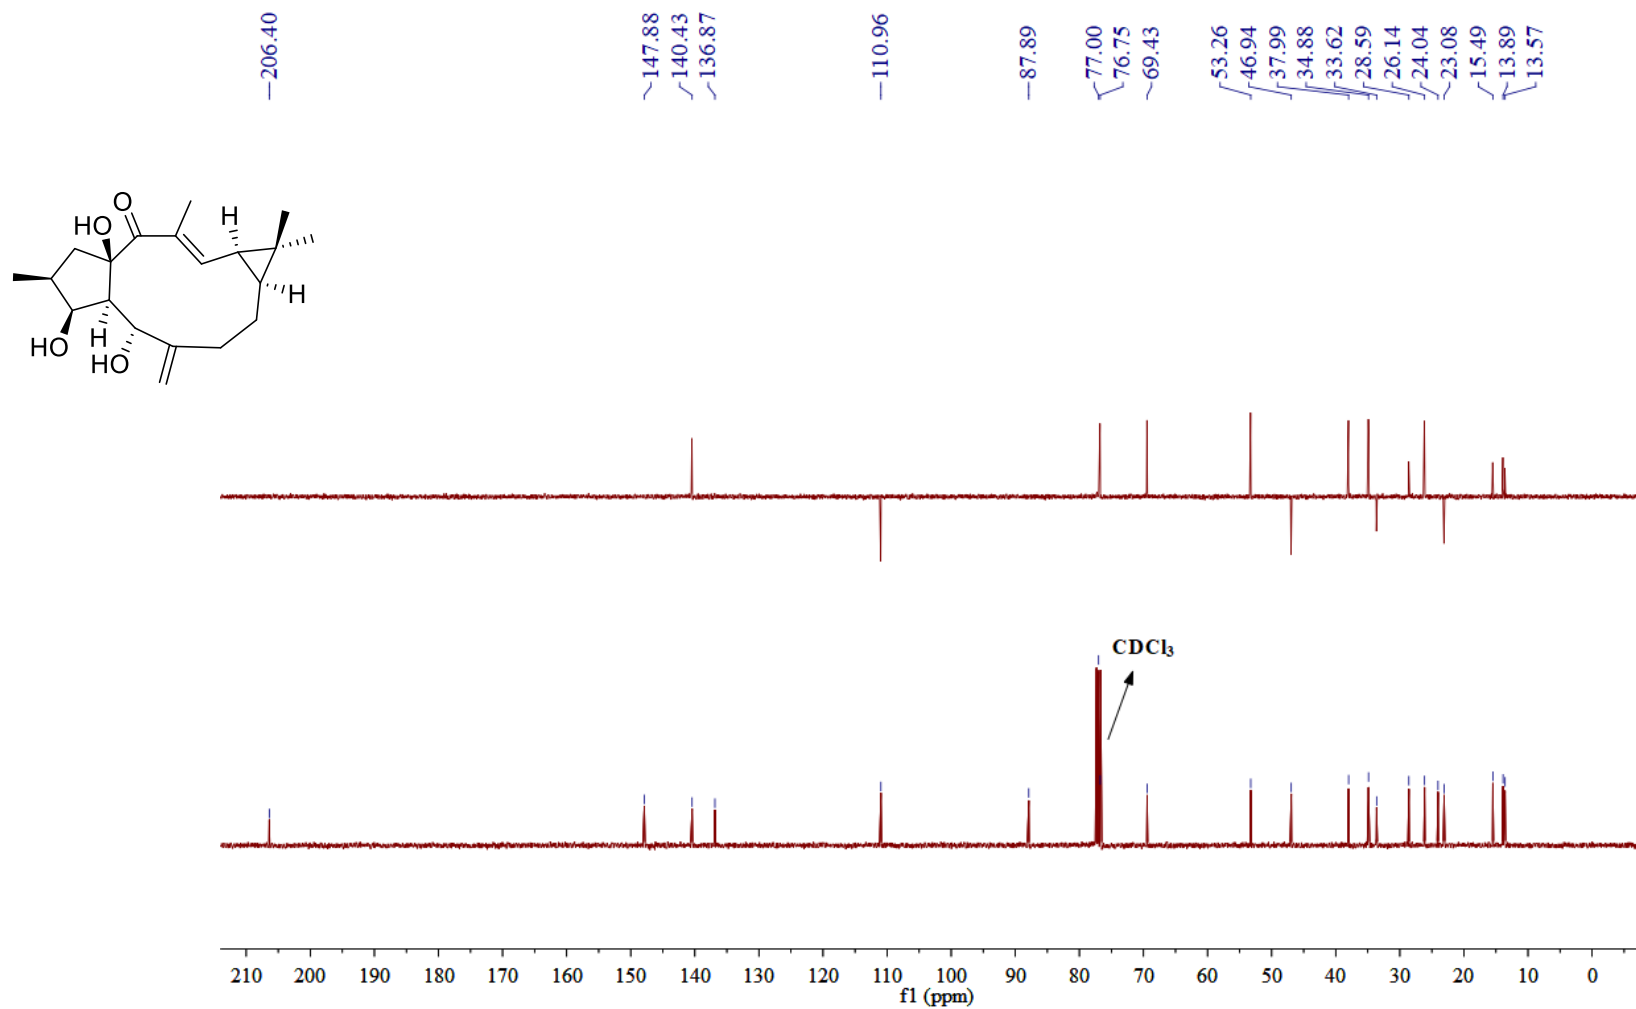

## 12. Figure S146–S164.

Figure S146. HRESIMS spectrum of **1**.

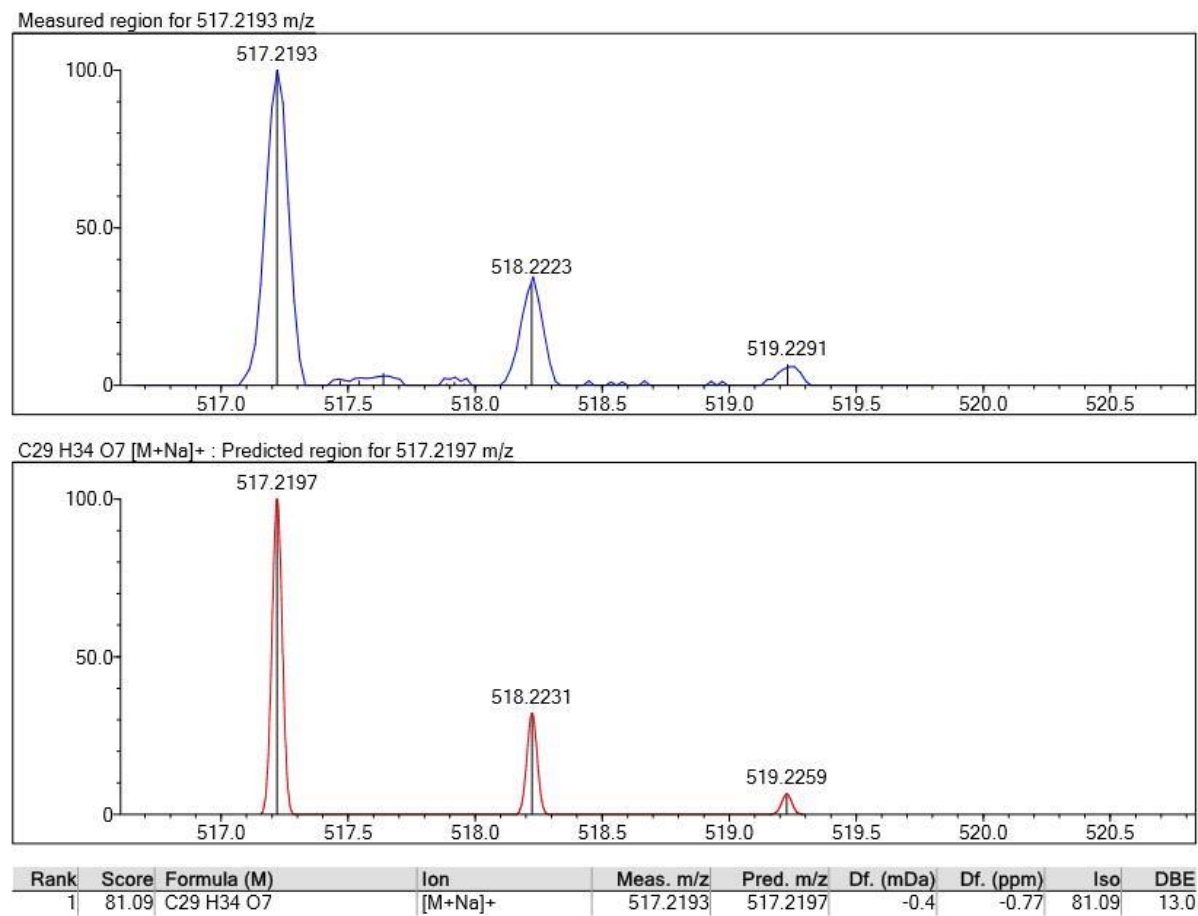

Figure S147. HRESIMS spectrum of **2**.

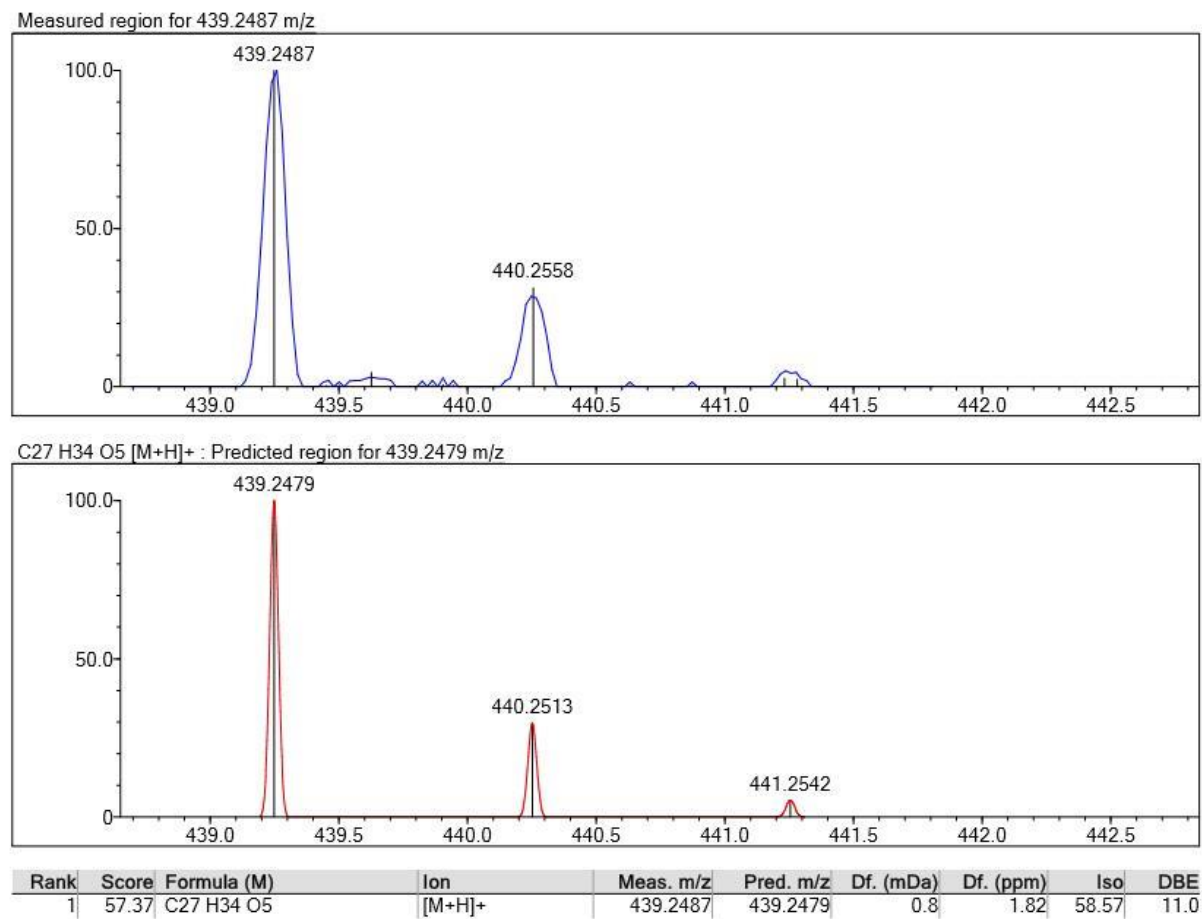

Figure S148. HRESIMS spectrum of 3.

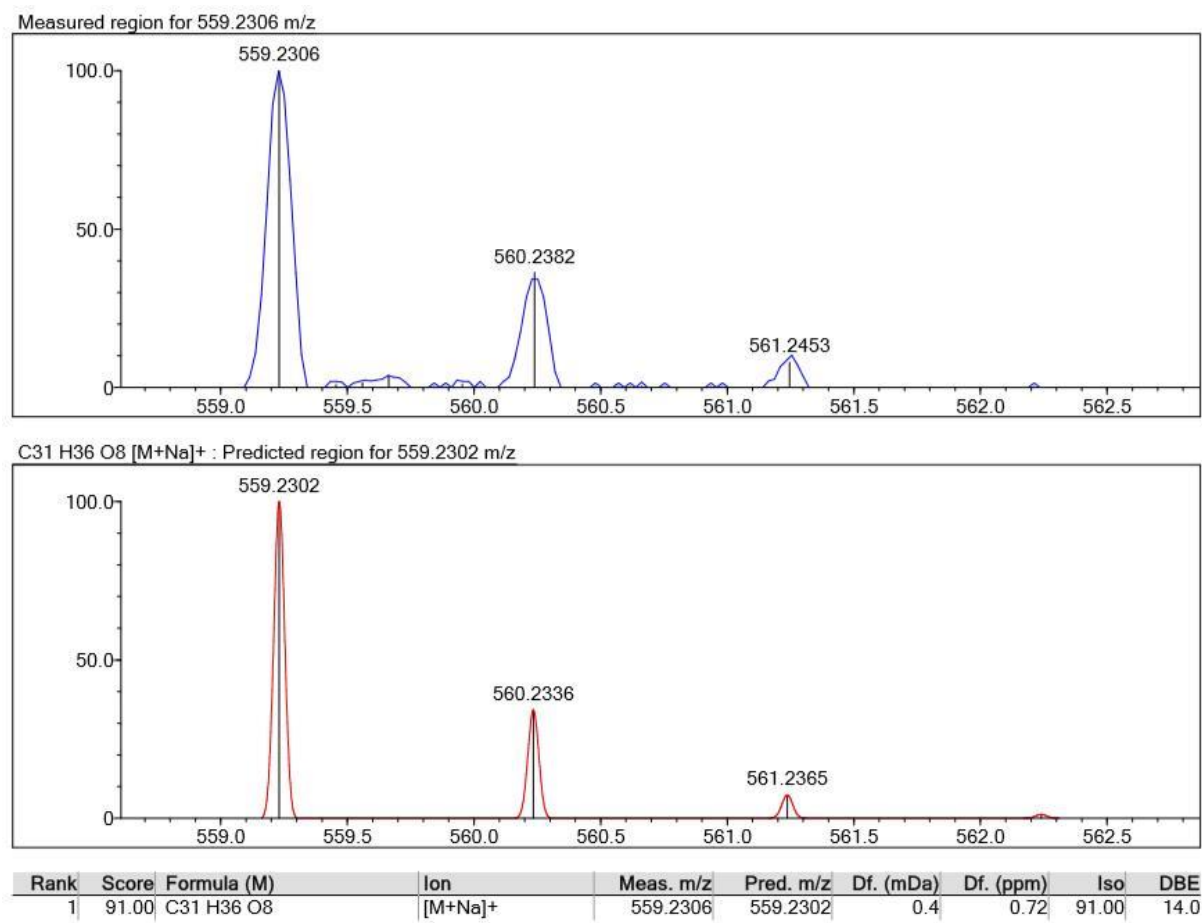

Figure S149. HRESIMS spectrum of 4.

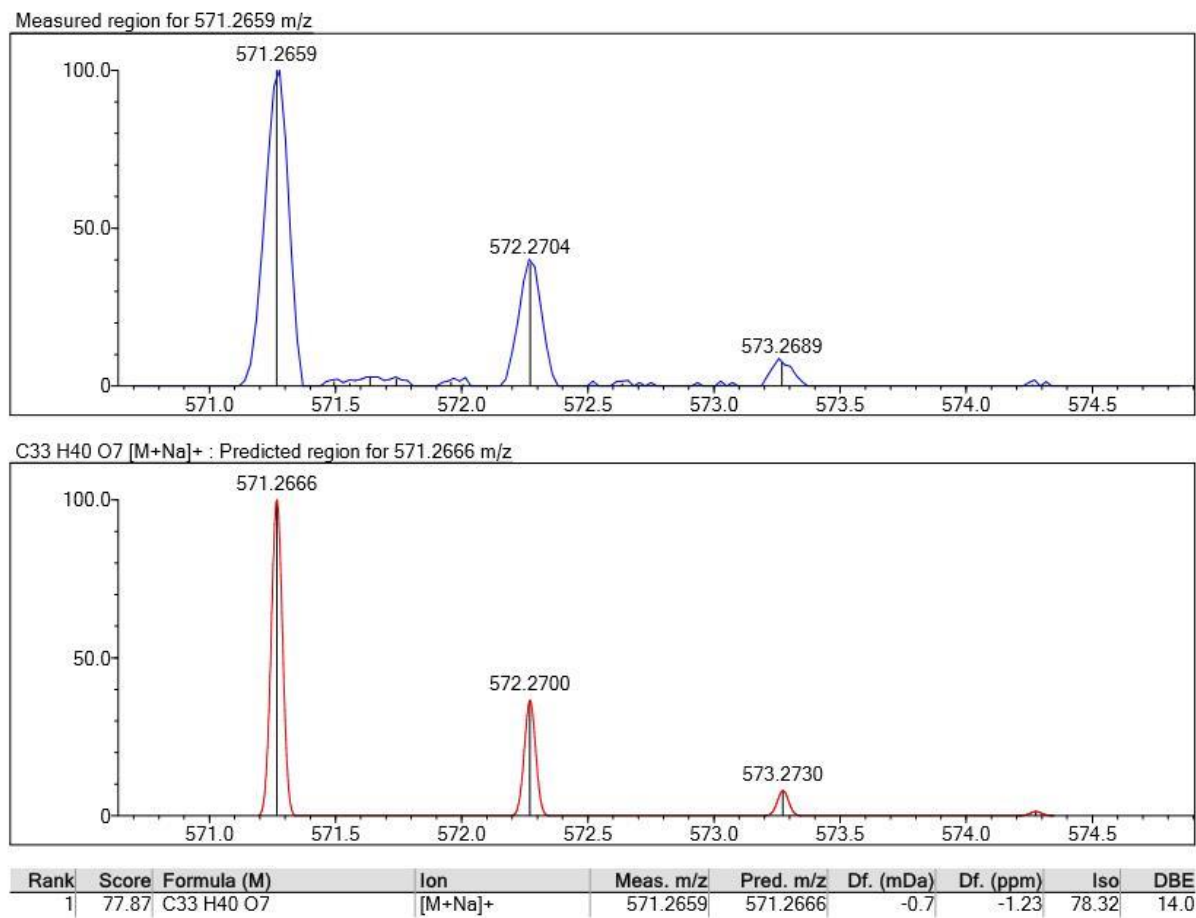

**Figure S150.** HRESIMS spectrum of **5**.

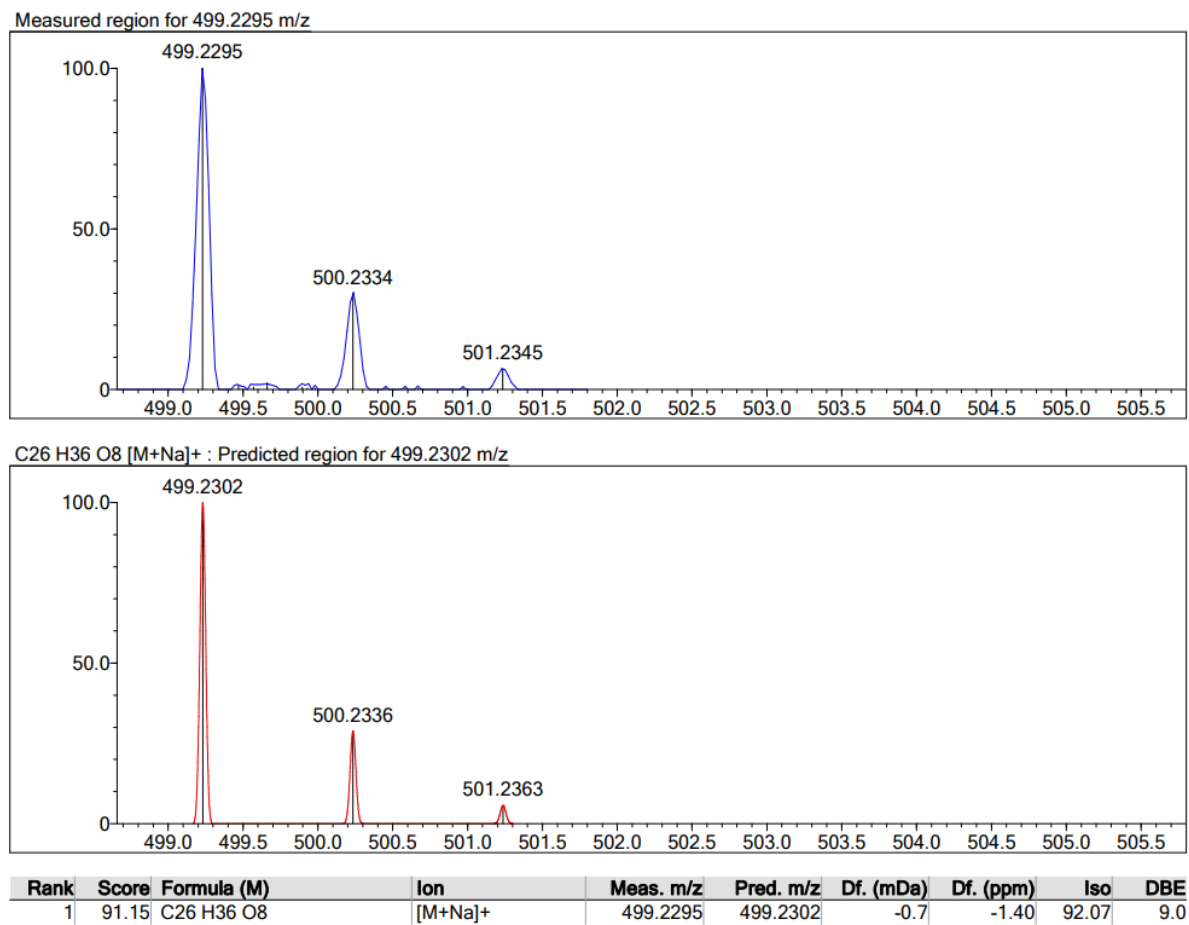



**Figure S151.** HRESIMS spectrum of **20**.

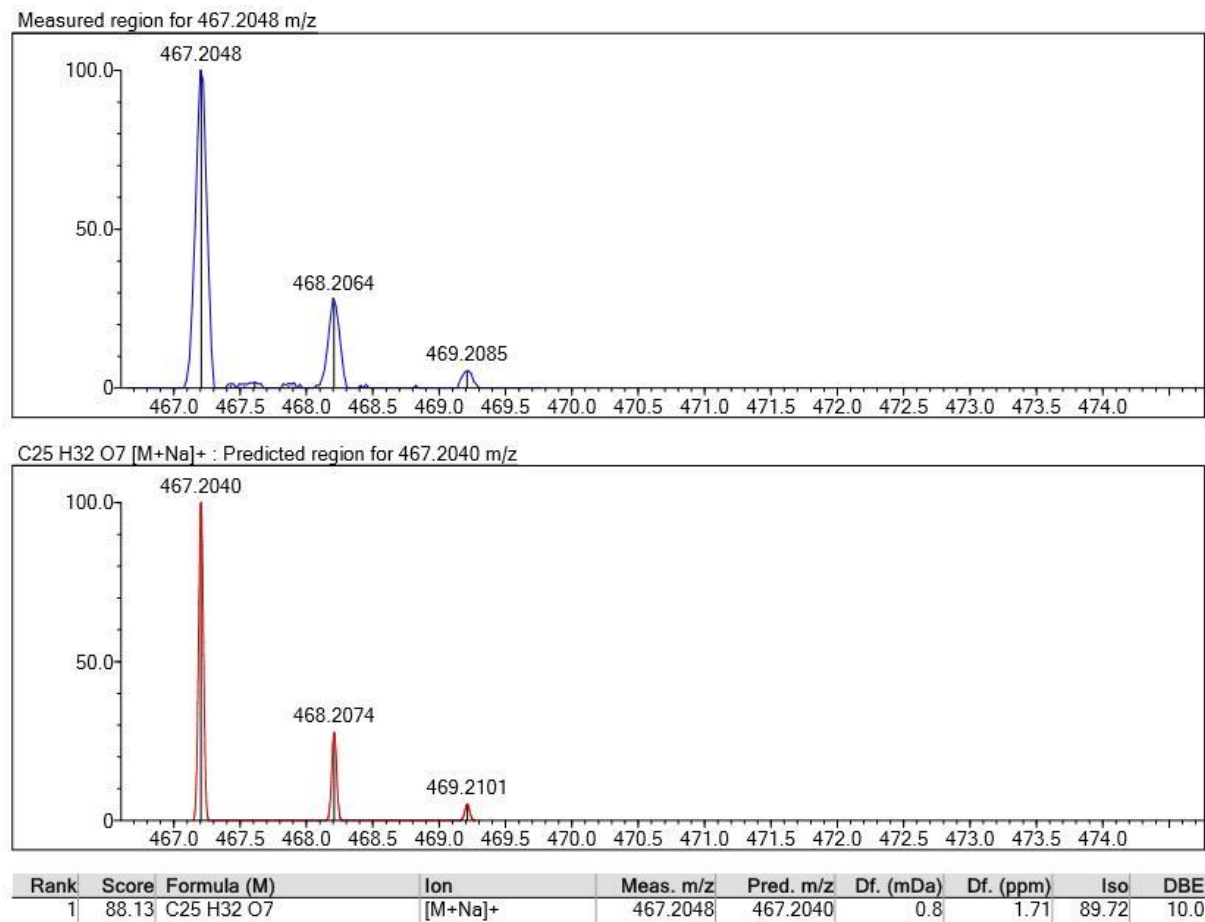

**Figure S152.** HRESIMS spectrum of **21**.

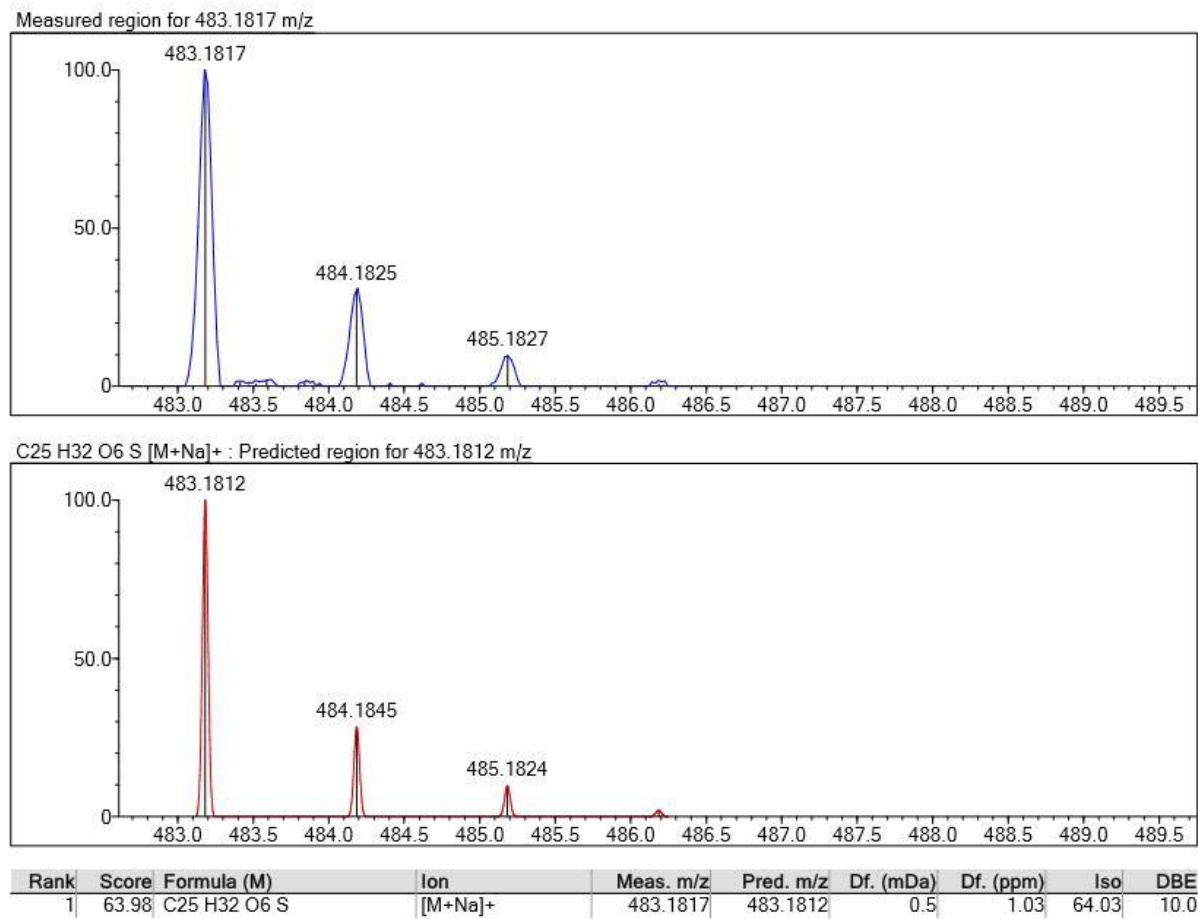

**Figure S153.** HRESIMS spectrum of **22**.

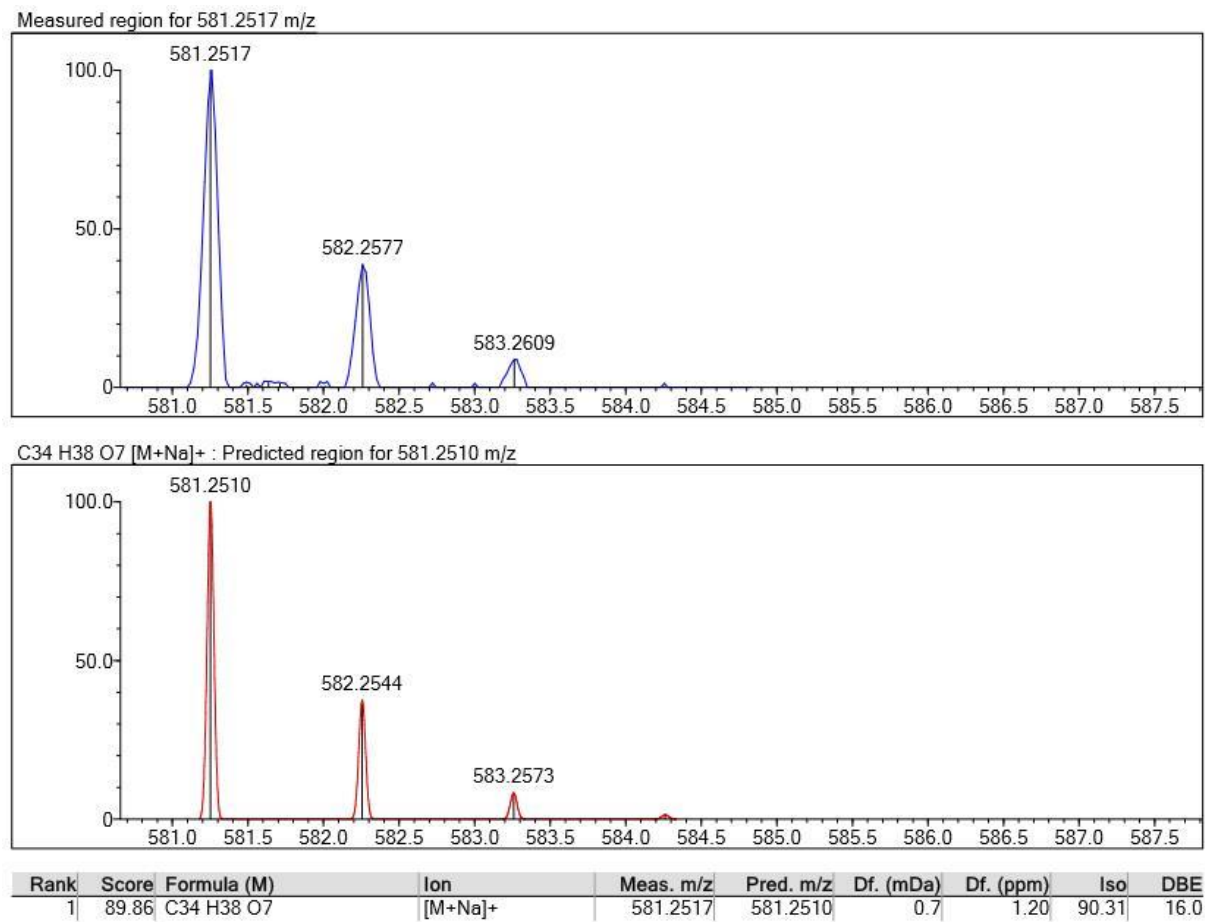

**Figure S154.** HRESIMS spectrum of **23**.

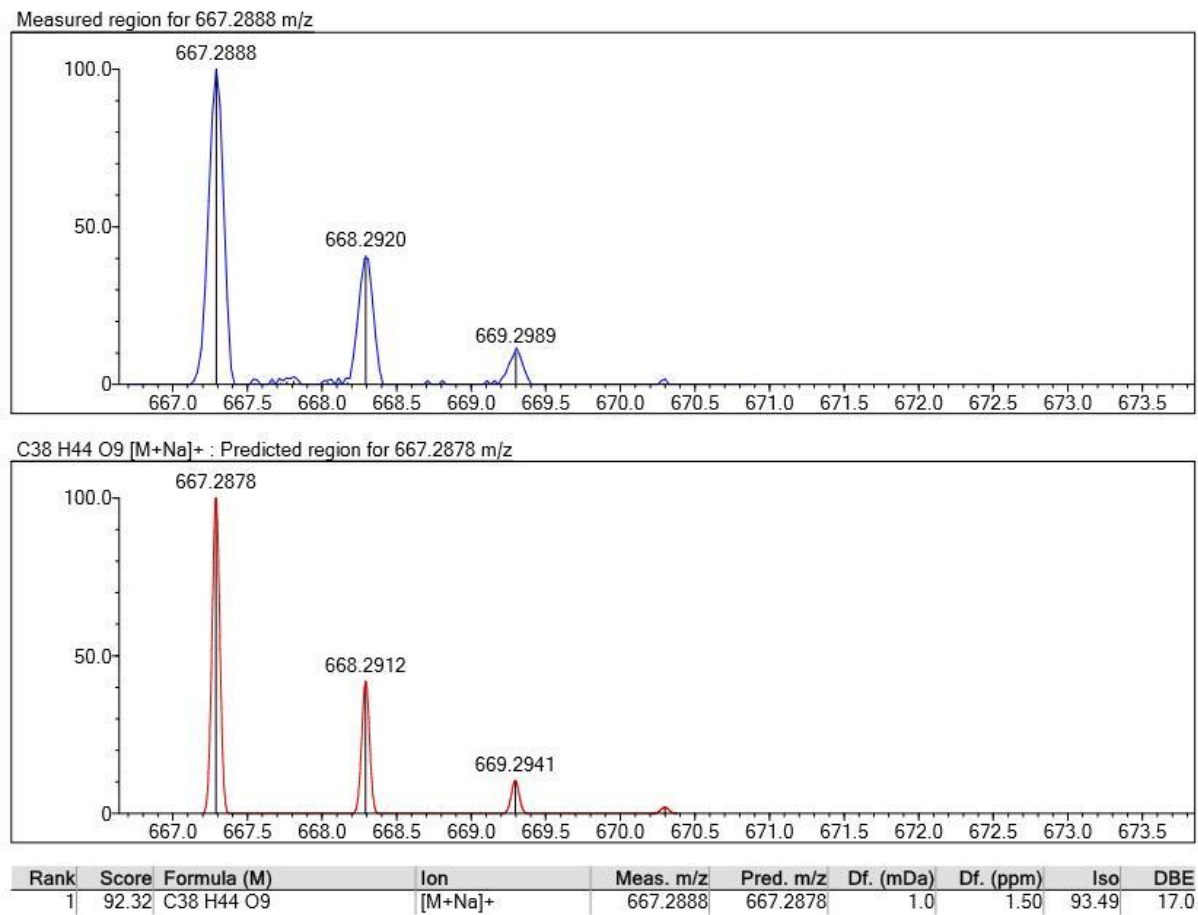

Figure S155. HRESIMS spectrum of **24**.

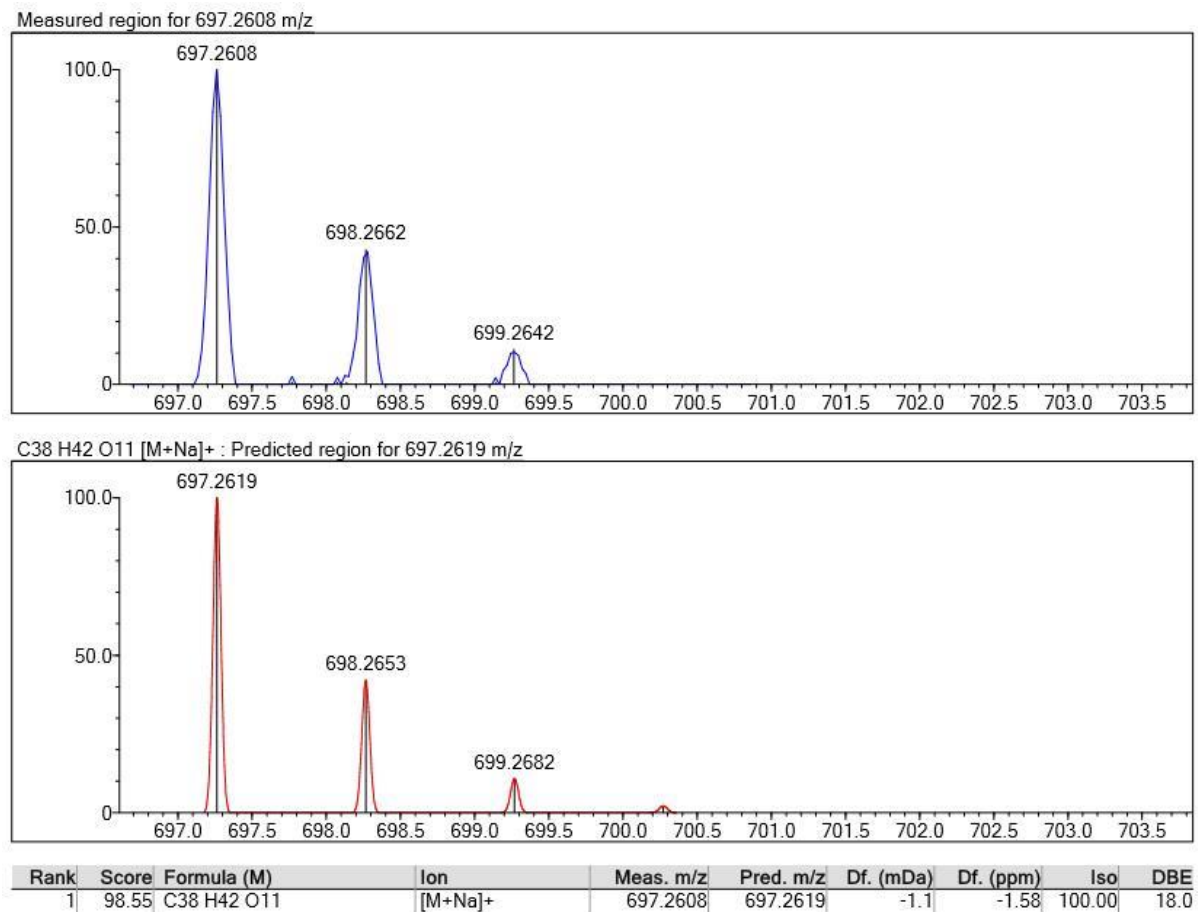

**Figure S156.** HRESIMS spectrum of **25**.

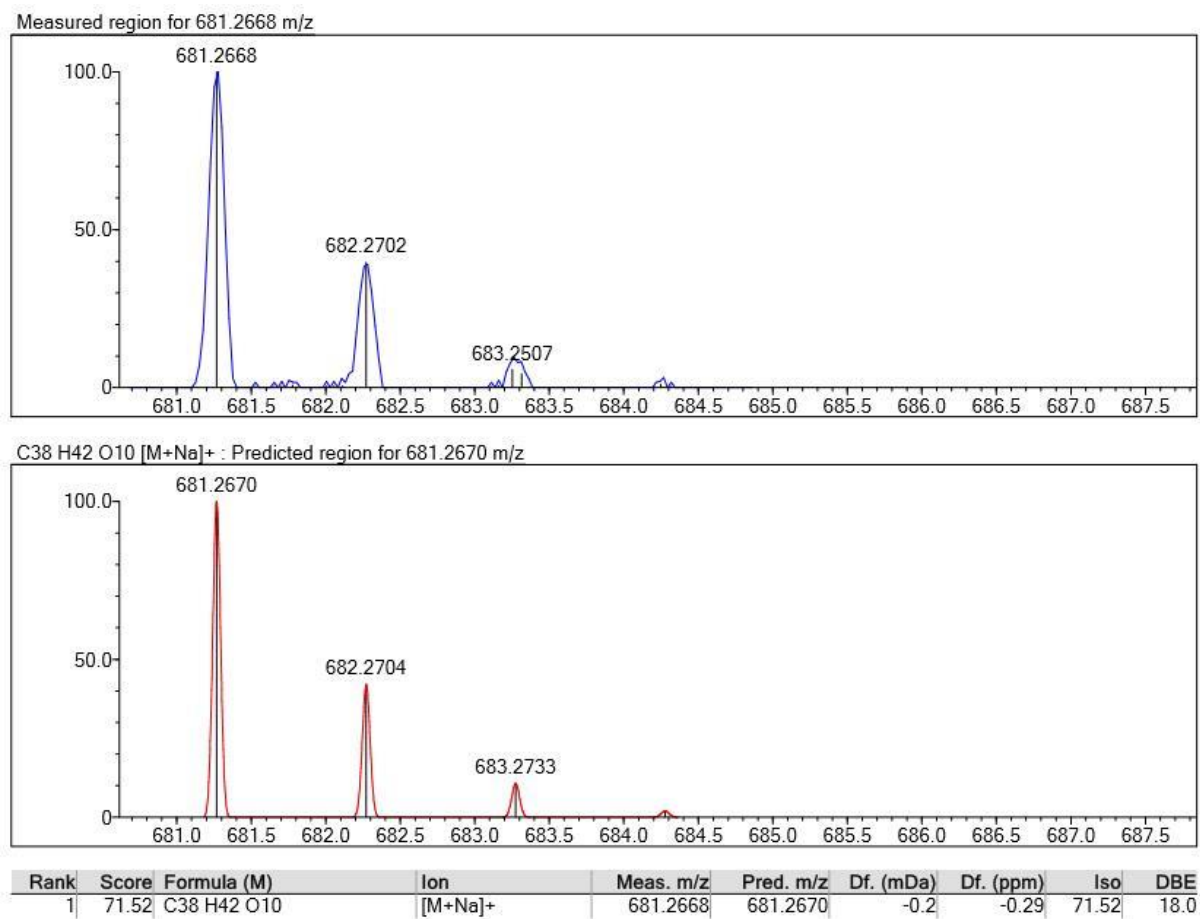

Figure S157. HRESIMS spectrum of **26**.

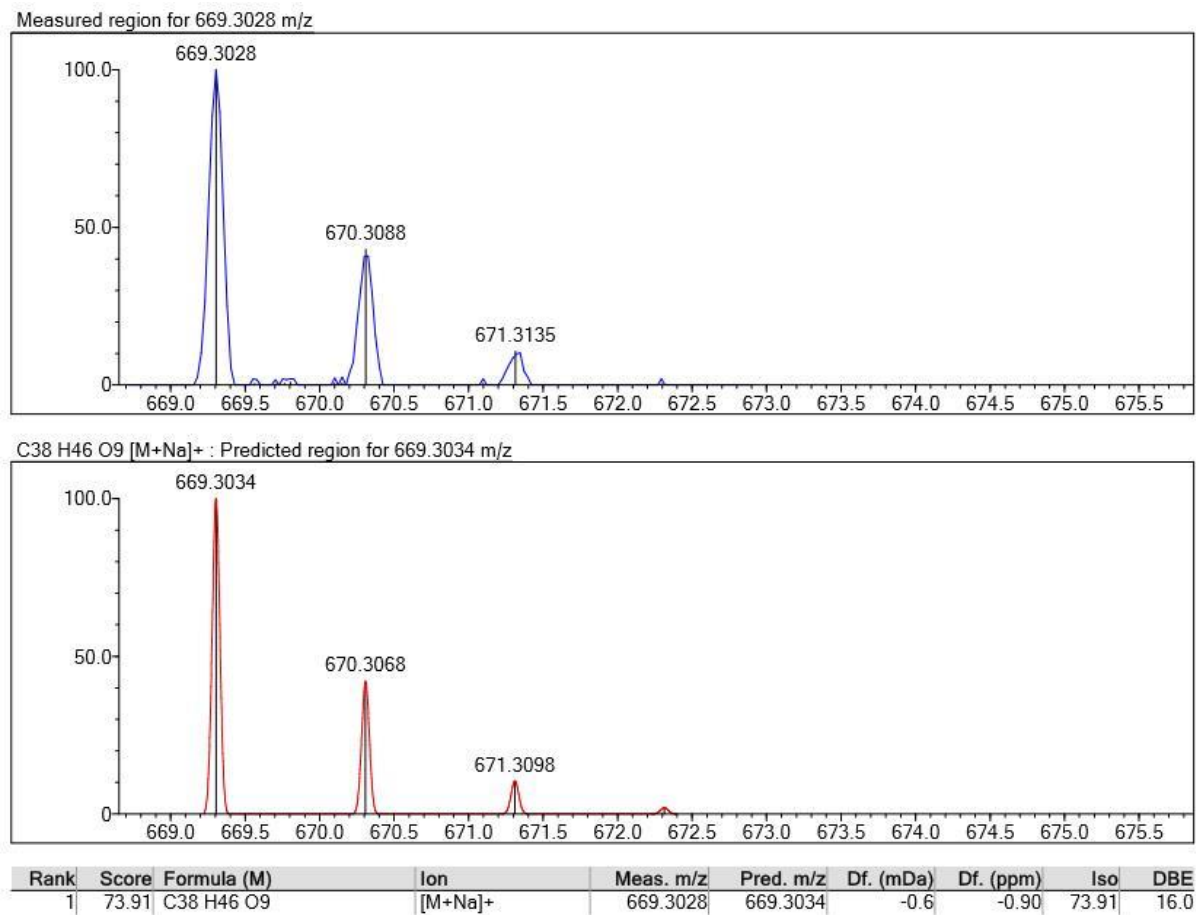

Figure S158. HRESIMS spectrum of **28**.

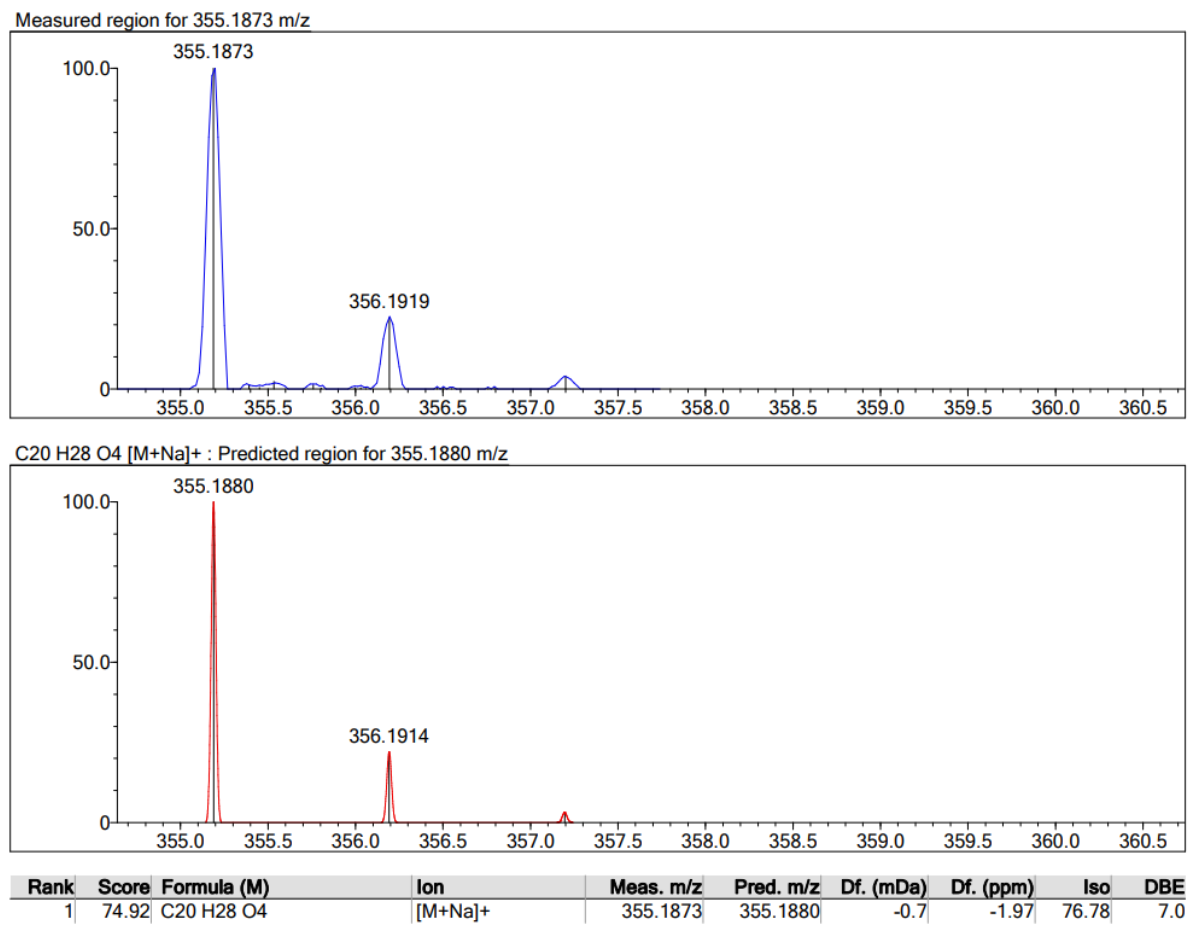



Figure S159. HRESIMS spectrum of **29**.

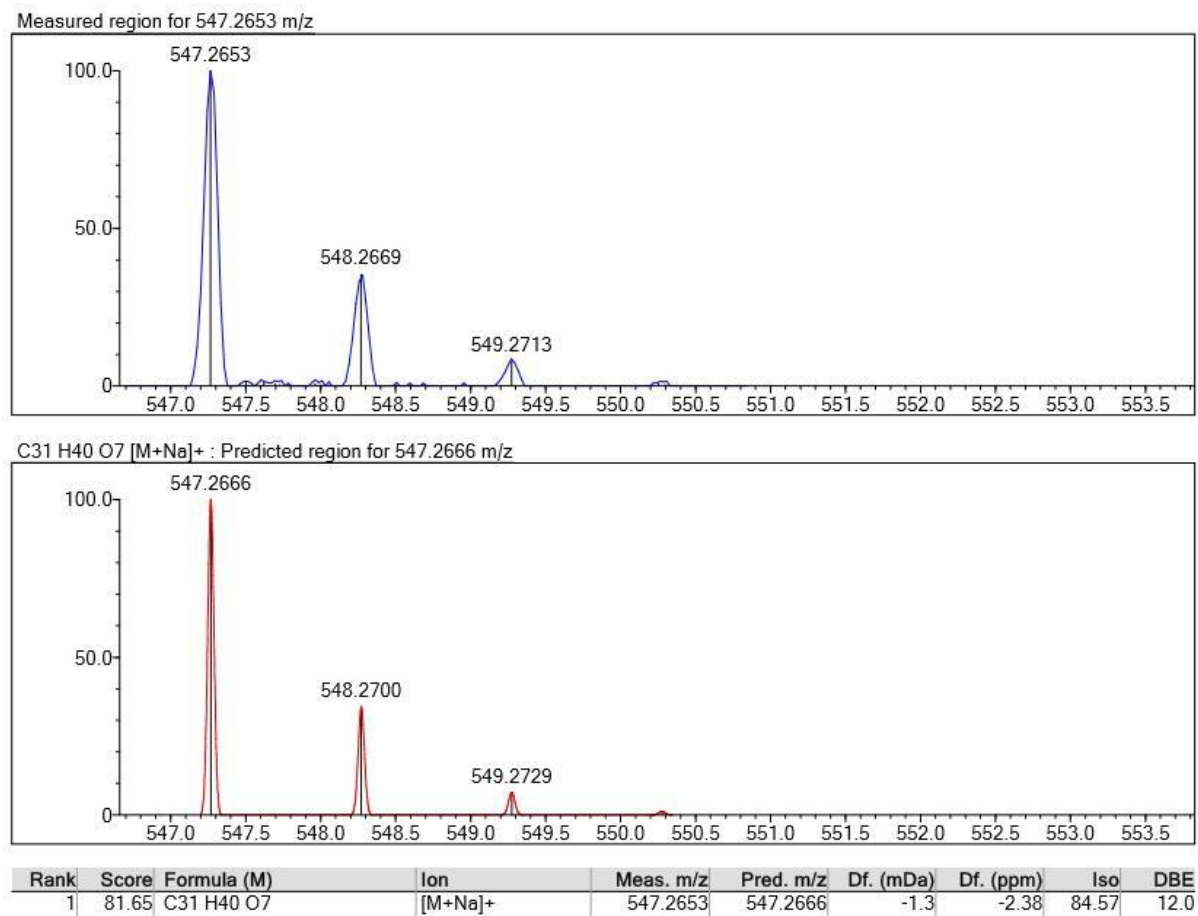

**Figure S160.** HRESIMS spectrum of **30**.

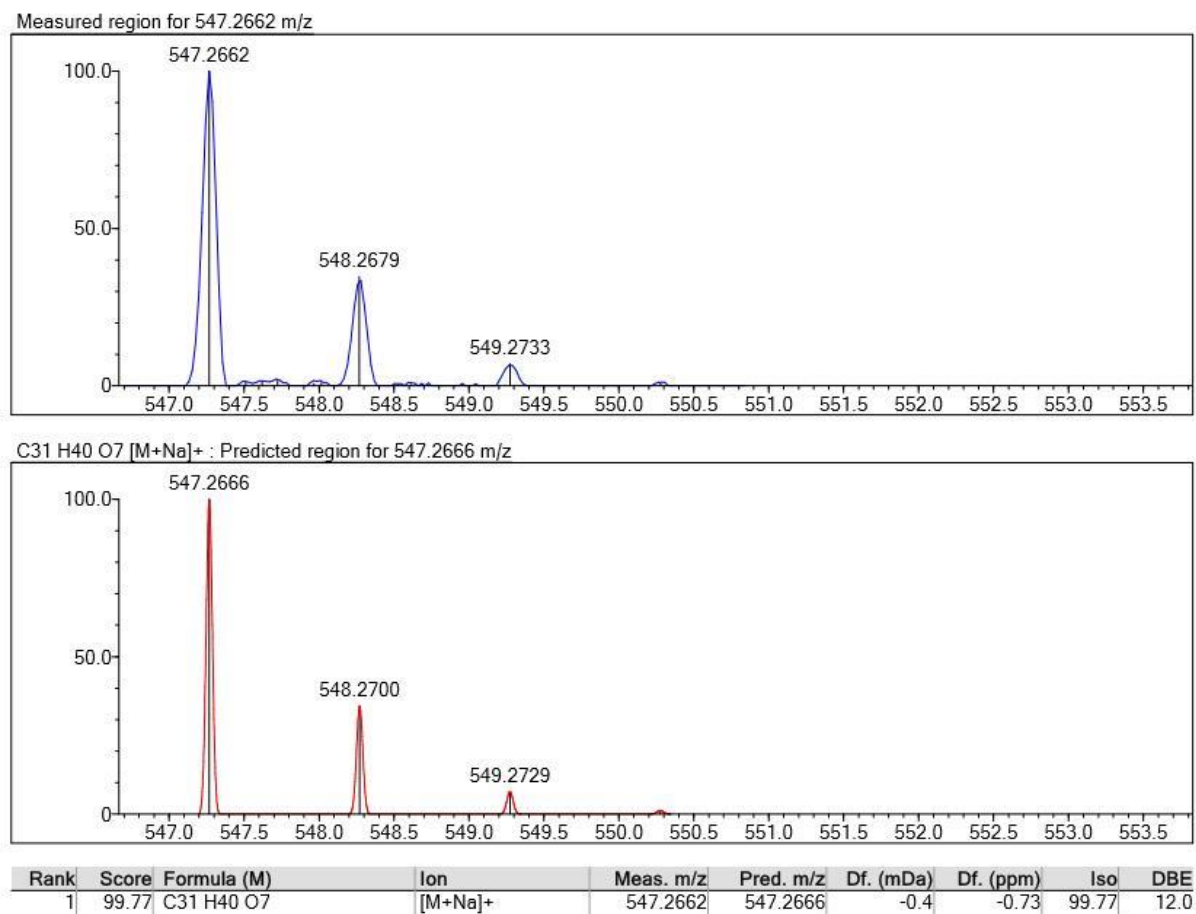

**Figure S161.** HRESIMS spectrum of **31**.

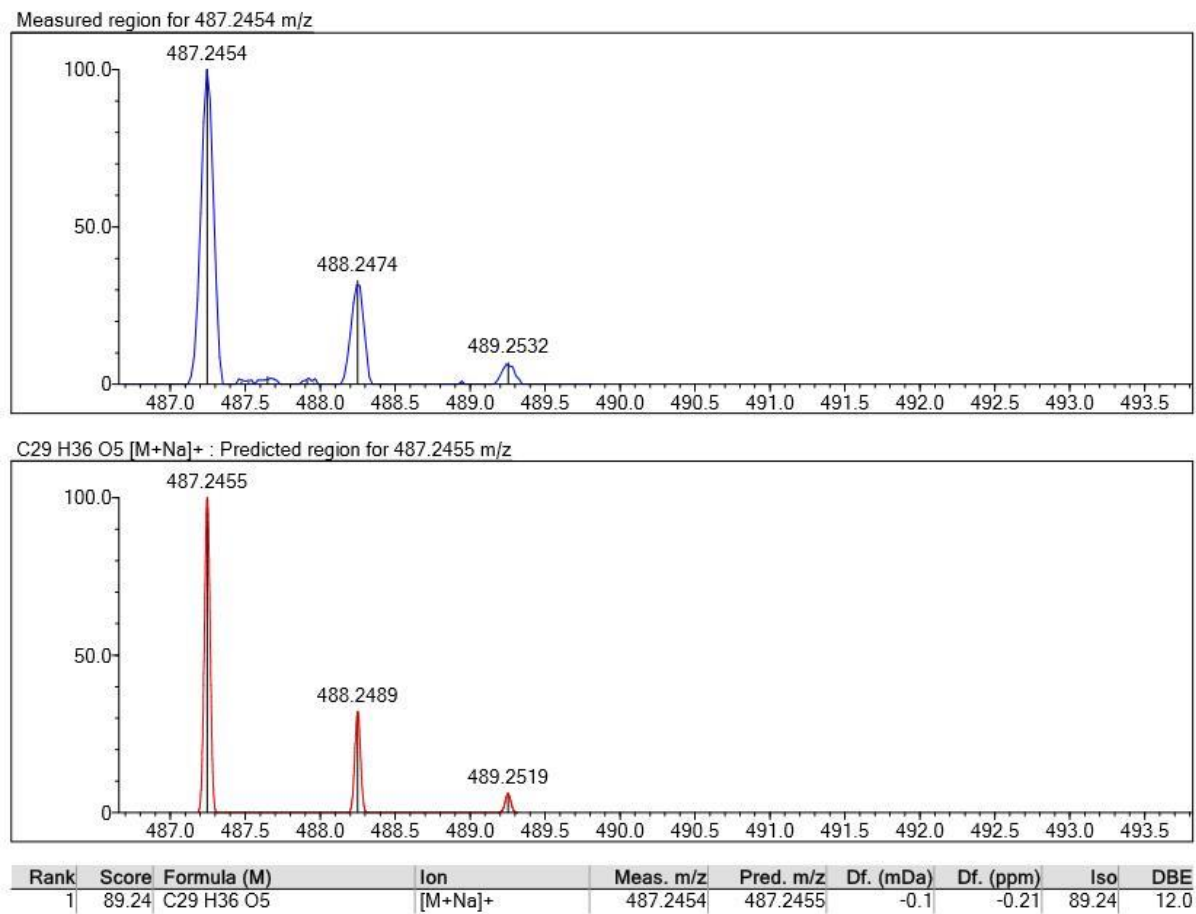

Figure S162. HRESIMS spectrum of **32**.

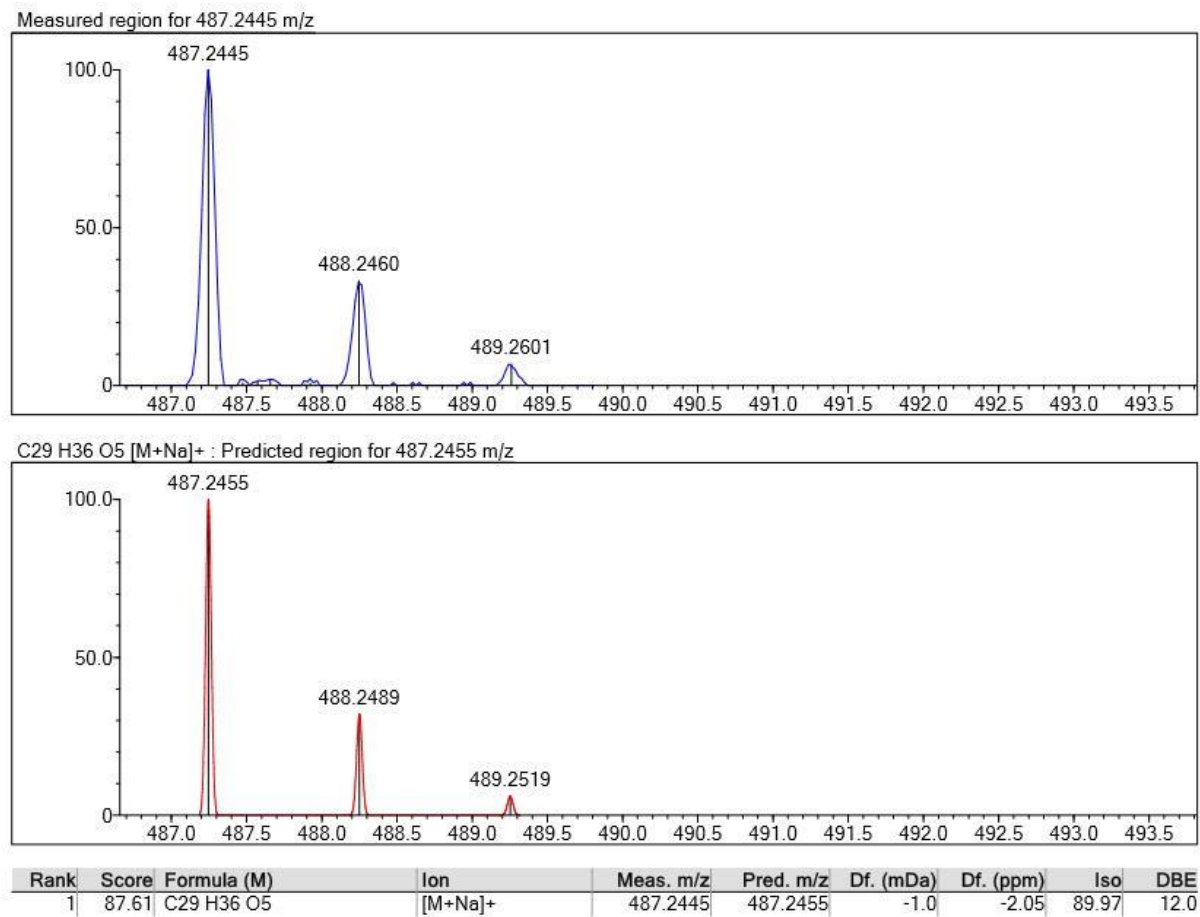

**Figure S163.** HRESIMS spectrum of **33**.

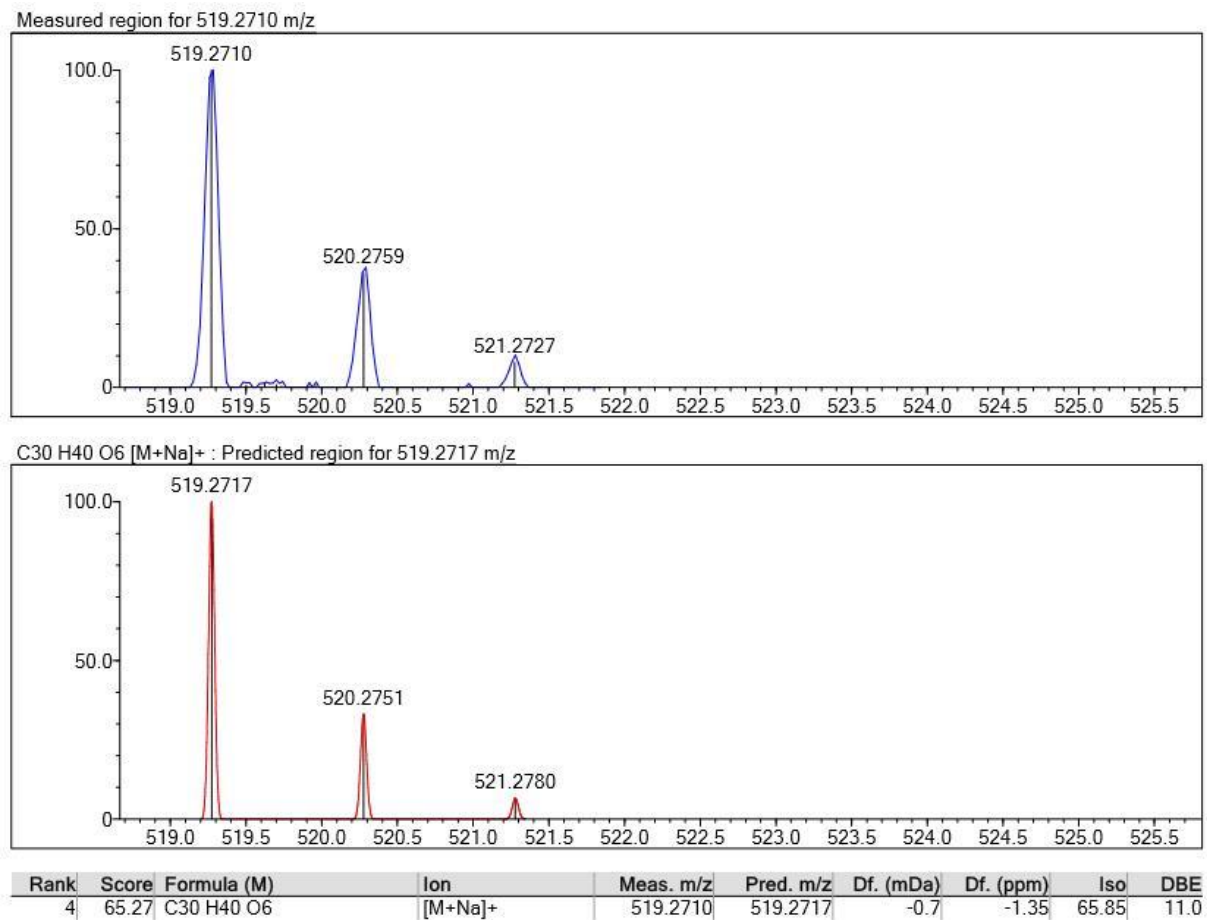

Figure S164. HRESIMS spectrum of **34**.

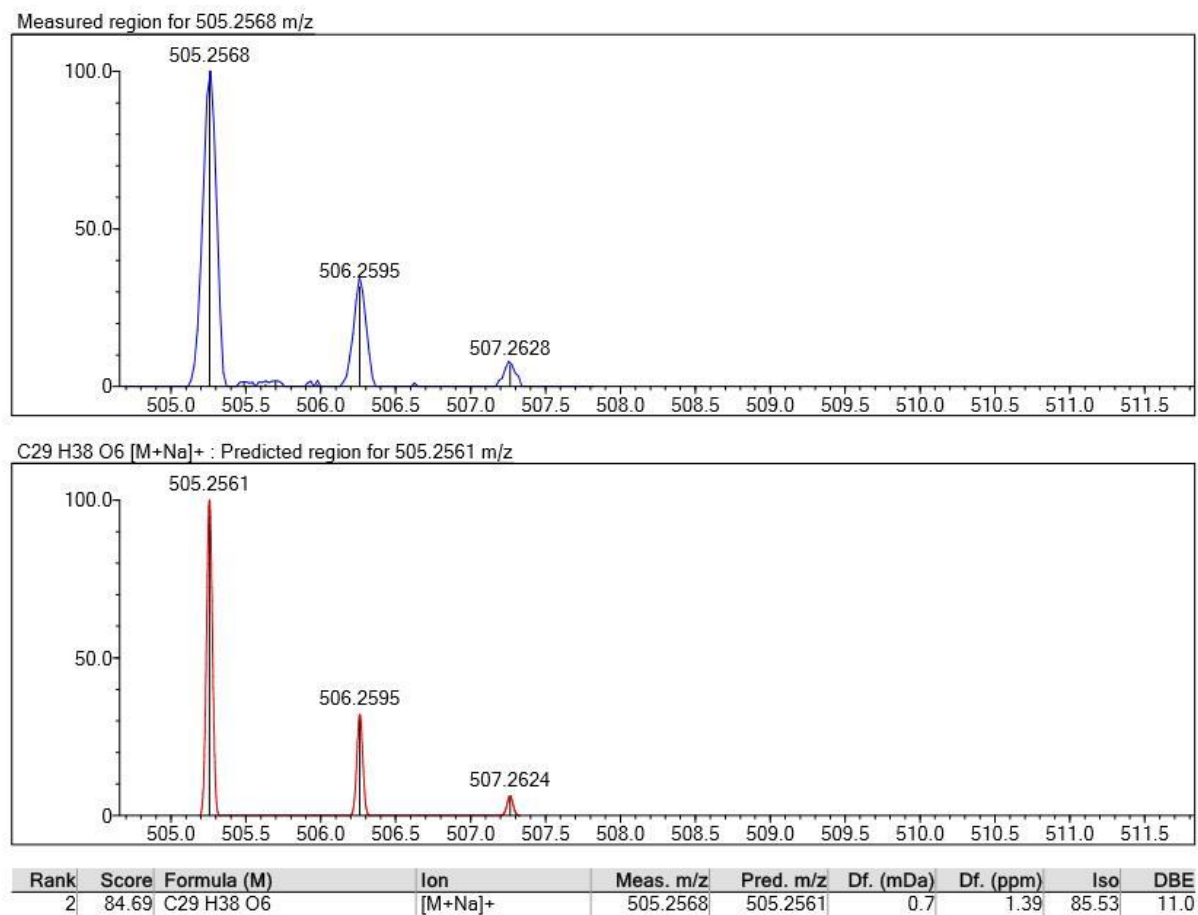

13. Figure S165–S185.

Figure S165. IR (KBr disc) spectrum of **1**.

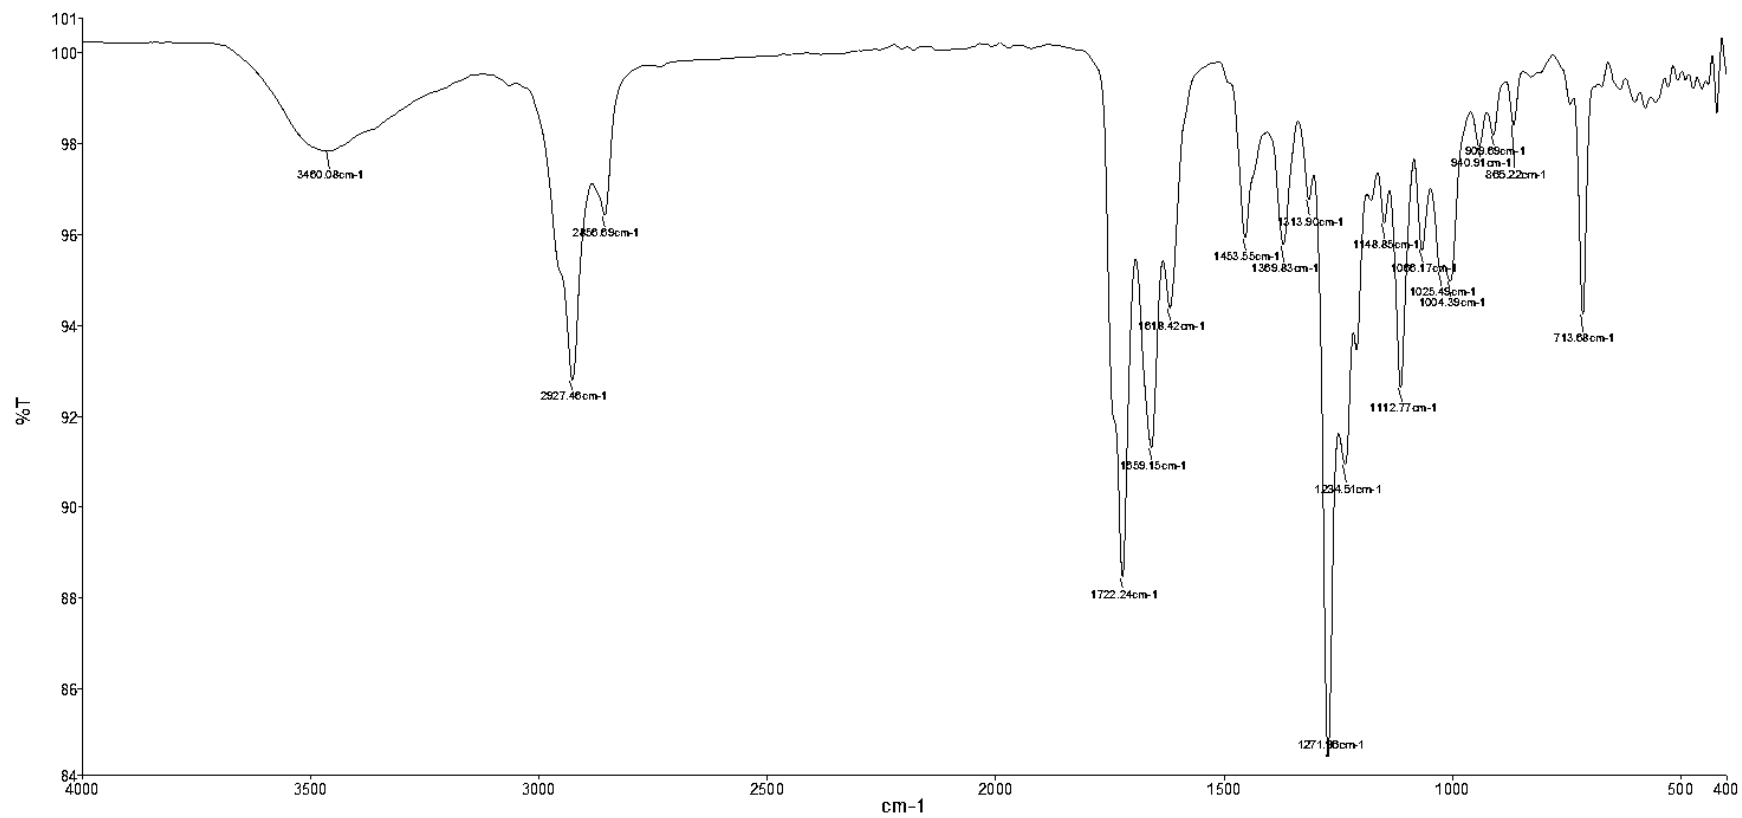

Figure S166. IR (KBr disc) spectrum of **2**.

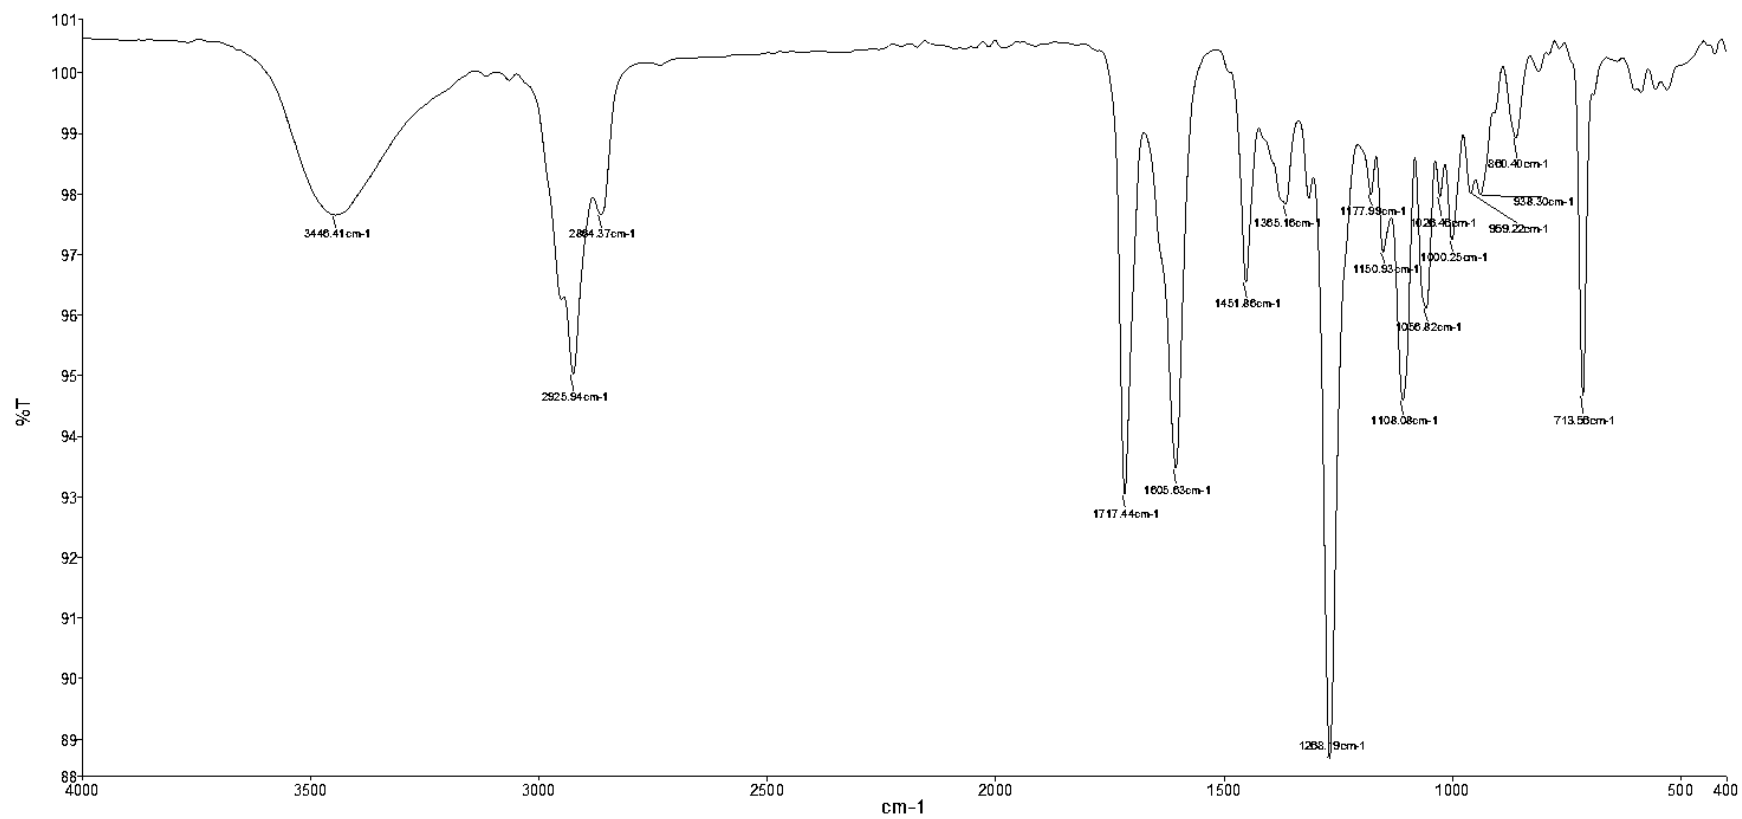



Figure S167. IR (KBr disc) spectrum of **3**.

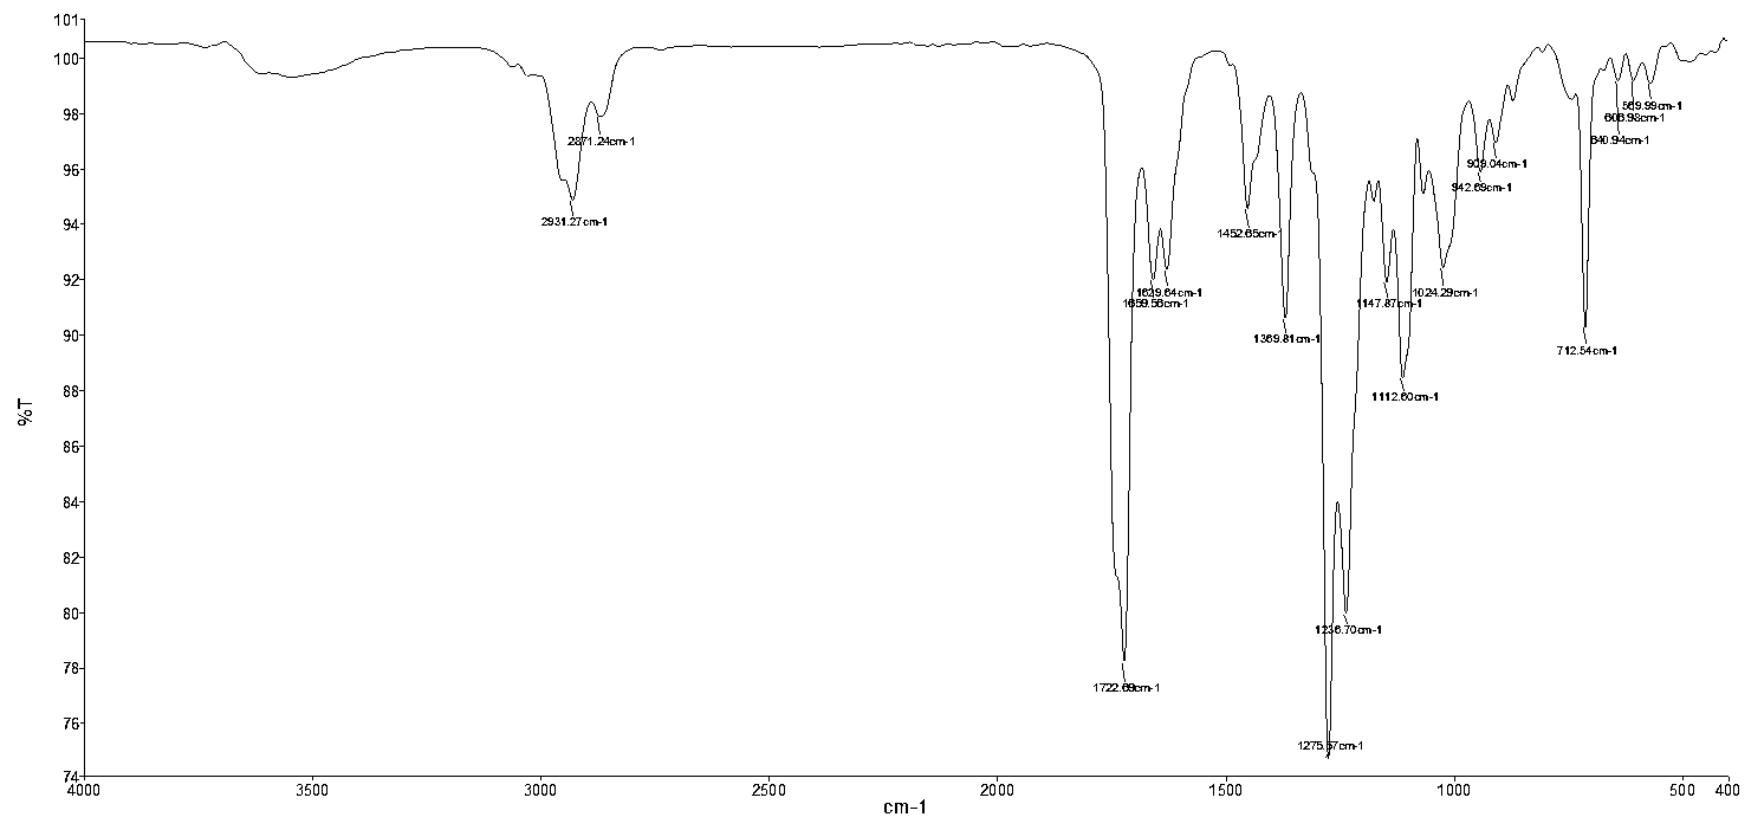

Figure S168. IR (KBr disc) spectrum of 4.

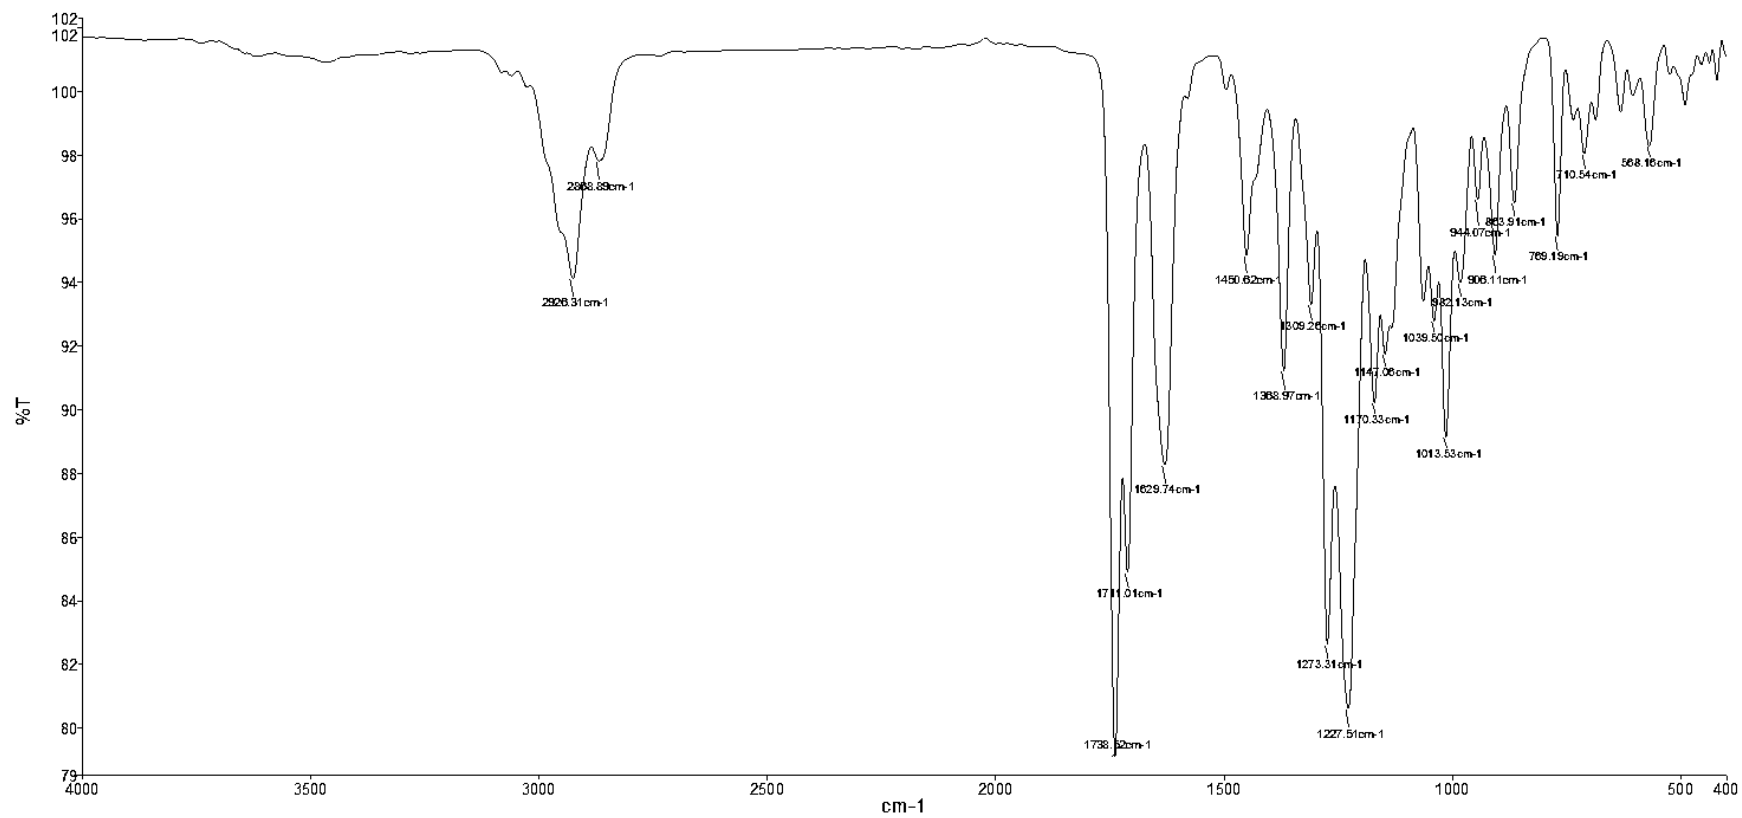

Figure S169. IR (KBr disc) spectrum of 5.

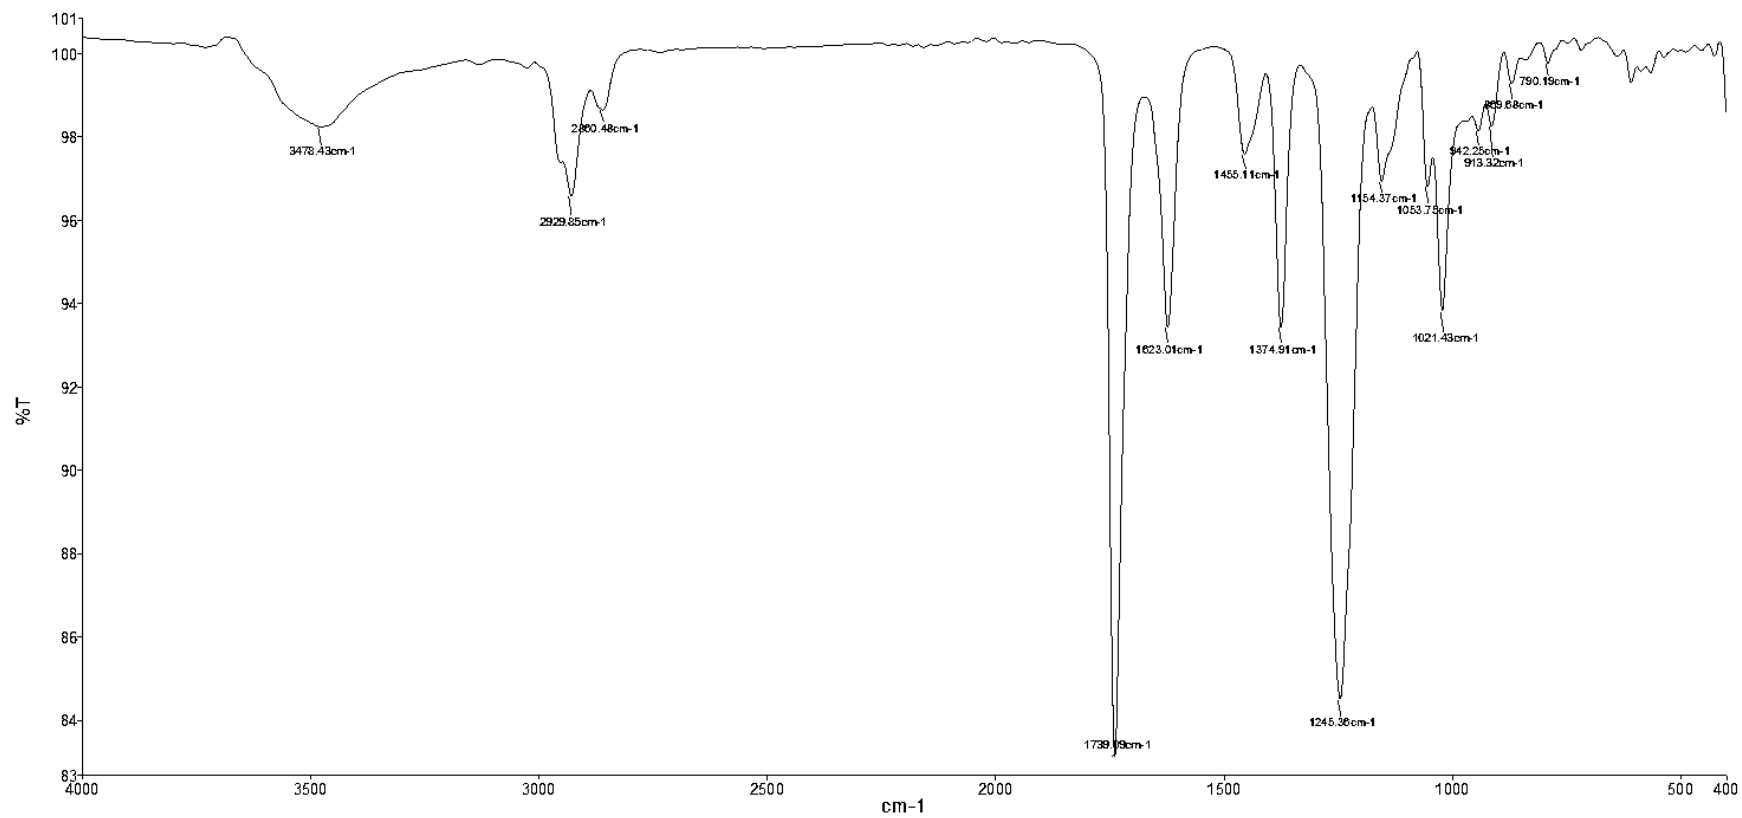

Figure S170. IR (KBr disc) spectrum of 20.

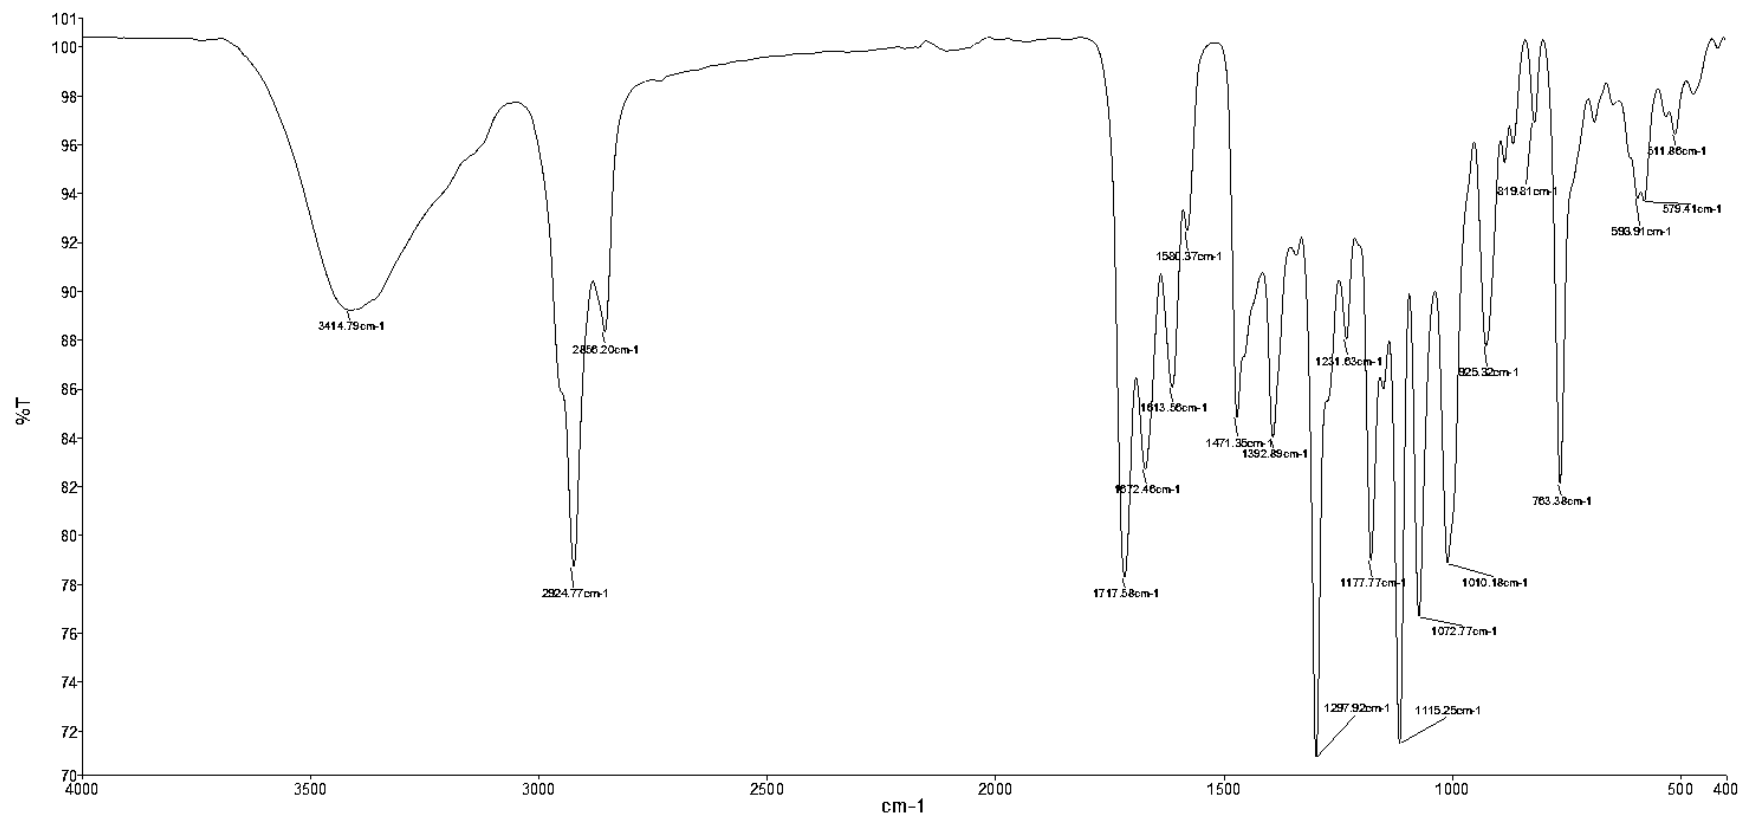

Figure S171. IR (KBr disc) spectrum of 21.

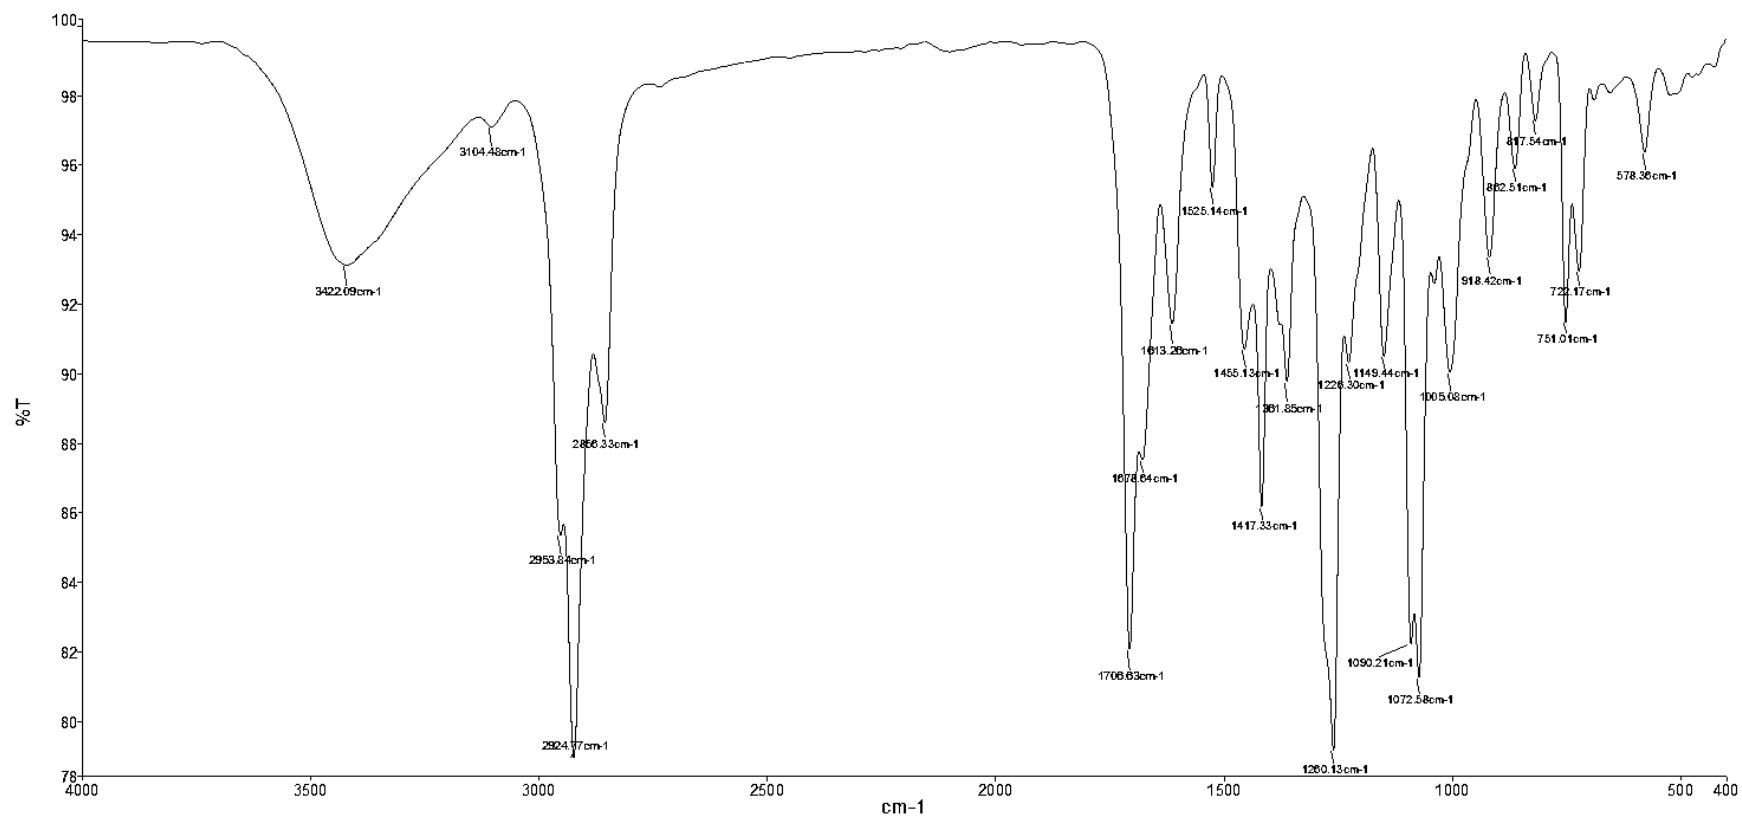

Figure S172. IR (KBr disc) spectrum of 22.

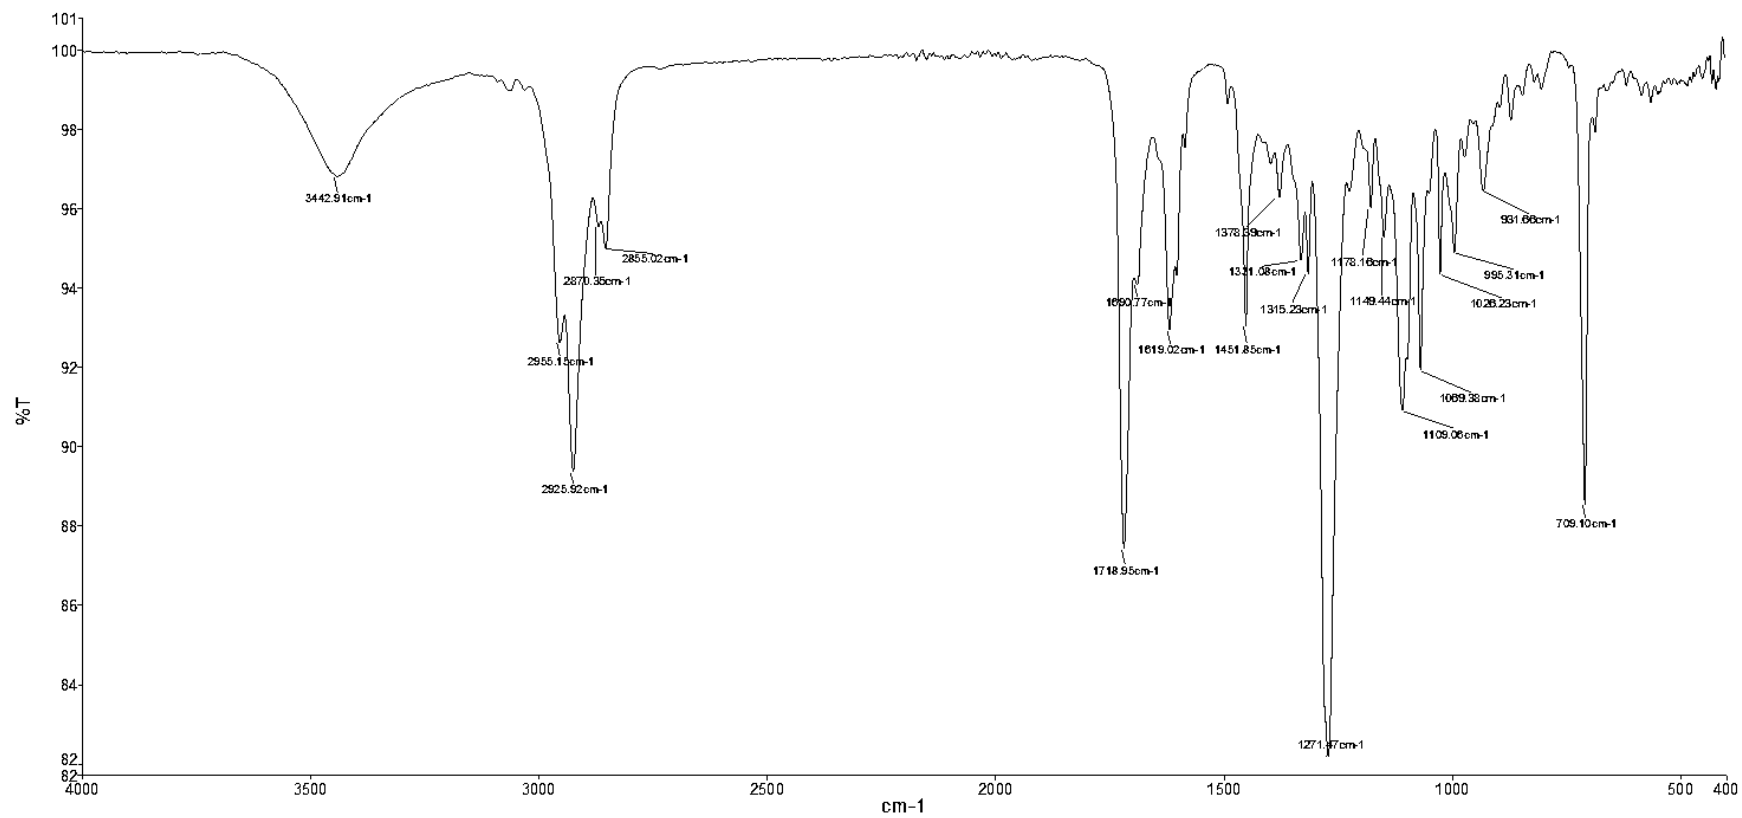

Figure S173. IR (KBr disc) spectrum of 23.

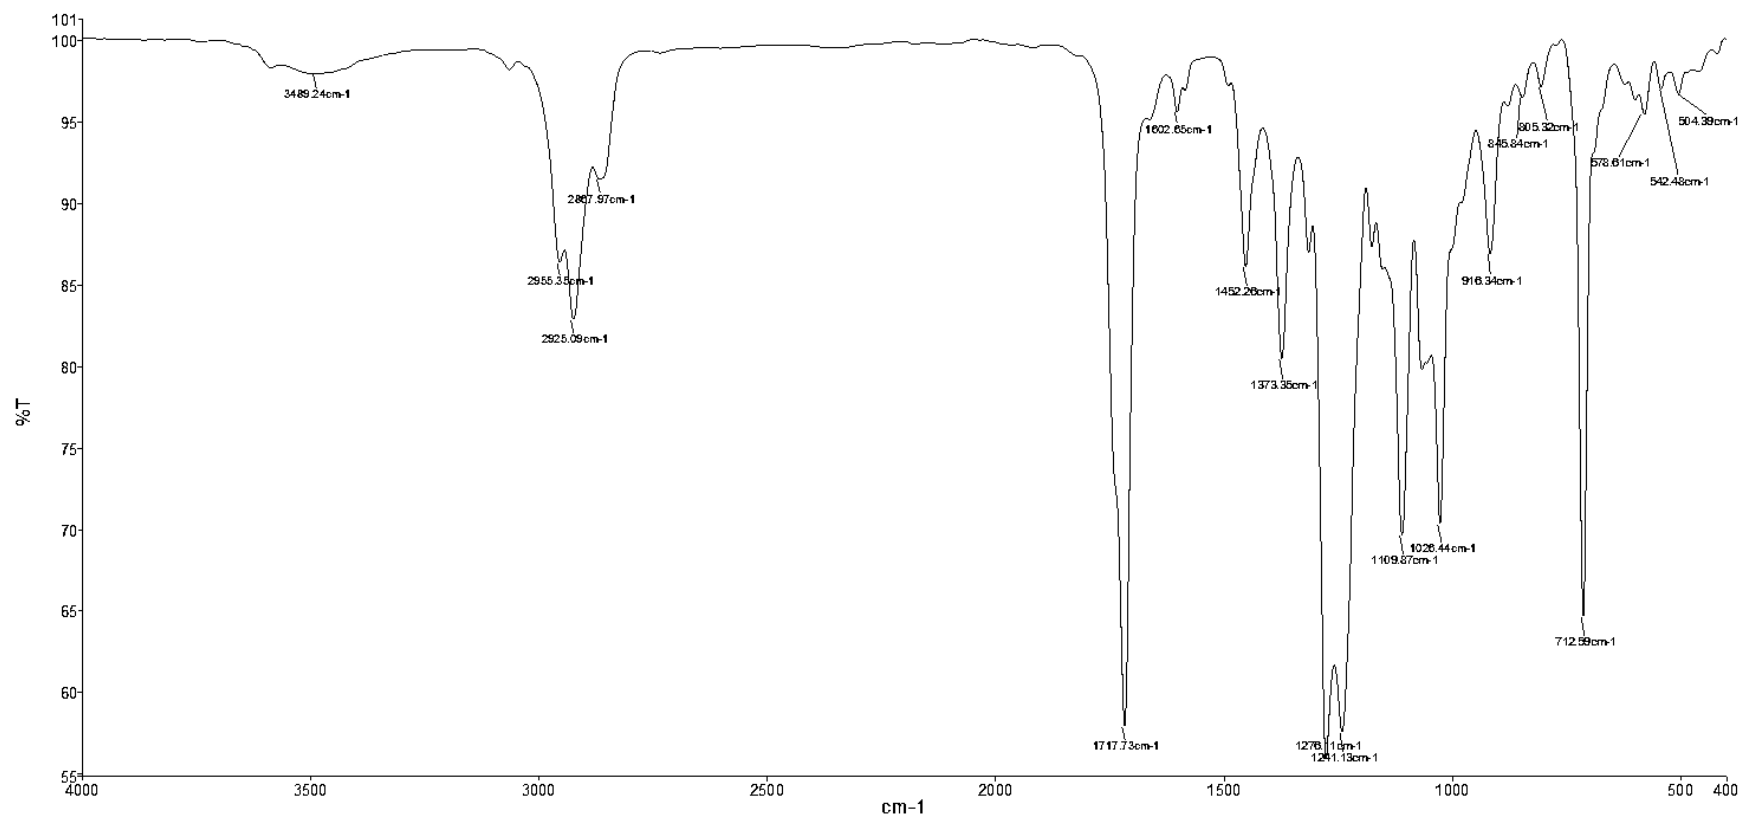

Figure S174. IR (KBr disc) spectrum of 24.

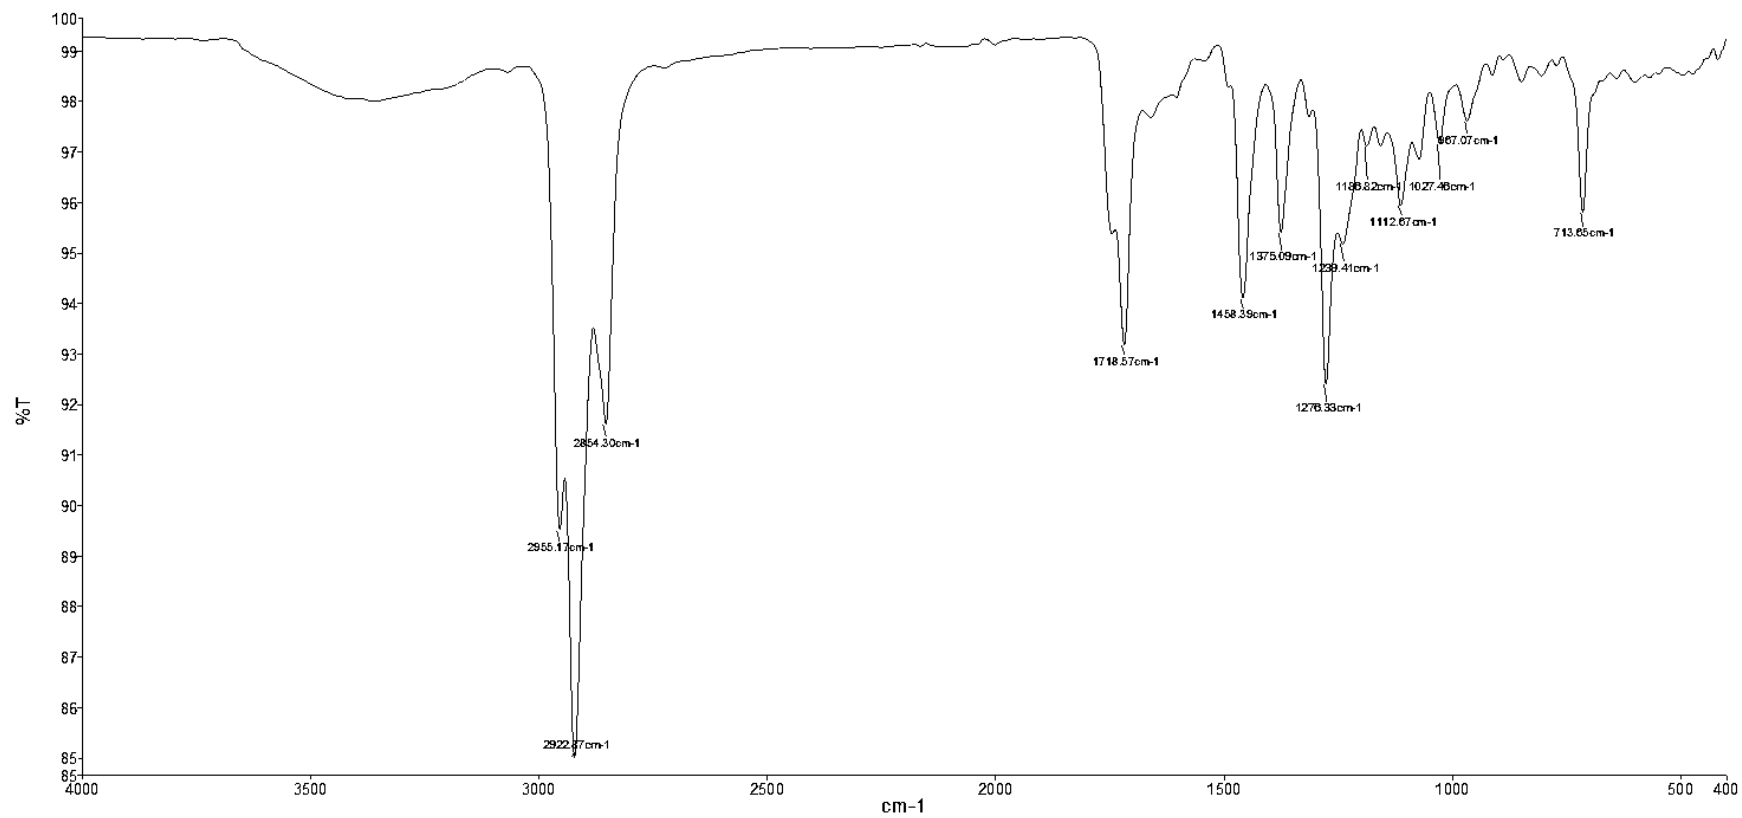



Figure S175. IR (KBr disc) spectrum of 25.

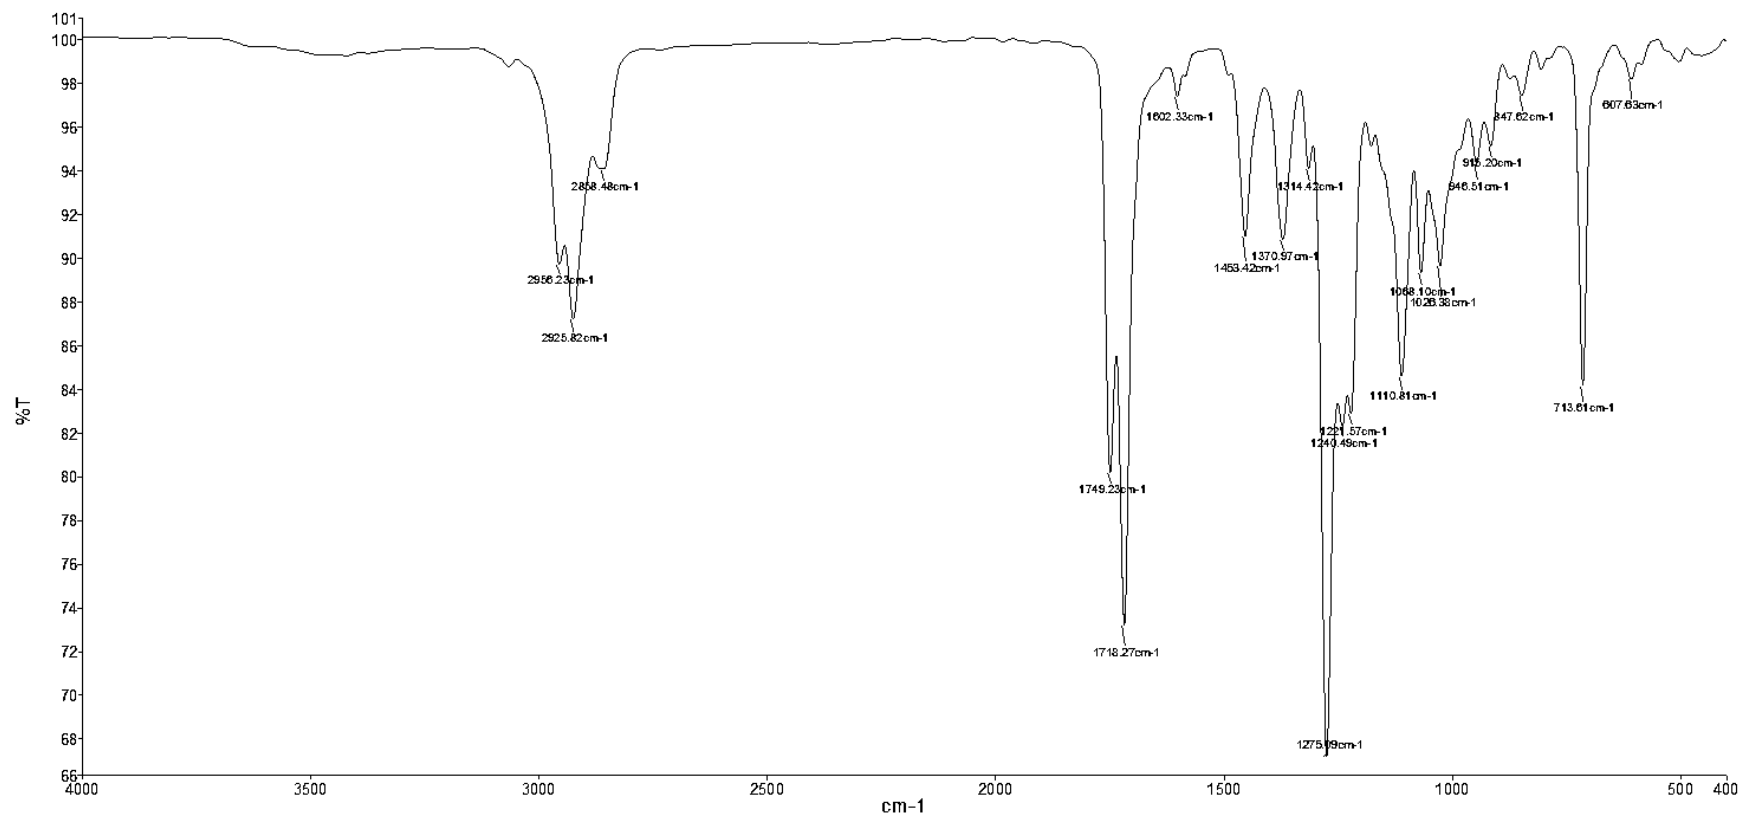

Figure S176. IR (KBr disc) spectrum of 26.

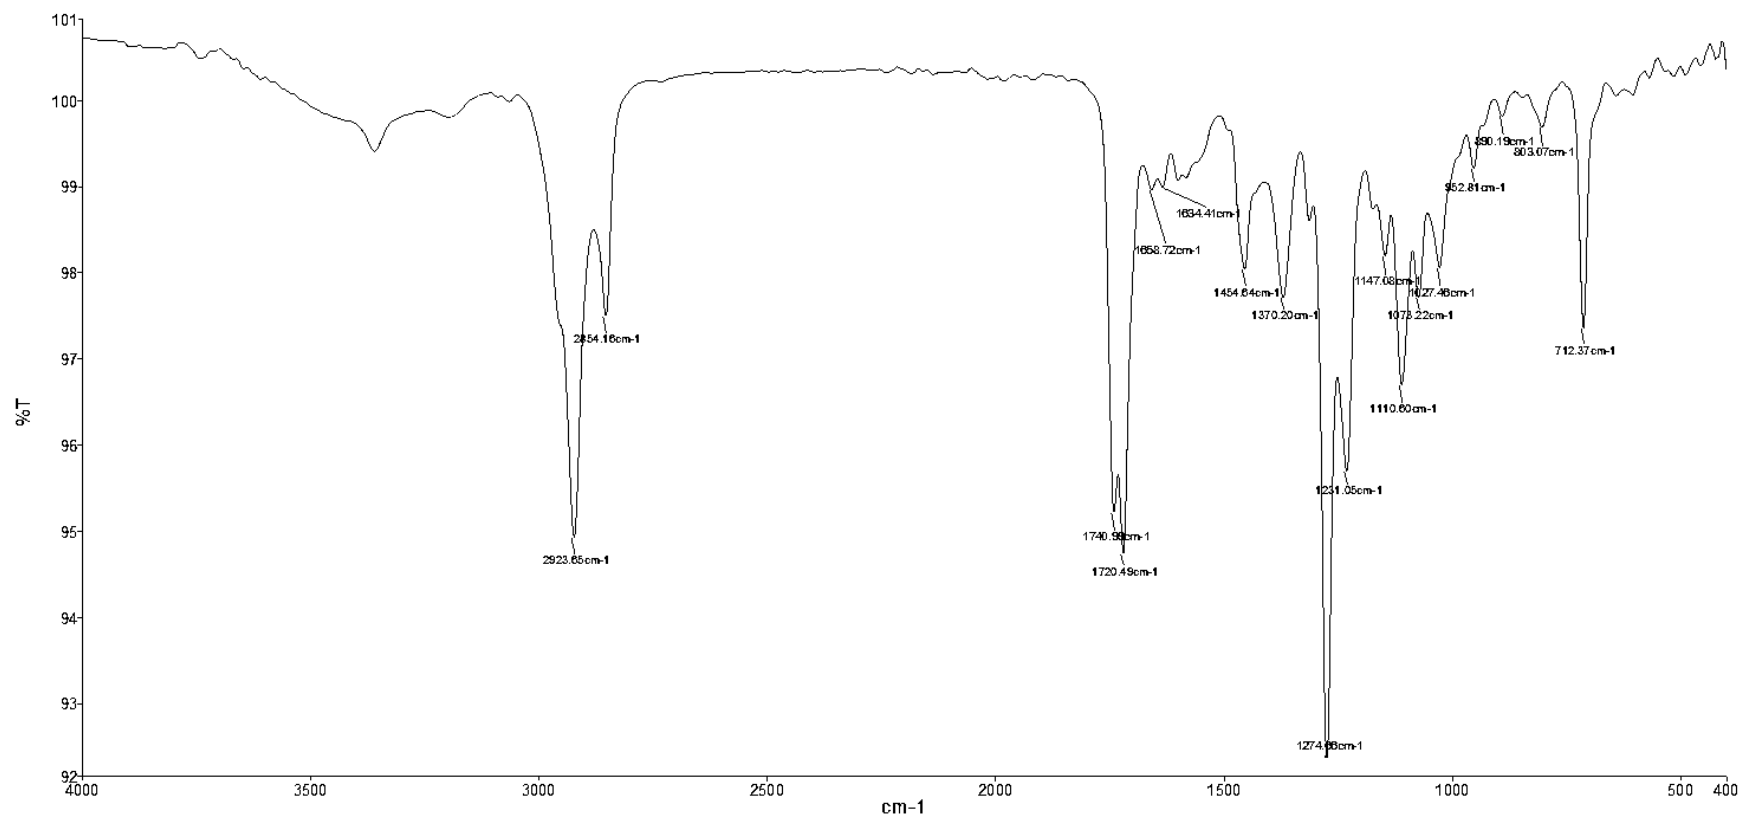

Figure S177. IR (KBr disc) spectrum of 28.

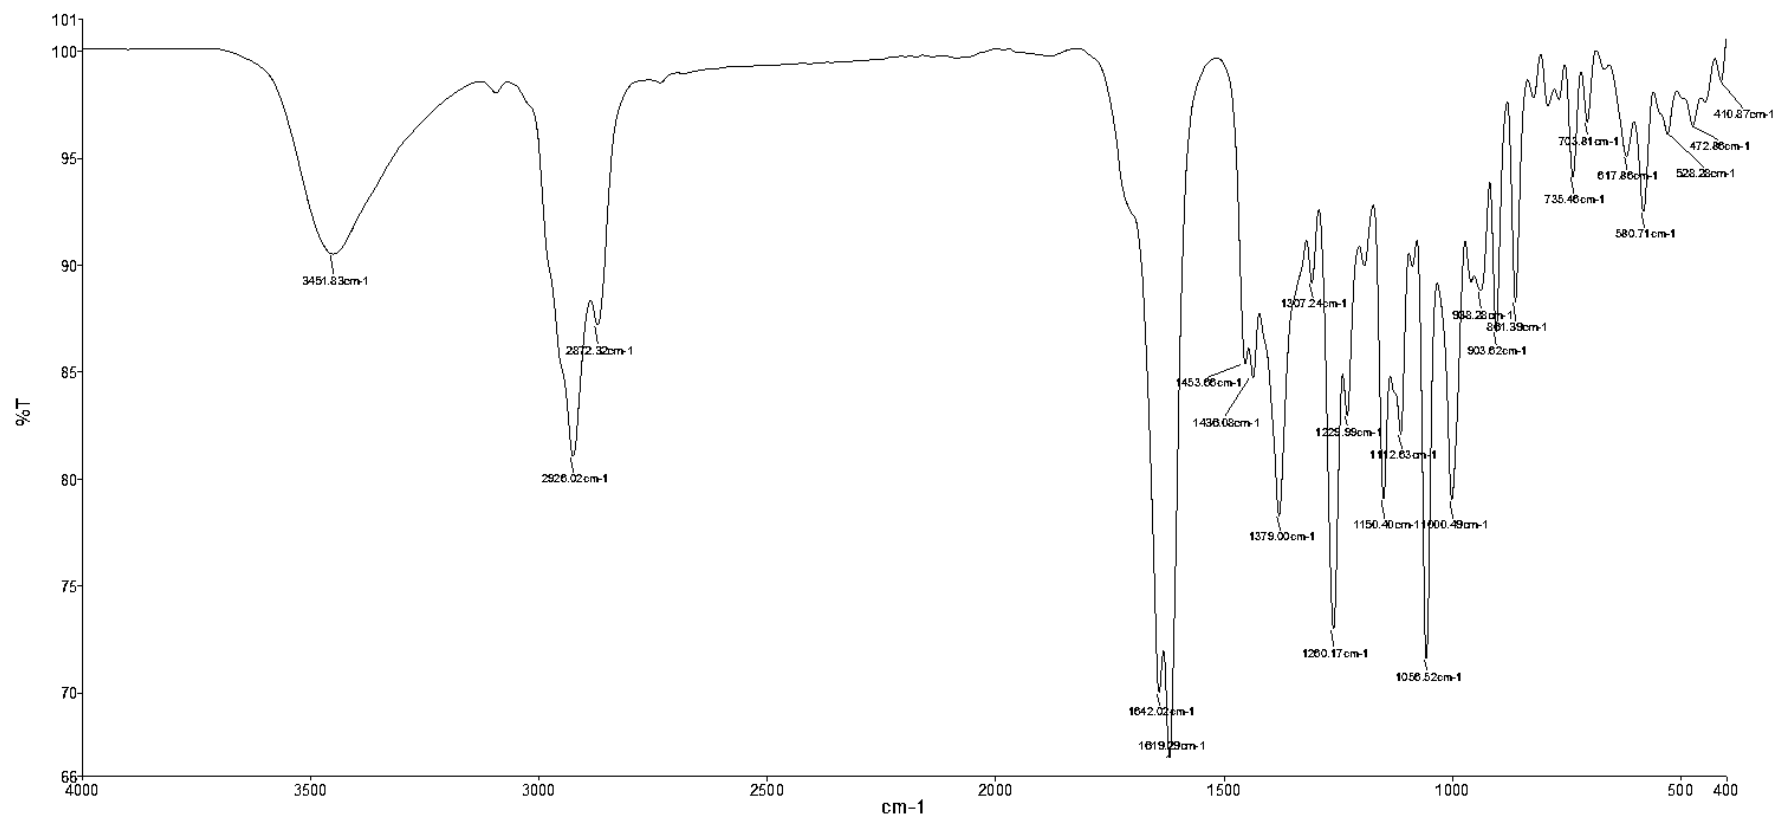

Figure S178. IR (KBr disc) spectrum of 29.

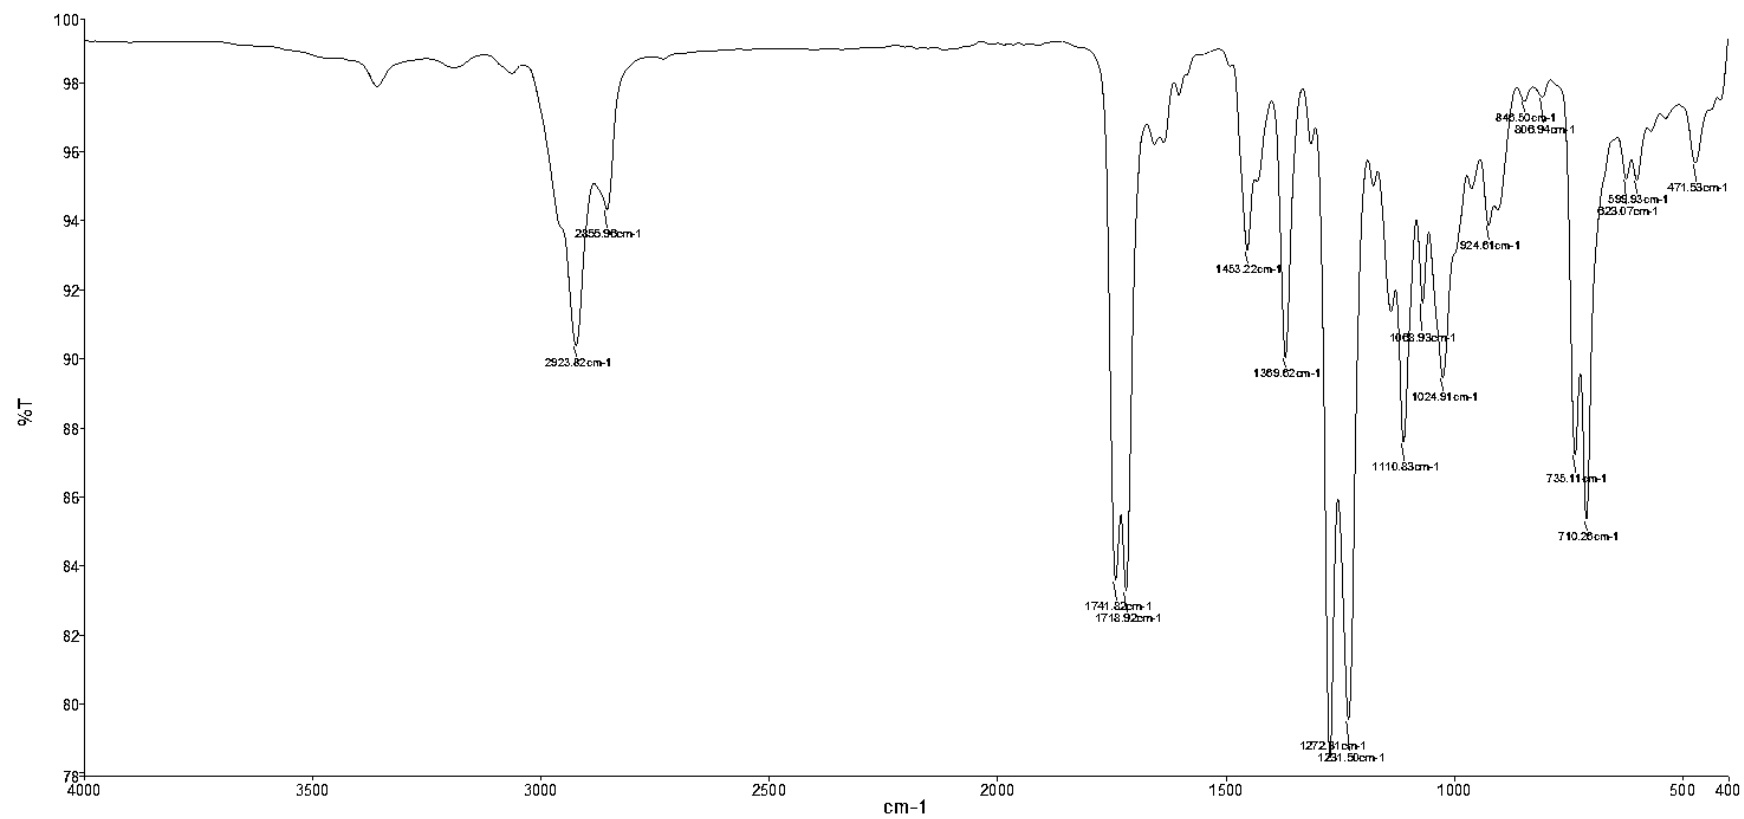

Figure S179. IR (KBr disc) spectrum of 30.

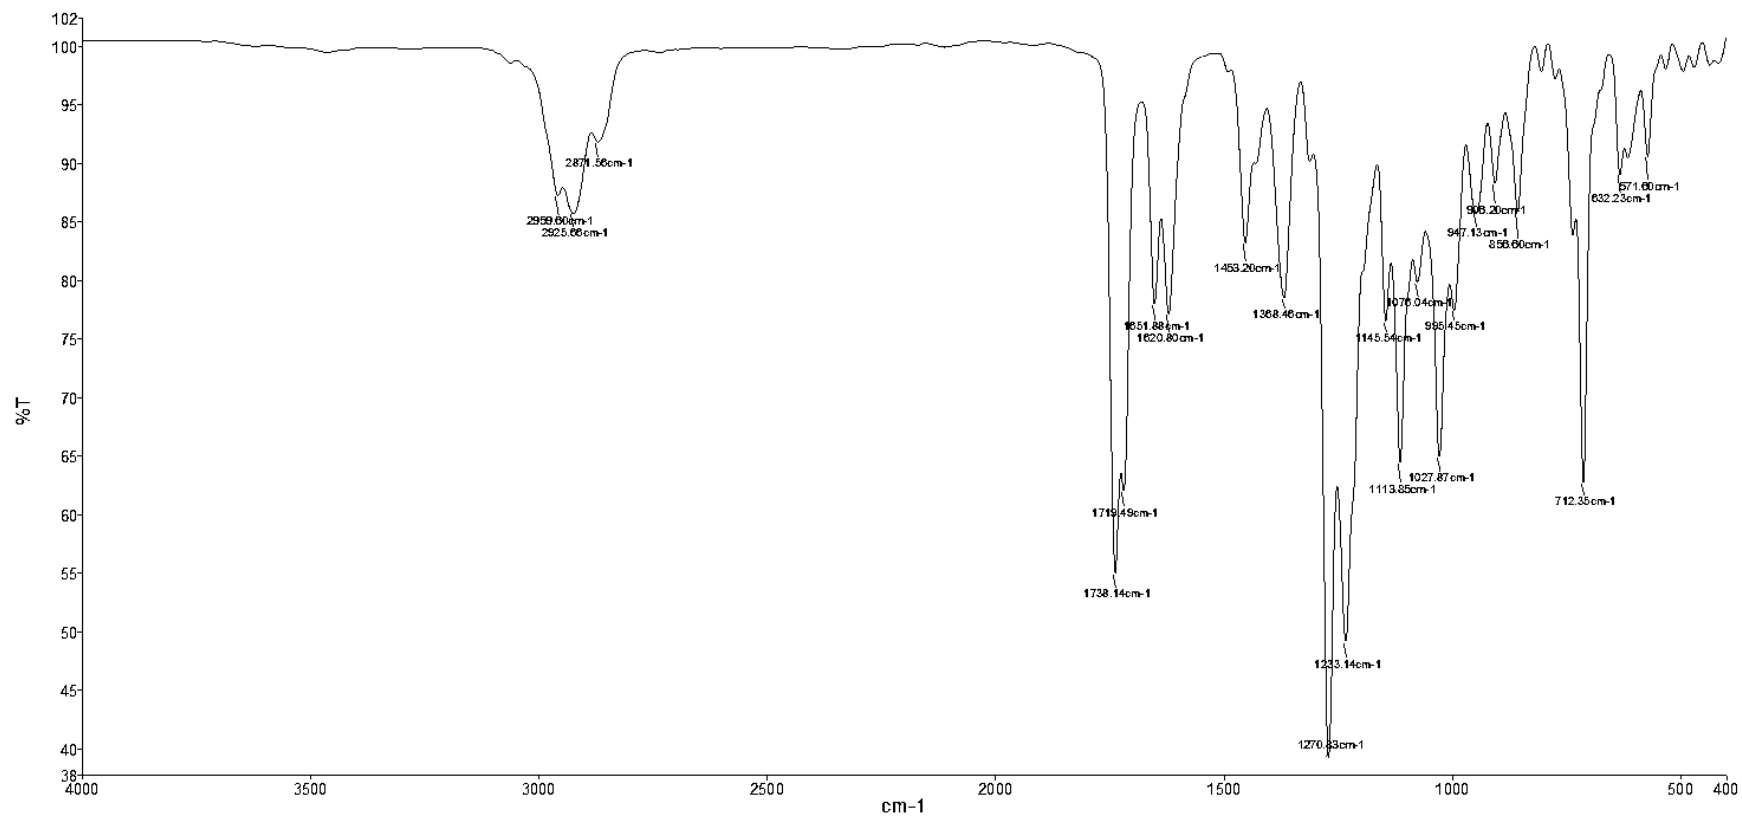

Figure S180. IR (KBr disc) spectrum of 31.

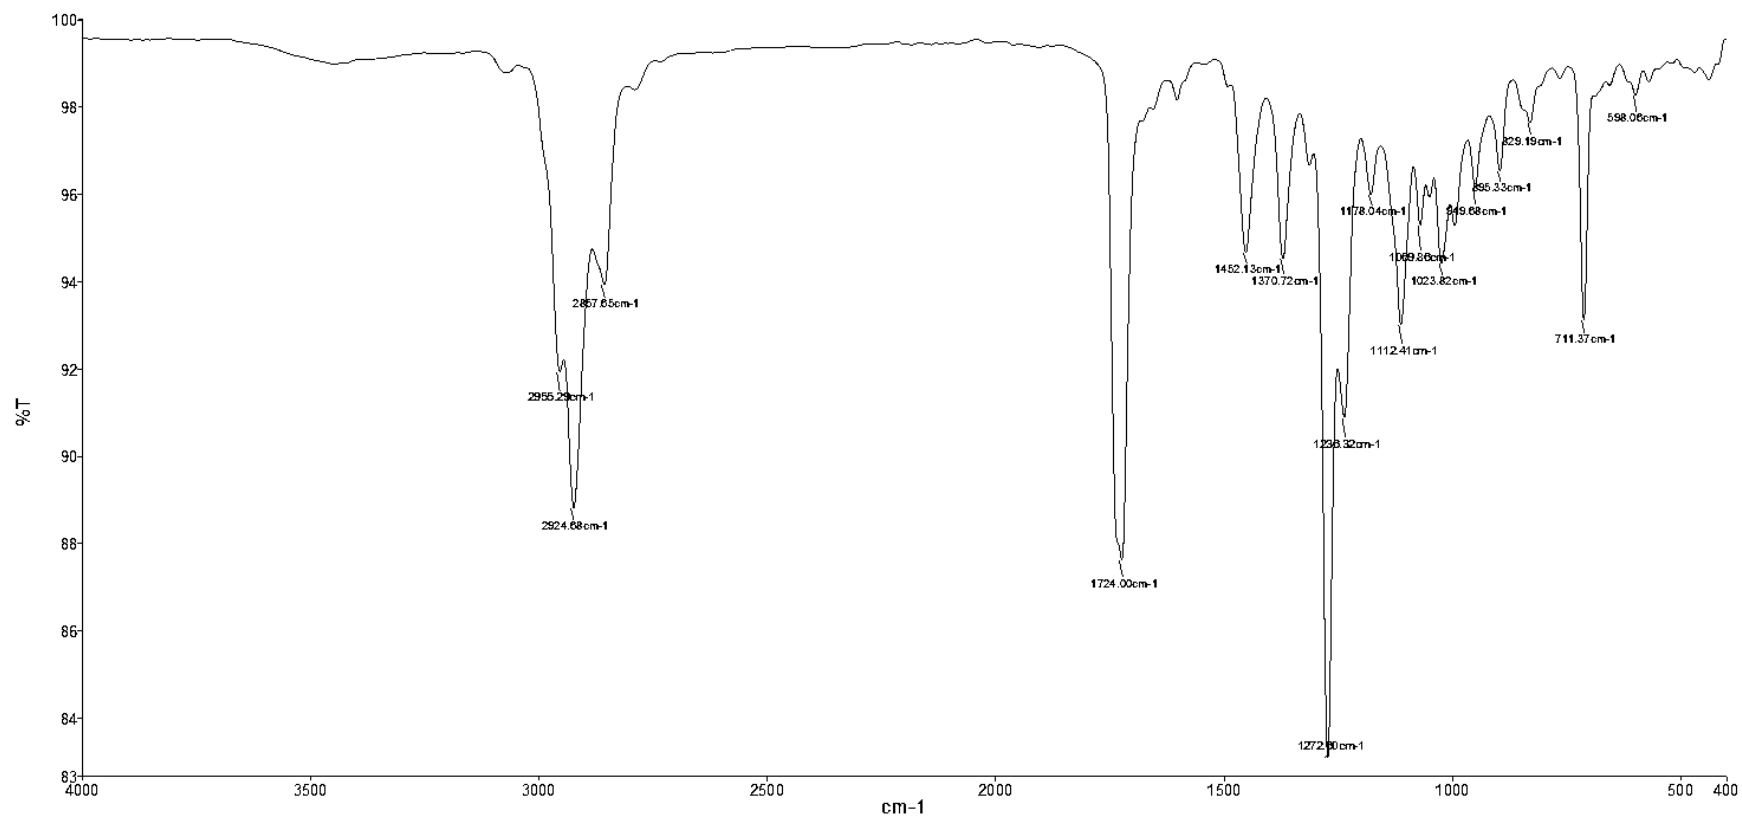

Figure S181. IR (KBr disc) spectrum of 32.

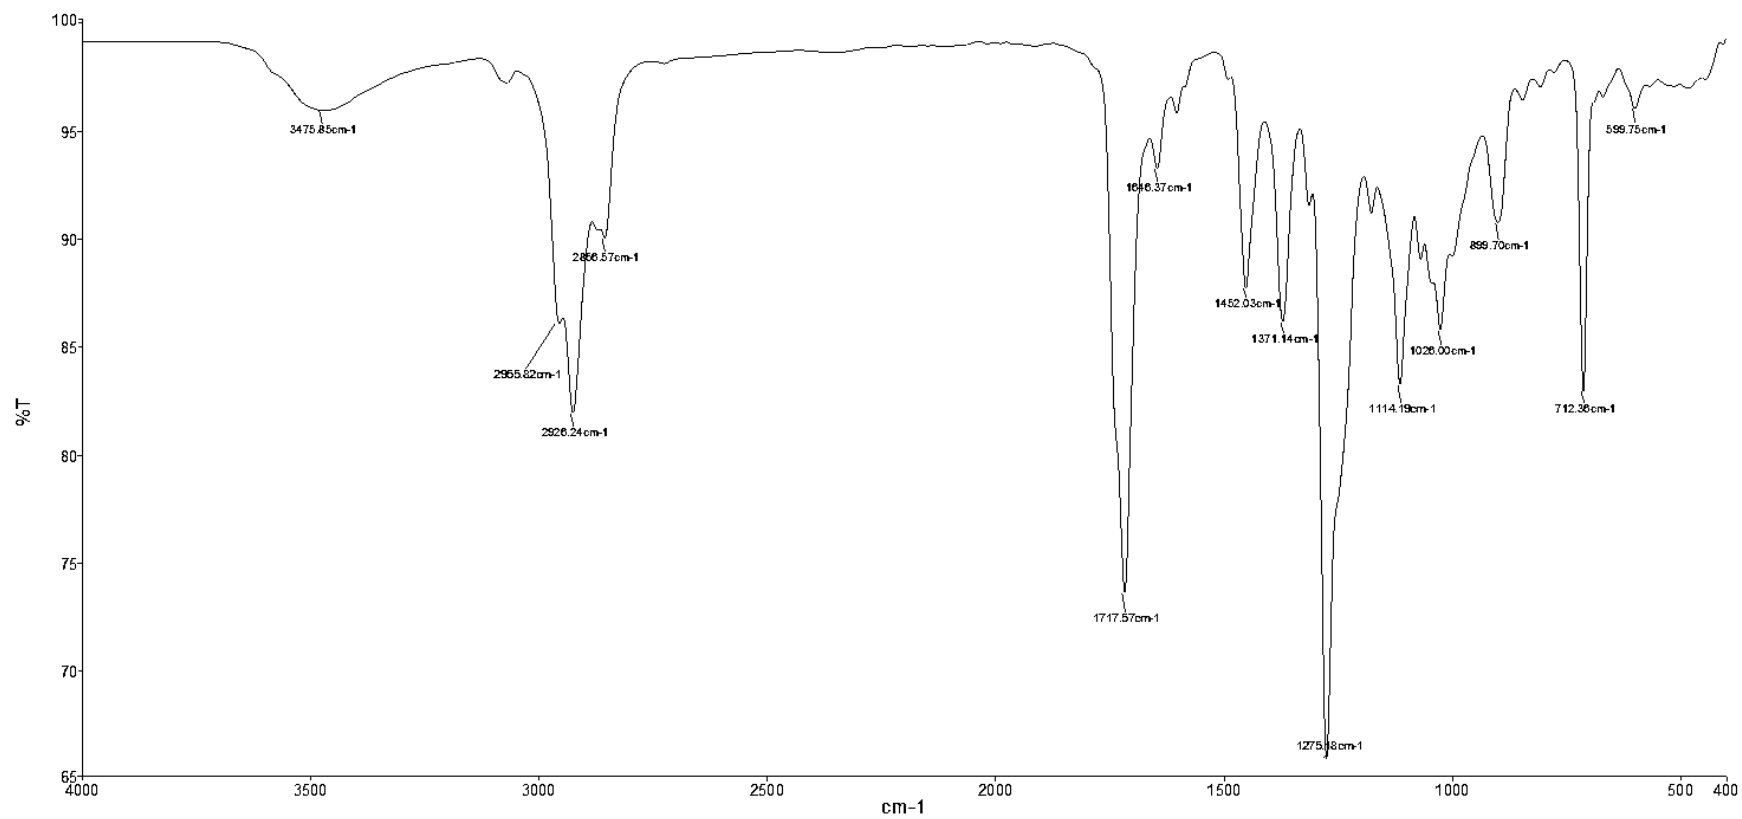

Figure S182. IR (KBr disc) spectrum of 33.

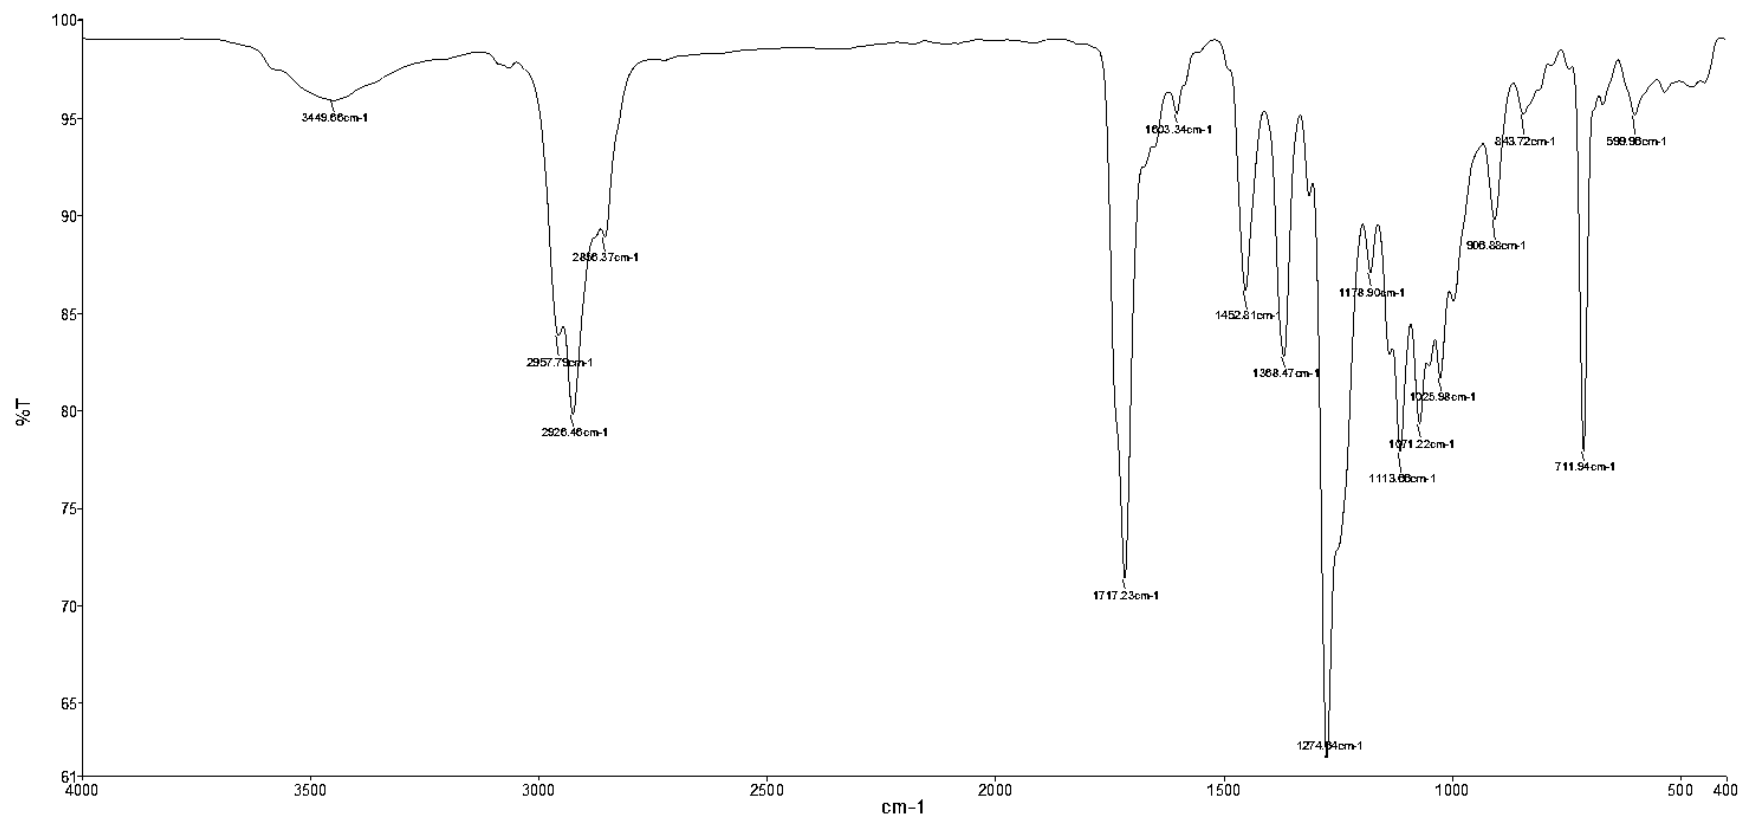



Figure S183. IR (KBr disc) spectrum of 34.

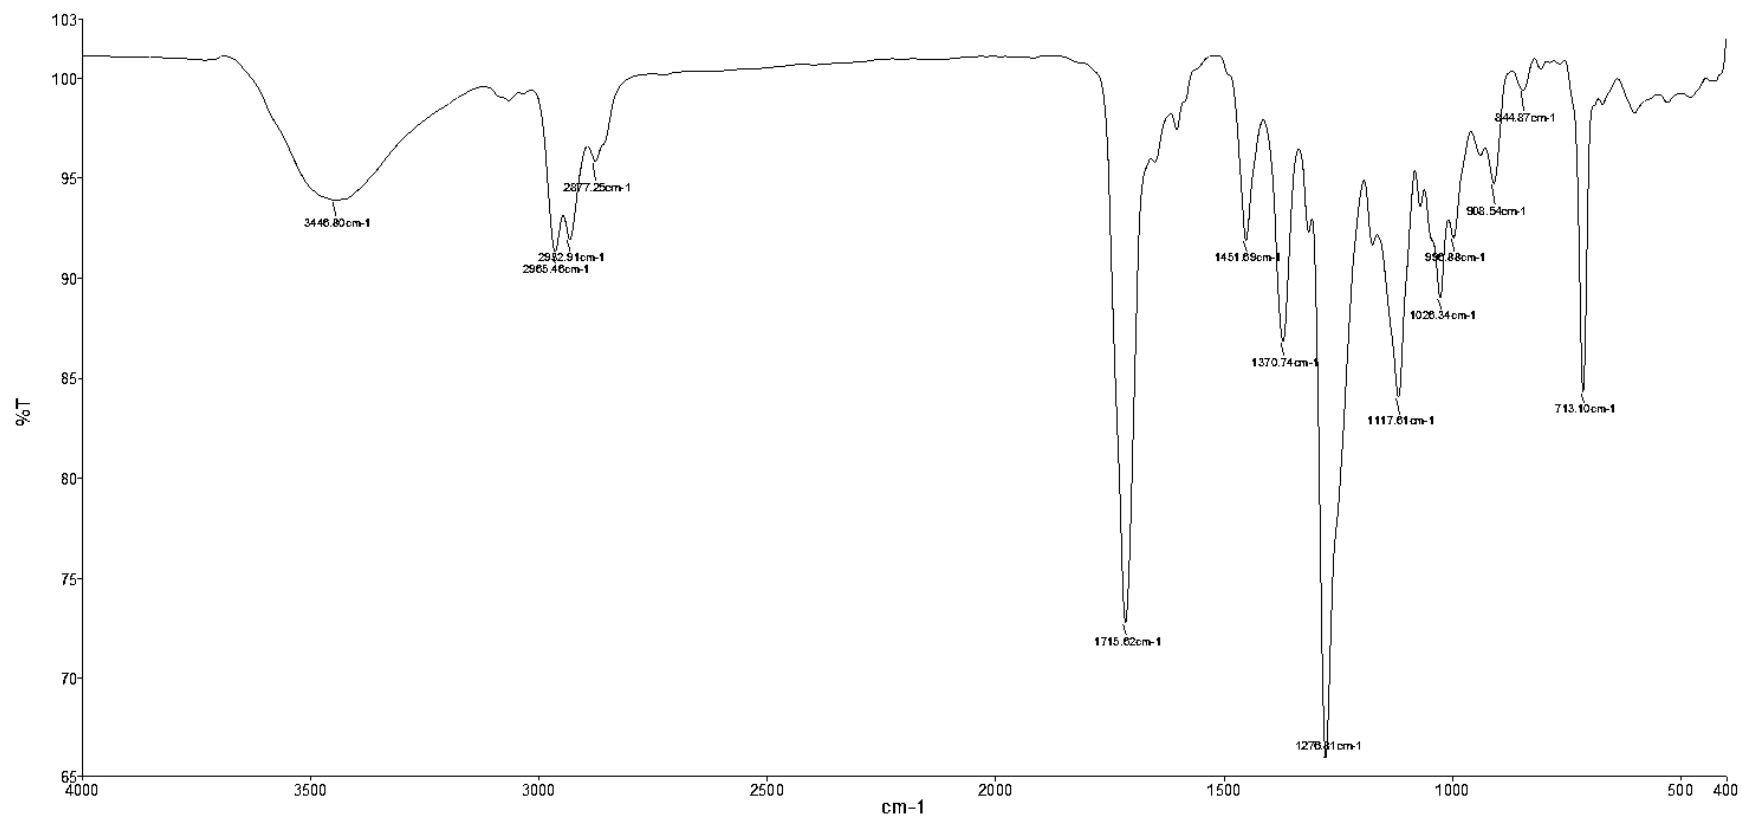

14. Figure S184–S217.

Figure S184. HPLC chromatogram of compound 1.

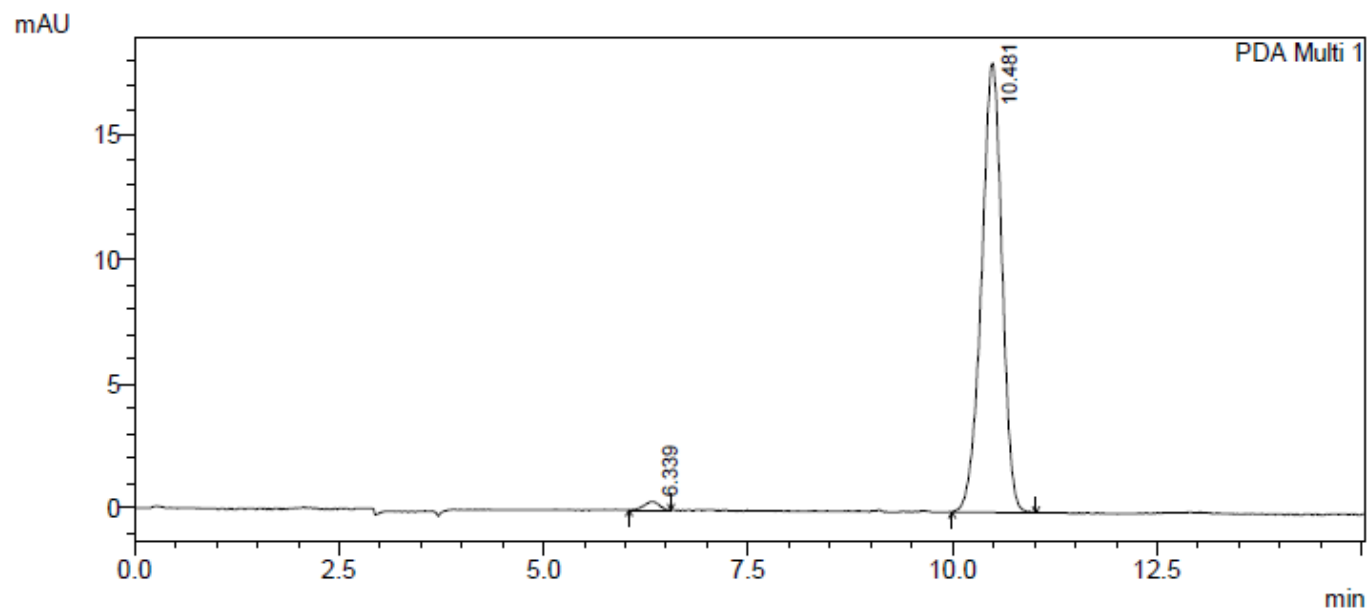

1 PDA Multi 1/254nm 4nm

PeakTable

PDA Ch1 254nm 4nm

| Peak# | Ret. Time | Area   | Height | Area %  | Height % |
|-------|-----------|--------|--------|---------|----------|
| 1     | 6.339     | 4496   | 354    | 1.407   | 1.924    |
| 2     | 10.481    | 314992 | 18061  | 98.593  | 98.076   |
| Total |           | 319488 | 18415  | 100.000 | 100.000  |

**Figure S185.** HPLC chromatogram of compound **2**.

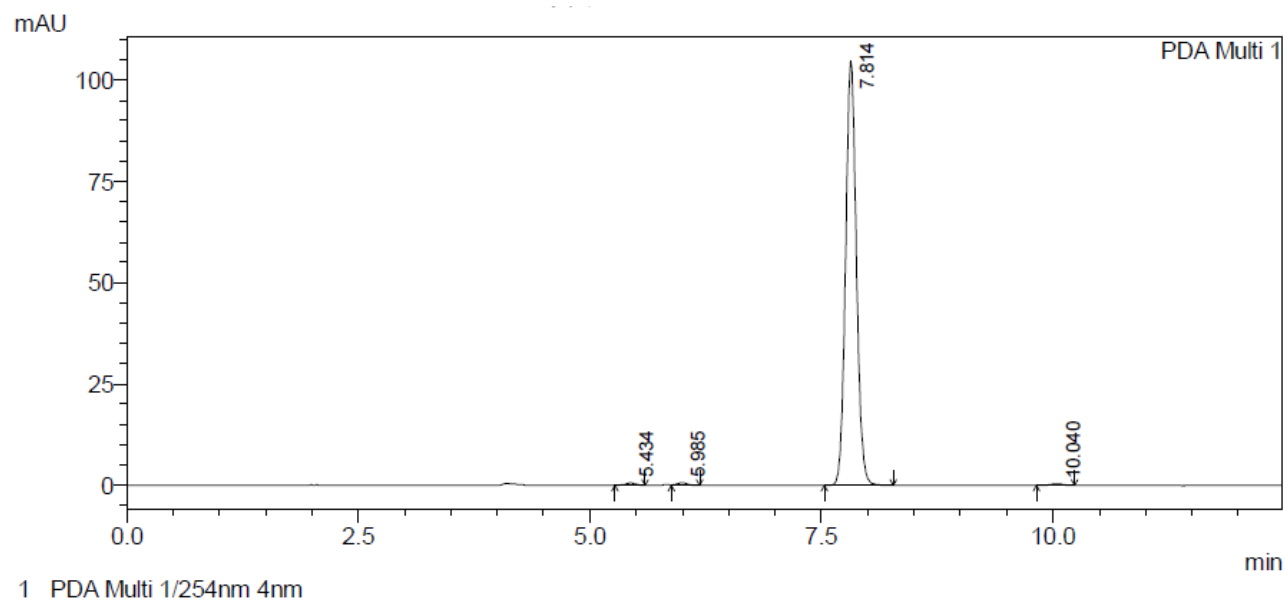

PeakTable

PDA Ch1 254nm 4nm

| Peak# | Ret. Time | Area   | Height | Area %  | Height % |
|-------|-----------|--------|--------|---------|----------|
| 1     | 5.434     | 4674   | 622    | 0.543   | 0.584    |
| 2     | 5.985     | 4821   | 675    | 0.560   | 0.634    |
| 3     | 7.814     | 847251 | 104774 | 98.461  | 98.424   |
| 4     | 10.040    | 3751   | 381    | 0.436   | 0.358    |
| Total |           | 860497 | 106452 | 100.000 | 100.000  |

Figure S186. HPLC chromatogram of compound 3.

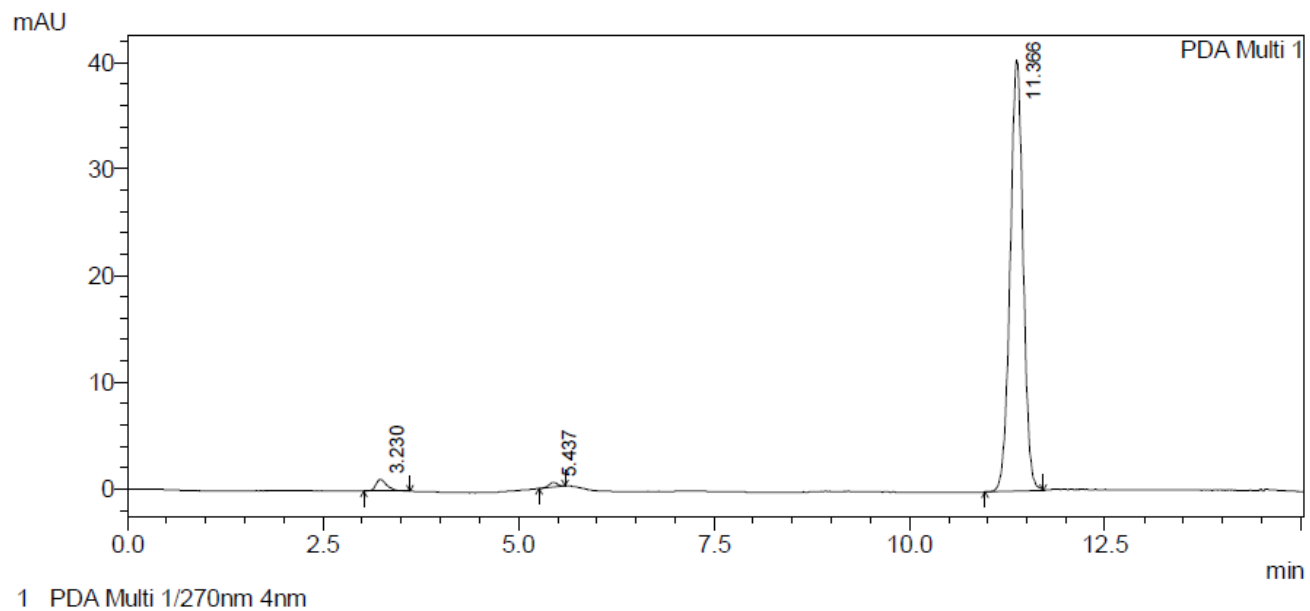

1 PDA Multi 1/270nm 4nm

PeakTable

PDA Ch1 270nm 4nm

| Peak# | Ret. Time | Area   | Height | Area %  | Height % |
|-------|-----------|--------|--------|---------|----------|
| 1     | 3.230     | 11430  | 1100   | 2.380   | 2.620    |
| 2     | 5.437     | 3311   | 459    | 0.689   | 1.094    |
| 3     | 11.366    | 465420 | 40422  | 96.930  | 96.286   |
| Total |           | 480160 | 41981  | 100.000 | 100.000  |

Figure S187. HPLC chromatogram of compound 4.

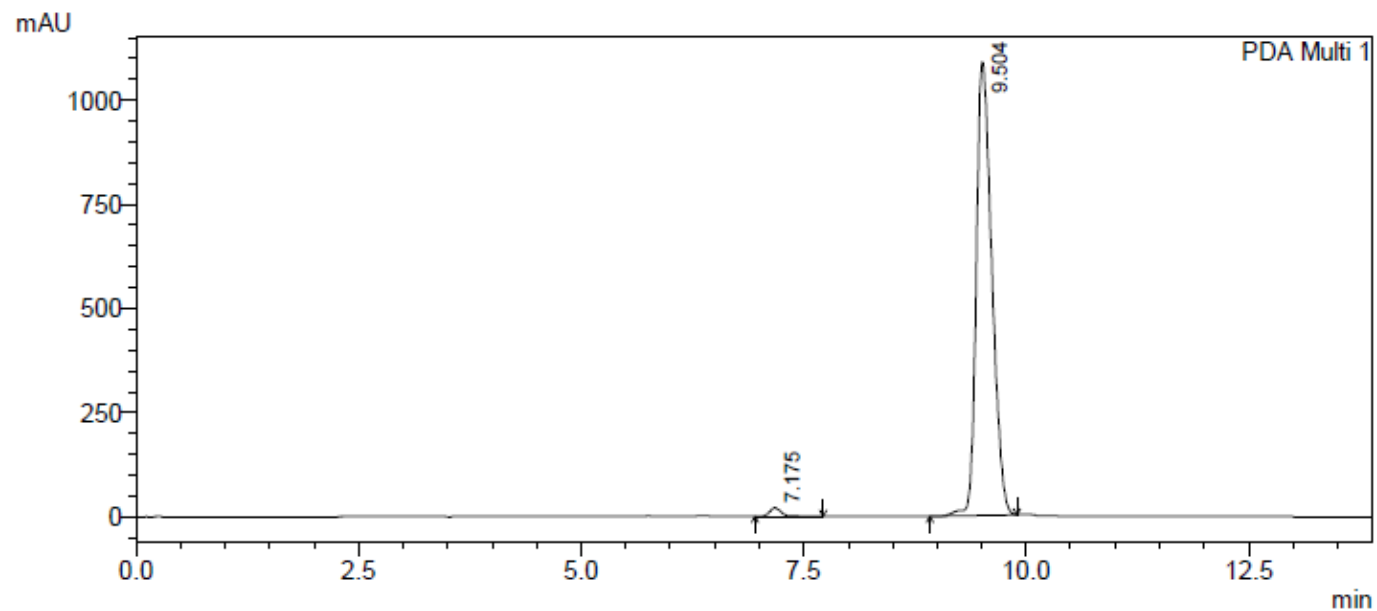

1 PDA Multi 1/254nm 4nm

PeakTable

PDA Ch1 254nm 4nm

| Peak# | Ret. Time | Area     | Height  | Area %  | Height % |
|-------|-----------|----------|---------|---------|----------|
| 1     | 7.175     | 199178   | 20692   | 1.483   | 1.866    |
| 2     | 9.504     | 13232976 | 1087970 | 98.517  | 98.134   |
| Total |           | 13432153 | 1108662 | 100.000 | 100.000  |

Figure S188. HPLC chromatogram of compound 5.

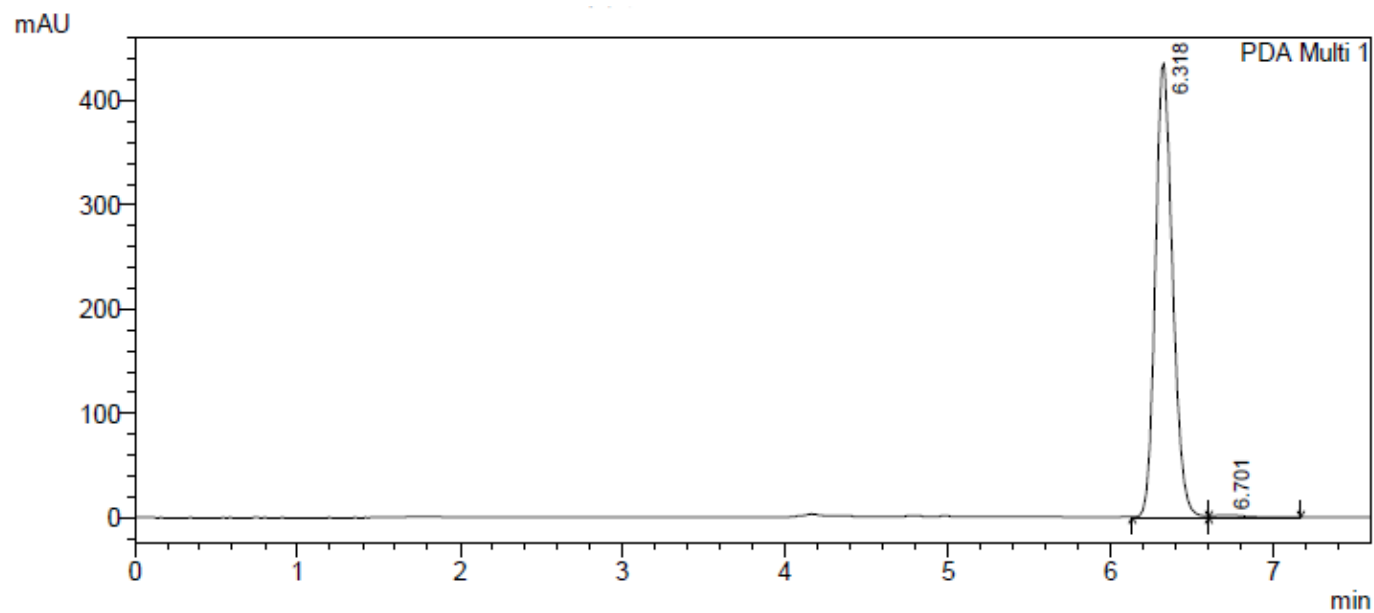

1 PDA Multi 1/254nm 4nm

PeakTable

PDA Ch1 254nm 4nm

| Peak# | Ret. Time | Area    | Height | Area %  | Height % |
|-------|-----------|---------|--------|---------|----------|
| 1     | 6.318     | 3232302 | 435588 | 99.190  | 99.489   |
| 2     | 6.701     | 26387   | 2239   | 0.810   | 0.511    |
| Total |           | 3258689 | 437827 | 100.000 | 100.000  |

Figure S189. HPLC chromatogram of compound 6.

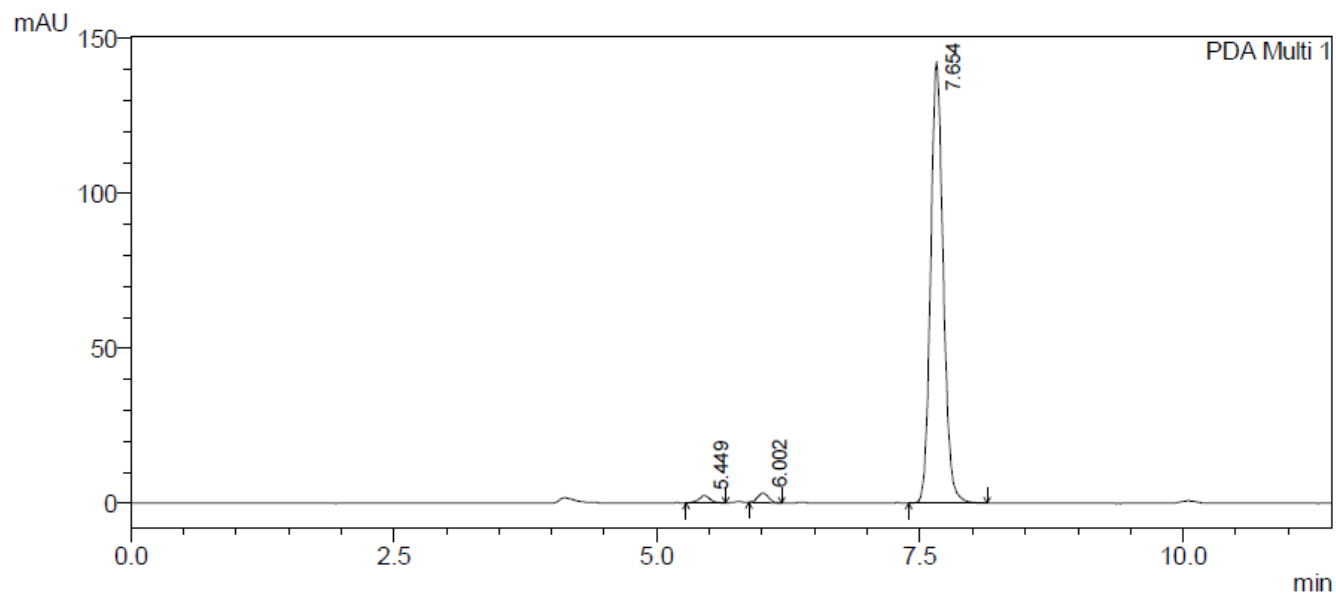

1 PDA Multi 1/254nm 4nm

PeakTable

PDA Ch1 254nm 4nm

| Peak# | Ret. Time | Area    | Height | Area %  | Height % |
|-------|-----------|---------|--------|---------|----------|
| 1     | 5.449     | 18499   | 2415   | 1.501   | 1.633    |
| 2     | 6.002     | 21813   | 3095   | 1.770   | 2.092    |
| 3     | 7.654     | 1192269 | 142418 | 96.729  | 96.275   |
| Total |           | 1232581 | 147928 | 100.000 | 100.000  |

Figure S190. HPLC chromatogram of compound 7.

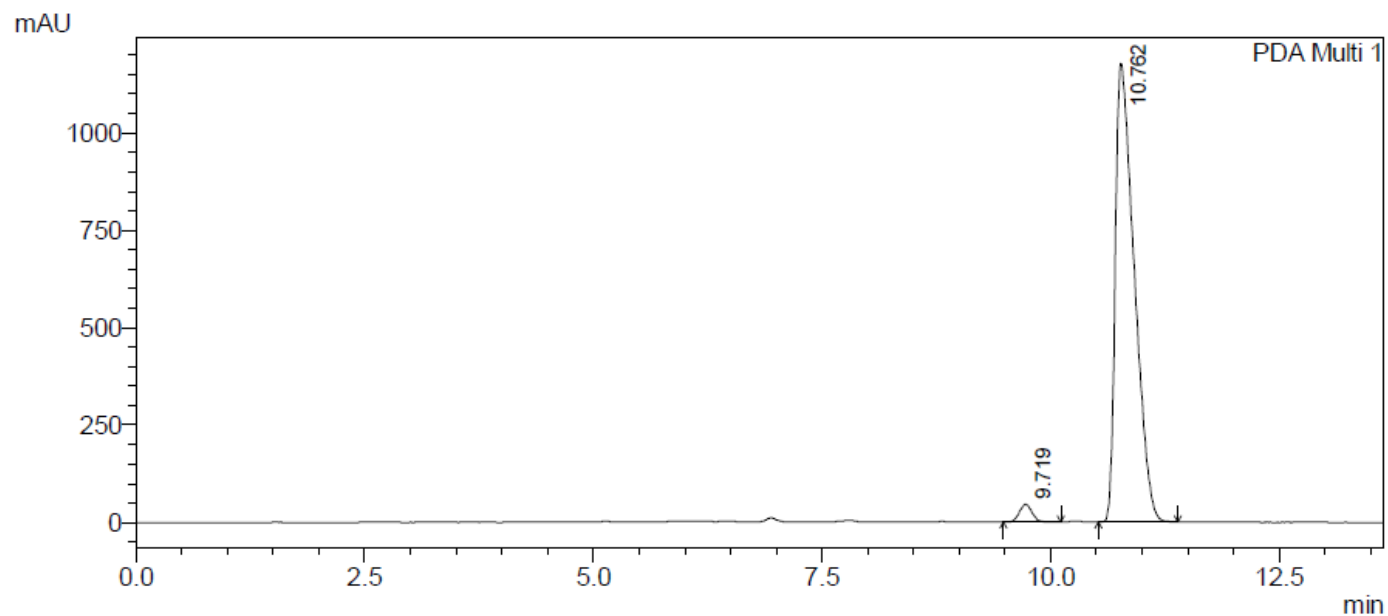

1 PDA Multi 1/254nm 4nm

PeakTable

PDA Ch1 254nm 4nm

| Peak# | Ret. Time | Area     | Height  | Area %  | Height % |
|-------|-----------|----------|---------|---------|----------|
| 1     | 9.719     | 446780   | 45549   | 2.571   | 3.724    |
| 2     | 10.762    | 16933731 | 1177476 | 97.429  | 96.276   |
| Total |           | 17380511 | 1223025 | 100.000 | 100.000  |



Figure S191. HPLC chromatogram of compound 8.

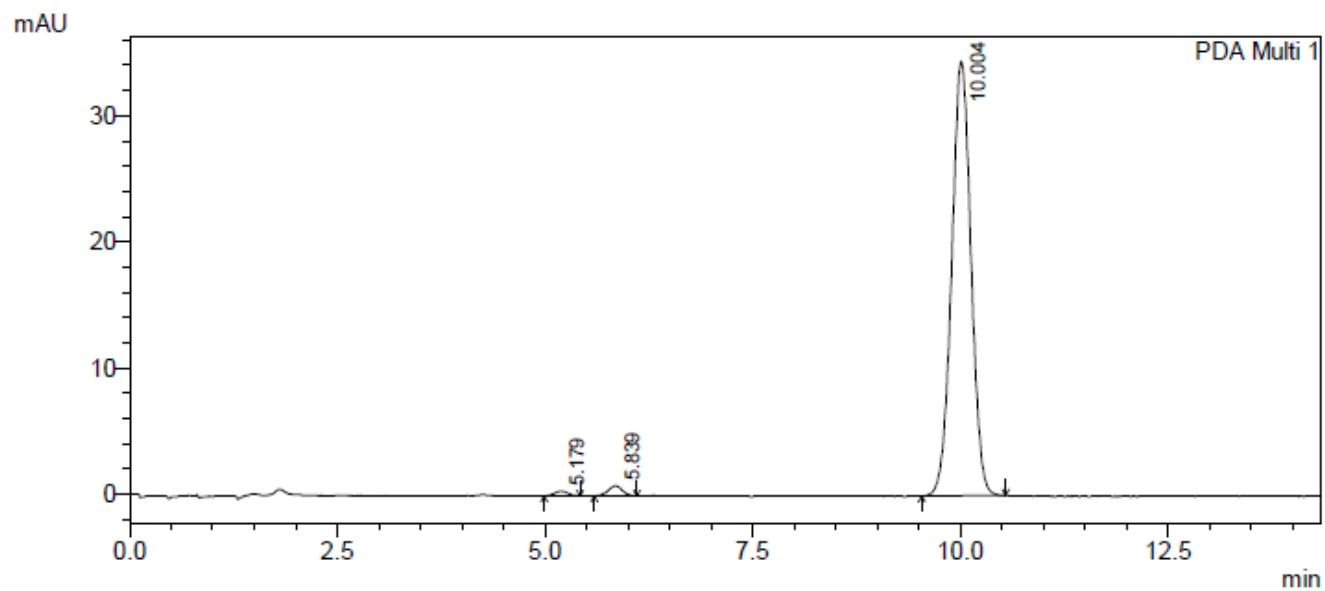

1 PDA Multi 1/254nm 4nm

PeakTable

PDA Ch1 254nm 4nm

| Peak# | Ret. Time | Area   | Height | Area %  | Height % |
|-------|-----------|--------|--------|---------|----------|
| 1     | 5.179     | 4144   | 387    | 0.726   | 1.086    |
| 2     | 5.839     | 9560   | 792    | 1.675   | 2.223    |
| 3     | 10.004    | 557220 | 34447  | 97.600  | 96.691   |
| Total |           | 570924 | 35625  | 100.000 | 100.000  |

Figure S192. HPLC chromatogram of compound 9.

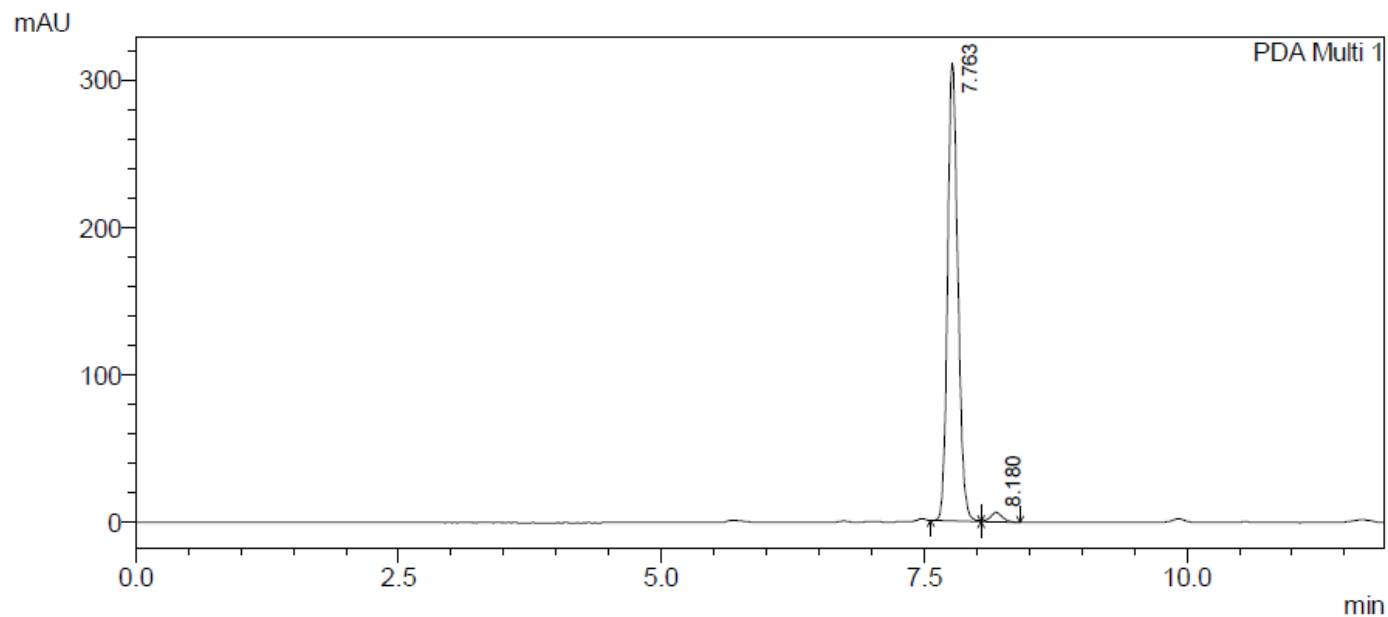

1 PDA Multi 1/254nm 4nm

PeakTable

PDA Ch1 254nm 4nm

| Peak# | Ret. Time | Area    | Height | Area %  | Height % |
|-------|-----------|---------|--------|---------|----------|
| 1     | 7.763     | 2109934 | 310314 | 97.701  | 97.970   |
| 2     | 8.180     | 49649   | 6430   | 2.299   | 2.030    |
| Total |           | 2159583 | 316743 | 100.000 | 100.000  |

Figure S193. HPLC chromatogram of compound 10.

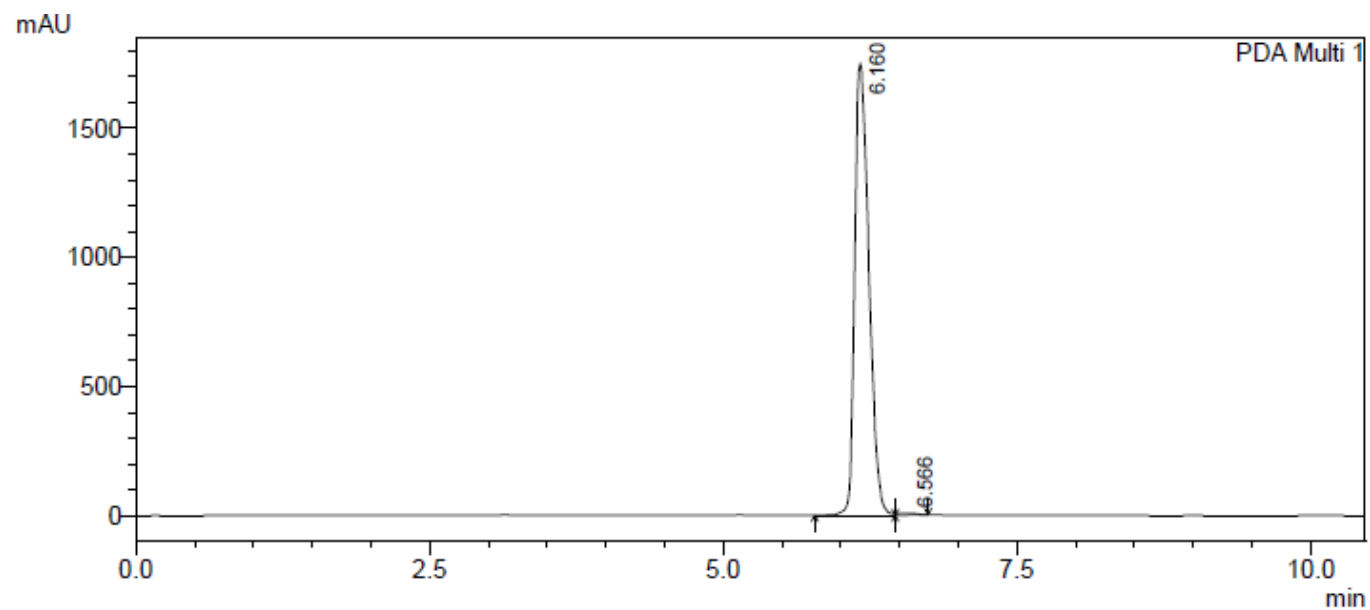

1 PDA Multi 1/254nm 4nm

PeakTable

PDA Ch1 254nm 4nm

| Peak# | Ret. Time | Area     | Height  | Area %  | Height % |
|-------|-----------|----------|---------|---------|----------|
| 1     | 6.160     | 14796090 | 1749577 | 99.478  | 99.575   |
| 2     | 6.566     | 77613    | 7471    | 0.522   | 0.425    |
| Total |           | 14873703 | 1757047 | 100.000 | 100.000  |

Figure S194. HPLC chromatogram of compound 11.

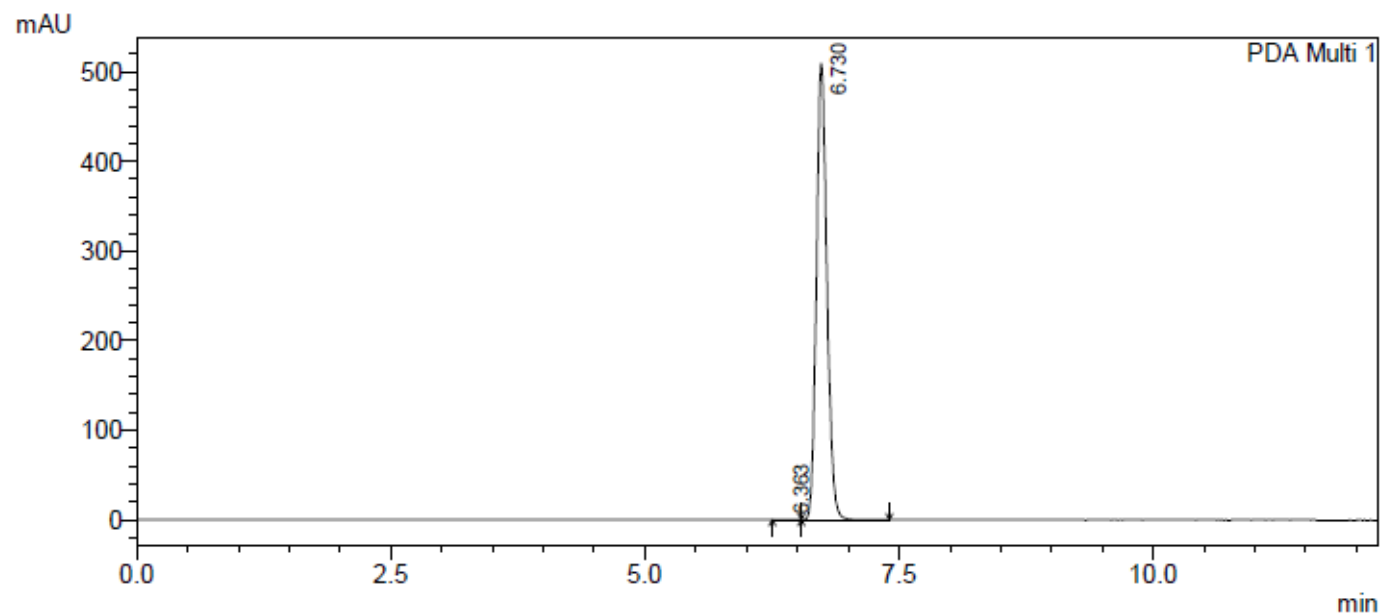

1 PDA Multi 1/254nm 4nm

PeakTable

PDA Ch1 254nm 4nm

| Peak# | Ret. Time | Area    | Height | Area %  | Height % |
|-------|-----------|---------|--------|---------|----------|
| 1     | 6.363     | 4729    | 664    | 0.128   | 0.130    |
| 2     | 6.730     | 3700248 | 508928 | 99.872  | 99.870   |
| Total |           | 3704977 | 509592 | 100.000 | 100.000  |

Figure S195. HPLC chromatogram of compound 12.

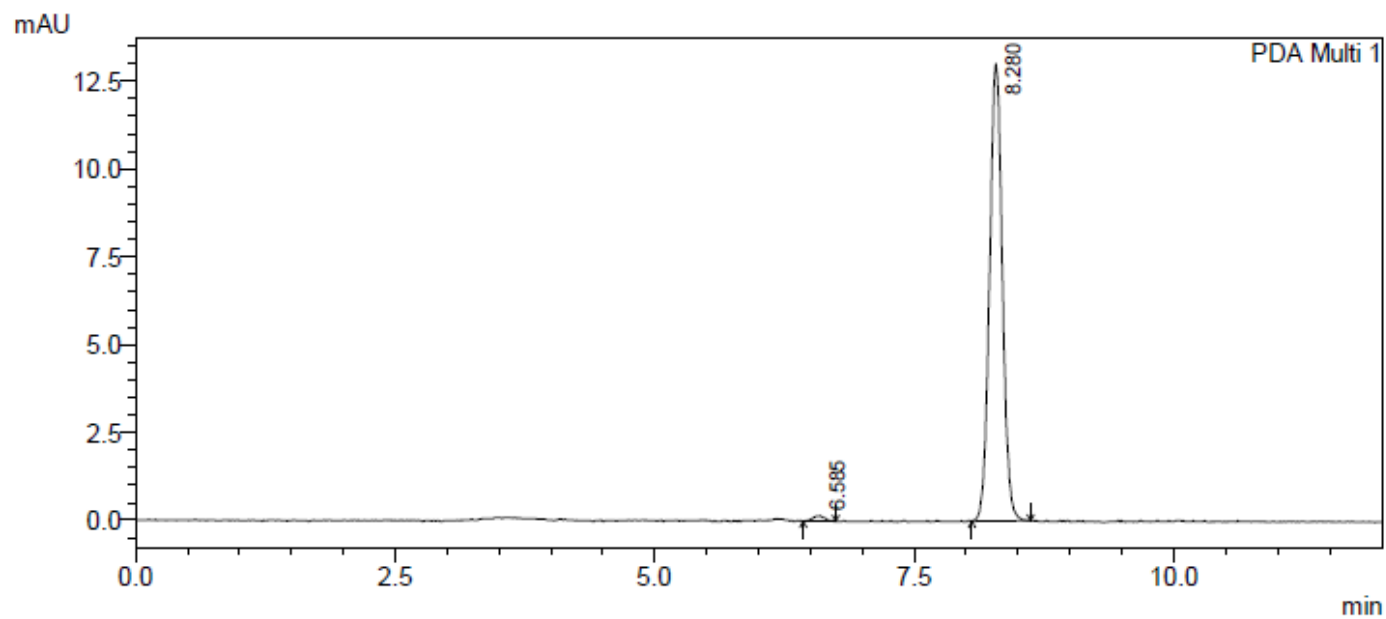

1 PDA Multi 1/254nm 4nm

PeakTable

PDA Ch1 254nm 4nm

| Peak# | Ret. Time | Area   | Height | Area %  | Height % |
|-------|-----------|--------|--------|---------|----------|
| 1     | 6.585     | 1272   | 156    | 1.126   | 1.182    |
| 2     | 8.280     | 111685 | 13008  | 98.874  | 98.818   |
| Total |           | 112957 | 13164  | 100.000 | 100.000  |

**Figure S196.** HPLC chromatogram of compound **13**.

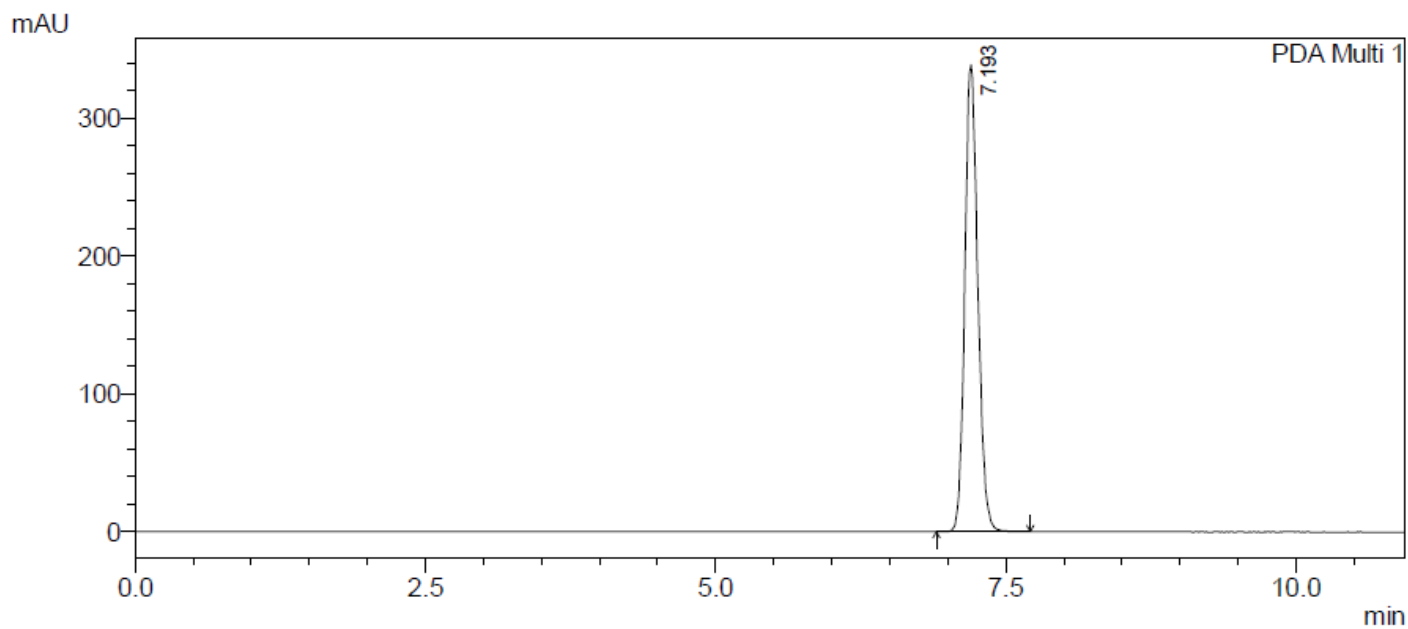

1 PDA Multi 1/254nm 4nm

PeakTable

PDA Ch1 254nm 4nm

| Peak# | Ret. Time | Area    | Height | Area %  | Height % |
|-------|-----------|---------|--------|---------|----------|
| 1     | 7.193     | 2645024 | 338696 | 100.000 | 100.000  |
| Total |           | 2645024 | 338696 | 100.000 | 100.000  |

Figure S197 HPLC chromatogram of compound 14.

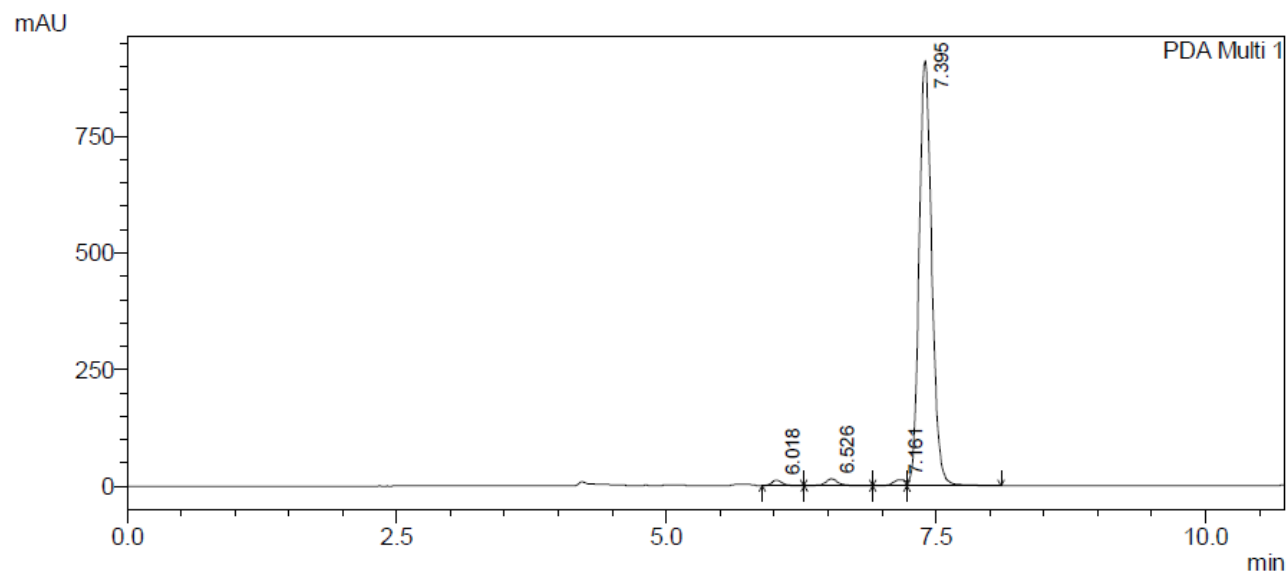

1 PDA Multi 1/254nm 4nm

PeakTable

PDA Ch1 254nm 4nm

| Peak# | Ret. Time | Area    | Height | Area %  | Height % |
|-------|-----------|---------|--------|---------|----------|
| 1     | 6.018     | 79856   | 11603  | 1.029   | 1.219    |
| 2     | 6.526     | 122597  | 14954  | 1.580   | 1.571    |
| 3     | 7.161     | 104765  | 13399  | 1.350   | 1.408    |
| 4     | 7.395     | 7454125 | 911740 | 96.042  | 95.802   |
| Total |           | 7761343 | 951696 | 100.000 | 100.000  |

Figure S198. HPLC chromatogram of compound 15.

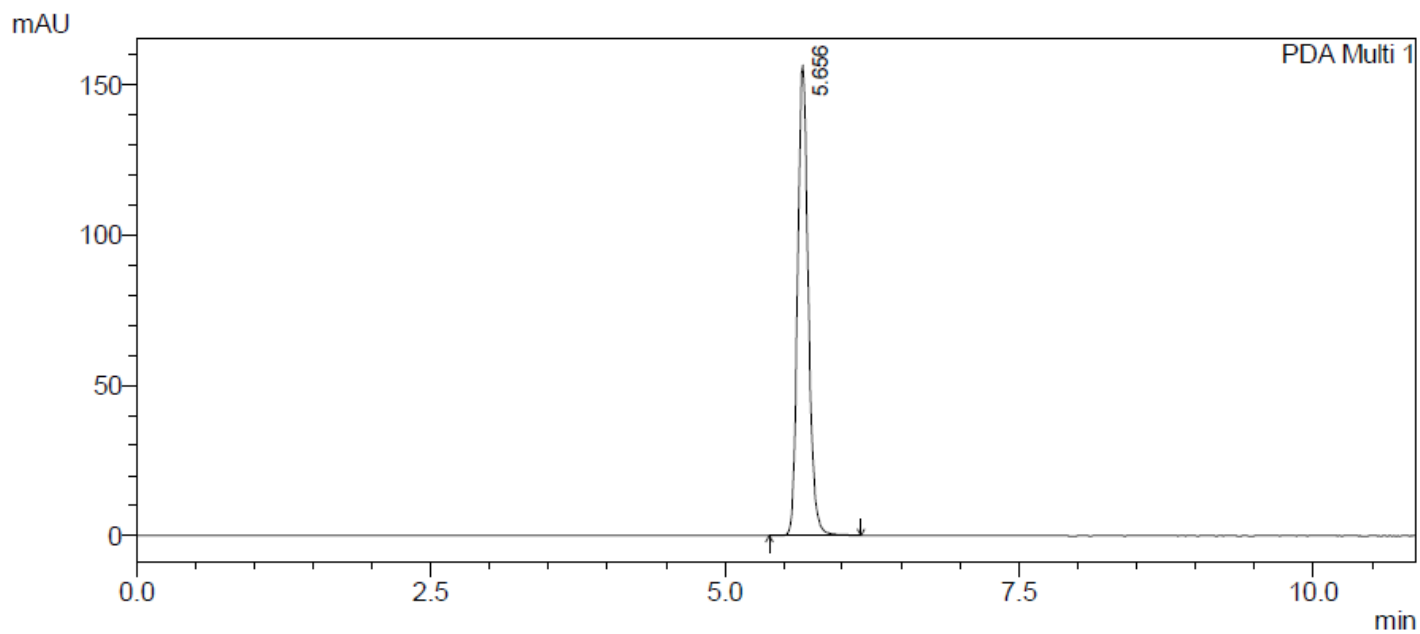

1 PDA Multi 1/254nm 4nm

PeakTable

PDA Ch1 254nm 4nm

| Peak# | Ret. Time | Area   | Height | Area %  | Height % |
|-------|-----------|--------|--------|---------|----------|
| 1     | 5.656     | 986989 | 156405 | 100.000 | 100.000  |
| Total |           | 986989 | 156405 | 100.000 | 100.000  |



**Figure S199.** HPLC chromatogram of compound **16**.

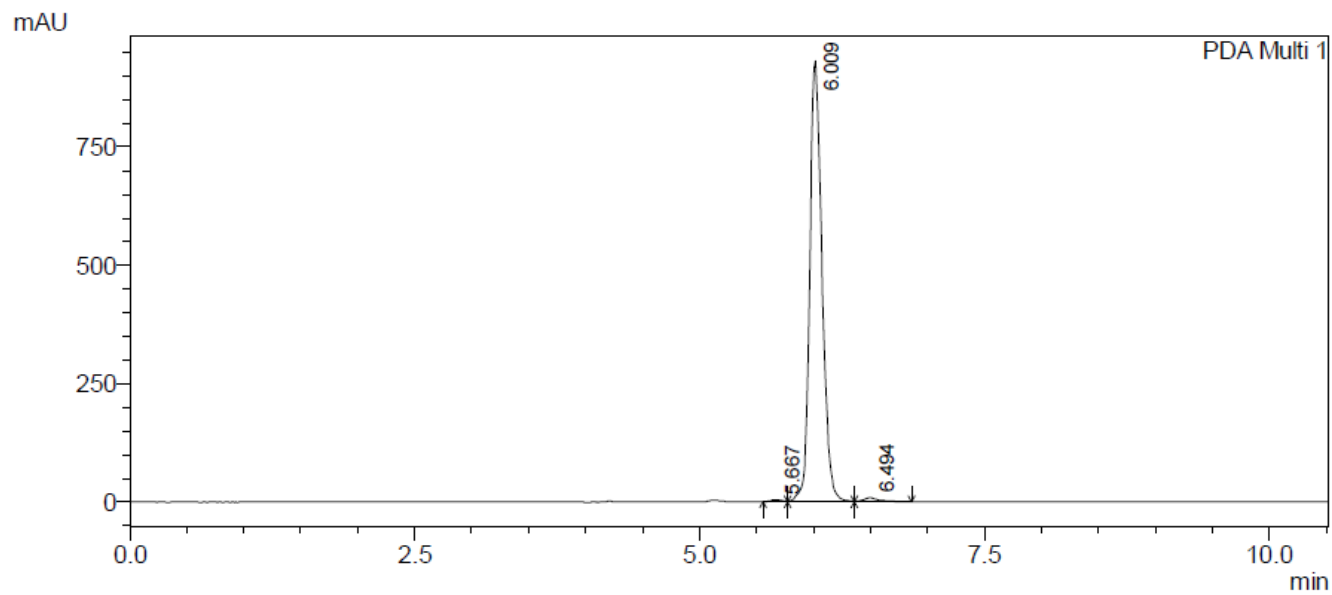

1 PDA Multi 1/254nm 4nm

PeakTable

PDA Ch1 254nm 4nm

| Peak# | Ret. Time | Area    | Height | Area %  | Height % |
|-------|-----------|---------|--------|---------|----------|
| 1     | 5.667     | 30081   | 4803   | 0.423   | 0.509    |
| 2     | 6.009     | 6998172 | 930653 | 98.312  | 98.579   |
| 3     | 6.494     | 90056   | 8608   | 1.265   | 0.912    |
| Total |           | 7118309 | 944063 | 100.000 | 100.000  |

**Figure S200.** HPLC chromatogram of compound **17**.

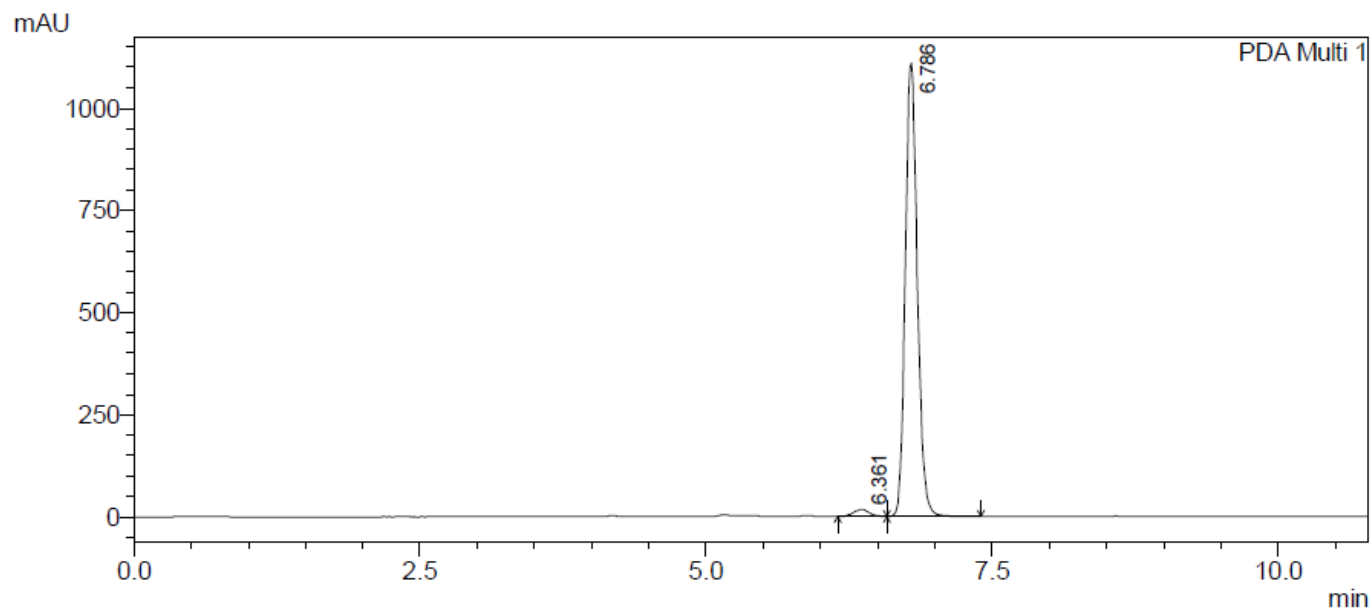

1 PDA Multi 1/254nm 4nm

PeakTable

PDA Ch1 254nm 4nm

| Peak# | Ret. Time | Area    | Height  | Area %  | Height % |
|-------|-----------|---------|---------|---------|----------|
| 1     | 6.361     | 164637  | 17505   | 1.981   | 1.553    |
| 2     | 6.786     | 8145381 | 1109415 | 98.019  | 98.447   |
| Total |           | 8310018 | 1126920 | 100.000 | 100.000  |

Figure S201. HPLC chromatogram of compound 18.

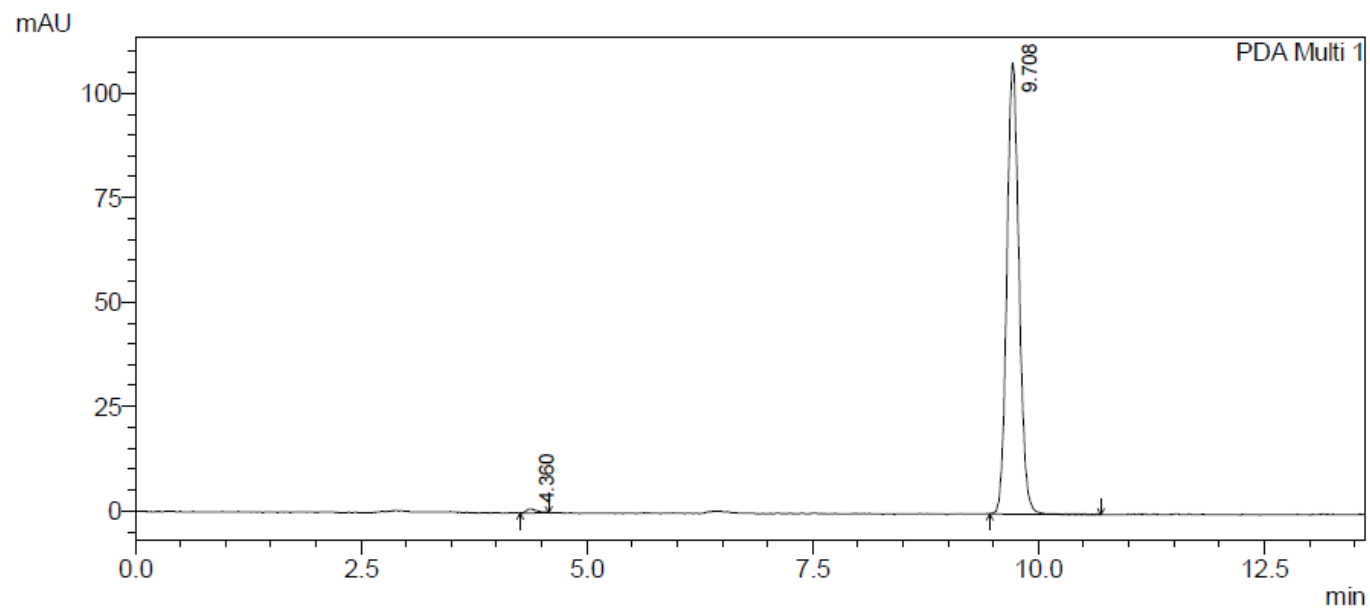

1 PDA Multi 1/200nm 4nm

PeakTable

PDA Ch1 200nm 4nm

| Peak# | Ret. Time | Area    | Height | Area %  | Height % |
|-------|-----------|---------|--------|---------|----------|
| 1     | 4.360     | 8353    | 1005   | 0.822   | 0.922    |
| 2     | 9.708     | 1008155 | 107962 | 99.178  | 99.078   |
| Total |           | 1016508 | 108967 | 100.000 | 100.000  |

Figure S202. HPLC chromatogram of compound 19.

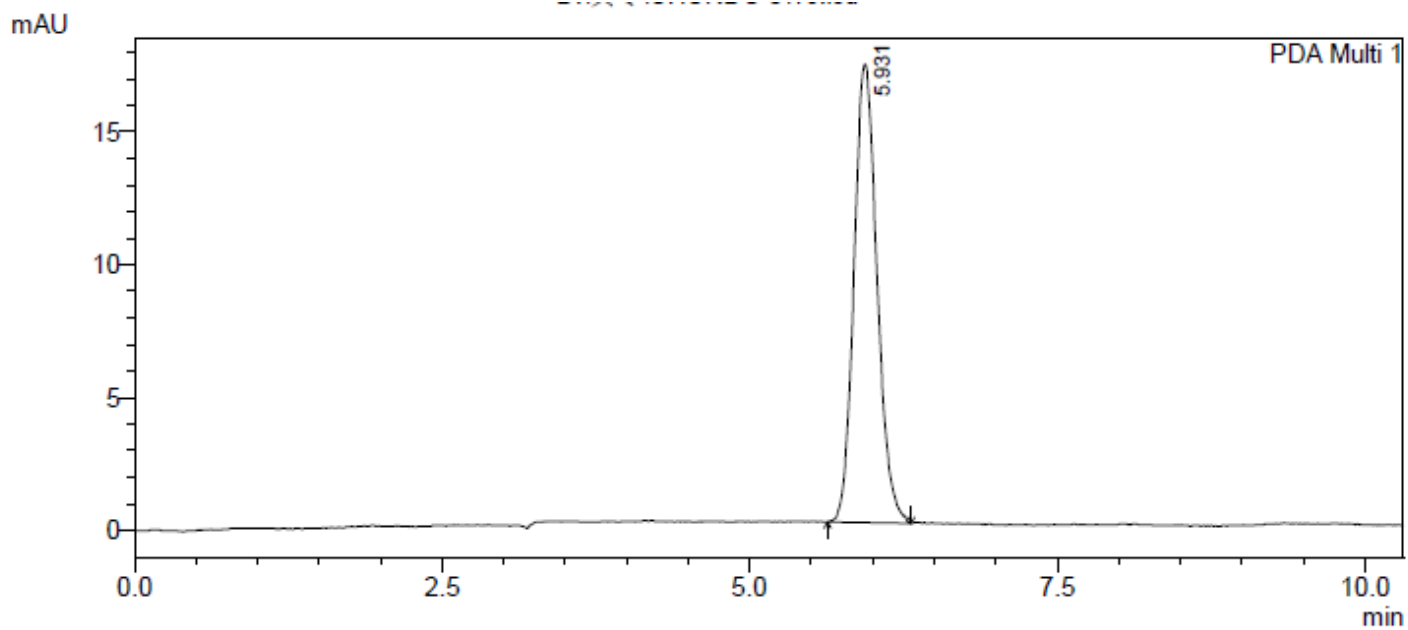

1 PDA Multi 1/254nm 4nm

PeakTable

PDA Ch1 254nm 4nm

| Peak# | Ret. Time | Area   | Height | Area %  | Height % |
|-------|-----------|--------|--------|---------|----------|
| 1     | 5.931     | 224884 | 17222  | 100.000 | 100.000  |
| Total |           | 224884 | 17222  | 100.000 | 100.000  |

Figure S203. HPLC chromatogram of compound 20.

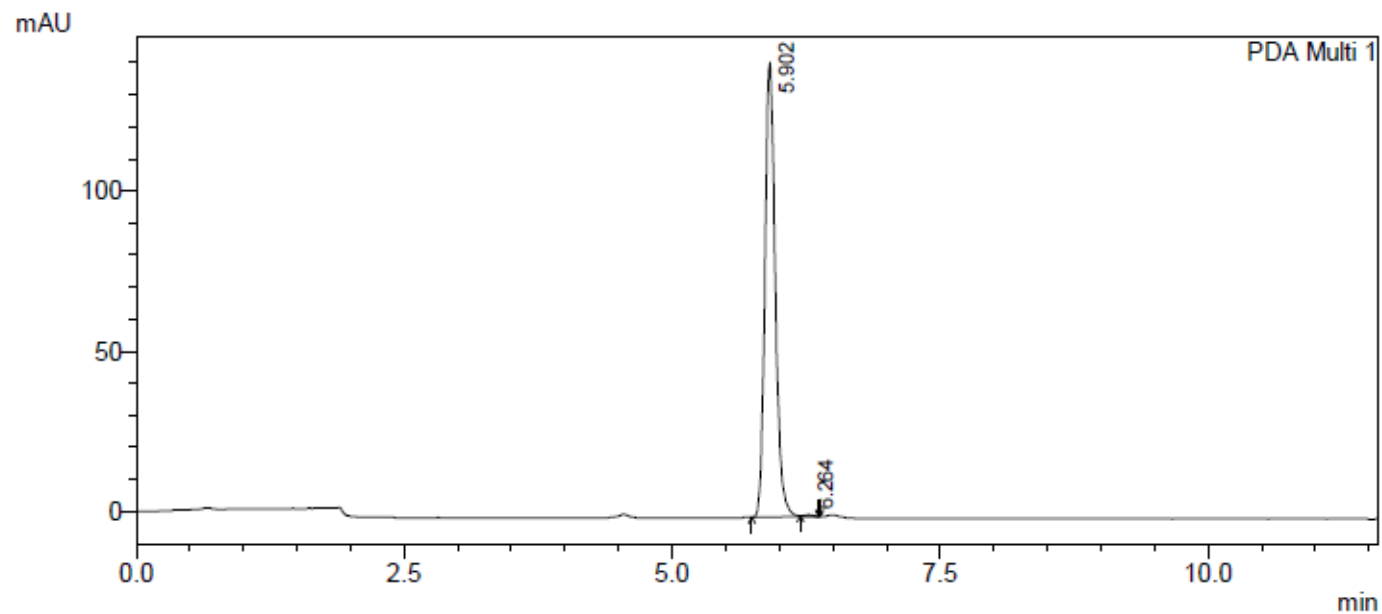

1 PDA Multi 1/254nm 4nm

PeakTable

PDA Ch1 254nm 4nm

| Peak# | Ret. Time | Area   | Height | Area %  | Height % |
|-------|-----------|--------|--------|---------|----------|
| 1     | 5.902     | 956162 | 141690 | 99.750  | 99.673   |
| 2     | 6.264     | 2394   | 465    | 0.250   | 0.327    |
| Total |           | 958556 | 142155 | 100.000 | 100.000  |

Figure S204. HPLC chromatogram of compound 21.

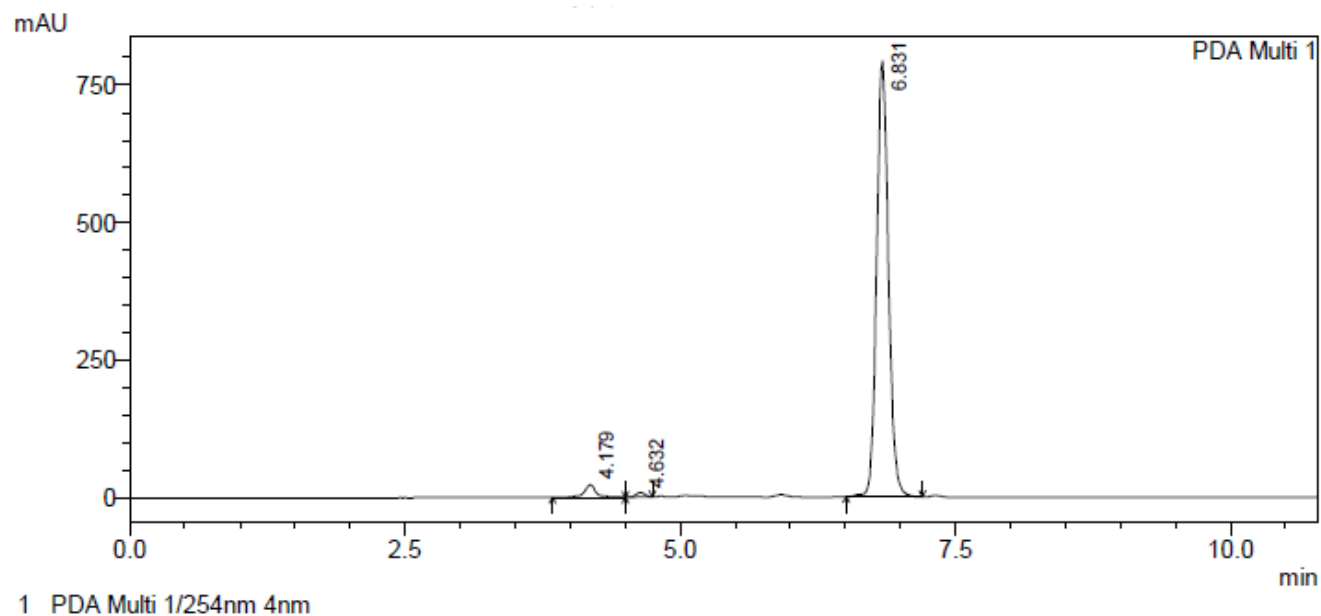

PeakTable

PDA Ch1 254nm 4nm

| Peak# | Ret. Time | Area    | Height | Area %  | Height % |
|-------|-----------|---------|--------|---------|----------|
| 1     | 4.179     | 169276  | 22854  | 2.740   | 2.777    |
| 2     | 4.632     | 43187   | 7946   | 0.699   | 0.965    |
| 3     | 6.831     | 5964411 | 792284 | 96.560  | 96.258   |
| Total |           | 6176874 | 823084 | 100.000 | 100.000  |

Figure S205. HPLC chromatogram of compound 22.

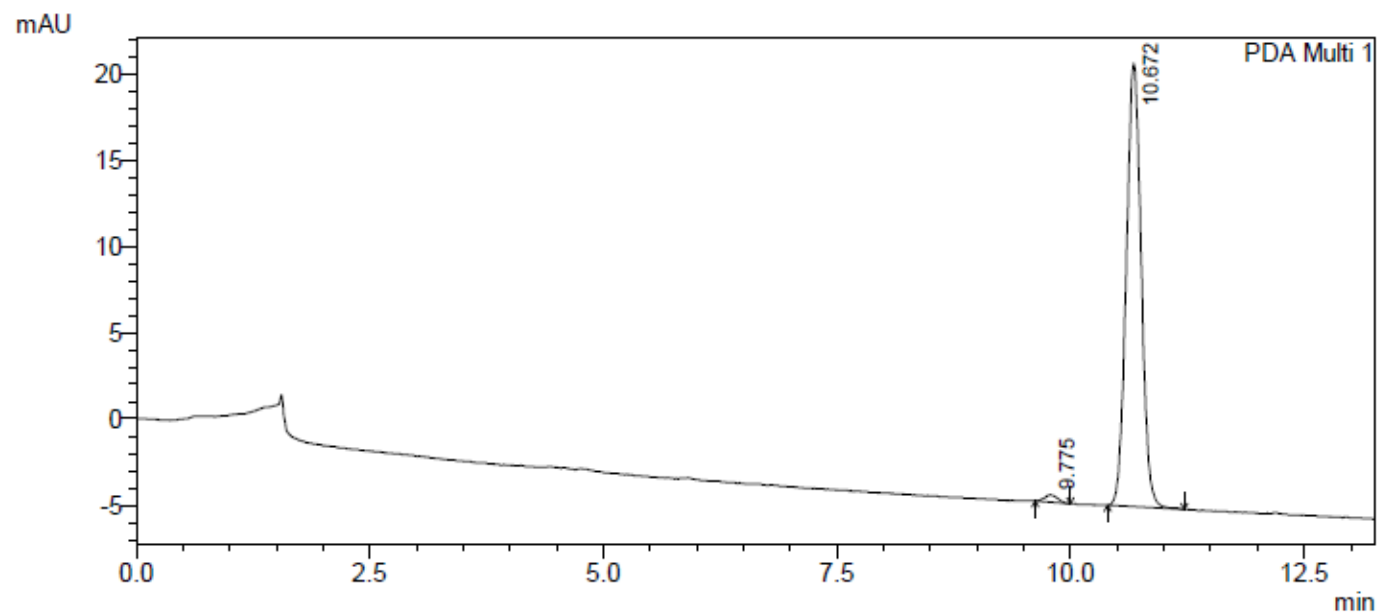

1 PDA Multi 1/254nm 4nm

PeakTable

PDA Ch1 254nm 4nm

| Peak# | Ret. Time | Area   | Height | Area %  | Height % |
|-------|-----------|--------|--------|---------|----------|
| 1     | 9.775     | 4233   | 428    | 1.460   | 1.639    |
| 2     | 10.672    | 285708 | 25678  | 98.540  | 98.361   |
| Total |           | 289941 | 26106  | 100.000 | 100.000  |

Figure S206. HPLC chromatogram of compound 23.

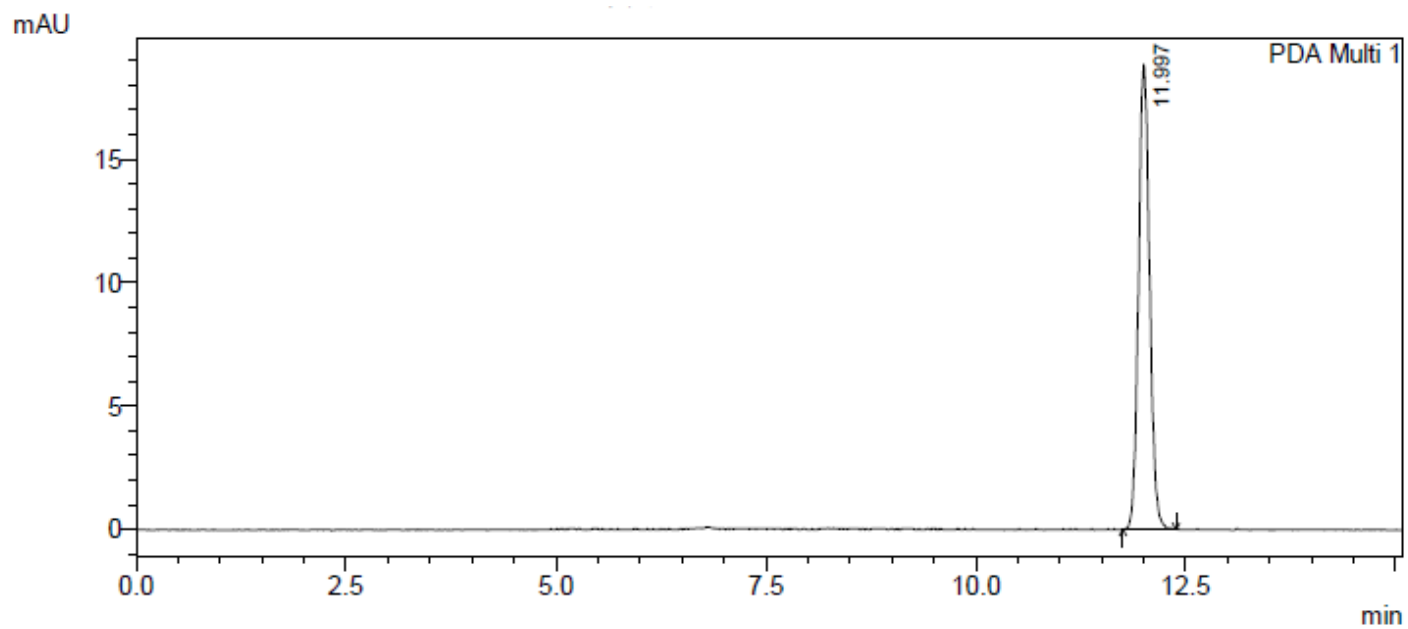

1 PDA Multi 1/254nm 4nm

PeakTable

PDA Ch1 254nm 4nm

| Peak# | Ret. Time | Area   | Height | Area %  | Height % |
|-------|-----------|--------|--------|---------|----------|
| 1     | 11.997    | 174401 | 18827  | 100.000 | 100.000  |
| Total |           | 174401 | 18827  | 100.000 | 100.000  |



Figure S207. HPLC chromatogram of compound 24.

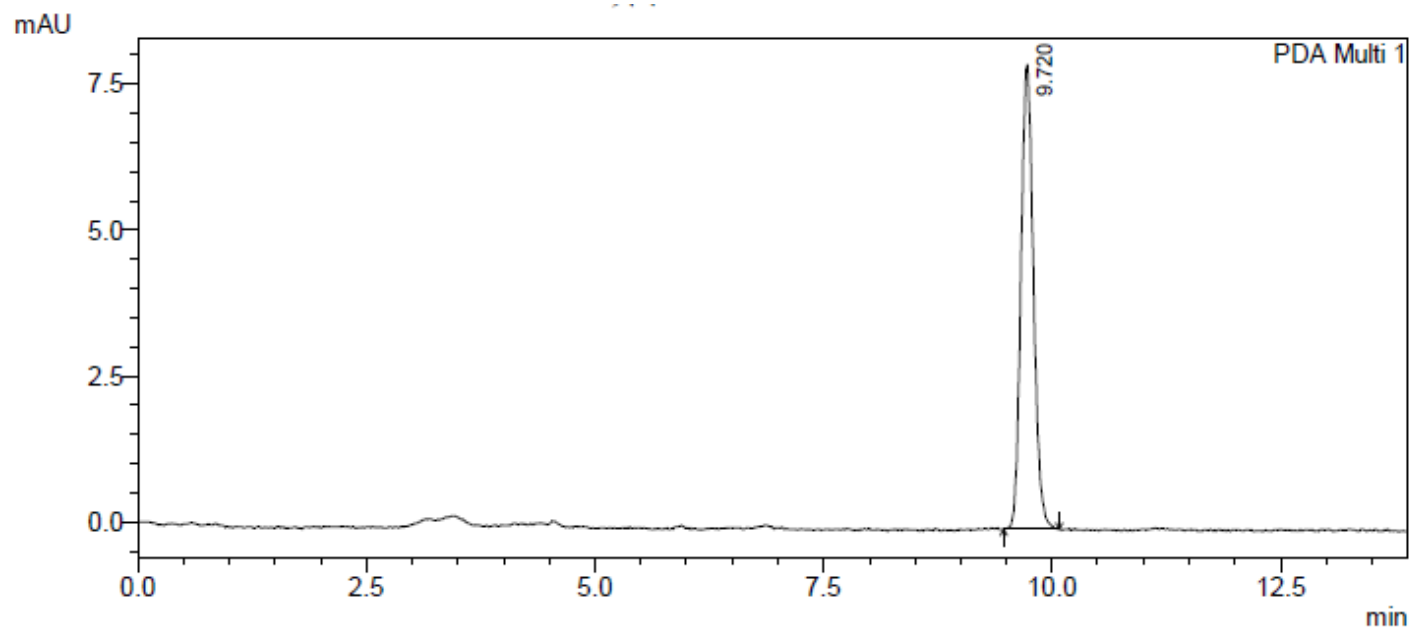

1 PDA Multi 1/254nm 4nm

PeakTable

PDA Ch1 254nm 4nm

| Peak# | Ret. Time | Area  | Height | Area %  |
|-------|-----------|-------|--------|---------|
| 1     | 9.720     | 75775 | 7942   | 100.000 |
| Total |           | 75775 | 7942   | 100.000 |

Figure S208. HPLC chromatogram of compound 25.

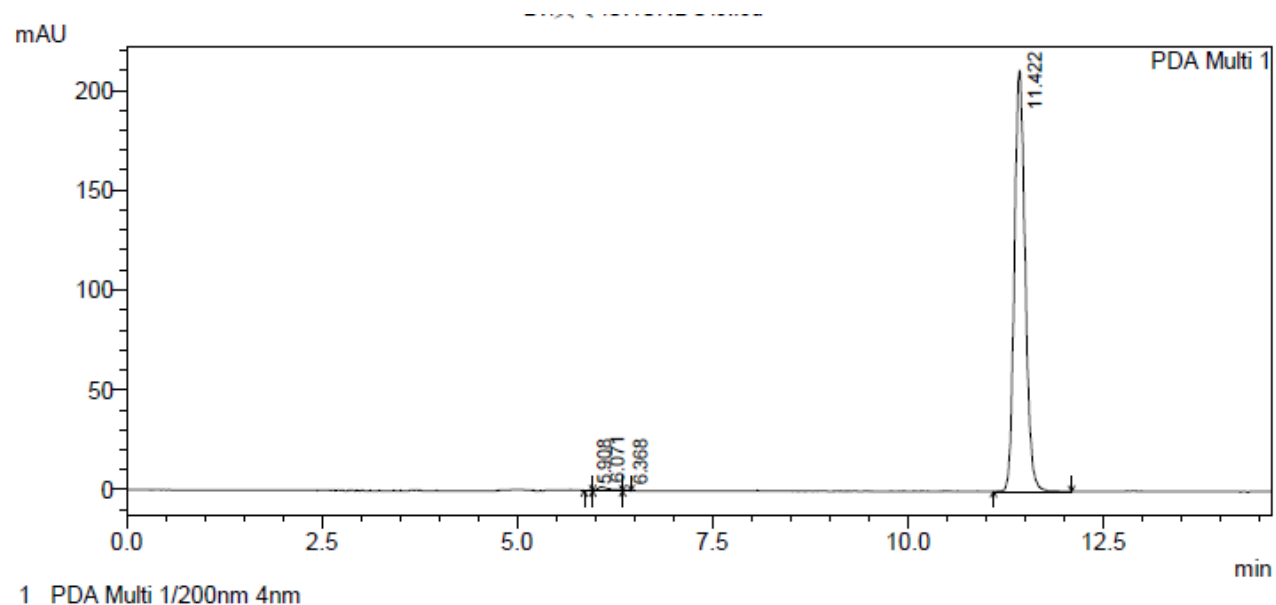

1 PDA Multi 1/200nm 4nm

PeakTable

| Peak# | Ret. Time | Area    | Height | Area %  |
|-------|-----------|---------|--------|---------|
| 1     | 5.908     | 205     | 81     | 0.010   |
| 2     | 6.071     | 18770   | 1974   | 0.917   |
| 3     | 6.368     | 995     | 286    | 0.049   |
| 4     | 11.422    | 2026277 | 210696 | 99.024  |
| Total |           | 2046248 | 213036 | 100.000 |

Figure S209. HPLC chromatogram of compound 26.

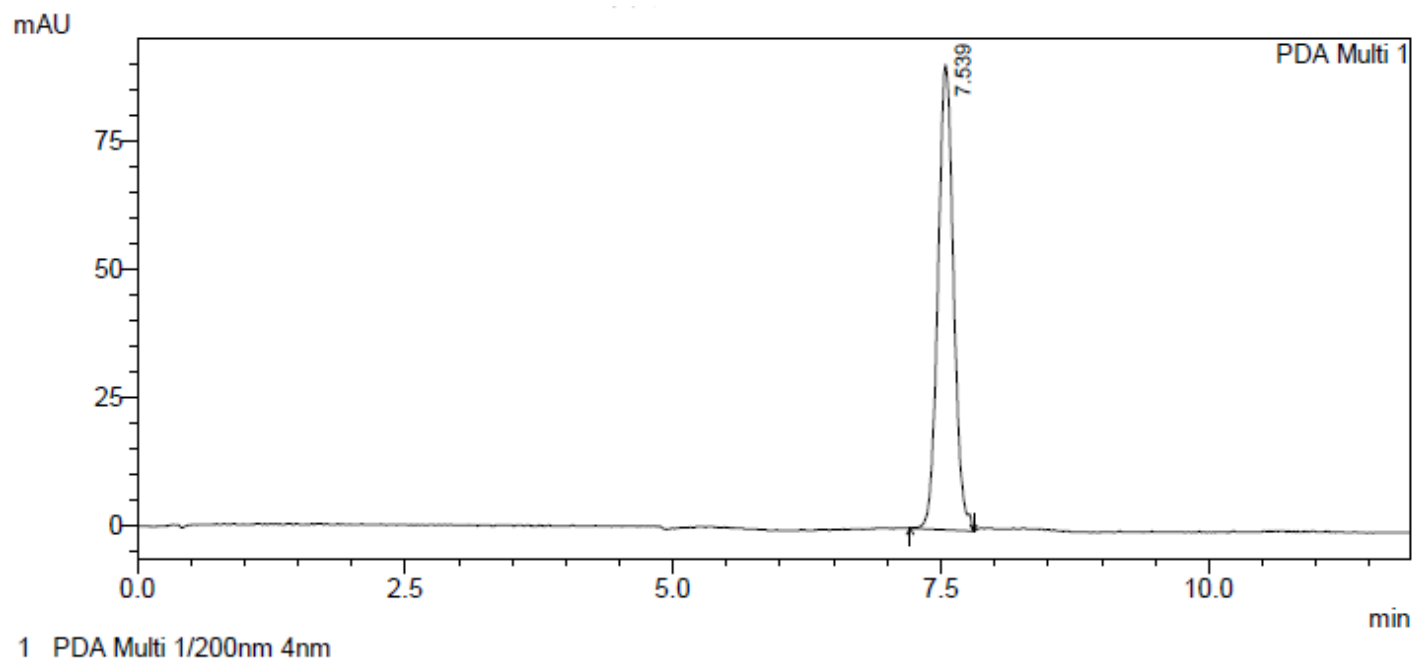

1 PDA Multi 1/200nm 4nm

PeakTable

PDA Ch1 200nm 4nm

| Peak# | Ret. Time | Area   | Height | Area %  | Height % |
|-------|-----------|--------|--------|---------|----------|
| 1     | 7.539     | 918343 | 90398  | 100.000 | 100.000  |
| Total |           | 918343 | 90398  | 100.000 | 100.000  |

Figure S210. HPLC chromatogram of compound 27.

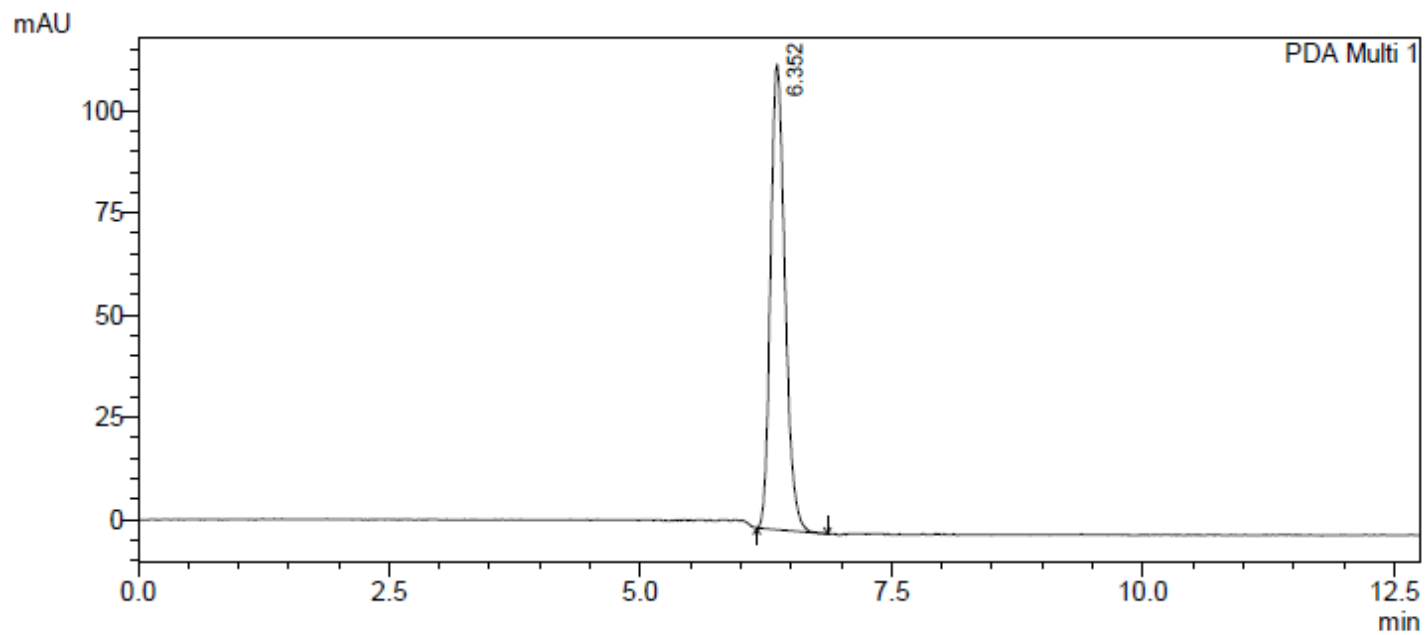

1 PDA Multi 1/200nm 4nm

PeakTable

PDA Ch1 200nm 4nm

| Peak# | Ret. Time | Area    | Height | Area %  | Height % |
|-------|-----------|---------|--------|---------|----------|
| 1     | 6.352     | 1133223 | 113671 | 100.000 | 100.000  |
| Total |           | 1133223 | 113671 | 100.000 | 100.000  |

Figure S211. HPLC chromatogram of compound 28.

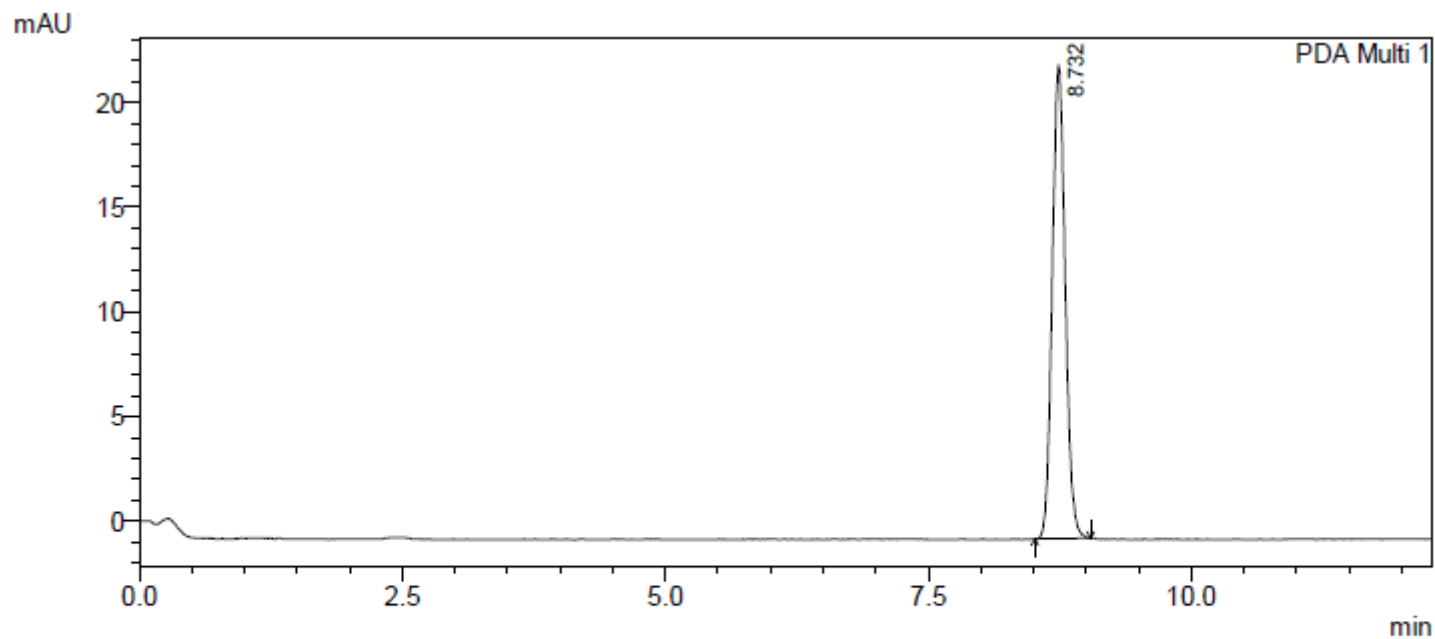

1 PDA Multi 1/254nm 4nm

PeakTable

PDA Ch1 254nm 4nm

| Peak# | Ret. Time | Area   | Height | Area %  | Height % |
|-------|-----------|--------|--------|---------|----------|
| 1     | 8.732     | 194599 | 22663  | 100.000 | 100.000  |
| Total |           | 194599 | 22663  | 100.000 | 100.000  |

Figure S212. HPLC chromatogram of compound 29.

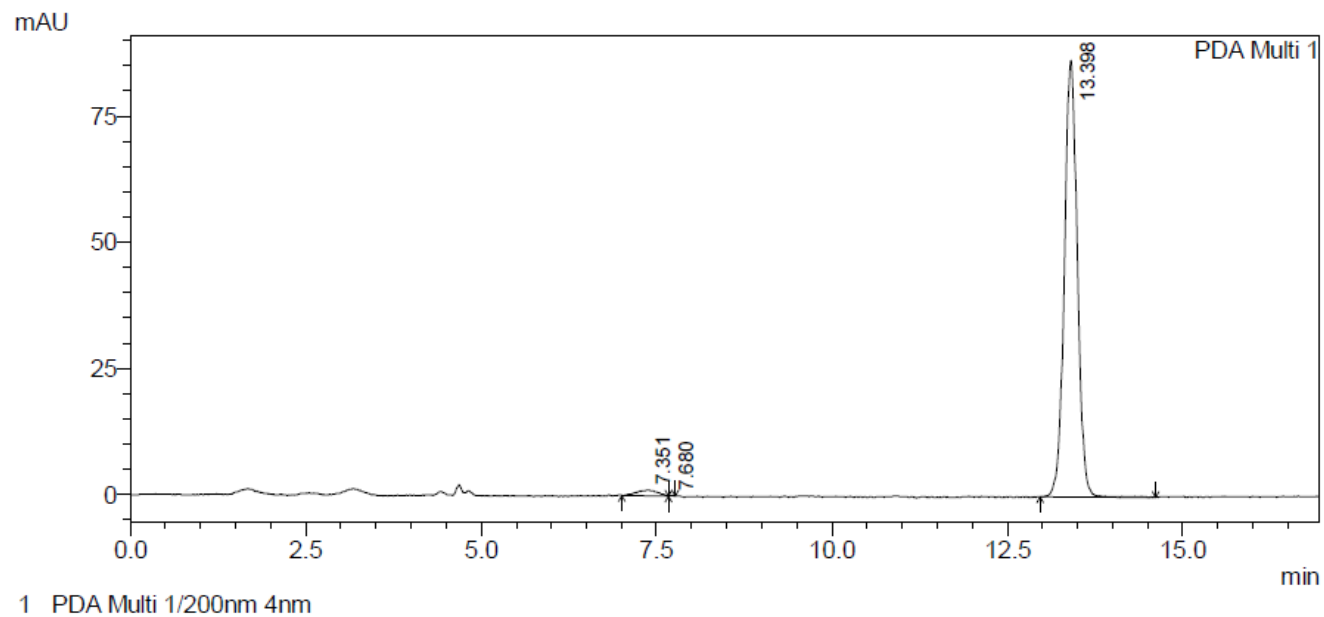

PeakTable

PDA Ch1 200nm 4nm

| Peak# | Ret. Time | Area    | Height | Area %  | Height % |
|-------|-----------|---------|--------|---------|----------|
| 1     | 7.351     | 24356   | 1173   | 2.150   | 1.335    |
| 2     | 7.680     | 493     | 171    | 0.044   | 0.194    |
| 3     | 13.398    | 1107914 | 86458  | 97.806  | 98.470   |
| Total |           | 1132763 | 87801  | 100.000 | 100.000  |

Figure S213. HPLC chromatogram of compound 30.

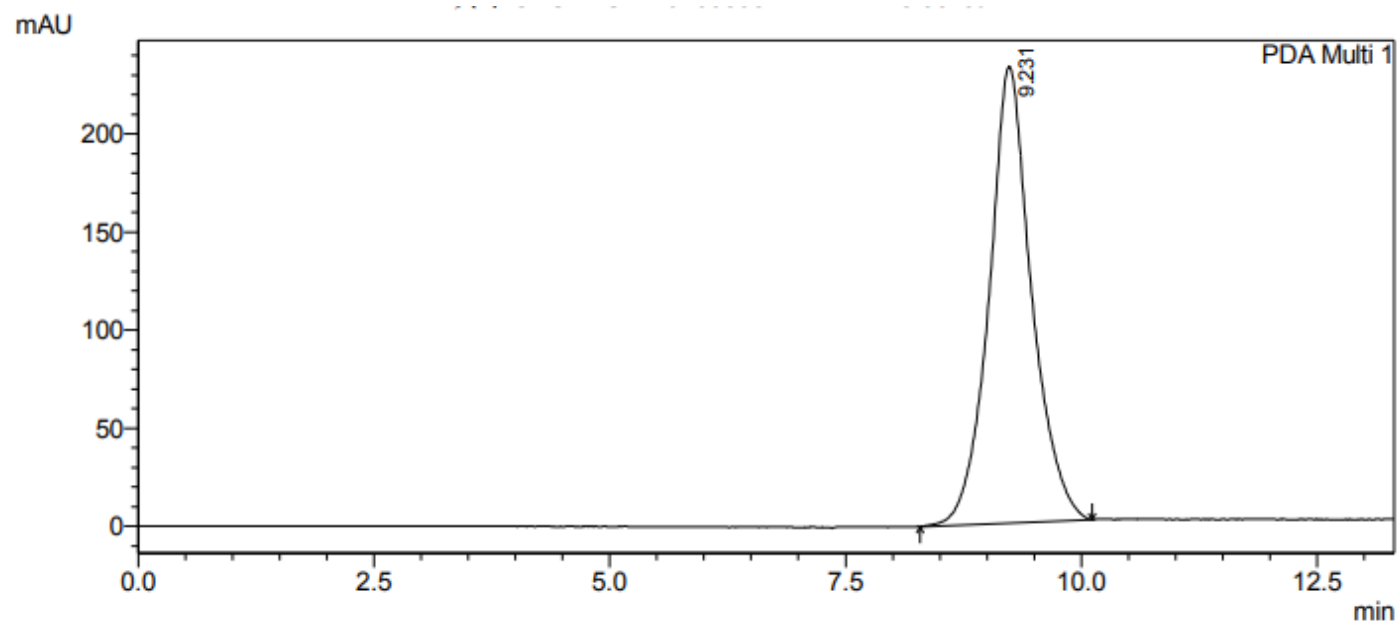

1 PDA Multi 1/200nm 4nm

PeakTable

PDA Ch1 200nm 4nm

| Peak# | Ret. Time | Area    | Height | Area %  | Height % |
|-------|-----------|---------|--------|---------|----------|
| 1     | 9.231     | 7300284 | 232753 | 100.000 | 100.000  |
| Total |           | 7300284 | 232753 | 100.000 | 100.000  |

Figure S214. HPLC chromatogram of compound 31.

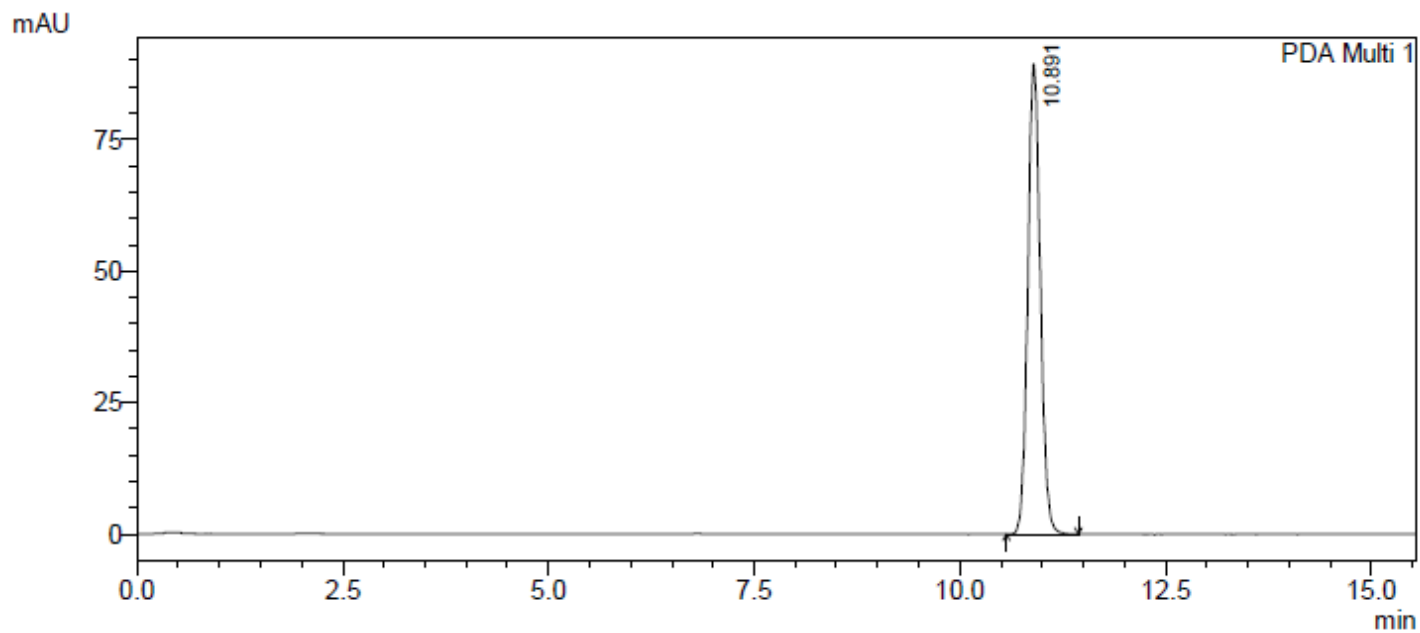

1 PDA Multi 1/254nm 4nm

PeakTable

PDA Ch1 254nm 4nm

| Peak# | Ret. Time | Area   | Height | Area %  |
|-------|-----------|--------|--------|---------|
| 1     | 10.891    | 951694 | 89381  | 100.000 |
| Total |           | 951694 | 89381  | 100.000 |



Figure S215. HPLC chromatogram of compound 32.

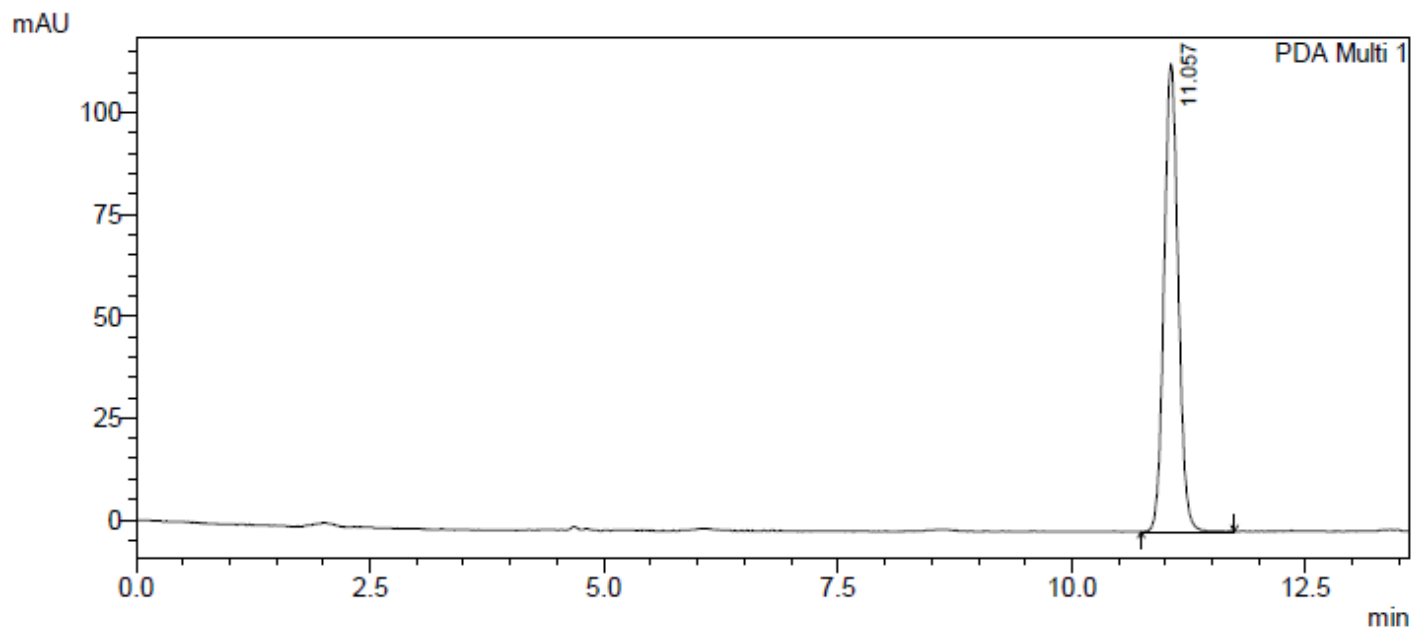

1 PDA Multi 1/200nm 4nm

PeakTable

PDA Ch1 200nm 4nm

| Peak# | Ret. Time | Area    | Height | Area %  | Height % |
|-------|-----------|---------|--------|---------|----------|
| 1     | 11.057    | 1210675 | 114909 | 100.000 | 100.000  |
| Total |           | 1210675 | 114909 | 100.000 | 100.000  |

Figure S216. HPLC chromatogram of compound 33.

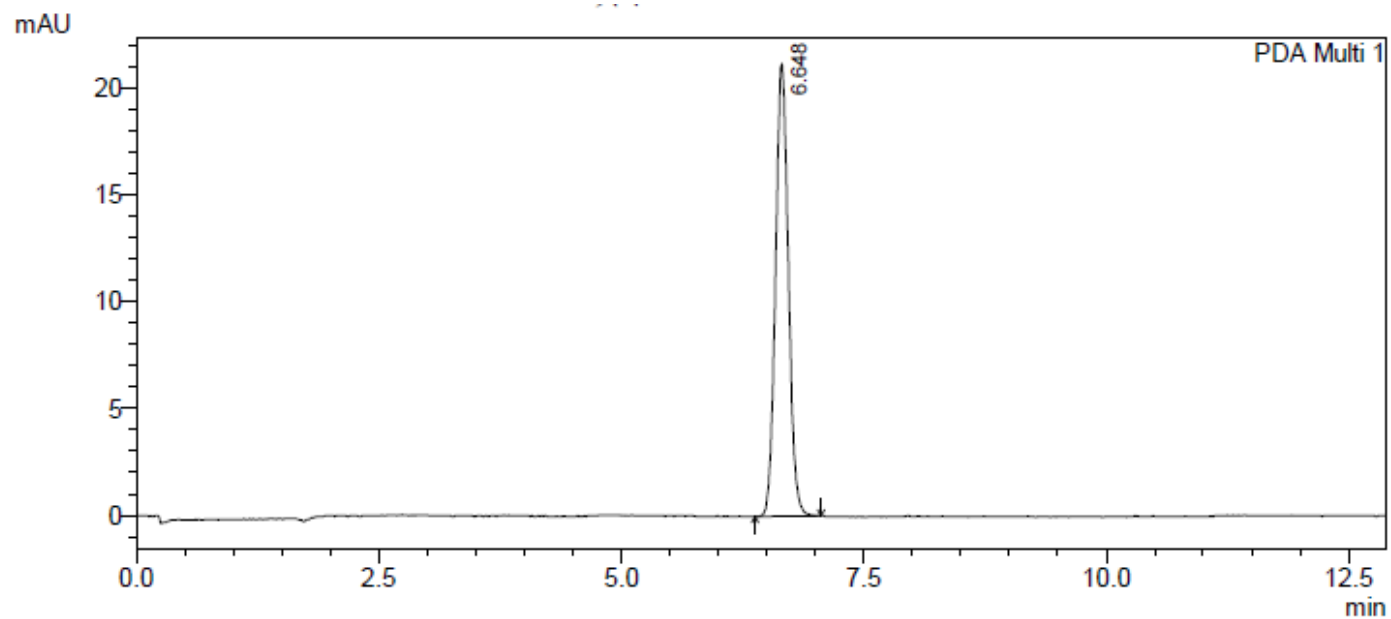

1 PDA Multi 1/254nm 4nm

PeakTable

PDA Ch1 254nm 4nm

| Peak# | Ret. Time | Area   | Height | Area %  | Height % |
|-------|-----------|--------|--------|---------|----------|
| 1     | 6.648     | 196112 | 21144  | 100.000 | 100.000  |
| Total |           | 196112 | 21144  | 100.000 | 100.000  |

Figure S217. HPLC chromatogram of compound 34.

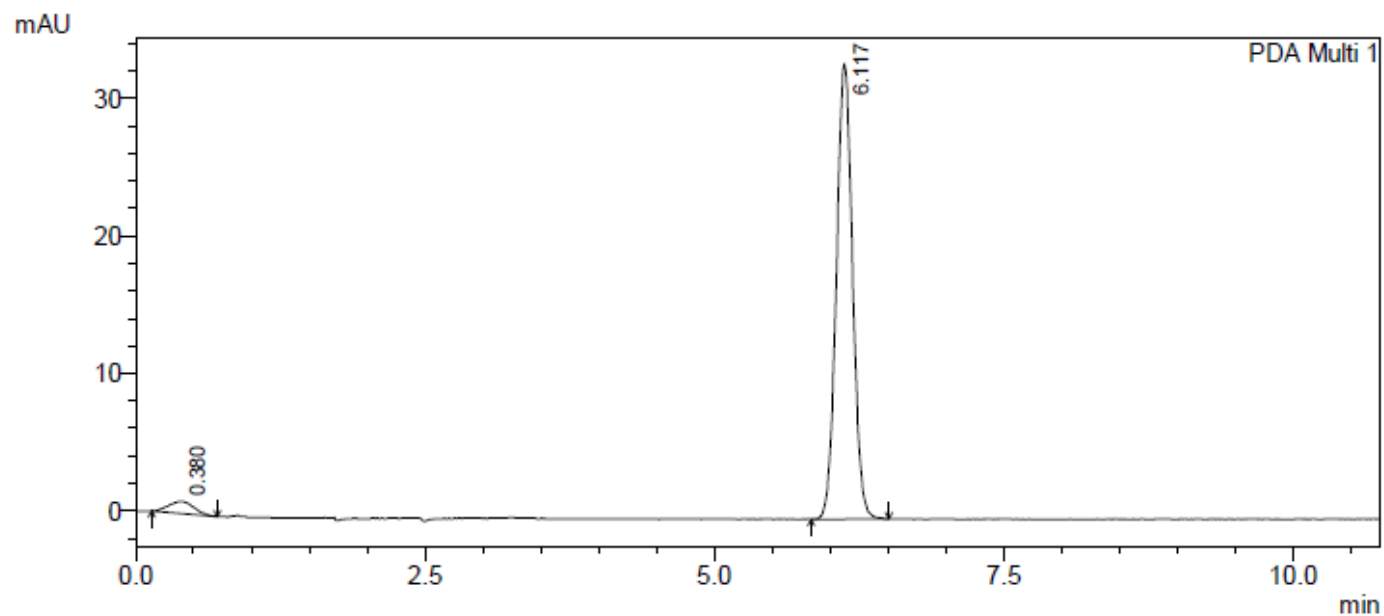

1 PDA Multi 1/254nm 4nm

PeakTable

PDA Ch1 254nm 4nm

| Peak# | Ret. Time | Area   | Height | Area %  | Height % |
|-------|-----------|--------|--------|---------|----------|
| 1     | 0.380     | 13149  | 868    | 3.931   | 2.555    |
| 2     | 6.117     | 321377 | 33083  | 96.069  | 97.445   |
| Total |           | 334527 | 33950  | 100.000 | 100.000  |
